# Supplementary material for: A case–control study on predicting population risk of suicide using health administrative data: a research protocol
Source: PubMed Central journal article supplement — BMJ Open. 2023 Feb 27;13(2):e066423. doi: 10.1136/bmjopen-2022-066423 (PMC9972456; doi:10.1136/bmjopen-2022-066423), 2023-02-27
Supplement: bmjopen-2022-066423.draft_revisions.pdf [file bmjopen-2022-066423.draft_revisions.pdf]

# BMJ Open

BMJ Open is committed to open peer review. As part of this commitment we make the peer review history of every article we publish publicly available.

When an article is published we post the peer reviewers' comments and the authors' responses online. We also post the versions of the paper that were used during peer review. These are the versions that the peer review comments apply to.

The versions of the paper that follow are the versions that were submitted during the peer review process. They are not the versions of record or the final published versions. They should not be cited or distributed as the published version of this manuscript.

BMJ Open is an open access journal and the full, final, typeset and author-corrected version of record of the manuscript is available on our site with no access controls, subscription charges or pay-per-view fees (<http://bmjopen.bmj.com>).

If you have any questions on BMJ Open's open peer review process please email [info.bmjopen@bmj.com](mailto:info.bmjopen@bmj.com)

# BMJ Open

## A case-control study on predicting population risk of suicide using health administrative data: A research protocol

|                               |                                                                                                                                                                                                                                                                                                                                                                                                                                                                                                                                                                                                                                                                                                                                                                                                                                                                                                                                                                                    |
|-------------------------------|------------------------------------------------------------------------------------------------------------------------------------------------------------------------------------------------------------------------------------------------------------------------------------------------------------------------------------------------------------------------------------------------------------------------------------------------------------------------------------------------------------------------------------------------------------------------------------------------------------------------------------------------------------------------------------------------------------------------------------------------------------------------------------------------------------------------------------------------------------------------------------------------------------------------------------------------------------------------------------|
| Journal:                      | <i>BMJ Open</i>                                                                                                                                                                                                                                                                                                                                                                                                                                                                                                                                                                                                                                                                                                                                                                                                                                                                                                                                                                    |
| Manuscript ID                 | bmjopen-2022-066423                                                                                                                                                                                                                                                                                                                                                                                                                                                                                                                                                                                                                                                                                                                                                                                                                                                                                                                                                                |
| Article Type:                 | Protocol                                                                                                                                                                                                                                                                                                                                                                                                                                                                                                                                                                                                                                                                                                                                                                                                                                                                                                                                                                           |
| Date Submitted by the Author: | 06-Jul-2022                                                                                                                                                                                                                                                                                                                                                                                                                                                                                                                                                                                                                                                                                                                                                                                                                                                                                                                                                                        |
| Complete List of Authors:     | Wang, JianLi; Dalhousie University, Department of Community Health and Epidemiology<br>Gholi Zadeh Kharrat, Fatemeh; Laval University, Department of Electrical Engineering and Computer Engineering<br>Pelletier, Jean-François; University of Montreal, Department of Psychiatry<br>Rochette, Louis ; Institut national de sante publique du Quebec<br>Pelletier, Eric; INSPQ<br>Lévesque, Pascale; Institut national de santé publique du Québec (INSPQ)<br>Massamba, Victoria; Institut national de santé publique du Québec (INSPQ)<br>Brousseau-Paradis, Camille; University of Montreal, Department of Psychiatry<br>Mohammed, Mada; Dalhousie University, Department of Community Health and Epidemiology<br>Gariépy, Geneviève; Public Health Agency of Canada; University of Montreal, Department of Social and Preventive Medicine<br>Gagné, Christian; Laval University, Electrical Engineering<br>Lesage, Alain ; Institut universitaire en sante mentale de Montreal |
| Keywords:                     | Suicide & self-harm < PSYCHIATRY, PUBLIC HEALTH, PSYCHIATRY, HEALTH SERVICES ADMINISTRATION & MANAGEMENT                                                                                                                                                                                                                                                                                                                                                                                                                                                                                                                                                                                                                                                                                                                                                                                                                                                                           |
|                               |                                                                                                                                                                                                                                                                                                                                                                                                                                                                                                                                                                                                                                                                                                                                                                                                                                                                                                                                                                                    |

SCHOLARONE™  
Manuscripts

## A case-control study on predicting population risk of suicide using health administrative data: A research protocol

JianLi Wang,<sup>1</sup> Fatemeh Gholi Zadeh Kharrat<sup>2</sup>, Jean-François Pelletier,<sup>3</sup> Louis Rochette,<sup>4</sup> Eric Pelletier,<sup>4</sup> Pascale Lévesque,<sup>4</sup> Victoria Massamba,<sup>4</sup> Camille Brousseau-Paradis,<sup>3</sup> Mada Mohammed,<sup>1</sup> Geneviève Gariépy,<sup>5,6,7</sup> Christian Gagne, Alain Lesage<sup>3,8</sup>

1. Department of Community Health and Epidemiology, Faculty of Medicine, Dalhousie University.
2. Department of Electrical Engineering and Computer Engineering, Laval University.
3. Department of Psychiatry, University of Montreal, QC, Canada.
4. Institut national de santé publique du Québec (INSPQ), Quebec City, Quebec, Canada.
5. Centre for Surveillance and Applied Research, Health Promotion and Chronic Disease Prevention Branch, Public Health Agency of Canada, Ottawa, Canada
6. Department of Social and Preventive Medicine, School of Public Health, University of Montreal, Montreal, Canada
7. Montreal Mental Health University Institute Research Center, Montreal, Canada.
8. Research Center, Institut universitaire de santé mentale de Montréal. Montreal, Canada.

Corresponding author:

JianLi Wang

5790 University Ave.

Department of Community Health and Epidemiology

Faculty of Medicine, Dalhousie University

[Jianli.wang@dal.ca](mailto:Jianli.wang@dal.ca)

## Abstract

**Introduction:** Suicide has a complex etiology and is a result of the interaction among the risk and protective factors at the individual, healthcare system, and population levels. Therefore, policy and decision makers and mental health service planners can play an important role in suicide prevention. Although a number of suicide risk predictive tools have been developed, these tools were designed to be used by clinicians for assessing individual risk of suicide. There have been no risk predictive models to be used by policy and decision makers for predicting population risk of suicide. This paper aimed to describe the rationale and methodology for developing risk predictive models for population risk of suicide.

**Methods and analysis:** A nested case-control study design will be used to develop sex-specific risk predictive models for population risk of suicide, using statistical regression and machine learning techniques. Routinely collected health administrative data in Quebec, Canada, and community level social deprivation and marginalization data will be used. The developed models will be transformed into synthetic estimation models that can be readily used by policy and decision makers. Two rounds of qualitative interviews with end-users and other stakeholders were proposed to understand their views about the developed models and potential systematic, social and ethical issues for implementation; the first round of qualitative interviews have been completed. We included 9440 suicide cases (7234 males and 2206 females) and 661,780 controls for model development. Three hundred and forty seven variables at individual, healthcare system and community levels have been identified and will be included LASSO regression for feature selection.

**Ethics and dissemination:** This study is approved by the Health Research Ethics Committee of Dalhousie University, Canada. This study takes an integrated knowledge translation approach, involving knowledge users from the beginning of the process.

### **Strengths and limitations of this study:**

- This is the first study on developing risk predictive models for population risk of suicide, which are to be used policy and decision makers, shifting the paradigm from predicting individual risk of suicide.
- The candidate predictors included variables at individual, healthcare system and community levels, which reflected the complex etiology of suicide.
- This study used routinely collected health administrative data, which are readily accessible to policy and decision makers. If successful, the implementation of the models in the process of policy and decision making will have better sustainability.
- This study used a nested case-control study design, which included all suicide cases (n = 9,440) in Quebec. The inclusion of all suicide cases maximized the data efficiency and the generalizability of the models.
- Predicting population risk of suicide is new. The methodology of model development and validation needs to be improved.

## Introduction

Suicide is a major international public health problem. Each year, over 4,500 Canadians take their own life,(1) and more than 700,000 people die because of suicide worldwide,(2) imposing enormous impacts on families, communities and societies. As such, suicide prevention has been a top priority of many countries.

Suicide has a complex etiology and is a result of the interaction among the risk and protective factors at the individual, healthcare system, and population levels.(3–5) Therefore, policy and decision makers and mental health service planners can play an important role in suicide prevention. To facilitate suicide prevention planning, mechanisms should be in place that enable policy and decision makers to make informed decisions and mobilize resources to high-risk populations at the right places, before tragic events occur. This vision requires us to shift the paradigm from predicting individual risk to predicting population risk of suicide. However, the existing suicide risk assessment/predictive tools are not suitable for predicting population risk. Most of the existing risk assessment/risk predictive tools for suicide were designed to be used by clinicians; they were not designed for policy and decision makers.(6) Clinicians often use these tools to determine if individual patients are at high risk of suicide presently or in short term (e.g., next week). Whereas policy and decision makers are more concerned about the rate of suicide at the community level (e.g., health regions, provinces/states) in the medium or long term (e.g., in the next 5 or 10 years), driven partly by budgetary decisions that are often made on yearly basis. Clinicians and policy/decision makers may have different emphases on risk predictive tools as well. For clinicians, an ideal suicide risk predictive tool should have high discriminative power (e.g., a large C statistics), high sensitivity, specificity and positive predictive value. For policy and decision makers, a tool with excellent calibration (i.e., how closely the predicted risk agrees with actual risk in the population) is more useful. To facilitate policy development in suicide prevention at the population level, risk predictive models specifically designed for policy and decision makers are needed.

Ideally, risk predictive models for population risk of suicide are based on large data from the target population. For example, Gradus and colleagues developed sex-specific machine learning algorithms for suicide using data from eight Danish national health and social registries which cover more than 90% of the Danish population.(7) Kessler et al.'s machine learning algorithms targeted US Army soldiers who were hospitalized.(8) Accordingly, these risk predictive algorithms may potentially be used for forecasting the risk of suicide in Danish general population and in the US Army population, respectively. Furthermore, predictive models for population risk may use not only individual data, but also health system level (e.g., quality of mental health care, mental health budget), and community level data (e.g., unemployment rate and social deprivation levels in the community). For instance, Marks and colleagues developed a predictive model for identifying counties at high risk of overdose mortality, which included county-level education, poverty rate, unemployment rate, overdose gravity, and other county-level indicators, among the 3106 counties in the United States.(9) Given the complex etiology of suicide, predicting population risk of suicide may benefit greatly from the integration of data at the individual, health system and community levels.

1  
2  
3  
4 We undertook a project to develop sex-specific risk predictive models to be used by policy and  
5 decision makers to forecast population risk of suicide at the health region level, using routinely  
6 collected health administrative data, and to identify the barriers and facilitators to  
7 implementation and explore the ethical and privacy issues of the prediction program. In this  
8 manuscript, we aimed to describe the methodology of the project, to inform methodological  
9 discussions and suicide prevention strategies.  
10  
11

## 12 13 **Methods**

14  
15 This project encompasses the components of quantitative and qualitative investigations and an  
16 integrated knowledge translation (IKT). IKT is a model of research co-production, whereby  
17 knowledge users are integrated throughout the research process and who can use the research  
18 recommendations in practice or policy.<sup>(10)</sup> IKT approaches are used to improve the relevance  
19 and impact of research. The quantitative research involved developing and validating risk  
20 prediction models for suicide using advanced ML and visualization methods. The qualitative  
21 research is to understand the potential implementation, social, ethics and legal issues  
22 associated with the risk prediction program. Inline with IKT principles, we involved policy and  
23 decision makers at the provincial and national levels, and people with lived experience of  
24 suicidality from the beginning of the project. The methodology of each component is described  
25 below.  
26  
27  
28  
29

### 30 ***Model development and validation***

31 *Target population:* The general population residing in the province of Quebec, Canada. The  
32 province had a population of over 8.6 million people in 2021, and about 95% of the population  
33 reported being able to conduct a conversation in French. In Quebec, health services are  
34 planned and delivered through 18 health regions, 22 integrated health and social services  
35 centres, and 166 Centres locaux de santé Communautaire (CLSCs). Budgetary decisions are  
36 made at the levels of province and health regions/integrated health and social services centres.  
37  
38  
39

40 *Data sources:* We will develop the prediction tools by linking the suicide database, the Ministry  
41 of Health and Social Services (MSSS) public financial reports (Contour financier - Publications du  
42 ministère de la Santé et des Services sociaux (gouv.qc.ca), and the Canadian Urban  
43 Environmental Health Research (CANUE) data. The suicide database gathers individual-level  
44 data annually based on residents health insurance number from five administrative databases:  
45 the vital statistics death database, the physician claims database, the hospital discharge  
46 database, the Insured Person Registration File and the public drug plan. These databases cover  
47 up to 98% of the population in Quebec and contain data for over 20,000 suicides occurred since  
48 1996. With the suicide database and other linkable Ministry financial databases, individual (e.g.,  
49 sex, age), program (e.g., hospitalization, emergency department visits), and system (e.g.,  
50 mental health and addiction budgets) level indicators can be identified, and the indicators at  
51 each level may be classified into the broad categories of input and process.<sup>(4)</sup>  
52  
53  
54  
55  
56  
57  
58  
59  
60

CANUE is a Canadian consortium aiming to build a unique repository of standardized metrics of urban, sub-urban, and rural characteristics, as well as the tools used to produce them ([www.canue.ca](http://www.canue.ca)). The CANUE data contain indicators for unemployment, social deprivation, access to health services and built environment at the community level, and can be linked with health administrative data by postal codes. The CANUE is open and free for research projects. The data linkage was performed at the Quebec Institute of Public Health (INSPQ) where the suicide data are kept. Linking the databases provides an unprecedented sample size and the capability of examining individual, neighborhood, programmatic and systemic indicators of population suicide risk.

*Study design:* Because the base rate of suicide in the population is low, we proposed to use a nested case-control study design to develop sex-specific suicide risk predictive algorithms, using both logistic regression modeling and machine learning (ML) techniques. We selected all suicide cases that occurred from January 1<sup>st</sup> 2002 to December 31<sup>st</sup> 2010.(11) The control group was a 1% random sample of living individuals in Quebec each year, identified from the suicide database. The cases and controls were not matched to allow for maximum variability in predictors.

*Predictors:* Individual, programmatic, systemic and community factors (see Appendix I) measured five years prior to the suicide events were used to develop the risk predictive algorithms. The selection of candidate predictors are determined by content knowledge (i.e., known relationships between suicide or suicide behaviors and individual and local area level quality of health care), feasibility of routine data collection, clinical utility and policy relevance. Therefore, the pre-determination of candidate predictors was a joint effort between the team members, collaborators, health policy and decision makers and other stakeholders.

ML can produce complex estimations by searching data for relevant pieces of information and their complex interactions. Therefore, ML is best suited to tackle the combined challenges of high dimensional data analysis associated with risk prediction for suicide. Some predictors that may change over time (e.g., diagnoses, medications, service use, etc.) will be dummy-coded to create time-varying predictors (i.e., intervals of 0-3,0-6, 0-12, 0-24, 0-36,0-48, and 0-60 months before the first day of the suicide month). Because we included all suicide cases and a sample of controls, the proportion of suicide in the sample is different from that in the general population. Therefore, sampling weights (inversed probability of being selected) were assigned to the controls, while the weight of 1 was assigned to the cases, to ensure the models are applicable to the whole population.

#### *Model development – Machine learning (ML).*

ML is a part of Artificial intelligence (AI) that aims to construct systems that automatically improve through experience using advanced statistical and probabilistic techniques. ML has provided significant benefits to a range of fields. Recent research has shown a range of advantages of ML that can assist in detecting, diagnosing, predicting suicide, and treating mental health problems.(12,13) ML methods are divided into categories, i.e., supervised, semi-supervised, unsupervised, and reinforcement. To predict the population risk of suicide, we will develop supervised learning models such as logistic regression, Random Forest, XGBoost, and

1  
2  
3 Multilayer perceptron with an optimized model architecture. These models' predictive capacity  
4 will be assessed by generating the receiver operating characteristic (ROC) curves calculating its  
5 AUC and various operating characteristics, including sensitivity, specificity, and positive  
6 predictive value for a variety of thresholds. From that, we will make simulations of changes  
7 coming from policies by modifying the population composition for reflecting the effect of  
8 policies change (e.g., mental health diagnoses, socio-economic factors, health system resources  
9 allocation) and evaluate their effect on the suicide rates predicted, comparing these with rates  
10 obtained with the current population and population modified differently. Moreover,  
11 interpretability is essential when we deal with healthcare data. It is significant because it is  
12 necessary to understand the casualty of learned representations for decision support also helps  
13 to assess whether the model is considering the right features while making a specific prediction.  
14 Feature-based model explainability technique, such as Shapley Additive Explanations (SHAP),  
15 was derived from game theory; each player decides to contribute to a coalition of players to  
16 produce a total value that will be superior to the sum of their individual values. SHAP relies on  
17 the Shapley value of both local and global explanations. Shapley's values are model-agnostic,  
18 and the marginal contribution of each feature can be calculated by using the input data and the  
19 predictions.<sup>(14,15)</sup> SHAP will use with the global explanation of how much the input features  
20 contribute to a model's output.  
21  
22  
23  
24  
25

### 26 Model development – logistic regression.

27  
28  
29 As the first step of model development, we will include all variables in penalized least absolute  
30 shrinkage and selection operator (LASSO) regression. The LASSO penalization factor selects  
31 important predictors by shrinking coefficients for weaker predictors toward zero, excluding  
32 predictors with estimated zero coefficients from the final sparse prediction model. We will  
33 perform a correlation analysis among variables selected by the LASSO regression, and identify  
34 variables that are strongly correlated (e.g.,  $\gamma \geq 0.60$ ). Correlated variables will be discussed by  
35 team members, and the variables that have better policy implication and clinical utility will be  
36 kept and become the candidate predictors for model development.  
37  
38  
39

40 We will use fixed effect logistic regression to develop the sex-specific statistical models that  
41 accounted for clusterings at the health regions. Backward selection method will be used to  
42 identify the model with the best calibration and discrimination. The decisions of model  
43 selection will be initially based on the changes in the values of Akaike Information Criterion  
44 (AIC) and Bayesian Information Criterion (BIC).<sup>(16)</sup> Since BIC penalizes for the complexity of the  
45 model more than AIC, selection with BIC will generally lead to smaller models than selection  
46 with AIC.<sup>(16)</sup> Once a model is developed, prediction accuracy will be assessed by the  
47 discrimination and calibration of the model. Discrimination is the ability of a prediction model  
48 to separate those who experienced the outcome events from those who did not. We will  
49 quantify this by calculating the C statistic, analogous to the area under a receiver operating  
50 characteristic curve. Calibration measures how closely predicted outcomes agree with actual  
51 outcomes. For this, we will use D'Agostino's version of the Hosmer-Lemeshow Chi square  
52 statistic. Discrimination and calibration compete with each other. Given that the program will  
53 be used to forecast population risk of suicide, we will prioritize calibration over discrimination.  
54  
55  
56  
57



Stakeholders from different perspectives and scientific backgrounds will meet to determine the content and performance of the risk prediction models developed by statistical and ML techniques, the appropriate formats of data visualization that are acceptable to policy and decision makers, and the feasibility of implementation, which will in turn inform the revision of the models.

The second step of the model development is to estimate the synthetic rates, consisting of two stages. First, for each predictor, the proportions of individuals within each category of that predictor in the initial modeling will be computed, separately by regions. For instance, if hospitalization due to suicide attempt in the past 5 years is a predictor in the model, the proportion of individuals with this attribute in a specific health region is calculated. If age is a continuous variable in the model, the mean age of the population in a health region is estimated. A syntax program will then be prepared to apply the regression coefficients to the corresponding proportions and means in the data set, and to calculate the logit estimates for each of health regions. The resulting logit values for each of the health region will then be converted into probabilities, giving the estimated risk of suicide in the health region. The region's population counts from Statistics Canada Census data or the provincial health administrative database multiplied by the estimated risk will yield the estimated number of suicide in this health region.

The fitted logistic regression model described above estimates the proportion of suicide in the population at a given moment of time as a function of its risk factors in the past. This model is fundamentally etiologic, where the natural reference-point is the moment of the outcome's occurrence, corresponding to the zero time on the etiologic time scale. However, assessment of population risk of suicide over a particular span of time in the future involves a prognostic outlook, where the natural reference-point is the time of prognostication, corresponding to the zero time on the prognostic time scale. Predictive models for individual risk are often developed using a cohort/closed study-population and express the risk of future occurrence of the outcome as a function of current risk factors, and involves consideration of the values of the risk factors at issue at the prognostic time zero only. Whereas population risk models are applied in the context of a dynamic/open population and the estimated risk is a function of risk factors not only at the prognostic time-zero but also throughout the time span at issue. For example, the risk of suicide in the next 5 years in a health region may not only depend on the proportions of people with major depression and of hospitalization due to suicide attempt in the past, but also on whether there will be a reduction or increase in these parameters over the next 5 years, if so in which year. Thus, the population risk of suicide may be projected using the developed model to each future year over a pre-defined time interval. The cumulative incidence of suicide ( $CI_{0 \text{ to } t}$ ) from time  $T = 0$  to  $T = t$  can be estimated as a function of time- and profile specific risk operating over that time interval:(17)

$$CI_{0 \text{ to } t} = 1 - \exp \left[ - \int_0^t (ID_u) du \right]$$

1  
2  
3 The estimated cumulative risk represents the estimated risk of suicide of a health region over  
4 the time period at issue conditionally on the health region's risk profile.  
5  
6

### 7 Validation:

8  
9 For model validation, we will use the suicide data from January 1<sup>st</sup>, 2011 to December 31<sup>st</sup>,  
10 2019. We will first calculate the yearly, 5-year and 10-year incidence of suicide death at the  
11 provincial and health regional levels in males and females (i.e., observed risk). We will apply the  
12 developed models in the validation data to estimate the yearly, 5-year and 10-year incidence of  
13 suicide death at the provincial and health regional levels in males and females (i.e., predicted  
14 risk). We will visually compare and calculate the differences between the predicted and  
15 observed risks; smaller differences indicate better calibration with the data and model  
16 accuracy. We will use four indicators for assessing model performance: mean average error  
17 (MAE), root mean square error (RMSE), Spearman's  $r$ , and proportion of correct identification  
18 of high risk regions.(9) The MAE is the average magnitude of the difference between the  
19 predicted and observed suicide death rate for each health region. The RMSE is the square root  
20 of the average magnitude of the difference squared, therefore is similar to MAE but penalises  
21 prediction errors with greater magnitude. More accurate predictions will result in smaller MAE  
22 and RMSE. Spearman's  $r$  compares the predicted ranking of health regions by suicide death rate  
23 compared with the actual observed rankings; results closer to 1 indicate that the model was  
24 more effective at rank-ordering regions based on suicide death rate. To assess the extent to  
25 which high risk regions are correctly identified, we will first disaggregate the predicted and  
26 observed suicide rates into quartile groups and categorised all health regions into their  
27 corresponding quartiles for both predicted and observed suicide rates. The proportion of health  
28 regions observed in the top quartile of observed suicide death rates that were rightly predicted  
29 to be in the top quartile will be calculated.  
30  
31  
32  
33  
34  
35

### 36 **Qualitative study**

37 The objective of the qualitative study is to investigate the end-users' views about predicting  
38 population risk of suicide, and the potential social, legal, ethical, and privacy issues and  
39 mitigation strategies for implementing such a predictive system. Using snowballing techniques,  
40 we have invited policy and decision makers at the federal and provincial levels, mental health  
41 professionals, individuals who have extensive experience in working with policy and decision  
42 makers and who have expertise in suicide prevention, social and health policy, as well as health  
43 administrative data, people with lived experience, and advocates for families bereaved by  
44 suicide. The qualitative study consists of two rounds of interviews. The first round of interviews  
45 were carried out after the general team meeting held in July 2021, at which the study design  
46 was finalized. The second round of interviews will be organized once the predictive models are  
47 developed. The first round interviews were held through zoom meetings, and follow a series of  
48 semi-structured interview questions related to the objectives. Qualitative data collected during  
49 the focus groups and qualitative interviews are audio recorded, transcribed, and analyzed with  
50 the support of QDA Miner (Provalis).(18) The second round of interviews will be conducted  
51 once the prototype models are developed and presented at the second general team meeting  
52 which is to be held in late 2022. We will perform an inductive thematic analysis of the focus  
53  
54  
55  
56  
57

1  
2  
3 group and individual interview material, which will be fed by answers to the open questions  
4 regarding potential (i) perceptions about the developed prediction models, (ii) social issues, (iii)  
5 legal issues, (iv) ethical and privacy issues, and (v) mitigation strategies for implementing such a  
6 system. Transcripts will be coded in order to demarcate segments within each of them. We will  
7 look for words or short phrases that demonstrate how the associated data segments inform our  
8 research objectives. Detailed results from the qualitative analysis of this material will be  
9 presented in a separate paper.  
10  
11

### 12 13 **Patient and Public Involvement**

14  
15 Engagement with relevant stakeholders (e.g., policy/decision makers, and people with lived  
16 experience) through IKT is critical for developing equitable risk predictive algorithms and for  
17 maximizing the potential for future implementation. For this project, we have identified and  
18 engaged policy/decision makers from the Public Health Agency of Canada and from the INSPQ,  
19 as well as 8 people with lived experience. The representatives of INSPQ (EP, PL, VM, LR) were  
20 involved in study conceptualization and grant application. PL has been facilitating data  
21 extraction, participated in the bi-weekly team meetings. As described above, we have engaged  
22 people with lived experience through the qualitative interviews. The next round of qualitative  
23 interviews will be held after the prototype of the risk predictive models are developed to have a  
24 better understanding about privacy, ethics and implementation issues.  
25  
26  
27  
28

### 29 **Ethics and dissemination**

30  
31 This study will use routinely collected health administrative data. The analysis of secondary de-  
32 identified data at the INSPQ where the data are kept will not incur physical and psychological  
33 harms. The results of the study will be vetted by analysts at the INSPQ to ensure no privacy and  
34 confidentiality will be breached. The data used for this study will be kept at INSPQ for 15 years.  
35 The results will be presented in peer-reviewed journals, at academic conferences, and shared  
36 with knowledge users who were engaged from the beginning.  
37  
38  
39

40 Through this study, we aimed to develop risk prediction models to be used by policy and  
41 decision makers to forecast population risk of suicide at the provincial and health region levels,  
42 using routinely collected health administrative data and other publicly available area-level data.  
43 The potential utility of such predictive tools has been attested by the active involvement by the  
44 policy and decision makers at the federal and provincial levels and people with lived  
45 experience. Nevertheless, predicting population risk of suicide is new and has not been well  
46 studied. There are a number of methodological and implementation challenges to be  
47 addressed.  
48  
49

50  
51 Routinely collected health administrative data and population health survey data represent a  
52 unique opportunity for population health projection because it covers a majority of the general  
53 population in catchment areas, and the data can be readily accessed by policy and decision  
54 makers. Many risk predictive models have been developed for physical and mental health  
55 problems in the general population. For example, individual data from population health  
56  
57

1  
2  
3 surveys and health administrative databases have been used to develop risk predictive models  
4 for diabetes,(19) heart disease,(20) and major depression.(21,22) These models may be used to  
5 identify high risk individuals in the community; they can also be used to forecast the population  
6 risk in the future. However, few models have integrated individual, healthcare system, and  
7 community level predictors in the same model. In this study, we proposed to include data from  
8 these different levels in model development, and convert the models into synthetic estimation  
9 models. There may be different approaches for integrating data from different levels for  
10 population risk prediction. Future studies are needed to explore the best method for data  
11 integration.  
12  
13  
14

15 The performance of a risk predictive model is commonly assessed by indicators of model  
16 discrimination and calibration.(23) Whereas model discrimination is critical for individual risk  
17 predictive models, policy and decision makers' focus is on the whole population rather than  
18 individuals. Therefore, model calibration plays a more important role in the performance of a  
19 population risk model. We proposed four indicators for assessing model performance.  
20 However, it is not clear how much error (the difference between predicted and observed risks)  
21 policy and decision makers may tolerate for population risk prediction, how they perceive the  
22 importance of model discrimination, whether other indicators exist for assessing population  
23 risk prediction models. We will explore these aspects through our qualitative study, and also  
24 encourage others to consider these in future studies. Similarly, we welcome discussions and  
25 debates about the methods for validating population risk predictive models. An individual risk  
26 predictive model is often developed using longitudinal cohort/closed population data and  
27 validated in a different but related cohort/closed population. This poses challenges for  
28 population risk predictive models because the population in a community/health region is open  
29 and dynamic. Appropriate methods for model validation and acceptability need to be  
30 developed and agreed by the research community and policy and decision makers.  
31  
32  
33  
34  
35

36 Despite the challenges for developing population risk predictive model for suicide, research is  
37 urgently needed to address this important population health issue. This study represents one of  
38 the early steps in building such risk predictive models and methodology development, as part  
39 of the collective efforts for moving the field forward.  
40  
41  
42  
43  
44  
45  
46  
47  
48  
49  
50  
51  
52  
53  
54  
55  
56  
57  
58  
59  
60

**Authors' contribution:**

JLW drafted the manuscript. All co-authors were involved in study design, grant application, manuscript review and approval.

**Funding statement:**

This study is supported by a New Frontiers for Research Funds grant from Tri-Agency Institutional Programs Secretariat, Government of Canada, and by a Tier I Canada Research Chair award to JLW. The funders play no role in design and operation of this study.

**Competing interests:** none

## References

1. Statistics Canada. Deaths and age-specific mortality rates, by selected grouped causes [Internet]. 2019. Available from: <https://www150.statcan.gc.ca/t1/tbl1/en/tv.action?pid=1310039201>
2. World Health Organization. Suicide [Internet]. [cited 2022 May 15]. Available from: <https://www.who.int/news-room/fact-sheets/detail/suicide>
3. Mental Health Commission of Canada. RESEARCH ON SUICIDE AND ITS PREVENTION: What the current evidence reveals and topics for future research [Internet]. Ottawa, Canada; 2018. Available from: [www.mentalhealthcommission.ca](http://www.mentalhealthcommission.ca)
4. Thibodeau L, Rahme E, Lachaud J, Rochette L, John A, Reneflot A, et al. Individual , programmatic and systemic indicators of the quality of mental health care using a large health administrative database : an avenue for preventing suicide mortality. 2018;38(7):295–304.
5. Tondo L, Albert MJ, Baldessarini RJ, Bini L. Suicide Rates in Relation to Health Care Access in the United States: An Ecological Study. Vol. 67, *J Clin Psychiatry*. 2006.
6. Bolton JM, Gunnell D, Turecki G. Suicide risk assessment and intervention in people with mental illness. Vol. 351, *BMJ (Online)*. BMJ Publishing Group; 2015.
7. Gradus JL, Rosellini AJ, Horváth-Puhó E, Street AE, Galatzer-Levy I, Jiang T, et al. Prediction of Sex-Specific Suicide Risk Using Machine Learning and Single-Payer Health Care Registry Data from Denmark. *JAMA Psychiatry*. 2020;77(1).
8. Kessler RC, Warner LTCCH, Ivany LTCC, Petukhova M v, Rose S, Bromet EJ, et al. Predicting U.S. Army suicides after hospitalizations with psychiatric diagnoses in the Army Study to Assess Risk and Resilience Resilience in Service members ( Army STARRS ). *JAMA Psychiatry*. 2015;72(1):49–57.
9. Marks C, Abramovitz D, Donnelly CA, Carrasco-Escobar G, Carrasco-Hernández R, Ciccarone D, et al. Identifying counties at risk of high overdose mortality burden during the emerging fentanyl epidemic in the USA: a predictive statistical modelling study. *The Lancet Public Health*. 2021;6(10).
10. Boland L, Kothari A, McCutcheon C, Graham ID. Building an integrated knowledge translation (IKT) evidence base: Colloquium proceedings and research direction. Vol. 18, *Health Research Policy and Systems*. 2020.
11. Vasiliadis HM, Lesage A, Latimer E, Seguin M. Implementing suicide prevention programs: Costs and potential life years saved in Canada. *Journal of Mental Health Policy and Economics*. 2015;18(3):147–55.
12. Shatte ABR, Hutchinson DM, Teague SJ. Machine learning in mental health: A scoping review of methods and applications. Vol. 49, *Psychological Medicine*. 2019.
13. McHugh CM, Large MM. Can machine-learning methods really help predict suicide? Vol. 33, *Current opinion in psychiatry*. 2020.
14. Bowen D, Ungar L. Generalized SHAP: Generating multiple types of explanations in machine learning. *ArXiv*. 2020 Jun 12;

15. Sundararajan M, Najmi A. The many Shapley values for model explanation. ArXiv. 2019 Aug 22;
16. Vrieze SI. Model selection and psychological theory: A discussion of the differences between the Akaike information criterion (AIC) and the Bayesian information criterion (BIC). *Psychological Methods*. 2012;17(2):228–243.
17. Karp I, Sylvestre MP, Abrahamowicz M, Leffondré K, Siemiatycki J. Bridging the etiologic and prognostic outlooks in individualized assessment of absolute risk of an illness: Application in lung cancer. *European Journal of Epidemiology*. 2016 Nov 1;31(11):1091–9.
18. Rivas C, Tkacz D, Antao L, Mentzakis E, Gordon M, Anstee S, et al. Automated analysis of free-text comments and dashboard representations in patient experience surveys: a multimethod co-design study. *Health Services and Delivery Research*. 2019;7(23).
19. Rosella LC, Manuel DG, Burchill C, Stukel TA. A population-based risk algorithm for the development of diabetes: Development and validation of the diabetes population risk tool (DPoRT). *Journal of Epidemiology and Community Health*. 2011;65(7):613–20.
20. Manuel DG, Tuna M, Bennett C, Hennessy D, Rosella L, Sanmartin C, et al. Development and validation of a cardiovascular disease risk-prediction model using population health surveys: The Cardiovascular Disease Population Risk Tool (CVDPoRT). *CMAJ*. 2018;190(29):E871–82.
21. Wang J, Manuel D, Williams J, Schmitz N, Gilmour H, Patten S, et al. Development and validation of prediction algorithms for major depressive episode in the general population. *Journal of Affective Disorders*. 2013;151(1):39–45.
22. Wang J, Sareen J, Patten S, Bolton J, Schmitz N, Birney A. A prediction algorithm for first onset of major depression in the general population: development and validation. *J Epidemiol Community Health (1978)*. 2014 May;68(5):418–24.
23. Steyerberg EW. *Clinical Prediction Models. A Practical Approach to Development, Validation, and Updating*. Springer; 2009.

## APPENDIX I\_1: CANDIDATE PREDICTORS

### i. PSYCHIATRIC DISORDERS DIAGNOSIS<sup>1</sup>

- Substance use disorder<sup>2</sup>
  - o Alcohol use disorder
  - o drug use disorder
- Mood disorder
  - Major depressive disorder
  - Bipolar disorder
- Anxiety disorder
- Schizophrenia
- Personality disorders
- ADHD
- Other diagnosis

| derived variables <sup>34</sup> | variable name       |
|---------------------------------|---------------------|
| Substance use disorder          | psydx_subuse_3      |
| Substance use disorder          | psydx_subuse_6      |
| Substance use disorder          | psydx_subuse_12     |
| Substance use disorder          | psydx_subuse_24     |
| Substance use disorder          | psydx_subuse_36     |
| Substance use disorder          | psydx_subuse_48     |
| Substance use disorder          | psydx_subuse_60     |
| Alcohol use disorder            | Psydx_alcoholuse_3  |
| Alcohol use disorder            | Psydx_alcoholuse_6  |
| Alcohol use disorder            | Psydx_alcoholuse_12 |
| Alcohol use disorder            | Psydx_alcoholuse_24 |
| Alcohol use disorder            | Psydx_alcoholuse_36 |
| Alcohol use disorder            | Psydx_alcoholuse_48 |
| Alcohol use disorder            | Psydx_alcoholuse_60 |
| Drug use disorder               | Psydx_druguse_3     |
| Drug use disorder               | Psydx_druguse_6     |
| Drug use disorder               | Psydx_druguse_12    |
| Drug use disorder               | Psydx_druguse_24    |
| Drug use disorder               | Psydx_druguse_36    |
| Drug use disorder               | Psydx_druguse_48    |
| Drug use disorder               | Psydx_druguse_60    |

The candidate predictors were captured using timeframes of prior 3, 6, 12, 24, 36, 48, and/or 60 months, indicated by the last digits of the variable name. For instance, “psydx\_subuse\_3” and “psydx\_subuse\_6” refer to a diagnosis of substance use disorder in the prior 3 and 6 months, respectively”



|    |                           |                  |
|----|---------------------------|------------------|
| 1  |                           |                  |
| 2  |                           |                  |
| 3  | mood disorder             | Psydx_mood_3     |
| 4  | mood disorder             | Psydx_mood_6     |
| 5  | mood disorder             | Psydx_mood_12    |
| 6  | mood disorder             | Psydx_mood_24    |
| 7  | mood disorder             | Psydx_mood_36    |
| 8  | mood disorder             | Psydx_mood_48    |
| 9  | mood disorder             | Psydx_mood_60    |
| 10 | mood disorder             | Psydx_mood_60    |
| 11 | Anxiety disorder          | psydx_anx_3      |
| 12 | Anxiety disorder          | psydx_anx_6      |
| 13 | Anxiety disorder          | psydx_anx_12     |
| 14 | Anxiety disorder          | psydx_anx_24     |
| 15 | Anxiety disorder          | psydx_anx_36     |
| 16 | Anxiety disorder          | psydx_anx_48     |
| 17 | Anxiety disorder          | psydx_anx_60     |
| 18 | Anxiety disorder          | psydx_anx_60     |
| 19 | Major Depressive Disorder | Psydx_dep_3      |
| 20 | Major Depressive Disorder | Psydx_dep_6      |
| 21 | Major Depressive Disorder | Psydx_dep_12     |
| 22 | Major Depressive Disorder | Psydx_dep_24     |
| 23 | Major Depressive Disorder | Psydx_dep_36     |
| 24 | Major Depressive Disorder | Psydx_dep_48     |
| 25 | Major Depressive Disorder | Psydx_dep_60     |
| 26 | Major Depressive Disorder | Psydx_dep_60     |
| 27 | Bipolar disorder          | Psydx_bipolar_3  |
| 28 | Bipolar disorder          | Psydx_bipolar_6  |
| 29 | Bipolar disorder          | Psydx_bipolar_12 |
| 30 | Bipolar disorder          | Psydx_bipolar_24 |
| 31 | Bipolar disorder          | Psydx_bipolar_36 |
| 32 | Bipolar disorder          | Psydx_bipolar_48 |
| 33 | Bipolar disorder          | Psydx_bipolar_60 |
| 34 | Schizophrenia             | psydx_scz_3      |
| 35 | Schizophrenia             | psydx_scz_6      |
| 36 | Schizophrenia             | psydx_scz_12     |
| 37 | Schizophrenia             | psydx_scz_24     |
| 38 | Schizophrenia             | psydx_scz_36     |
| 39 | Schizophrenia             | psydx_scz_48     |
| 40 | Schizophrenia             | psydx_scz_60     |
| 41 | Personality disorder      | psydx_pd_3       |
| 42 | Personality disorder      | psydx_pd_6       |
| 43 | Personality disorder      | psydx_pd_12      |
| 44 | Personality disorder      | psydx_pd_24      |
| 45 | Personality disorder      | psydx_pd_36      |
| 46 | Personality disorder      | psydx_pd_48      |
| 47 | Personality disorder      | psydx_pd_48      |
| 48 |                           |                  |
| 49 |                           |                  |
| 50 |                           |                  |
| 51 |                           |                  |
| 52 |                           |                  |
| 53 |                           |                  |
| 54 |                           |                  |
| 55 |                           |                  |
| 56 |                           |                  |
| 57 |                           |                  |
| 58 |                           |                  |
| 59 |                           |                  |
| 60 |                           |                  |

|                      |               |
|----------------------|---------------|
| Personality disorder | psydx_pd_60   |
| ADHD                 | psydx_adhd_3  |
| ADHD                 | psydx_adhd_6  |
| ADHD                 | psydx_adhd_12 |
| ADHD                 | psydx_adhd_24 |
| ADHD                 | psydx_adhd_36 |
| ADHD                 | psydx_adhd_48 |
| ADHD                 | psydx_adhd_60 |
| Other diagnosis      | psydx_otr_3   |
| Other diagnosis      | psydx_otr_6   |
| Other diagnosis      | psydx_otr_12  |
| Other diagnosis      | psydx_otr_24  |
| Other diagnosis      | psydx_otr_36  |
| Other diagnosis      | psydx_otr_48  |
| Other diagnosis      | psydx_otr_60  |

## ii. PHARMACOLOGICAL TREATMENTS FOR MENTAL HEALTH DISORDERS

- Typical antipsychotics
- Atypical antipsychotics
- Clozapine
- Antidepressant for anxiety or depression
- Antidepressants for other reasons
- Mood stabilizer
- Anxiolytic
- ADHD medication

| <b>derived variables<sup>5</sup></b> | <b>variable name</b>     |
|--------------------------------------|--------------------------|
| Typical antipsychotics               | rx_psy_antipsych_typ_3   |
| Typical antipsychotics               | rx_psy_antipsych_typ_6   |
| Typical antipsychotics               | rx_psy_antipsych_typ_12  |
| Typical antipsychotics               | rx_psy_antipsych_typ_24  |
| Typical antipsychotics               | rx_psy_antipsych_typ_36  |
| Typical antipsychotics               | rx_psy_antipsych_typ_48  |
| Typical antipsychotics               | rx_psy_antipsych_typ_60  |
| Atypical antipsychotics              | rx_psy_antipsych_atyp_3  |
| Atypical antipsychotics              | rx_psy_antipsych_atyp_6  |
| Atypical antipsychotics              | rx_psy_antipsych_atyp_12 |
| Atypical antipsychotics              | rx_psy_antipsych_atyp_24 |
| Atypical antipsychotics              | rx_psy_antipsych_atyp_36 |
| Atypical antipsychotics              | rx_psy_antipsych_atyp_48 |

|    |                                          |                          |
|----|------------------------------------------|--------------------------|
| 1  |                                          |                          |
| 2  |                                          |                          |
| 3  | Atypical antipsychotics                  | rx_psy_antipsych_atyp_60 |
| 4  | Clozapine                                | rx_psy_clozapine_3       |
| 5  | Clozapine                                | rx_psy_clozapine_6       |
| 6  | Clozapine                                | rx_psy_clozapine_12      |
| 7  | Clozapine                                | rx_psy_clozapine_24      |
| 8  | Clozapine                                | rx_psy_clozapine_36      |
| 9  | Clozapine                                | rx_psy_clozapine_48      |
| 10 | Clozapine                                | rx_psy_clozapine_60      |
| 11 | antidepressant for anxiety or depression | rx_psy_antidep_anxdep_3  |
| 12 | antidepressant for anxiety or depression | rx_psy_antidep_anxdep_6  |
| 13 | antidepressant for anxiety or depression | rx_psy_antidep_anxdep_12 |
| 14 | antidepressant for anxiety or depression | rx_psy_antidep_anxdep_24 |
| 15 | antidepressant for anxiety or depression | rx_psy_antidep_anxdep_36 |
| 16 | antidepressant for anxiety or depression | rx_psy_antidep_anxdep_48 |
| 17 | antidepressant for anxiety or depression | rx_psy_antidep_anxdep_60 |
| 18 | antidepressant for other reasons         | rx_psy_antidep_otr_3     |
| 19 | Antidepressant for other reasons         | rx_psy_antidep_otr_6     |
| 20 | Antidepressant for other reasons         | rx_psy_antidep_otr_12    |
| 21 | Antidepressant for other reasons         | rx_psy_antidep_otr_24    |
| 22 | Antidepressant for other reasons         | rx_psy_antidep_otr_36    |
| 23 | Antidepressant for other reasons         | rx_psy_antidep_otr_48    |
| 24 | Antidepressant for other reasons         | rx_psy_antidep_otr_60    |
| 25 | mood stabilizer                          | rx_psy_mdestb_3          |
| 26 | mood stabilizer                          | rx_psy_mdestb_6          |
| 27 | mood stabilizer                          | rx_psy_mdestb_12         |
| 28 | mood stabilizer                          | rx_psy_mdestb_24         |
| 29 | mood stabilizer                          | rx_psy_mdestb_36         |
| 30 | mood stabilizer                          | rx_psy_mdestb_48         |
| 31 | mood stabilizer                          | rx_psy_mdestb_60         |
| 32 | anxiolytics                              | rx_psy_anx_3             |
| 33 | anxiolytics                              | rx_psy_anx_6             |
| 34 | anxiolytics                              | rx_psy_anx_12            |
| 35 | anxiolytics                              | rx_psy_anx_24            |
| 36 | anxiolytics                              | rx_psy_anx_36            |
| 37 | anxiolytics                              | rx_psy_anx_48            |
| 38 | anxiolytics                              | rx_psy_anx_60            |
| 39 | ADHD medication                          | rx_psy_adhd_3            |
| 40 | ADHD medication                          | rx_psy_adhd_6            |
| 41 | ADHD medication                          | rx_psy_adhd_12           |
| 42 | ADHD medication                          | rx_psy_adhd_24           |
| 43 | ADHD medication                          | rx_psy_adhd_36           |
| 44 |                                          |                          |
| 45 |                                          |                          |
| 46 |                                          |                          |
| 47 |                                          |                          |
| 48 |                                          |                          |
| 49 |                                          |                          |
| 50 |                                          |                          |
| 51 |                                          |                          |
| 52 |                                          |                          |
| 53 |                                          |                          |
| 54 |                                          |                          |
| 55 |                                          |                          |
| 56 |                                          |                          |
| 57 |                                          |                          |
| 58 |                                          |                          |
| 59 |                                          |                          |
| 60 |                                          |                          |

|                 |                |
|-----------------|----------------|
| ADHD medication | rx_psy_adhd_48 |
| ADHD medication | rx_psy_adhd_60 |

### iii. NON-PHARMACOLOGICAL TREATMENTS FOR MENTAL HEALTH DISORDERS

- duration of hospitalisations for mental health reasons (continuous, sum of days)
- number of hospitalisations for mental health reasons (continuous)
- duration of hospitalisations for suicide attempt (continuous, sum of days)
- number of hospitalisations for suicide attempt (continuous)
- Number of care center visits for mental health reasons (continuous)
- number of general practitioner visits for mental health reasons (continuous)
- number of emergency room visits for mental health reasons (continuous)
- number of outpatient psychiatrist visits (continuous)
- number of other specialist visits for mental health reasons (continuous)
- number of psychotherapy visits with a psychiatrist (continuous)
- number of psychotherapy visits with a general practitioner (continuous)
- number of psychotherapy visits with another specialist (continuous)
- Number of outpatient paediatrician visits (continuous)
- No mental health services
- number of ECT treatments received (continuous)
- Acute ECT received (dichotomous)
- Maintenance ECT received (dichotomous)

| derived variables                                      | variable name            |
|--------------------------------------------------------|--------------------------|
| Duration of hospit for suicide attempt (conti, # days) | duration_hosp_suicide_3  |
| duration of hospit for suicide attempt (conti, # days) | duration_hosp_suicide_6  |
| duration of hospit for suicide attempt (conti, # days) | duration_hosp_suicide_12 |
| duration of hospit for suicide attempt (conti, # days) | duration_hosp_suicide_24 |
| duration of hospit for suicide attempt (conti, # days) | duration_hosp_suicide_36 |
| duration of hospit for suicide attempt (conti, # days) | duration_hosp_suicide_48 |
| duration of hospit for suicide attempt (conti, # days) | duration_hosp_suicide_60 |
| # of hospit for suicide attempt (continuous)           | #_hosp_suicide_3         |
| # of hospit for suicide attempt (continuous)           | #_hosp_suicide_6         |
| # of hospit for suicide attempt (continuous)           | #_hosp_suicide_12        |
| # of hospit for suicide attempt (continuous)           | #_hosp_suicide_24        |
| # of hospit for suicide attempt (continuous)           | #_hosp_suicide_36        |
| # of hospit for suicide attempt (continuous)           | #_hosp_suicide_48        |
| # of hospit for suicide attempt (continuous)           | #_hosp_suicide_60        |
| Duration of hospit for mh reasons (conti, # of days)   | Duration_hosp_mh_3       |
| Duration of hospit for mh reasons (conti, # of days)   | Duration_hosp_mh_6       |
| Duration of hospit for mh reasons (conti, # of days)   | Duration_hosp_mh_12      |
| Duration of hospit for mh reasons (conti, # of days)   | Duration_hosp_mh_24      |
| Duration of hospit for mh reasons (conti, # of days)   | Duration_hosp_mh_36      |
| Duration of hospit for mh reasons (conti, # of days)   | Duration_hosp_mh_48      |
| Duration of hospit for mh reasons (conti, # of days)   | Duration_hosp_mh_60      |

|    |                                                              |                         |
|----|--------------------------------------------------------------|-------------------------|
| 1  |                                                              |                         |
| 2  |                                                              |                         |
| 3  | # of hospit for mh reasons (continuous)                      | #_hosp_mh_3             |
| 4  | # of hospit for mh reasons (continuous)                      | #_hosp_mh_6             |
| 5  | # of hospit for mh reasons (continuous)                      | #_hosp_mh_12            |
| 6  | # of hospit for mh reasons (continuous)                      | #_hosp_mh_24            |
| 7  | # of hospit for mh reasons (continuous)                      | #_hosp_mh_36            |
| 8  | # of hospit for mh reasons (continuous)                      | #_hosp_mh_48            |
| 9  | # of hospit for mh reasons (continuous)                      | #_hosp_mh_60            |
| 10 | # of hospit for mh reasons (continuous)                      | #_hosp_mh_60            |
| 11 | # of outpatient paediatrician visits (continuous)            | #_outpat_pediatician_3  |
| 12 | # of outpatient paediatrician visits (continuous)            | #_outpat_pediatician_6  |
| 13 | # of outpatient paediatrician visits (continuous)            | #_outpat_pediatician_12 |
| 14 | # of outpatient paediatrician visits (continuous)            | #_outpat_pediatician_24 |
| 15 | # of outpatient paediatrician visits (continuous)            | #_outpat_pediatician_36 |
| 16 | # of outpatient paediatrician visits (continuous)            | #_outpat_pediatician_48 |
| 17 | # of outpatient paediatrician visits (continuous)            | #_outpat_pediatician_60 |
| 18 | # of outpatient paediatrician visits (continuous)            | #_outpat_pediatician_60 |
| 19 | Number of Care center for mental health reasons (continuous) | #_Carectr_mh_3          |
| 20 | Number of Care center for mental health reasons (continuous) | #_Carectr_mh_6          |
| 21 | Number of Care center for mental health reasons (continuous) | #_Carectr_mh_12         |
| 22 | Number of Care center for mental health reasons (continuous) | #_Carectr_mh_24         |
| 23 | Number of Care center for mental health reasons (continuous) | #_Carectr_mh_36         |
| 24 | Number of Care center for mental health reasons (continuous) | #_Carectr_mh_48         |
| 25 | Number of Care center for mental health reasons (continuous) | #_Carectr_mh_60         |
| 26 | Number of Care center for mental health reasons (continuous) | #_Carectr_mh_60         |
| 27 | # of emergency visits for mh reasons (continuous)            | #_ER_mh_3               |
| 28 | # of emergency visits for mh reasons (continuous)            | #_ER_mh_6               |
| 29 | # of emergency visits for mh reasons (continuous)            | #_ER_mh_12              |
| 30 | # of emergency visits for mh reasons (continuous)            | #_ER_mh_24              |
| 31 | # of emergency visits for mh reasons (continuous)            | #_ER_mh_36              |
| 32 | # of emergency visits for mh reasons (continuous)            | #_ER_mh_48              |
| 33 | # of emergency visits for mh reasons (continuous)            | #_ER_mh_60              |
| 34 | # of emergency visits for mh reasons (continuous)            | #_ER_mh_60              |
| 35 | # of GP visits for mh reasons (continuous)                   | #_gp_mh_3               |
| 36 | # of GP visits for mh reasons (continuous)                   | #_gp_mh_6               |
| 37 | # of GP visits for mh reasons (continuous)                   | #_gp_mh_12              |
| 38 | # of GP visits for mh reasons (continuous)                   | #_gp_mh_24              |
| 39 | # of GP visits for mh reasons (continuous)                   | #_gp_mh_36              |
| 40 | # of GP visits for mh reasons (continuous)                   | #_gp_mh_48              |
| 41 | # of GP visits for mh reasons (continuous)                   | #_gp_mh_60              |
| 42 | # of GP visits for mh reasons (continuous)                   | #_gp_mh_60              |
| 43 | # of outpatient psychiatrist visits (continuous)             | #_psy_mh_3              |
| 44 | # of outpatient psychiatrist visits (continuous)             | #_psy_mh_6              |
| 45 | # of outpatient psychiatrist visits (continuous)             | #_psy_mh_12             |
| 46 | # of outpatient psychiatrist visits (continuous)             | #_psy_mh_24             |
| 47 | # of outpatient psychiatrist visits (continuous)             | #_psy_mh_36             |
| 48 | # of outpatient psychiatrist visits (continuous)             | #_psy_mh_48             |
| 49 | # of outpatient psychiatrist visits (continuous)             | #_psy_mh_48             |
| 50 |                                                              |                         |
| 51 |                                                              |                         |
| 52 |                                                              |                         |
| 53 |                                                              |                         |
| 54 |                                                              |                         |
| 55 |                                                              |                         |
| 56 |                                                              |                         |
| 57 |                                                              |                         |
| 58 |                                                              |                         |
| 59 |                                                              |                         |
| 60 |                                                              |                         |

|                                                         |                     |
|---------------------------------------------------------|---------------------|
| # of outpatient psychiatrist visits (continuous)        | #_psy_mh_60         |
| # of psychotherapy visits with a psychiatrist (conti)   | #_psychotx_psy_3    |
| # of psychotherapy visits with a psychiatrist (conti)   | #_psychotx_psy_6    |
| # of psychotherapy visits with a psychiatrist (conti)   | #_psychotx_psy_12   |
| # of psychotherapy visits with a psychiatrist (conti)   | #_psychotx_psy_24   |
| # of psychotherapy visits with a psychiatrist (conti)   | #_psychotx_psy_36   |
| # of psychotherapy visits with a psychiatrist (conti)   | #_psychotx_psy_48   |
| # of psychotherapy visits with a psychiatrist (conti)   | #_psychotx_psy_60   |
| # of other specialist visits for mh reasons (conti)     | #_spc_mh_3          |
| # of other specialist visits for mh reasons (conti)     | #_spc_mh_6          |
| # of other specialist visits for mh reasons (conti)     | #_spc_mh_12         |
| # of other specialist visits for mh reasons (conti)     | #_spc_mh_24         |
| # of other specialist visits for mh reasons (conti)     | #_spc_mh_36         |
| # of other specialist visits for mh reasons (conti)     | #_spc_mh_48         |
| # of other specialist visits for mh reasons (conti)     | #_spc_mh_60         |
| # of psychotherapy visits with a GP (conti)             | #_psychotx_gp_3     |
| # of psychotherapy visits with a GP (conti)             | #_psychotx_gp_6     |
| # of psychotherapy visits with a GP (conti)             | #_psychotx_gp_12    |
| # of psychotherapy visits with a GP (conti)             | #_psychotx_gp_24    |
| # of psychotherapy visits with a GP (conti)             | #_psychotx_gp_36    |
| # of psychotherapy visits with a GP (conti)             | #_psychotx_gp_48    |
| # of psychotherapy visits with a GP (conti)             | #_psychotx_gp_60    |
| # of psychotherapy visits with other specialist (conti) | #_psychotx_other_3  |
| # of psychotherapy visits with other specialist (conti) | #_psychotx_other_6  |
| # of psychotherapy visits with other specialist (conti) | #_psychotx_other_12 |
| # of psychotherapy visits with other specialist (conti) | #_psychotx_other_24 |
| # of psychotherapy visits with other specialist (conti) | #_psychotx_other_36 |
| # of psychotherapy visits with other specialist (conti) | #_psychotx_other_48 |
| # of psychotherapy visits with other specialist (conti) | #_psychotx_other_60 |
| No mental health services                               | No_mh_services_3    |
| No mental health services                               | No_mh_services_6    |
| No mental health services                               | No_mh_services_12   |
| No mental health services                               | No_mh_services_24   |
| No mental health services                               | No_mh_services_36   |
| No mental health services                               | No_mh_services_48   |
| No mental health services                               | No_mh_services_60   |
| number of ECT received (continuous)                     | ECT_#_3             |
| number of ECT received (continuous)                     | ECT_#_6             |
| number of ECT received (continuous)                     | ECT_#_12            |
| number of ECT received (continuous)                     | ECT_#_24            |
| number of ECT received (continuous)                     | ECT_#_36            |

|                                     |                    |
|-------------------------------------|--------------------|
| number of ECT received (continuous) | ECT_#_48           |
| number of ECT received (continuous) | ECT_#_60           |
| acute ECT (dichotomous)             | ECT_acute_3        |
| acute ECT (dichotomous)             | ECT_acute_6        |
| acute ECT (dichotomous)             | ECT_acute_12       |
| acute ECT (dichotomous)             | ECT_acute_24       |
| acute ECT (dichotomous)             | ECT_acute_36       |
| acute ECT (dichotomous)             | ECT_acute_48       |
| acute ECT (dichotomous)             | ECT_acute_60       |
| Maintenance ECT (dichotomous)       | ECT_maintenance_3  |
| Maintenance ECT (dichotomous)       | ECT_maintenance_6  |
| Maintenance ECT (dichotomous)       | ECT_maintenance_12 |
| Maintenance ECT (dichotomous)       | ECT_maintenance_24 |
| Maintenance ECT (dichotomous)       | ECT_maintenance_36 |
| Maintenance ECT (dichotomous)       | ECT_maintenance_48 |
| Maintenance ECT (dichotomous)       | ECT_maintenance_60 |

#### iv. PHYSICAL DIAGNOSIS

- Dementia
- Neurological disease
- Endocrine system disorder
- Trauma
- Respiratory disorder
- Infectious disease
- Digestive disorder
- Cardiovascular disorder
- Cancer
- Other physical disorder
- Charlson/elixhauser index with psy (continuous)<sup>6</sup>
- Charlson/elixhauser index without psy (continuous)

| <b>derived variables</b> | <b>variable name</b> |
|--------------------------|----------------------|
| dementia                 | physdx_dem_3         |
| dementia                 | physdx_dem_6         |
| dementia                 | physdx_dem_12        |
| dementia                 | physdx_dem_24        |
| dementia                 | physdx_dem_36        |
| dementia                 | physdx_dem_48        |
| dementia                 | physdx_dem_60        |
| neurological disease     | physdx_neuro_3       |
| neurological disease     | physdx_neuro_6       |

|    |                           |                  |
|----|---------------------------|------------------|
| 1  |                           |                  |
| 2  |                           |                  |
| 3  | neurological disease      | physdx_neuro_12  |
| 4  | neurological disease      | physdx_neuro_24  |
| 5  | neurological disease      | physdx_neuro_36  |
| 6  | neurological disease      | physdx_neuro_48  |
| 7  | neurological disease      | physdx_neuro_60  |
| 8  | endocrine system disorder | physdx_endo_3    |
| 9  | endocrine system disorder | physdx_endo_6    |
| 10 | endocrine system disorder | physdx_endo_12   |
| 11 | endocrine system disorder | physdx_endo_24   |
| 12 | endocrine system disorder | physdx_endo_36   |
| 13 | endocrine system disorder | physdx_endo_48   |
| 14 | endocrine system disorder | physdx_endo_60   |
| 15 | trauma                    | physdx_trauma_3  |
| 16 | trauma                    | physdx_trauma_6  |
| 17 | trauma                    | physdx_trauma_12 |
| 18 | trauma                    | physdx_trauma_24 |
| 19 | trauma                    | physdx_trauma_36 |
| 20 | trauma                    | physdx_trauma_48 |
| 21 | trauma                    | physdx_trauma_60 |
| 22 | respiratory disorder      | physdx_resp_3    |
| 23 | respiratory disorder      | physdx_resp_6    |
| 24 | respiratory disorder      | physdx_resp_12   |
| 25 | respiratory disorder      | physdx_resp_24   |
| 26 | respiratory disorder      | physdx_resp_36   |
| 27 | respiratory disorder      | physdx_resp_48   |
| 28 | respiratory disorder      | physdx_resp_60   |
| 29 | infectious disease        | physdx_infec_3   |
| 30 | infectious disease        | physdx_infec_6   |
| 31 | infectious disease        | physdx_infec_12  |
| 32 | infectious disease        | physdx_infec_24  |
| 33 | infectious disease        | physdx_infec_36  |
| 34 | infectious disease        | physdx_infec_48  |
| 35 | infectious disease        | physdx_infec_60  |
| 36 | digestive disorder        | physdx_diges_3   |
| 37 | digestive disorder        | physdx_diges_6   |
| 38 | digestive disorder        | physdx_diges_12  |
| 39 | digestive disorder        | physdx_diges_24  |
| 40 | digestive disorder        | physdx_diges_36  |
| 41 | digestive disorder        | physdx_diges_48  |
| 42 | digestive disorder        | physdx_diges_60  |
| 43 | cardiovascular disorder   | physdx_cvd_3     |
| 44 |                           |                  |
| 45 |                           |                  |
| 46 |                           |                  |
| 47 |                           |                  |
| 48 |                           |                  |
| 49 |                           |                  |
| 50 |                           |                  |
| 51 |                           |                  |
| 52 |                           |                  |
| 53 |                           |                  |
| 54 |                           |                  |
| 55 |                           |                  |
| 56 |                           |                  |
| 57 |                           |                  |
| 58 |                           |                  |
| 59 |                           |                  |
| 60 |                           |                  |



|    |                                               |                                  |
|----|-----------------------------------------------|----------------------------------|
| 1  |                                               |                                  |
| 2  |                                               |                                  |
| 3  | cardiovascular disorder                       | physdx_cvd_6                     |
| 4  | cardiovascular disorder                       | physdx_cvd_12                    |
| 5  | cardiovascular disorder                       | physdx_cvd_24                    |
| 6  | cardiovascular disorder                       | physdx_cvd_36                    |
| 7  | cardiovascular disorder                       | physdx_cvd_48                    |
| 8  | cardiovascular disorder                       | physdx_cvd_60                    |
| 9  | cardiovascular disorder                       | physdx_cvd_60                    |
| 10 | cardiovascular disorder                       | physdx_cvd_60                    |
| 11 | cancer                                        | physdx_cncr_3                    |
| 12 | cancer                                        | physdx_cncr_6                    |
| 13 | cancer                                        | physdx_cncr_12                   |
| 14 | cancer                                        | physdx_cncr_12                   |
| 15 | cancer                                        | physdx_cncr_24                   |
| 16 | cancer                                        | physdx_cncr_36                   |
| 17 | cancer                                        | physdx_cncr_36                   |
| 18 | cancer                                        | physdx_cncr_48                   |
| 19 | cancer                                        | physdx_cncr_60                   |
| 20 | other physical disorders                      | physdx_otr_3                     |
| 21 | other physical disorders                      | physdx_otr_6                     |
| 22 | other physical disorders                      | physdx_otr_12                    |
| 23 | other physical disorders                      | physdx_otr_12                    |
| 24 | other physical disorders                      | physdx_otr_24                    |
| 25 | other physical disorders                      | physdx_otr_36                    |
| 26 | other physical disorders                      | physdx_otr_36                    |
| 27 | other physical disorders                      | physdx_otr_48                    |
| 28 | other physical disorders                      | physdx_otr_48                    |
| 29 | other physical disorders                      | physdx_otr_60                    |
| 30 | charlson/elixhauser index with psy (conti)    | physdx_comorbidity_withpsy_3     |
| 31 | charlson/elixhauser index with psy (conti)    | physdx_comorbidity_withpsy_3     |
| 32 | charlson/elixhauser index with psy (conti)    | physdx_comorbid_withpsy_6        |
| 33 | charlson/elixhauser index with psy (conti)    | physdx_comorbidity_withpsy_12    |
| 34 | charlson/elixhauser index with psy (conti)    | physdx_comorbidity_withpsy_12    |
| 35 | charlson/elixhauser index with psy (conti)    | physdx_comorbidity_withpsy_24    |
| 36 | charlson/elixhauser index with psy (conti)    | physdx_comorbidity_withpsy_24    |
| 37 | charlson/elixhauser index with psy (conti)    | physdx_comorbidity_withpsy_36    |
| 38 | charlson/elixhauser index with psy (conti)    | physdx_comorbidity_withpsy_36    |
| 39 | charlson/elixhauser index with psy (conti)    | physdx_comorbidity_withpsy_48    |
| 40 | charlson/elixhauser index with psy (conti)    | physdx_comorbidity_withpsy_48    |
| 41 | charlson/elixhauser index with psy (conti)    | physdx_comorbidity_withpsy_60    |
| 42 | charlson/elixhauser index with psy (conti)    | physdx_comorbidity_withpsy_60    |
| 43 | charlson/elixhauser index without psy (conti) | physdx_comorbidity_withoutpsy_3  |
| 44 | charlson/elixhauser index without psy (conti) | physdx_comorbidity_withoutpsy_3  |
| 45 | charlson/elixhauser index without psy (conti) | physdx_comorbid_withoutpsy_6     |
| 46 | charlson/elixhauser index without psy (conti) | physdx_comorbid_withoutpsy_6     |
| 47 | charlson/elixhauser index without psy (conti) | physdx_comorbidity_withoutpsy_12 |
| 48 | charlson/elixhauser index without psy (conti) | physdx_comorbidity_withoutpsy_12 |
| 49 | charlson/elixhauser index without psy (conti) | physdx_comorbidity_withoutpsy_24 |
| 50 | charlson/elixhauser index without psy (conti) | physdx_comorbidity_withoutpsy_24 |
| 51 | charlson/elixhauser index without psy (conti) | physdx_comorbidity_withoutpsy_36 |
| 52 | charlson/elixhauser index without psy (conti) | physdx_comorbidity_withoutpsy_36 |
| 53 | charlson/elixhauser index without psy (conti) | physdx_comorbidity_withoutpsy_36 |
| 54 | charlson/elixhauser index without psy (conti) | physdx_comorbidity_withoutpsy_36 |
| 55 |                                               |                                  |
| 56 |                                               |                                  |
| 57 |                                               |                                  |
| 58 |                                               |                                  |
| 59 |                                               |                                  |
| 60 |                                               |                                  |

|                                               |                                  |
|-----------------------------------------------|----------------------------------|
| charlson/elixhauser index without psy (conti) | physdx_comorbidity_withoutpsy_48 |
| charlson/elixhauser index without psy (conti) | physdx_comorbidity_withoutpsy_60 |

#### V. PHARMACOLOGICAL TREATMENTS FOR PHYSICAL HEALTH DISORDERS

- Medication for diabetes
- Medication for cardiovascular disease
- Medication for respiratory diseases
- Medication for gastro-intestinal disorder
- Anti-infective agent
- Pain medication
- Contraceptive
- Other medication

| derived variables                         | variable name       |
|-------------------------------------------|---------------------|
| medication for diabetes                   | rx_phys_diabetes_3  |
| medication for diabetes                   | rx_phys_diabetes_6  |
| medication for diabetes                   | rx_phys_diabetes_12 |
| medication for diabetes                   | rx_phys_diabetes_24 |
| medication for diabetes                   | rx_phys_diabetes_36 |
| medication for diabetes                   | rx_phys_diabetes_48 |
| medication for diabetes                   | rx_phys_diabetes_60 |
| medication for cardiovascular disease     | rx_phys_cvd_3       |
| medication for cardiovascular disease     | rx_phys_cvd_6       |
| medication for cardiovascular disease     | rx_phys_cvd_12      |
| medication for cardiovascular disease     | rx_phys_cvd_24      |
| medication for cardiovascular disease     | rx_phys_cvd_36      |
| medication for cardiovascular disease     | rx_phys_cvd_48      |
| medication for cardiovascular disease     | rx_phys_cvd_60      |
| medication for respiratory disease        | rx_phys_resp_3      |
| medication for respiratory disease        | rx_phys_resp_6      |
| medication for respiratory disease        | rx_phys_resp_12     |
| medication for respiratory disease        | rx_phys_resp_24     |
| medication for respiratory disease        | rx_phys_resp_36     |
| medication for respiratory disease        | rx_phys_resp_48     |
| medication for respiratory disease        | rx_phys_resp_60     |
| medication for gastro-intestinal disorder | rx_phys_gi_3        |
| medication for gastro-intestinal disorder | rx_phys_gi_6        |
| medication for gastro-intestinal disorder | rx_phys_gi_12       |
| medication for gastro-intestinal disorder | rx_phys_gi_24       |
| medication for gastro-intestinal disorder | rx_phys_gi_36       |
| medication for gastro-intestinal disorder | rx_phys_gi_48       |

|                                           |                      |
|-------------------------------------------|----------------------|
| medication for gastro-intestinal disorder | rx_phys_gi_60        |
| anti-infective agents                     | rx_phys_antiinfec_3  |
| anti-infective agents                     | rx_phys_antiinfec_6  |
| anti-infective agents                     | rx_phys_antiinfec_12 |
| anti-infective agents                     | rx_phys_antiinfec_24 |
| anti-infective agents                     | rx_phys_antiinfec_36 |
| anti-infective agents                     | rx_phys_antiinfec_48 |
| anti-infective agents                     | rx_phys_antiinfec_60 |
| pain medication                           | rx_phys_pain_3       |
| pain medication                           | rx_phys_pain_6       |
| pain medication                           | rx_phys_pain_12      |
| pain medication                           | rx_phys_pain_24      |
| pain medication                           | rx_phys_pain_36      |
| pain medication                           | rx_phys_pain_48      |
| pain medication                           | rx_phys_pain_60      |
| contraceptives                            | rx_phys_contracep_3  |
| contraceptives                            | rx_phys_contracep_6  |
| contraceptives                            | rx_phys_contracep_12 |
| contraceptives                            | rx_phys_contracep_24 |
| contraceptives                            | rx_phys_contracep_36 |
| contraceptives                            | rx_phys_contracep_48 |
| contraceptives                            | rx_phys_contracep_60 |
| other medication                          | rx_phys_otr_3        |
| other medication                          | rx_phys_otr_6        |
| other medication                          | rx_phys_otr_12       |
| other medication                          | rx_phys_otr_24       |
| other medication                          | rx_phys_otr_36       |
| other medication                          | rx_phys_otr_48       |
| other medication                          | rx_phys_otr_60       |

vi. NON-PHARMACOLOGICAL TREATMENTS FOR PHYSICAL HEALTH DISORDERS

- duration of hospitalisations for physical health reasons (continuous, sum of days)
- number of hospitalisations for physical health reasons (continuous)
- care center visits/plays for physical health reasons\*
- number of general practitioner visits for physical reasons (continuous)\*
- number of emergency room visits for physical reasons (continuous)\*
- number of outpatient specialist visits for physical health reasons (continuous)\*
- number of outpatient paediatrician visits (continuous)\*

| derived variables                                      | variable name         |
|--------------------------------------------------------|-----------------------|
| Duration of hospit for phys reasons (conti, # of days) | Duration_hosp_phys_3  |
| Duration of hospit for phys reasons (conti, # of days) | Duration_hosp_phys_6  |
| Duration of hospit for phys reasons (conti, # of days) | Duration_hosp_phys_12 |

|                                                          |                       |
|----------------------------------------------------------|-----------------------|
| Duration of hospit for phys reasons (conti, # of days)   | Duration_hosp_phys_24 |
| Duration of hospit for phys reasons (conti, # of days)   | Duration_hosp_phys_36 |
| Duration of hospit for phys reasons (conti, # of days)   | Duration_hosp_phys_48 |
| Duration of hospit for phys reasons (conti, # of days)   | Duration_hosp_phys_60 |
| # of hospit for phys reasons (continuous)                | #_hosp_phys_3         |
| # of hospit for phys reasons (continuous)                | #_hosp_phys_6         |
| # of hospit for phys reasons (continuous)                | #_hosp_phys_12        |
| # of hospit for phys reasons (continuous)                | #_hosp_phys_24        |
| # of hospit for phys reasons (continuous)                | #_hosp_phys_36        |
| # of hospit for phys reasons (continuous)                | #_hosp_phys_48        |
| # of hospit for phys reasons (continuous)                | #_hosp_phys_60        |
| Care center for physical health reasons                  | Carectr_phys_3        |
| Care center for physical health reasons                  | Carectr_phys_6        |
| Care center for physical health reasons                  | Carectr_phys_12       |
| Care center for physical health reasons                  | Carectr_phys_24       |
| Care center for physical health reasons                  | Carectr_phys_36       |
| Care center for physical health reasons                  | Carectr_phys_48       |
| Care center for physical health reasons                  | Carectr_phys_60       |
| # of outpatient specialist visit for phys reasons (cont) | #_spc_phys_3          |
| # of outpatient specialist visit for phys reasons (cont) | #_spc_phys_6          |
| # of outpatient specialist visit for phys reasons (cont) | #_spc_phys_12         |
| # of outpatient specialist visit for phys reasons (cont) | #_spc_phys_24         |
| # of outpatient specialist visit for phys reasons (cont) | #_spc_phys_36         |
| # of outpatient specialist visit for phys reasons (cont) | #_spc_phys_48         |
| # of outpatient specialist visit for phys reasons (cont) | #_spc_phys_60         |
| # of GP visits for phys reasons (continuous)             | #_gp_phys_3           |
| # of GP visits for phys reasons (continuous)             | #_gp_phys_6           |
| # of GP visits for phys reasons (continuous)             | #_gp_phys_12          |
| # of GP visits for phys reasons (continuous)             | #_gp_phys_24          |
| # of GP visits for phys reasons (continuous)             | #_gp_phys_36          |
| # of GP visits for phys reasons (continuous)             | #_gp_phys_48          |
| # of GP visits for phys reasons (continuous)             | #_gp_phys_60          |
| # of emergency visits for phys reasons (continuous)      | #_ER_phys_3           |
| # of emergency visits for phys reasons (continuous)      | #_ER_phys_6           |
| # of emergency visits for phys reasons (continuous)      | #_ER_phys_12          |
| # of emergency visits for phys reasons (continuous)      | #_ER_phys_24          |
| # of emergency visits for phys reasons (continuous)      | #_ER_phys_36          |
| # of emergency visits for phys reasons (continuous)      | #_ER_phys_48          |
| # of emergency visits for phys reasons (continuous)      | #_ER_phys_60          |

#### vii. INDIVIDUAL SOCIO-DEMOGRAPHIC VARIABLES

- Age (continuous)
- age group: 15-24
- age group: 25-34
- age group: 35-44
- age group: 45-54

- age group: 55-64
- age group: 65-74
- age group: 75-84
- age group: ≥85
- Sex
- Location – rural
- Location – non-rural
- Location – missing data
- rss 01 bas saint-laurent
- rss 02 saguenay-lac-saint-jean
- rss 03 capitale-nationale
- rss 04 mauricie et centre-du-québec
- rss 05 estrie
- rss 06 montréal
- rss 07 outaouais
- rss 08 abitibi-témiscamingue
- rss 09 côte-nord
- rss 10 nord-du-québec
- rss 11gaspésie-îles-de-la-madeleine
- rss 12 chaudière-appalaches
- rss 13 laval
- rss 14 lanaudière
- rss 15 laurentides
- rss 16 montérégie
- Adherence to the public drug plan (RAMQ) (dichotomous)

| derived variables        | variable name  |
|--------------------------|----------------|
| Age (continuous)         | Age_continuous |
| age group: 15-24         | age_15-24      |
| age group: 25-34         | age_25-34      |
| age group: 35-44         | age_35-44      |
| age group: 45-54         | age_45-54      |
| age group: 55-64         | age_55-64      |
| age group: 65-74         | age_65-74      |
| age group: 75-84         | age_75-84      |
| age group: ≥85           | age_85+        |
| sex male                 | sex_m          |
| sex female               | sex_f          |
| rss 01 bas-saint-laurent | loc_rss_01_3   |
| rss 01 bas-saint-laurent | loc_rss_01_6   |
| rss 01 bas-saint-laurent | loc_rss_01_12  |
| rss 01 bas-saint-laurent | loc_rss_01_24  |
| rss 01 bas-saint-laurent | loc_rss_01_36  |

|    |                                     |               |
|----|-------------------------------------|---------------|
| 1  |                                     |               |
| 2  |                                     |               |
| 3  |                                     |               |
| 4  | rss 01 bas-saint-laurent            | loc_rss_01_48 |
| 5  | rss 01 bas-saint-laurent            | loc_rss_01_60 |
| 6  | rss 02 saguenay-lac-saint-jean      | loc_rss_02_3  |
| 7  | rss 02 saguenay-lac-saint-jean      | loc_rss_02_6  |
| 8  | rss 02 saguenay-lac-saint-jean      | loc_rss_02_12 |
| 9  | rss 02 saguenay-lac-saint-jean      | loc_rss_02_24 |
| 10 | rss 02 saguenay-lac-saint-jean      | loc_rss_02_36 |
| 11 | rss 02 saguenay-lac-saint-jean      | loc_rss_02_48 |
| 12 | rss 02 saguenay-lac-saint-jean      | loc_rss_02_60 |
| 13 | rss 03 capitale-nationale           | loc_rss_03_3  |
| 14 | rss 03 capitale-nationale           | loc_rss_03_6  |
| 15 | rss 03 capitale-nationale           | loc_rss_03_12 |
| 16 | rss 03 capitale-nationale           | loc_rss_03_24 |
| 17 | rss 03 capitale-nationale           | loc_rss_03_36 |
| 18 | rss 03 capitale-nationale           | loc_rss_03_48 |
| 19 | rss 03 capitale-nationale           | loc_rss_03_60 |
| 20 | rss 04 mauricie et centre-du-québec | loc_rss_04_3  |
| 21 | rss 04 mauricie et centre-du-québec | loc_rss_04_6  |
| 22 | rss 04 mauricie et centre-du-québec | loc_rss_04_12 |
| 23 | rss 04 mauricie et centre-du-québec | loc_rss_04_24 |
| 24 | rss 04 mauricie et centre-du-québec | loc_rss_04_36 |
| 25 | rss 04 mauricie et centre-du-québec | loc_rss_04_48 |
| 26 | rss 04 mauricie et centre-du-québec | loc_rss_04_60 |
| 27 | rss 05 estrie                       | loc_rss_05_3  |
| 28 | rss 05 estrie                       | loc_rss_05_6  |
| 29 | rss 05 estrie                       | loc_rss_05_12 |
| 30 | rss 05 estrie                       | loc_rss_05_24 |
| 31 | rss 05 estrie                       | loc_rss_05_36 |
| 32 | rss 05 estrie                       | loc_rss_05_48 |
| 33 | rss 05 estrie                       | loc_rss_05_60 |
| 34 | rss 06 montréal                     | loc_rss_06_3  |
| 35 | rss 06 montréal                     | loc_rss_06_6  |
| 36 | rss 06 montréal                     | loc_rss_06_12 |
| 37 | rss 06 montréal                     | loc_rss_06_24 |
| 38 | rss 06 montréal                     | loc_rss_06_36 |
| 39 | rss 06 montréal                     | loc_rss_06_48 |
| 40 | rss 06 montréal                     | loc_rss_06_60 |
| 41 | rss 07 outaouais                    | loc_rss_07_3  |
| 42 | rss 07 outaouais                    | loc_rss_07_6  |
| 43 | rss 07 outaouais                    | loc_rss_07_12 |
| 44 | rss 07 outaouais                    | loc_rss_07_24 |
| 45 |                                     |               |
| 46 |                                     |               |
| 47 |                                     |               |
| 48 |                                     |               |
| 49 |                                     |               |
| 50 |                                     |               |
| 51 |                                     |               |
| 52 |                                     |               |
| 53 |                                     |               |
| 54 |                                     |               |
| 55 |                                     |               |
| 56 |                                     |               |
| 57 |                                     |               |
| 58 |                                     |               |
| 59 |                                     |               |
| 60 |                                     |               |

|    |                                      |               |
|----|--------------------------------------|---------------|
| 1  |                                      |               |
| 2  |                                      |               |
| 3  | rss 07 outaouais                     | loc_rss_07_36 |
| 4  | rss 07 outaouais                     | loc_rss_07_48 |
| 5  | rss 07 outaouais                     | loc_rss_07_60 |
| 6  | rss 07 outaouais                     | loc_rss_07_60 |
| 7  | 08 abitibi-témiscamingue             | loc_rss_08_3  |
| 8  | rss 08 abitibi-témiscamingue         | loc_rss_08_6  |
| 9  | rss 08 abitibi-témiscamingue         | loc_rss_08_12 |
| 10 | rss 08 abitibi-témiscamingue         | loc_rss_08_12 |
| 11 | rss 08 abitibi-témiscamingue         | loc_rss_08_24 |
| 12 | 08 abitibi-témiscamingue             | loc_rss_08_36 |
| 13 | rss 08 abitibi-témiscamingue         | loc_rss_08_48 |
| 14 | rss 08 abitibi-témiscamingue         | loc_rss_08_48 |
| 15 | rss 08 abitibi-témiscamingue         | loc_rss_08_60 |
| 16 | rss 09 côte-nord                     | loc_rss_09_3  |
| 17 | rss 09 côte-nord                     | loc_rss_09_6  |
| 18 | rss 09 côte-nord                     | loc_rss_09_6  |
| 19 | rss 09 côte-nord                     | loc_rss_09_12 |
| 20 | rss 09 côte-nord                     | loc_rss_09_12 |
| 21 | rss 09 côte-nord                     | loc_rss_09_24 |
| 22 | rss 09 côte-nord                     | loc_rss_09_36 |
| 23 | rss 09 côte-nord                     | loc_rss_09_36 |
| 24 | rss 09 côte-nord                     | loc_rss_09_48 |
| 25 | rss 09 côte-nord                     | loc_rss_09_60 |
| 26 | rss 10 nord-du-québec                | loc_rss_10_3  |
| 27 | rss 10 nord-du-québec                | loc_rss_10_6  |
| 28 | rss 10 nord-du-québec                | loc_rss_10_12 |
| 29 | rss 10 nord-du-québec                | loc_rss_10_12 |
| 30 | rss 10 nord-du-québec                | loc_rss_10_24 |
| 31 | rss 10 nord-du-québec                | loc_rss_10_36 |
| 32 | rss 10 nord-du-québec                | loc_rss_10_36 |
| 33 | rss 10 nord-du-québec                | loc_rss_10_48 |
| 34 | rss 10 nord-du-québec                | loc_rss_10_60 |
| 35 | rss 10 nord-du-québec                | loc_rss_10_60 |
| 36 | rss 11 gaspésie-îles-de-la-madeleine | loc_rss_11_3  |
| 37 | rss 11 gaspésie-îles-de-la-madeleine | loc_rss_11_6  |
| 38 | rss 11 gaspésie-îles-de-la-madeleine | loc_rss_11_12 |
| 39 | rss 11 gaspésie-îles-de-la-madeleine | loc_rss_11_12 |
| 40 | rss 11 gaspésie-îles-de-la-madeleine | loc_rss_11_24 |
| 41 | rss 11 gaspésie-îles-de-la-madeleine | loc_rss_11_36 |
| 42 | rss 11 gaspésie-îles-de-la-madeleine | loc_rss_11_36 |
| 43 | rss 11 gaspésie-îles-de-la-madeleine | loc_rss_11_48 |
| 44 | rss 11 gaspésie-îles-de-la-madeleine | loc_rss_11_60 |
| 45 | rss 12 chaudière-appalaches          | loc_rss_12_3  |
| 46 | rss 12 chaudière-appalaches          | loc_rss_12_6  |
| 47 | rss 12 chaudière-appalaches          | loc_rss_12_12 |
| 48 | rss 12 chaudière-appalaches          | loc_rss_12_12 |
| 49 | rss 12 chaudière-appalaches          | loc_rss_12_24 |
| 50 | rss 12 chaudière-appalaches          | loc_rss_12_36 |
| 51 | rss 12 chaudière-appalaches          | loc_rss_12_36 |
| 52 | rss 12 chaudière-appalaches          | loc_rss_12_48 |
| 53 | rss 12 chaudière-appalaches          | loc_rss_12_60 |
| 54 | rss 13 laval                         | loc_rss_13_3  |
| 55 | rss 13 laval                         | loc_rss_13_6  |
| 56 | rss 13 laval                         | loc_rss_13_12 |

|    |                       |               |
|----|-----------------------|---------------|
| 1  |                       |               |
| 2  |                       |               |
| 3  | rss 13 laval          | loc_rss_13_24 |
| 4  | rss 13 laval          | loc_rss_13_36 |
| 5  | rss 13 laval          | loc_rss_13_48 |
| 6  | rss 13 laval          | loc_rss_13_60 |
| 7  | rss 14 lanaudière     | loc_rss_14_3  |
| 8  | rss 14 lanaudière     | loc_rss_14_6  |
| 9  | rss 14 lanaudière     | loc_rss_14_12 |
| 10 | rss 14 lanaudière     | loc_rss_14_24 |
| 11 | rss 14 lanaudière     | loc_rss_14_36 |
| 12 | rss 14 lanaudière     | loc_rss_14_48 |
| 13 | rss 14 lanaudière     | loc_rss_14_60 |
| 14 | rss 15 laurentides    | loc_rss_15_3  |
| 15 | rss 15 laurentides    | loc_rss_15_6  |
| 16 | rss 15 laurentides    | loc_rss_15_12 |
| 17 | rss 15 laurentides    | loc_rss_15_24 |
| 18 | rss 15 laurentides    | loc_rss_15_36 |
| 19 | rss 15 laurentides    | loc_rss_15_48 |
| 20 | rss 15 laurentides    | loc_rss_15_60 |
| 21 | rss 16 montérégie     | loc_rss_16_3  |
| 22 | rss 16 montérégie     | loc_rss_16_6  |
| 23 | rss 16 montérégie     | loc_rss_16_12 |
| 24 | rss 16 montérégie     | loc_rss_16_24 |
| 25 | rss 16 montérégie     | loc_rss_16_36 |
| 26 | rss 16 montérégie     | loc_rss_16_48 |
| 27 | rss 16 montérégie     | loc_rss_16_60 |
| 28 | location nonrural     | nonrural_3    |
| 29 | location nonrural     | nonrural_6    |
| 30 | location nonrural     | nonrural_12   |
| 31 | location nonrural     | nonrural_24   |
| 32 | location nonrural     | nonrural_36   |
| 33 | location nonrural     | nonrural_48   |
| 34 | location nonrural     | nonrural_60   |
| 35 | location rural        | rural_3       |
| 36 | location rural        | rural_6       |
| 37 | location rural        | rural_12      |
| 38 | location rural        | rural_24      |
| 39 | location rural        | rural_36      |
| 40 | location rural        | rural_48      |
| 41 | location rural        | rural_60      |
| 42 | location missing data | loc_missing_3 |
| 43 | location missing data | loc_missing_6 |
| 44 |                       |               |
| 45 |                       |               |
| 46 |                       |               |
| 47 |                       |               |
| 48 |                       |               |
| 49 |                       |               |
| 50 |                       |               |
| 51 |                       |               |
| 52 |                       |               |
| 53 |                       |               |
| 54 |                       |               |
| 55 |                       |               |
| 56 |                       |               |
| 57 |                       |               |
| 58 |                       |               |
| 59 |                       |               |
| 60 |                       |               |



|                                          |                 |
|------------------------------------------|-----------------|
| location missing data                    | loc_missing_12  |
| location missing data                    | loc_missing_24  |
| location missing data                    | loc_missing_36  |
| location missing data                    | loc_missing_48  |
| location missing data                    | loc_missing_60  |
| adherence to the public drug plan (RAMQ) | PublicRxPlan_3  |
| adherence to the public drug plan (RAMQ) | PublicRxPlan_6  |
| adherence to the public drug plan (RAMQ) | PublicRxPlan_12 |
| adherence to the public drug plan (RAMQ) | PublicRxPlan_24 |
| adherence to the public drug plan (RAMQ) | PublicRxPlan_36 |
| adherence to the public drug plan (RAMQ) | PublicRxPlan_48 |
| adherence to the public drug plan (RAMQ) | PublicRxPlan_60 |

## ENVIRONMENTAL VARIABLES

### i. DEPRIVATION INDEX

- Material deprivation (from 1, least deprived to 5, most deprived)
- Social deprivation (from 1, least deprived to 5, most deprived)

| <b>derived variables<sup>7</sup></b> | <b>variable name</b> |
|--------------------------------------|----------------------|
| material deprivation (1-5)           | matdep_3             |
| material deprivation (1-5)           | matdep_6             |
| material deprivation (1-5)           | matdep_12            |
| material deprivation (1-5)           | matdep_24            |
| material deprivation (1-5)           | matdep_36            |
| material deprivation (1-5)           | matdep_48            |
| material deprivation (1-5)           | matdep_60            |
| social deprivation (1-5)             | socdep_3             |
| social deprivation (1-5)             | socdep_6             |
| social deprivation (1-5)             | socdep_12            |
| social deprivation (1-5)             | socdep_24            |
| social deprivation (1-5)             | socdep_36            |
| social deprivation (1-5)             | socdep_48            |
| social deprivation (1-5)             | socdep_60            |

## SYSTEM VARIABLES

### i. HEALTH SYSTEM ENVIRONMENT (HEALTH SYSTEM)

- Mental health budget

- Bas-Saint-Laurent
- Saguenay-Lac-Saint-Jean
- Capitale-Nationale
- Mauricie et Centre-du-Québec
- Estrie
- Montréal
- Outaouais
- Abitibi-Témiscamingue
- Côte-Nord
- Nord-du-Québec
- Gaspésie-îles-de-la-Madeleine
- Chaudière-Appalaches
- Laval
- Lanaudière
- Laurentides
- Montérégie
- Addictions budget
  - Bas-Saint-Laurent
  - Saguenay-Lac-Saint-Jean
  - Capitale-Nationale
  - Mauricie et Centre-du-Québec
  - Estrie
  - Montréal
  - Outaouais
  - Abitibi-Témiscamingue
  - Côte-Nord
  - Nord-du-Québec
  - Gaspésie-îles-de-la-Madeleine
  - Chaudière-Appalaches
  - Laval
  - Lanaudière
  - Laurentides
  - Montérégie
- regional mental health budget (\$/capita)
  - 2018-2019
  - 2017-2018
  - 2016-2017
  - 2015-2016
- regional addictions health budget (\$/capita)
  - 2018-2019
  - 2017-2018
  - 2016-2017
  - 2015-2016

| derived variables                             | variable name |
|-----------------------------------------------|---------------|
| rss 01 bas-saint-laurent mental health budget | rss_01_mh_3   |
| rss 01 bas-saint-laurent mental health budget | rss_01_mh_6   |
| rss 01 bas-saint-laurent mental health budget | rss_01_mh_12  |

|    |                                                          |              |
|----|----------------------------------------------------------|--------------|
| 1  |                                                          |              |
| 2  |                                                          |              |
| 3  |                                                          |              |
| 4  | rss 01 bas-saint-laurent mental health budget            | rss_01_mh_24 |
| 5  | rss 01 bas-saint-laurent mental health budget            | rss_01_mh_36 |
| 6  | rss 01 bas-saint-laurent mental health budget            | rss_01_mh_48 |
| 7  | rss 01 bas-saint-laurent mental health budget            | rss_01_mh_60 |
| 8  |                                                          |              |
| 9  | rss 02 saguenay-lac-saint-jean mental health budget      | rss_02_mh_3  |
| 10 | rss 02 saguenay-lac-saint-jean mental health budget      | rss_02_mh_6  |
| 11 | rss 02 saguenay-lac-saint-jean mental health budget      | rss_02_mh_12 |
| 12 | rss 02 saguenay-lac-saint-jean mental health budget      | rss_02_mh_24 |
| 13 | rss 02 saguenay-lac-saint-jean mental health budget      | rss_02_mh_36 |
| 14 | rss 02 saguenay-lac-saint-jean mental health budget      | rss_02_mh_48 |
| 15 | rss 02 saguenay-lac-saint-jean mental health budget      | rss_02_mh_60 |
| 16 |                                                          |              |
| 17 | rss 03 capitale-nationale mental health budget           | rss_03_mh_3  |
| 18 | rss 03 capitale-nationale mental health budget           | rss_03_mh_6  |
| 19 | rss 03 capitale-nationale mental health budget           | rss_03_mh_12 |
| 20 | rss 03 capitale-nationale mental health budget           | rss_03_mh_14 |
| 21 | rss 03 capitale-nationale mental health budget           | rss_03_mh_36 |
| 22 | rss 03 capitale-nationale mental health budget           | rss_03_mh_48 |
| 23 | rss 03 capitale-nationale mental health budget           | rss_03_mh_60 |
| 24 |                                                          |              |
| 25 | rss 04 mauricie et centre-du-québec mental health budget | rss_04_mh_3  |
| 26 | rss 04 mauricie et centre-du-québec mental health budget | rss_04_mh_6  |
| 27 | rss 04 mauricie et centre-du-québec mental health budget | rss_04_mh_12 |
| 28 | rss 04 mauricie et centre-du-québec mental health budget | rss_04_mh_24 |
| 29 | rss 04 mauricie et centre-du-québec mental health budget | rss_04_mh_36 |
| 30 | rss 04 mauricie et centre-du-québec mental health budget | rss_04_mh_48 |
| 31 | rss 04 mauricie et centre-du-québec mental health budget | rss_04_mh_60 |
| 32 |                                                          |              |
| 33 | rss 05 estrie mental health budget                       | rss_05_mh_3  |
| 34 | rss 05 estrie mental health budget                       | rss_05_mh_6  |
| 35 | rss 05 estrie mental health budget                       | rss_05_mh_12 |
| 36 | rss 05 estrie mental health budget                       | rss_05_mh_24 |
| 37 | rss 05 estrie mental health budget                       | rss_05_mh_36 |
| 38 | rss 05 estrie mental health budget                       | rss_05_mh_48 |
| 39 | rss 05 estrie mental health budget                       | rss_05_mh_60 |
| 40 |                                                          |              |
| 41 | rss 06 montréal mental health budget                     | rss_06_mh_3  |
| 42 | rss 06 montréal mental health budget                     | rss_06_mh_6  |
| 43 | rss 06 montréal mental health budget                     | rss_06_mh_12 |
| 44 | rss 06 montréal mental health budget                     | rss_06_mh_24 |
| 45 | rss 06 montréal mental health budget                     | rss_06_mh_36 |
| 46 | rss 06 montréal mental health budget                     | rss_06_mh_48 |
| 47 | rss 06 montréal mental health budget                     | rss_06_mh_60 |
| 48 |                                                          |              |
| 49 | rss 07 outaouais mental health budget                    | rss_07_mh_3  |
| 50 | rss 07 outaouais mental health budget                    | rss_07_mh_6  |
| 51 |                                                          |              |
| 52 |                                                          |              |
| 53 |                                                          |              |
| 54 |                                                          |              |
| 55 |                                                          |              |
| 56 |                                                          |              |
| 57 |                                                          |              |
| 58 |                                                          |              |
| 59 |                                                          |              |
| 60 |                                                          |              |

|    |                                                           |              |
|----|-----------------------------------------------------------|--------------|
| 1  |                                                           |              |
| 2  |                                                           |              |
| 3  |                                                           |              |
| 4  | rss 07 outaouais mental health budget                     | rss_07_mh_12 |
| 5  | rss 07 outaouais mental health budget                     | rss_07_mh_24 |
| 6  | rss 07 outaouais mental health budget                     | rss_07_mh_36 |
| 7  | rss 07 outaouais mental health budget                     | rss_07_mh_48 |
| 8  | rss 07 outaouais mental health budget                     | rss_07_mh_60 |
| 9  |                                                           |              |
| 10 | rss 08 abitibi-témiscamingue mental health budget         | rss_08_mh_3  |
| 11 | rss 08 abitibi-témiscamingue mental health budget         | rss_08_mh_6  |
| 12 | rss 08 abitibi-témiscamingue mental health budget         | rss_08_mh_12 |
| 13 | rss 08 abitibi-témiscamingue mental health budget         | rss_08_mh_24 |
| 14 | rss 08 abitibi-témiscamingue mental health budget         | rss_08_mh_36 |
| 15 | rss 08 abitibi-témiscamingue mental health budget         | rss_08_mh_48 |
| 16 | rss 08 abitibi-témiscamingue mental health budget         | rss_08_mh_60 |
| 17 |                                                           |              |
| 18 | rss 09 côte-nord mental health budget                     | rss_09_mh_3  |
| 19 | rss 09 côte-nord mental health budget                     | rss_09_mh_6  |
| 20 | rss 09 côte-nord mental health budget                     | rss_09_mh_12 |
| 21 | rss 09 côte-nord mental health budget                     | rss_09_mh_24 |
| 22 | rss 09 côte-nord mental health budget                     | rss_09_mh_36 |
| 23 | rss 09 côte-nord mental health budget                     | rss_09_mh_48 |
| 24 | rss 09 côte-nord mental health budget                     | rss_09_mh_60 |
| 25 |                                                           |              |
| 26 | rss 10 nord-du-québec mental health budget                | rss_10_mh_3  |
| 27 | rss 10 nord-du-québec mental health budget                | rss_10_mh_6  |
| 28 | rss 10 nord-du-québec mental health budget                | rss_10_mh_12 |
| 29 | rss 10 nord-du-québec mental health budget                | rss_10_mh_24 |
| 30 | rss 10 nord-du-québec mental health budget                | rss_10_mh_36 |
| 31 | rss 10 nord-du-québec mental health budget                | rss_10_mh_48 |
| 32 | rss 10 nord-du-québec mental health budget                | rss_10_mh_60 |
| 33 |                                                           |              |
| 34 | rss 11 gaspésie-îles-de-la-madeleine mental health budget | rss_11_mh_3  |
| 35 | rss 11 gaspésie-îles-de-la-madeleine mental health budget | rss_11_mh_6  |
| 36 | rss 11 gaspésie-îles-de-la-madeleine mental health budget | rss_11_mh_12 |
| 37 | rss 11 gaspésie-îles-de-la-madeleine mental health budget | rss_11_mh_24 |
| 38 | rss 11 gaspésie-îles-de-la-madeleine mental health budget | rss_11_mh_36 |
| 39 | rss 11 gaspésie-îles-de-la-madeleine mental health budget | rss_11_mh_48 |
| 40 | rss 11 gaspésie-îles-de-la-madeleine mental health budget | rss_11_mh_60 |
| 41 |                                                           |              |
| 42 | rss 12 chaudière-appalaches mental health budget          | rss_12_mh_3  |
| 43 | rss 12 chaudière-appalaches mental health budget          | rss_12_mh_6  |
| 44 | rss 12 chaudière-appalaches mental health budget          | rss_12_mh_12 |
| 45 | rss 12 chaudière-appalaches mental health budget          | rss_12_mh_24 |
| 46 | rss 12 chaudière-appalaches mental health budget          | rss_12_mh_36 |
| 47 | rss 12 chaudière-appalaches mental health budget          | rss_12_mh_48 |
| 48 | rss 12 chaudière-appalaches mental health budget          | rss_12_mh_60 |
| 49 |                                                           |              |
| 50 | rss 13 laval mental health budget                         | rss_13_mh_3  |
| 51 |                                                           |              |
| 52 |                                                           |              |
| 53 |                                                           |              |
| 54 |                                                           |              |
| 55 |                                                           |              |
| 56 |                                                           |              |
| 57 |                                                           |              |
| 58 |                                                           |              |
| 59 |                                                           |              |
| 60 |                                                           |              |

|    |                                                  |              |
|----|--------------------------------------------------|--------------|
| 1  |                                                  |              |
| 2  |                                                  |              |
| 3  |                                                  |              |
| 4  | rss 13 laval mental health budget                | rss_13_mh_6  |
| 5  | rss 13 laval mental health budget                | rss_13_mh_12 |
| 6  | rss 13 laval mental health budget                | rss_13_mh_24 |
| 7  | rss 13 laval mental health budget                | rss_13_mh_36 |
| 8  | rss 13 laval mental health budget                | rss_13_mh_48 |
| 9  | rss 13 laval mental health budget                | rss_13_mh_60 |
| 10 | rss 13 laval mental health budget                | rss_13_mh_60 |
| 11 | rss 14 lanaudière mental health budget           | rss_14_mh_3  |
| 12 | rss 14 lanaudière mental health budget           | rss_14_mh_6  |
| 13 | rss 14 lanaudière mental health budget           | rss_14_mh_12 |
| 14 | rss 14 lanaudière mental health budget           | rss_14_mh_12 |
| 15 | rss 14 lanaudière mental health budget           | rss_14_mh_24 |
| 16 | rss 14 lanaudière mental health budget           | rss_14_mh_36 |
| 17 | rss 14 lanaudière mental health budget           | rss_14_mh_36 |
| 18 | rss 14 lanaudière mental health budget           | rss_14_mh_48 |
| 19 | rss 14 lanaudière mental health budget           | rss_14_mh_48 |
| 20 | rss 14 lanaudière mental health budget           | rss_14_mh_60 |
| 21 | rss 14 lanaudière mental health budget           | rss_14_mh_60 |
| 22 | rss 15 laurentides mental health budget          | rss_15_mh_3  |
| 23 | rss 15 laurentides mental health budget          | rss_15_mh_6  |
| 24 | rss 15 laurentides mental health budget          | rss_15_mh_12 |
| 25 | rss 15 laurentides mental health budget          | rss_15_mh_12 |
| 26 | rss 15 laurentides mental health budget          | rss_15_mh_24 |
| 27 | rss 15 laurentides mental health budget          | rss_15_mh_24 |
| 28 | rss 15 laurentides mental health budget          | rss_15_mh_36 |
| 29 | rss 15 laurentides mental health budget          | rss_15_mh_36 |
| 30 | rss 15 laurentides mental health budget          | rss_15_mh_48 |
| 31 | rss 15 laurentides mental health budget          | rss_15_mh_48 |
| 32 | rss 15 laurentides mental health budget          | rss_15_mh_60 |
| 33 | rss 15 laurentides mental health budget          | rss_15_mh_60 |
| 34 | rss 16 montérégie mental health budget           | rss_16_mh_3  |
| 35 | rss 16 montérégie mental health budget           | rss_16_mh_6  |
| 36 | rss 16 montérégie mental health budget           | rss_16_mh_12 |
| 37 | rss 16 montérégie mental health budget           | rss_16_mh_12 |
| 38 | rss 16 montérégie mental health budget           | rss_16_mh_24 |
| 39 | rss 16 montérégie mental health budget           | rss_16_mh_24 |
| 40 | rss 16 montérégie mental health budget           | rss_16_mh_36 |
| 41 | rss 16 montérégie mental health budget           | rss_16_mh_36 |
| 42 | rss 16 montérégie mental health budget           | rss_16_mh_48 |
| 43 | rss 16 montérégie mental health budget           | rss_16_mh_48 |
| 44 | rss 16 montérégie mental health budget           | rss_16_mh_60 |
| 45 | rss 16 montérégie mental health budget           | rss_16_mh_60 |
| 46 | rss 01 bas-saint-laurent addictions budget       | rss_01_a_3   |
| 47 | rss 01 bas-saint-laurent addictions budget       | rss_01_a_6   |
| 48 | rss 01 bas-saint-laurent addictions budget       | rss_01_a_12  |
| 49 | rss 01 bas-saint-laurent addictions budget       | rss_01_a_12  |
| 50 | rss 01 bas-saint-laurent addictions budget       | rss_01_a_24  |
| 51 | rss 01 bas-saint-laurent addictions budget       | rss_01_a_24  |
| 52 | rss 01 bas-saint-laurent addictions budget       | rss_01_a_36  |
| 53 | rss 01 bas-saint-laurent addictions budget       | rss_01_a_36  |
| 54 | rss 01 bas-saint-laurent addictions budget       | rss_01_a_48  |
| 55 | rss 01 bas-saint-laurent addictions budget       | rss_01_a_48  |
| 56 | rss 01 bas-saint-laurent addictions budget       | rss_01_a_60  |
| 57 | rss 01 bas-saint-laurent addictions budget       | rss_01_a_60  |
| 58 | rss 02 saguenay-lac-saint-jean addictions budget | rss_02_a_3   |
| 59 | rss 02 saguenay-lac-saint-jean addictions budget | rss_02_a_6   |
| 60 | rss 02 saguenay-lac-saint-jean addictions budget | rss_02_a_12  |
|    | rss 02 saguenay-lac-saint-jean addictions budget | rss_02_a_12  |
|    | rss 02 saguenay-lac-saint-jean addictions budget | rss_02_a_24  |
|    | rss 02 saguenay-lac-saint-jean addictions budget | rss_02_a_24  |
|    | rss 02 saguenay-lac-saint-jean addictions budget | rss_02_a_36  |
|    | rss 02 saguenay-lac-saint-jean addictions budget | rss_02_a_36  |
|    | rss 02 saguenay-lac-saint-jean addictions budget | rss_02_a_48  |
|    | rss 02 saguenay-lac-saint-jean addictions budget | rss_02_a_48  |
|    | rss 02 saguenay-lac-saint-jean addictions budget | rss_02_a_60  |
|    | rss 02 saguenay-lac-saint-jean addictions budget | rss_02_a_60  |

|    |                                                       |             |
|----|-------------------------------------------------------|-------------|
| 1  |                                                       |             |
| 2  |                                                       |             |
| 3  |                                                       |             |
| 4  | rss 03 capitale-nationale addictions budget           | rss_03_a_3  |
| 5  | rss 03 capitale-nationale addictions budget           | rss_03_a_6  |
| 6  | rss 03 capitale-nationale addictions budget           | rss_03_a_12 |
| 7  | rss 03 capitale-nationale addictions budget           | rss_03_a_24 |
| 8  | rss 03 capitale-nationale addictions budget           | rss_03_a_36 |
| 9  | rss 03 capitale-nationale addictions budget           | rss_03_a_48 |
| 10 | rss 03 capitale-nationale addictions budget           | rss_03_a_60 |
| 11 | rss 03 capitale-nationale addictions budget           | rss_03_a_60 |
| 12 | rss 04 mauricie et centre-du-québec addictions budget | rss_04_a_3  |
| 13 | rss 04 mauricie et centre-du-québec addictions budget | rss_04_a_6  |
| 14 | rss 04 mauricie et centre-du-québec addictions budget | rss_04_a_12 |
| 15 | rss 04 mauricie et centre-du-québec addictions budget | rss_04_a_24 |
| 16 | rss 04 mauricie et centre-du-québec addictions budget | rss_04_a_36 |
| 17 | rss 04 mauricie et centre-du-québec addictions budget | rss_04_a_48 |
| 18 | rss 04 mauricie et centre-du-québec addictions budget | rss_04_a_60 |
| 19 | rss 04 mauricie et centre-du-québec addictions budget | rss_04_a_60 |
| 20 | rss 04 mauricie et centre-du-québec addictions budget | rss_04_a_60 |
| 21 | rss 05 estrie addictions budget                       | rss_05_a_3  |
| 22 | rss 05 estrie addictions budget                       | rss_05_a_6  |
| 23 | rss 05 estrie addictions budget                       | rss_05_a_12 |
| 24 | rss 05 estrie addictions budget                       | rss_05_a_24 |
| 25 | rss 05 estrie addictions budget                       | rss_05_a_36 |
| 26 | rss 05 estrie addictions budget                       | rss_05_a_48 |
| 27 | rss 05 estrie addictions budget                       | rss_05_a_60 |
| 28 | rss 05 estrie addictions budget                       | rss_05_a_60 |
| 29 | rss 05 estrie addictions budget                       | rss_05_a_60 |
| 30 | rss 06 montréal addictions budget                     | rss_06_a_3  |
| 31 | rss 06 montréal addictions budget                     | rss_06_a_6  |
| 32 | rss 06 montréal addictions budget                     | rss_06_a_12 |
| 33 | rss 06 montréal addictions budget                     | rss_06_a_24 |
| 34 | rss 06 montréal addictions budget                     | rss_06_a_36 |
| 35 | rss 06 montréal addictions budget                     | rss_06_a_48 |
| 36 | rss 06 montréal addictions budget                     | rss_06_a_60 |
| 37 | rss 06 montréal addictions budget                     | rss_06_a_60 |
| 38 | rss 06 montréal addictions budget                     | rss_06_a_60 |
| 39 | rss 07 outaouais addictions budget                    | rss_07_a_3  |
| 40 | rss 07 outaouais addictions budget                    | rss_07_a_6  |
| 41 | rss 07 outaouais addictions budget                    | rss_07_a_12 |
| 42 | rss 07 outaouais addictions budget                    | rss_07_a_24 |
| 43 | rss 07 outaouais addictions budget                    | rss_07_a_36 |
| 44 | rss 07 outaouais addictions budget                    | rss_07_a_48 |
| 45 | rss 07 outaouais addictions budget                    | rss_07_a_60 |
| 46 | rss 07 outaouais addictions budget                    | rss_07_a_60 |
| 47 | rss 07 outaouais addictions budget                    | rss_07_a_60 |
| 48 | rss 08 abitibi-témiscamingue addictions budget        | rss_08_a_3  |
| 49 | rss 08 abitibi-témiscamingue addictions budget        | rss_08_a_6  |
| 50 | rss 08 abitibi-témiscamingue addictions budget        | rss_08_a_12 |
| 51 | rss 08 abitibi-témiscamingue addictions budget        | rss_08_a_24 |
| 52 | rss 08 abitibi-témiscamingue addictions budget        | rss_08_a_36 |
| 53 | rss 08 abitibi-témiscamingue addictions budget        | rss_08_a_48 |
| 54 | rss 08 abitibi-témiscamingue addictions budget        | rss_08_a_48 |
| 55 | rss 08 abitibi-témiscamingue addictions budget        | rss_08_a_48 |
| 56 |                                                       |             |
| 57 |                                                       |             |
| 58 |                                                       |             |
| 59 |                                                       |             |
| 60 |                                                       |             |

|    |                                                         |             |
|----|---------------------------------------------------------|-------------|
| 1  |                                                         |             |
| 2  |                                                         |             |
| 3  |                                                         |             |
| 4  | rss 08 abitibi-témiscamingue addictions budget          | rss_08_a_60 |
| 5  | rss 09 côte-nord addictions budget                      | rss_09_a_3  |
| 6  | rss 09 côte-nord addictions budget                      | rss_09_a_6  |
| 7  | rss 09 côte-nord addictions budget                      | rss_09_a_12 |
| 8  | rss 09 côte-nord addictions budget                      | rss_09_a_24 |
| 9  |                                                         |             |
| 10 | rss 09 côte-nord addictions budget                      | rss_09_a_36 |
| 11 | rss 09 côte-nord addictions budget                      | rss_09_a_48 |
| 12 | rss 09 côte-nord addictions budget                      | rss_09_a_60 |
| 13 |                                                         |             |
| 14 | rss 10 nord-du-québec addictions budget                 | rss_10_a_3  |
| 15 | rss 10 nord-du-québec addictions budget                 | rss_10_a_6  |
| 16 | rss 10 nord-du-québec addictions budget                 | rss_10_a_12 |
| 17 | rss 10 nord-du-québec addictions budget                 | rss_10_a_24 |
| 18 | rss 10 nord-du-québec addictions budget                 | rss_10_a_36 |
| 19 | rss 10 nord-du-québec addictions budget                 | rss_10_a_48 |
| 20 | rss 10 nord-du-québec addictions budget                 | rss_10_a_60 |
| 21 |                                                         |             |
| 22 | rss 11 gaspésie--îles-de-la-madeleine addictions budget | rss_11_a_3  |
| 23 | rss 11 gaspésie--îles-de-la-madeleine addictions budget | rss_11_a_6  |
| 24 | rss 11 gaspésie--îles-de-la-madeleine addictions budget | rss_11_a_12 |
| 25 | rss 11 gaspésie--îles-de-la-madeleine addictions budget | rss_11_a_24 |
| 26 | rss 11 gaspésie--îles-de-la-madeleine addictions budget | rss_11_a_36 |
| 27 | rss 11 gaspésie--îles-de-la-madeleine addictions budget | rss_11_a_48 |
| 28 | rss 11 gaspésie--îles-de-la-madeleine addictions budget | rss_11_a_60 |
| 29 |                                                         |             |
| 30 | rss 12 chaudière-appalaches addictions budget           | rss_12_a_3  |
| 31 | rss 12 chaudière-appalaches addictions budget           | rss_12_a_6  |
| 32 | rss 12 chaudière-appalaches addictions budget           | rss_12_a_12 |
| 33 | rss 12 chaudière-appalaches addictions budget           | rss_12_a_24 |
| 34 | rss 12 chaudière-appalaches addictions budget           | rss_12_a_36 |
| 35 | rss 12 chaudière-appalaches addictions budget           | rss_12_a_48 |
| 36 | rss 12 chaudière-appalaches addictions budget           | rss_12_a_60 |
| 37 |                                                         |             |
| 38 | rss 13 laval addictions budget                          | rss_13_a_3  |
| 39 | rss 13 laval addictions budget                          | rss_13_a_6  |
| 40 | rss 13 laval addictions budget                          | rss_13_a_12 |
| 41 | rss 13 laval addictions budget                          | rss_13_a_24 |
| 42 | rss 13 laval addictions budget                          | rss_13_a_36 |
| 43 | rss 13 laval addictions budget                          | rss_13_a_48 |
| 44 | rss 13 laval addictions budget                          | rss_13_a_60 |
| 45 |                                                         |             |
| 46 | rss 14 lanaudière addictions budget                     | rss_14_a_3  |
| 47 | rss 14 lanaudière addictions budget                     | rss_14_a_6  |
| 48 | rss 14 lanaudière addictions budget                     | rss_14_a_12 |
| 49 | rss 14 lanaudière addictions budget                     | rss_14_a_24 |
| 50 | rss 14 lanaudière addictions budget                     | rss_14_a_36 |
| 51 |                                                         |             |
| 52 |                                                         |             |
| 53 |                                                         |             |
| 54 |                                                         |             |
| 55 |                                                         |             |
| 56 |                                                         |             |
| 57 |                                                         |             |
| 58 |                                                         |             |
| 59 |                                                         |             |
| 60 |                                                         |             |

|    |                                           |                           |
|----|-------------------------------------------|---------------------------|
| 1  |                                           |                           |
| 2  |                                           |                           |
| 3  |                                           |                           |
| 4  | rss 14 lanaudière addictions budget       | rss_14_a_48               |
| 5  | rss 14 lanaudière addictions budget       | rss_14_a_60               |
| 6  | rss 15 laurentides addictions budget      | rss_15_a_3                |
| 7  | rss 15 laurentides addictions budget      | rss_15_a_6                |
| 8  | rss 15 laurentides addictions budget      | rss_15_a_12               |
| 9  | rss 15 laurentides addictions budget      | rss_15_a_24               |
| 10 | rss 15 laurentides addictions budget      | rss_15_a_36               |
| 11 | rss 15 laurentides addictions budget      | rss_15_a_48               |
| 12 | rss 15 laurentides addictions budget      | rss_15_a_60               |
| 13 | rss 15 laurentides addictions budget      | rss_15_a_60               |
| 14 | rss 16 montérégie addictions budget       | rss_16_a_3                |
| 15 | rss 16 montérégie addictions budget       | rss_16_a_6                |
| 16 | rss 16 montérégie addictions budget       | rss_16_a_12               |
| 17 | rss 16 montérégie addictions budget       | rss_16_a_24               |
| 18 | rss 16 montérégie addictions budget       | rss_16_a_36               |
| 19 | rss 16 montérégie addictions budget       | rss_16_a_48               |
| 20 | rss 16 montérégie addictions budget       | rss_16_a_60               |
| 21 | rss 16 montérégie addictions budget       | rss_16_a_60               |
| 22 | regional mental health budget (\$/capita) | region_mhbudget_2018-2019 |
| 23 | regional mental health budget (\$/capita) | region_mhbudget_2017-2018 |
| 24 | regional mental health budget (\$/capita) | region_mhbudget_2016-2017 |
| 25 | regional mental health budget (\$/capita) | region_mhbudget_2015-2016 |
| 26 | regional addictions budget (\$/capita)    | region_abudget_2018-2019  |
| 27 | regional addictions budget (\$/capita)    | region_abudget_2017-2018  |
| 28 | regional addictions budget (\$/capita)    | region_abudget_2016-2017  |
| 29 | regional addictions budget (\$/capita)    | region_abudget_2015-2016  |
| 30 |                                           |                           |
| 31 |                                           |                           |
| 32 |                                           |                           |
| 33 |                                           |                           |
| 34 |                                           |                           |
| 35 |                                           |                           |
| 36 |                                           |                           |
| 37 |                                           |                           |
| 38 |                                           |                           |
| 39 |                                           |                           |
| 40 |                                           |                           |
| 41 |                                           |                           |
| 42 |                                           |                           |
| 43 |                                           |                           |
| 44 |                                           |                           |
| 45 |                                           |                           |
| 46 |                                           |                           |
| 47 |                                           |                           |
| 48 |                                           |                           |
| 49 |                                           |                           |
| 50 |                                           |                           |
| 51 |                                           |                           |
| 52 |                                           |                           |
| 53 |                                           |                           |
| 54 |                                           |                           |
| 55 |                                           |                           |
| 56 |                                           |                           |
| 57 |                                           |                           |
| 58 |                                           |                           |
| 59 |                                           |                           |
| 60 |                                           |                           |

## ii. QUALITY OF CARE INDICATORS (QUALITYCARE)

- quality of anxiety or depressive disorders mental health services follow-up in primary care (continuous)
- quality of mental health services depression disorder mental health services follow-up in primary care (continuous)
- quality of substance use disorder mental health services follow-up in primary care (continuous)
- quality of mental health care services follow-up after hospitalization: readmission within 30 days (continuous)
- quality of mental health services follow-up in primary care after suicide attempt (continuous)
- quality of community mental health services (continuous)
- quality of community mental health services of patients with severe mental illness (continuous)
- quality of community mental health services of patients with common mental disorders (continuous)
- quality of community mental health services of patients with personality disorders (continuous)
- adequate use of emergency room for mental health service (continuous)



| derived variables                                                                                        | variable name          |
|----------------------------------------------------------------------------------------------------------|------------------------|
| quality of anxiety or depressive disorders mental health services follow-up in primary care (continuous) | qfu_primcare_anxdep_3  |
| quality of anxiety or depressive disorders mental health services follow-up in primary care (continuous) | qfu_primcare_anxdep_6  |
| quality of anxiety or depressive disorders mental health services follow-up in primary care (continuous) | qfu_primcare_anxdep_12 |
| quality of anxiety or depressive disorders mental health services follow-up in primary care (continuous) | qfu_primcare_anxdep_24 |
| quality of anxiety or depressive disorders mental health services follow-up in primary care (continuous) | qfu_primcare_anxdep_36 |
| quality of anxiety or depressive disorders mental health services follow-up in primary care (continuous) | qfu_primcare_anxdep_48 |
| quality of anxiety or depressive disorders mental health services follow-up in primary care (continuous) | qfu_primcare_anxdep_60 |
| quality of depression disorder mental health services follow-up in primary care (continuous)             | qfu_primcare_dep_3     |
| quality of depression disorder mental health services follow-up in primary care (continuous)             | qfu_primcare_dep_6     |
| quality of depression disorder mental health services follow-up in primary care (continuous)             | qfu_primcare_dep_12    |
| quality of depression disorder mental health services follow-up in primary care (continuous)             | qfu_primcare_dep_24    |
| quality of depression disorder mental health services follow-up in primary care (continuous)             | qfu_primcare_dep_36    |
| quality of depression disorder mental health services follow-up in primary care (continuous)             | qfu_primcare_dep_48    |
| quality of depression disorder mental health services follow-up in primary care (continuous)             | qfu_primcare_dep_60    |
| quality of substance use disorder mental health services follow-up in primary care (continuous)          | qfu_primcare_sud_3     |
| quality of substance use disorder mental health services follow-up in primary care (continuous)          | qfu_primcare_sud_6     |
| quality of substance use disorder mental health services follow-up in primary care (continuous)          | qfu_primcare_sud_12    |

|                                                                                                                 |                                   |
|-----------------------------------------------------------------------------------------------------------------|-----------------------------------|
| quality of substance use disorder mental health services follow-up in primary care (continuous)                 | qfu_primcare_sud_24               |
| quality of substance use disorder mental health services follow-up in primary care (continuous)                 | qfu_primcare_sud_36               |
| quality of substance use disorder mental health services follow-up in primary care (continuous)                 | qfu_primcare_sud_48               |
| quality of substance use disorder mental health services follow-up in primary care (continuous)                 | qfu_primcare_sud_60               |
| quality of mental health care services follow-up after hospitalization: readmission within 30 days (continuous) | qfu_posthosp_readmit30_3          |
| quality of mental health care services follow-up after hospitalization: readmission within 30 days (continuous) | qfu_posthosp_readmit30_6          |
| quality of mental health care services follow-up after hospitalization: readmission within 30 days (continuous) | qfu_posthosp_readmit30_12         |
| quality of mental health care services follow-up after hospitalization: readmission within 30 days (continuous) | qfu_posthosp_readmit30_24         |
| quality of mental health care services follow-up after hospitalization: readmission within 30 days (continuous) | qfu_posthosp_readmit30_36         |
| quality of mental health care services follow-up after hospitalization: readmission within 30 days (continuous) | qfu_posthosp_readmit30_48         |
| quality of mental health care services follow-up after hospitalization: readmission within 30 days (continuous) | qfu_posthosp_readmit30_60         |
| quality of mental health services followup in primary care after suicide attempt (continuous)                   | qfu_primcare_postsucideattempt_3  |
| quality of mental health services followup in primary care after suicide attempt (continuous)                   | qfu_primcare_postsucideattempt_6  |
| quality of mental health services followup in primary care after suicide attempt (continuous)                   | qfu_primcare_postsucideattempt_12 |
| quality of mental health services followup in primary care after suicide attempt (continuous)                   | qfu_primcare_postsucideattempt_24 |
| quality of mental health services followup in primary care after suicide attempt (continuous)                   | qfu_primcare_postsucideattempt_36 |
| quality of mental health services followup in primary care after suicide attempt (continuous)                   | qfu_primcare_postsucideattempt_48 |
| quality of mental health services followup in primary care after suicide attempt (continuous)                   | qfu_primcare_postsucideattempt_60 |
| quality of community mental health services (continuous)                                                        | qcomserv_3                        |

|    |                                                  |                    |
|----|--------------------------------------------------|--------------------|
| 1  |                                                  |                    |
| 2  |                                                  |                    |
| 3  | quality of community mental health services      | qcomserv_6         |
| 4  | (continuous)                                     |                    |
| 5  | quality of community mental health services      | qcomserv_12        |
| 6  | (continuous)                                     |                    |
| 7  | quality of community mental health services      | qcomserv_24        |
| 8  | (continuous)                                     |                    |
| 9  | quality of community mental health services      | qcomserv_36        |
| 10 | (continuous)                                     |                    |
| 11 | quality of community mental health services      | qcomserv_48        |
| 12 | (continuous)                                     |                    |
| 13 | quality of community mental health services      | qcomserv_60        |
| 14 | (continuous)                                     |                    |
| 15 | quality of community mental health services of   | qcomserv_severe_3  |
| 16 | patients with severe mental illness (continuous) |                    |
| 17 | quality of community mental health services of   | qcomserv_severe_6  |
| 18 | patients with severe mental illness (continuous) |                    |
| 19 | quality of community mental health services of   | qcomserv_severe_12 |
| 20 | patients with severe mental illness (continuous) |                    |
| 21 | quality of community mental health services of   | qcomserv_severe_24 |
| 22 | patients with severe mental illness (continuous) |                    |
| 23 | quality of community mental health services of   | qcomserv_severe_36 |
| 24 | patients with severe mental illness (continuous) |                    |
| 25 | quality of community mental health services of   | qcomserv_severe_48 |
| 26 | patients with severe mental illness (continuous) |                    |
| 27 | quality of community mental health services of   | qcomserv_severe_60 |
| 28 | patients with severe mental illness (continuous) |                    |
| 29 | quality of community mental health services of   | qcomserv_cmd_3     |
| 30 | patients with common mental disorders            |                    |
| 31 | (continuous)                                     |                    |
| 32 | quality of community mental health services of   | qcomserv_cmd_6     |
| 33 | patients with common mental disorders            |                    |
| 34 | (continuous)                                     |                    |
| 35 | quality of community mental health services of   | qcomserv_cmd_12    |
| 36 | patients with common mental disorders            |                    |
| 37 | (continuous)                                     |                    |
| 38 | quality of community mental health services of   | qcomserv_cmd_24    |
| 39 | patients with common mental disorders            |                    |
| 40 | (continuous)                                     |                    |
| 41 | quality of community mental health services of   | qcomserv_cmd_36    |
| 42 | patients with common mental disorders            |                    |
| 43 | (continuous)                                     |                    |
| 44 | quality of community mental health services of   | qcomserv_cmd_48    |
| 45 | patients with common mental disorders            |                    |
| 46 | (continuous)                                     |                    |
| 47 | quality of community mental health services of   |                    |
| 48 | patients with common mental disorders            |                    |
| 49 | (continuous)                                     |                    |
| 50 | quality of community mental health services of   |                    |
| 51 | patients with common mental disorders            |                    |
| 52 | (continuous)                                     |                    |
| 53 | quality of community mental health services of   |                    |
| 54 | patients with common mental disorders            |                    |
| 55 | (continuous)                                     |                    |
| 56 |                                                  |                    |
| 57 |                                                  |                    |
| 58 |                                                  |                    |
| 59 |                                                  |                    |
| 60 |                                                  |                    |

|                                                                                                   |                 |
|---------------------------------------------------------------------------------------------------|-----------------|
| quality of community mental health services of patients with common mental disorders (continuous) | qcomserv_cmd_60 |
| quality of community mental health services of patients with personality disorders (continuous)   | qcomserv_pd_3   |
| quality of community mental health services of patients with personality disorders (continuous)   | qcomserv_pd_6   |
| quality of community mental health services of patients with personality disorders (continuous)   | qcomserv_pd_12  |
| quality of community mental health services of patients with personality disorders (continuous)   | qcomserv_pd_24  |
| quality of community mental health services of patients with personality disorders (continuous)   | qcomserv_pd_36  |
| quality of community mental health services of patients with personality disorders (continuous)   | qcomserv_pd_48  |
| quality of community mental health services of patients with personality disorders (continuous)   | qcomserv_pd_60  |
| adequate use of emergency room for mental health service (continuous)                             | aduse_er_3      |
| adequate use of emergency room for mental health service (continuous)                             | aduse_er_6      |
| adequate use of emergency room for mental health service (continuous)                             | aduse_er_12     |
| adequate use of emergency room for mental health service (continuous)                             | aduse_er_24     |
| adequate use of emergency room for mental health service (continuous)                             | aduse_er_36     |
| adequate use of emergency room for mental health service (continuous)                             | aduse_er_48     |
| adequate use of emergency room for mental health service (continuous)                             | aduse_er_60     |

## APPENDIX A: CLASSES\_MEDICAMENTS\_CAROLINE SIROIS 30

AVRIL.XLSX

Mental health medication

| Psychotropic medications |           |             |                           |  |  |  |
|--------------------------|-----------|-------------|---------------------------|--|--|--|
| Group                    | Sub-group | Medications | Common denomination codes |  |  |  |
|                          |           |             |                           |  |  |  |

| Antipsychotics |          |                   |       |                                        |  |
|----------------|----------|-------------------|-------|----------------------------------------|--|
|                | Typical  |                   |       |                                        |  |
|                |          | Chlopromazine     | 1924  |                                        |  |
|                |          | Flupenthixol      | 41863 |                                        |  |
|                |          |                   | 43202 |                                        |  |
|                |          | Fluphenazine      | 4056  |                                        |  |
|                |          |                   | 4069  |                                        |  |
|                |          |                   | 34284 |                                        |  |
|                |          | Haloperidol       | 4394  |                                        |  |
|                |          |                   | 43540 |                                        |  |
|                |          |                   | 43826 |                                        |  |
|                |          |                   | 46292 |                                        |  |
|                |          | Loxapine          | 34219 |                                        |  |
|                |          |                   | 37612 |                                        |  |
|                |          |                   | 40745 |                                        |  |
|                |          | Methotrimeprazine | 6045  |                                        |  |
|                |          | Perphenazine      | 7176  |                                        |  |
|                |          |                   | 46011 | (In combination with<br>amitryptiline) |  |
|                |          | Pimozide          | 33465 |                                        |  |
|                |          | Pipotiazine       | 41707 |                                        |  |
|                |          | Prochlorperazine  | 45458 |                                        |  |
|                |          |                   | 45528 |                                        |  |
|                |          |                   | 8125  |                                        |  |
|                |          | Thioridazine      | 9594  |                                        |  |
|                |          | Thiopropazine     | 9568  |                                        |  |
|                |          | Trifluoperazine   | 9802  |                                        |  |
|                |          |                   | 34440 |                                        |  |
|                |          |                   | 46108 | (In combination with<br>isopropamide)  |  |
|                |          | Zuclopenthixol    | 47136 |                                        |  |
|                |          |                   | 47137 |                                        |  |
|                |          |                   | 47138 |                                        |  |
|                |          |                   |       |                                        |  |
|                | Atypical | Asenapine         | 47921 |                                        |  |
|                |          | Aripiprazole      | 47801 |                                        |  |
|                |          | Brexpiprazole     | 48153 |                                        |  |
|                |          | Clozapine         | 45580 |                                        |  |
|                |          | Lurasidone        | 47939 |                                        |  |

|  |                                                                                 |                 |       |                                       |  |
|--|---------------------------------------------------------------------------------|-----------------|-------|---------------------------------------|--|
|  |                                                                                 | Olanzapine      | 46318 |                                       |  |
|  |                                                                                 |                 | 47197 |                                       |  |
|  |                                                                                 | Paliperidone    | 47708 |                                       |  |
|  |                                                                                 |                 | 47861 |                                       |  |
|  |                                                                                 | Quetiapine      | 47267 |                                       |  |
|  |                                                                                 | Risperidone     | 46156 |                                       |  |
|  |                                                                                 |                 | 47052 |                                       |  |
|  |                                                                                 | Ziprazidone     | 47717 |                                       |  |
|  |                                                                                 |                 |       |                                       |  |
|  |                                                                                 |                 |       |                                       |  |
|  |                                                                                 |                 |       |                                       |  |
|  |                                                                                 |                 |       |                                       |  |
|  | <b>Antidepressants - Those mostly used for depression and anxiety disorders</b> |                 |       |                                       |  |
|  |                                                                                 |                 |       |                                       |  |
|  | SSRIs                                                                           | Citalopram      | 46543 |                                       |  |
|  |                                                                                 |                 | 47317 |                                       |  |
|  |                                                                                 | Escitalopram    | 47553 |                                       |  |
|  |                                                                                 |                 | 47971 |                                       |  |
|  |                                                                                 | Fluoxetine      | 45504 |                                       |  |
|  |                                                                                 | Fluvoxamine     | 45633 |                                       |  |
|  |                                                                                 | Paroxetine      | 47061 |                                       |  |
|  |                                                                                 | Sertraline      | 45630 |                                       |  |
|  |                                                                                 |                 |       |                                       |  |
|  |                                                                                 |                 |       |                                       |  |
|  | SNRIs                                                                           | Desvenlafaxine  | 47770 |                                       |  |
|  |                                                                                 | Duloxetine      | 47714 |                                       |  |
|  |                                                                                 | Levomilnacipran | 48075 |                                       |  |
|  |                                                                                 | Venlafaxine     | 46244 |                                       |  |
|  |                                                                                 |                 | 47118 |                                       |  |
|  |                                                                                 |                 |       |                                       |  |
|  | NDRIs                                                                           | Bupropion       | 46435 | (Also used for tobacco cessation)     |  |
|  |                                                                                 |                 | 47285 |                                       |  |
|  |                                                                                 |                 | 48205 | (In combination with naltrexone)      |  |
|  |                                                                                 |                 |       |                                       |  |
|  | NaSSAs                                                                          | Mirtazapine     | 46744 | (Also used in low doses for insomnia) |  |
|  |                                                                                 |                 | 47408 |                                       |  |
|  |                                                                                 |                 |       |                                       |  |
|  | MAOI                                                                            | Phenelzine      | 7280  |                                       |  |

|                                                                                                             |                            |                 |       |                                 |  |
|-------------------------------------------------------------------------------------------------------------|----------------------------|-----------------|-------|---------------------------------|--|
|                                                                                                             |                            | Tranlycypromine | 9698  |                                 |  |
|                                                                                                             |                            |                 |       |                                 |  |
|                                                                                                             | IRMA                       | Moclobemide     | 46427 |                                 |  |
|                                                                                                             |                            |                 | 47005 |                                 |  |
|                                                                                                             |                            |                 |       |                                 |  |
|                                                                                                             | SRI+ 5HT1a partial agonist | Vilazodone      | 48227 |                                 |  |
|                                                                                                             |                            |                 |       |                                 |  |
|                                                                                                             | Serotonin modulator        | Vortioxetine    | 48038 |                                 |  |
|                                                                                                             |                            |                 |       |                                 |  |
|                                                                                                             |                            |                 |       |                                 |  |
| <b>Other antidepressants - Those mostly used for other indications than depression or anxiety disorders</b> |                            |                 |       |                                 |  |
|                                                                                                             |                            |                 |       |                                 |  |
|                                                                                                             | Tricyclics                 | Amitryptiline   | 429   |                                 |  |
|                                                                                                             |                            |                 | 46011 | (Combination with perphenazine) |  |
|                                                                                                             |                            | Clomipramine    | 14781 |                                 |  |
|                                                                                                             |                            | Desipramine     | 2522  |                                 |  |
|                                                                                                             |                            | Doxepine        | 3198  |                                 |  |
|                                                                                                             |                            | Imipramine      | 4784  |                                 |  |
|                                                                                                             |                            | Nortriptyline   | 6578  |                                 |  |
|                                                                                                             |                            | Trimipramine    | 9906  |                                 |  |
|                                                                                                             |                            |                 |       |                                 |  |
|                                                                                                             |                            |                 |       |                                 |  |
|                                                                                                             | Inh. S recap + antag 5-HT2 | Trazodone       | 43137 |                                 |  |
|                                                                                                             |                            |                 |       |                                 |  |
|                                                                                                             |                            |                 |       |                                 |  |
| <b>Mood stabilizers (other than antipsychotics and other medications included in other classes)</b>         |                            |                 |       |                                 |  |
|                                                                                                             |                            |                 |       |                                 |  |
|                                                                                                             |                            | Carbamazepine   | 1404  |                                 |  |
|                                                                                                             |                            |                 | 10270 |                                 |  |
|                                                                                                             |                            | Gabapentin      | 46229 |                                 |  |
|                                                                                                             |                            |                 | 47100 |                                 |  |
|                                                                                                             |                            | Lamotrigine     | 47110 |                                 |  |
|                                                                                                             |                            |                 | 46248 |                                 |  |
|                                                                                                             |                            | Lithium         | 47071 |                                 |  |
|                                                                                                             |                            |                 | 47237 |                                 |  |

|  |                    |                            |       |  |  |
|--|--------------------|----------------------------|-------|--|--|
|  |                    |                            | 47589 |  |  |
|  |                    |                            | 5330  |  |  |
|  |                    | Oxcarbazepine              | 46805 |  |  |
|  |                    |                            | 47430 |  |  |
|  |                    | Topiramate                 | 46359 |  |  |
|  |                    |                            | 47229 |  |  |
|  |                    | Valproic acid              | 38951 |  |  |
|  |                    |                            | 39393 |  |  |
|  |                    |                            | 44073 |  |  |
|  |                    |                            |       |  |  |
|  |                    |                            |       |  |  |
|  | <b>Anxiolytics</b> |                            |       |  |  |
|  | Benzodiazépines    | Alprazolam                 | 43501 |  |  |
|  |                    | Bromazepam                 | 43488 |  |  |
|  |                    | Chlordiazépoxide           | 1807  |  |  |
|  |                    | Clobazam                   | 45591 |  |  |
|  |                    | Clonazépam                 | 37872 |  |  |
|  |                    | Clorazépate                | 14768 |  |  |
|  |                    | Diazépam                   | 2717  |  |  |
|  |                    | Flurazépam                 | 4095  |  |  |
|  |                    | Lorazépam                  | 37950 |  |  |
|  |                    | Nitrazépam                 | 42045 |  |  |
|  |                    | Oxazepam                   | 6786  |  |  |
|  |                    | Temazepam                  | 41590 |  |  |
|  |                    | Triazolam                  | 39029 |  |  |
|  |                    |                            |       |  |  |
|  | Buspirone          | Buspirone                  | 45609 |  |  |
|  |                    |                            |       |  |  |
|  | <b>ADHD</b>        |                            |       |  |  |
|  |                    | Amphetamine                | 507   |  |  |
|  |                    |                            | 47601 |  |  |
|  |                    |                            | 48001 |  |  |
|  |                    | Amphetamine/dexamphetamine | 47486 |  |  |
|  |                    | Atomoxetine                | 47547 |  |  |
|  |                    | Dexamphetamine             | 2626  |  |  |
|  |                    |                            |       |  |  |
|  |                    | Lisdexamfetamine           | 47818 |  |  |
|  |                    |                            | 48000 |  |  |
|  |                    | Methylphenidate            | 48003 |  |  |



|                            |                           |              |       |  |
|----------------------------|---------------------------|--------------|-------|--|
|                            |                           |              | 39302 |  |
|                            |                           | Guanfacine   | 47979 |  |
|                            |                           |              |       |  |
| <b>Alzheimer's disease</b> |                           |              |       |  |
|                            | Inh. Acetylcholinesterase | Donepezil    | 47352 |  |
|                            |                           | Galantamine  | 47415 |  |
|                            |                           |              | 46767 |  |
|                            |                           | Rivastigmine | 47726 |  |
|                            |                           |              | 46673 |  |
|                            |                           |              | 47368 |  |
|                            | NMDA                      | Memantine    | 47542 |  |

## Medication classes – other

| MAIN CLASSES                   | Sub-classes that may be studied | AHFS codes or Medications |                                                  |  |  |  |                                                                   |
|--------------------------------|---------------------------------|---------------------------|--------------------------------------------------|--|--|--|-------------------------------------------------------------------|
| <b>Diabetes</b>                |                                 | AHFS sub-class            |                                                  |  |  |  |                                                                   |
|                                |                                 | 68:20                     | Antidiabetes                                     |  |  |  |                                                                   |
| <b>Cardiovascular diseases</b> |                                 |                           |                                                  |  |  |  |                                                                   |
|                                |                                 | AFHS sub-class            |                                                  |  |  |  |                                                                   |
|                                | Antithrombotics                 | 20:12                     | Antithrombotics (anticoagulants, antiplatelets)  |  |  |  | et ajouter les CODES DÉNOMINATIONS COMMUNE ASPIRINE: 143 et 46353 |
|                                | Antihypertensive agents         | 24:08                     | Antihypertensives (alpha-agonists, vasodilators) |  |  |  |                                                                   |
|                                |                                 | 24:20                     | Alpha-blockers                                   |  |  |  |                                                                   |
|                                |                                 | 24:24                     | Beta-blockers                                    |  |  |  |                                                                   |
|                                |                                 | 24:28                     | Calcium channel blockers                         |  |  |  |                                                                   |
|                                |                                 | 24:32                     | ACE inhibitors and ARBs                          |  |  |  |                                                                   |

|                                                                        |                                |                            |                                              |                           |  |                                                                  |
|------------------------------------------------------------------------|--------------------------------|----------------------------|----------------------------------------------|---------------------------|--|------------------------------------------------------------------|
|                                                                        |                                | 40:28                      | Diuretics                                    |                           |  |                                                                  |
|                                                                        | Antiarrhythmic and cardiotonic | 24:04                      | Cardiotropic (antiarrhythmics, cardiotonics) |                           |  |                                                                  |
|                                                                        | Hypolipemians                  | 24:06                      | Hypolipemians (statins, fibrates, etc)       |                           |  |                                                                  |
|                                                                        | Vasodilators                   | 24:12                      | Nitrates and other vasodilators              |                           |  |                                                                  |
|                                                                        |                                |                            |                                              |                           |  |                                                                  |
| <b>Respiratory diseases</b> (mediations used to treat COPD and asthma) |                                |                            |                                              |                           |  |                                                                  |
|                                                                        |                                | Medications                |                                              | Code denomination commune |  |                                                                  |
|                                                                        |                                | Acclidinium                |                                              | 47986                     |  |                                                                  |
|                                                                        |                                | Glycopyrronium             |                                              | 47949                     |  |                                                                  |
|                                                                        |                                | Tiotropium                 |                                              | 46856                     |  |                                                                  |
|                                                                        |                                | Uméclidinium               |                                              | 48109                     |  |                                                                  |
|                                                                        |                                | Formotérol                 |                                              | 47916                     |  |                                                                  |
|                                                                        |                                | Indacatérol                |                                              | 47923                     |  |                                                                  |
|                                                                        |                                | Salmétérol                 |                                              | 46247                     |  |                                                                  |
|                                                                        |                                |                            |                                              | 47112                     |  |                                                                  |
|                                                                        |                                | Olodatérol                 |                                              |                           |  |                                                                  |
|                                                                        |                                | Glycopyrronium/indacatérol |                                              | 48033                     |  |                                                                  |
|                                                                        |                                | Uméclidinium/vilantérol    |                                              | 48224                     |  |                                                                  |
|                                                                        |                                |                            |                                              | 48029                     |  |                                                                  |
|                                                                        |                                | Acclidinium/formotérol     |                                              |                           |  |                                                                  |
|                                                                        |                                | Tiotropium/Olodatérol      |                                              | 48064                     |  |                                                                  |
|                                                                        |                                | Budésonide/formotérol      |                                              | 47428                     |  |                                                                  |
|                                                                        |                                |                            |                                              | 46800                     |  |                                                                  |
|                                                                        |                                |                            |                                              | 47917                     |  |                                                                  |
|                                                                        |                                |                            |                                              | 47925                     |  |                                                                  |
|                                                                        |                                | Fluticasone/salmétérol     |                                              | 46597                     |  |                                                                  |
|                                                                        |                                |                            |                                              | 47335                     |  |                                                                  |
|                                                                        |                                | Fluticasone/vilantérol     |                                              | 48006                     |  |                                                                  |
|                                                                        |                                | Salbutamol                 |                                              | 10530                     |  | Exclure les codes de forme: 116, 203,435, 2262, 2088, 2117, 4147 |
|                                                                        |                                |                            |                                              | 33634                     |  |                                                                  |
|                                                                        |                                |                            |                                              | 46737                     |  |                                                                  |

|  |                                    |                                      |  |                                                                    |                     |                                              |
|--|------------------------------------|--------------------------------------|--|--------------------------------------------------------------------|---------------------|----------------------------------------------|
|  |                                    | Terbutaline                          |  | 34180                                                              |                     |                                              |
|  |                                    | Ipratropium                          |  | 43124                                                              |                     | Exclure les codes de forme: 4321, 5582, 5583 |
|  |                                    |                                      |  | 46640                                                              |                     |                                              |
|  |                                    | Fénotérol/ipratropium                |  | 46288                                                              |                     |                                              |
|  |                                    | Salbutamol/ipratropium               |  | 46302                                                              |                     |                                              |
|  |                                    |                                      |  | 47186                                                              |                     |                                              |
|  |                                    | Roflumilast                          |  | 47854                                                              |                     |                                              |
|  |                                    | Théophylline                         |  | 9464                                                               |                     |                                              |
|  |                                    |                                      |  | 9490                                                               |                     |                                              |
|  |                                    |                                      |  | 9503                                                               |                     |                                              |
|  |                                    | Oxtriphylline                        |  | 43475                                                              |                     |                                              |
|  |                                    | Aminophylline                        |  | 46428                                                              |                     |                                              |
|  |                                    |                                      |  | 364                                                                |                     |                                              |
|  |                                    | Béclométhasone                       |  | 780                                                                |                     |                                              |
|  |                                    | Budénoside                           |  | 45499                                                              |                     |                                              |
|  |                                    | Ciclésone                            |  | 47626                                                              |                     |                                              |
|  |                                    | Fluticasone                          |  | 47712                                                              |                     |                                              |
|  |                                    |                                      |  | 47050                                                              |                     |                                              |
|  |                                    |                                      |  | 46345                                                              |                     |                                              |
|  |                                    | Fluticasone/azélastine               |  | 48092                                                              |                     |                                              |
|  |                                    | Fluticasone/vilantérol/um éclidinium |  | 48224                                                              |                     |                                              |
|  |                                    | Fluticasone/salmétérol               |  | 47335                                                              |                     |                                              |
|  |                                    |                                      |  | 46597                                                              |                     |                                              |
|  |                                    | Mométasone                           |  | 47299                                                              |                     |                                              |
|  |                                    | Mométasone/Formotérol                |  | 48115                                                              |                     |                                              |
|  |                                    |                                      |  | 47914                                                              |                     |                                              |
|  |                                    |                                      |  | 47884                                                              |                     |                                              |
|  |                                    | Montélukast                          |  | 47303                                                              |                     |                                              |
|  |                                    |                                      |  | 47302                                                              |                     |                                              |
|  |                                    |                                      |  | 46467                                                              |                     |                                              |
|  |                                    | Zafirlukast                          |  | 46401                                                              |                     |                                              |
|  |                                    |                                      |  | 47266                                                              |                     |                                              |
|  |                                    |                                      |  |                                                                    |                     |                                              |
|  |                                    |                                      |  |                                                                    |                     |                                              |
|  | <b>Gastro-intestinal disorders</b> | <b>AHFS class</b>                    |  | <b>(Example of sub-classes that are included in the 56. class)</b> |                     |                                              |
|  |                                    | 56.xx                                |  | 56:08                                                              | Antidiarrhea agents |                                              |

|                              |  |                             |                                                   |                                                                 |                                           |      |
|------------------------------|--|-----------------------------|---------------------------------------------------|-----------------------------------------------------------------|-------------------------------------------|------|
|                              |  |                             |                                                   | 56:14                                                           | Cholelitholytics                          |      |
|                              |  |                             |                                                   | 56:16                                                           | Digestives                                |      |
|                              |  |                             |                                                   | 56:22                                                           | Anti-emetics                              |      |
|                              |  |                             |                                                   | 56:28                                                           | Anti-acids                                |      |
|                              |  |                             |                                                   | 56:32                                                           | Prokinetics                               |      |
|                              |  |                             |                                                   | 56:36                                                           | Gastro-intestinal anti-inflammatory drugs |      |
|                              |  |                             |                                                   | 56:92                                                           | Miscellaneous                             |      |
|                              |  |                             |                                                   |                                                                 |                                           |      |
| <b>Anti-infective agents</b> |  | <b>AHFS class</b>           |                                                   | (Example of sub-classes that are included in the the 08. class) |                                           |      |
|                              |  | 08.xx                       |                                                   | 8:08                                                            | Anthelmintics                             |      |
|                              |  |                             |                                                   | 8:12                                                            | Antibacterials                            |      |
|                              |  |                             |                                                   | 8:14                                                            | Antifungals                               |      |
|                              |  |                             |                                                   | 8:16                                                            | Antimycobacterials                        |      |
|                              |  |                             |                                                   | 8:18                                                            | Antivirals                                |      |
|                              |  |                             |                                                   | 8:30                                                            | Antiprotozoals                            |      |
|                              |  |                             |                                                   | 8:36                                                            | Urinary Anti-infectives                   |      |
|                              |  |                             |                                                   | 9:32                                                            | Anti-Infectives, Miscellaneous            |      |
|                              |  |                             |                                                   |                                                                 |                                           |      |
|                              |  |                             |                                                   |                                                                 |                                           |      |
| <b>Antineoplastic agents</b> |  | <b>AHFS class</b>           |                                                   |                                                                 |                                           |      |
|                              |  | 10.xx                       |                                                   |                                                                 |                                           |      |
|                              |  |                             |                                                   |                                                                 |                                           |      |
|                              |  |                             |                                                   |                                                                 |                                           |      |
| <b>Pain</b>                  |  | <b>AHFS subclass</b>        |                                                   |                                                                 |                                           |      |
|                              |  | 28:08                       | Analgesic and antipyretics (NSAIDs, opioids, etc) |                                                                 |                                           | SAUF |
|                              |  | <b>Specific medications</b> |                                                   | <b>Codes denomination commune</b>                               |                                           |      |
|                              |  | Cyclobenzaprine             |                                                   | 46516                                                           |                                           |      |
|                              |  |                             |                                                   | 38873                                                           |                                           |      |

1  
2  
3  
4  
5  
6  
7  
8  
9  
10  
11  
12  
13  
14  
15  
16  
17  
18  
19  
20  
21  
22  
23  
24  
25  
26  
27  
28  
29  
30  
31  
32  
33  
34  
35  
36  
37  
38  
39  
40  
41  
42  
43  
44  
45  
46  
47  
48  
49  
50  
51  
52  
53  
54  
55  
56  
57  
58  
59  
60

|                                                                                                                 |                       |               |       |            |  |  |  |
|-----------------------------------------------------------------------------------------------------------------|-----------------------|---------------|-------|------------|--|--|--|
|                                                                                                                 |                       | Baclofene     |       | 41447      |  |  |  |
|                                                                                                                 |                       |               |       | 46337      |  |  |  |
|                                                                                                                 |                       | Orphenadrine  |       | 46094      |  |  |  |
|                                                                                                                 |                       |               |       | 46254      |  |  |  |
|                                                                                                                 |                       |               |       | 6734       |  |  |  |
|                                                                                                                 |                       |               |       |            |  |  |  |
|                                                                                                                 | <b>Contraceptives</b> | AHFS subclass | 68:12 | Anovulants |  |  |  |
|                                                                                                                 |                       |               |       |            |  |  |  |
| Not included: Glaucoma, Osteoporosis, ear/eyes/nose drugs, corticosteroids, skin medications, Parkinson disease |                       |               |       |            |  |  |  |

For peer review only

## APPENDIX I\_2: LIST OF THE CANDIDATE INDICATORS AT THE PROGRAMMATIC AND SYSTEM LEVELS SUPPORTED BY THE HEALTH SERVICES AND PUBLIC HEALTH LITERATURE OR PRACTICES

**TABLE 2**  
List of the candidate indicators at the programmatic and system levels supported by the health services and public health literature or practices

| Candidate indicators                                                                                  | Aim                                                                                                                      | Literature support                                                                                                                                                        | Description                                                                                                                                                                                                                       | Measure                                                                                                                                      | Data sources                                                       |
|-------------------------------------------------------------------------------------------------------|--------------------------------------------------------------------------------------------------------------------------|---------------------------------------------------------------------------------------------------------------------------------------------------------------------------|-----------------------------------------------------------------------------------------------------------------------------------------------------------------------------------------------------------------------------------|----------------------------------------------------------------------------------------------------------------------------------------------|--------------------------------------------------------------------|
| 1. Quality of anxiety or depressive disorders mental health services follow-up in primary care        | Determine adequate care for patient diagnosed with anxiety and depressive disorders in primary care                      | Based on number of physician visits by Wang, et al. <sup>44</sup> and other studies <sup>47,48</sup>                                                                      | Denominator: Individuals aged 15+ years with an anxiety or depressive disorder diagnosis by a General Practitioner (GP) in a given year<br><br>Numerator: Received ≥ 4 visits for mental health in that year                      | Prevalence of individuals 15+ years who received an anxiety or depressive disorder diagnosis with ≥ 4 visits for mental health               | QICDSS                                                             |
| 2. Quality of depression disorder mental health services follow-up in primary care                    | Determine adequate care for patient diagnosed with depression in primary care                                            | Based on number of physician visits by Wang, et al. <sup>44</sup> and other studies <sup>47,48</sup>                                                                      | Denominator: Individuals aged 15+ years with a diagnosis of depression by a General Practitioner (GP) in a given year<br><br>Numerator: Received ≥ 4 visits for mental health in that year                                        | Prevalence of individuals 15+ years who received a depression diagnosis with ≥ 4 visits for mental health                                    | QICDSS                                                             |
| 3. Quality of substance use disorder mental health services follow-up in primary care                 | Determine adequate care for patient diagnosed with substance use disorder in primary care                                | Based on 4 visits with a family physician for counseling as recommended by NICE <sup>56</sup> and the guidelines for American primary care clinicians <sup>58</sup>       | Denominator: Individuals aged 15+ years with a diagnosis of substance use disorder by a General Practitioner (GP) in a given year<br><br>Numerator: Received ≥ 4 visits for mental health in that year                            | Prevalence of individuals 15+ years who received a substance use disorder diagnosis with ≥ 4 visits for mental health                        | QICDSS                                                             |
| 4. Quality of mental health care services follow-up after hospitalization: readmission within 30 days | Determine the quality of mental specialist health care and in-hospital care                                              | Based on the work of the Canadian Institute for Health Information (CIHI) <sup>45,47,48</sup>                                                                             | Denominator: Individuals aged 15+ years admitted in a hospital with a mental health diagnosis in a given year<br><br>Numerator: Individual readmitted for mental health within 30 days of initial discharge                       | Prevalence of individuals 15+ years who were readmitted to a hospital for a mental health diagnosis within 30 days of initial discharge      | QICDSS                                                             |
| 5. Quality of mental health services follow-up in primary care after suicide attempt                  | Determine the quality of mental health care of readmission rates in the region compared to others                        | Based on the work of the Canadian Institute for Health Information (CIHI) <sup>45,47,48</sup>                                                                             | Denominator: Individuals aged 15+ years admitted to a hospital for suicide attempt in a given year<br><br>Numerator: Received ≥ 1 visit to a physician for mental health within 30 days of hospital discharge for suicide attempt | Prevalence of individuals 15+ years who received ≥ 1 visit from a physician within 30 days of initial discharge for suicide attempt          | QICDSS (linked to MedEcho for suicide attempt) <sup>40,41,50</sup> |
| 6. Quality of community mental health services                                                        | Determine the balance of the community-oriented mental health care system                                                | Based on the typologies of primary and specialist (including in-hospital care) mental health care <sup>45,46,54</sup> used in the study of suicide attempts <sup>55</sup> | Denominator: Individuals aged 15+ years with a mental health diagnosis in a given year<br><br>Numerator: Individuals with exclusively outpatient services – psychiatric or general practitioner (GP)                              | Prevalence of individuals 15+ years who received a mental health disorder diagnosis with exclusively outpatient services (psychiatric or GP) | QICDSS                                                             |
| 7. Quality of community mental health services of patients with severe mental illness                 | Determine the balance of psychiatric outpatient and primary outpatient care depending on the profiles used <sup>45</sup> | Based on the associations found for the balance between primary and specialist mental health care and suicide rates <sup>2,46,60,61</sup>                                 | Denominator: Individuals aged 15+ years with exclusively a GP or a psychiatric outpatient visit for psychotic disorder<br><br>Numerator: Number of individuals with exclusively a GP or psychiatrist outpatient visits            | Prevalence of individuals 15+ years who received a severe mental illness disorder diagnosis and used exclusively outpatient services by a GP | QICDSS                                                             |
| 8. Quality of community mental health services of patients with common mental disorders               | Determine the balance of psychiatric outpatient and primary outpatient care depending on the profiles used <sup>45</sup> | Based on the associations found for the balance between primary and specialist mental health care and suicide rates <sup>2,46,60,61</sup>                                 | Denominator: Individuals aged 15+ years with a psychiatric or a GP outpatient visit for depression<br><br>Numerator: Number of individuals with exclusively GP outpatient visits                                                  | Prevalence of individuals 15+ years who received a common mental disorder diagnosis and used exclusively outpatient services by a GP         | QICDSS                                                             |

Continued on the following page

**TABLE 2 (continued)**  
**List of the candidate indicators at the programmatic and system levels supported by the health services and public health literature or practices**

| Candidate indicators                                                                    | Aim                                                                                                                                           | Literature support                                                                                                                        | Description                                                                                                                                                                                                             | Measure                                                                                                                                  | Data sources                                                                                         |
|-----------------------------------------------------------------------------------------|-----------------------------------------------------------------------------------------------------------------------------------------------|-------------------------------------------------------------------------------------------------------------------------------------------|-------------------------------------------------------------------------------------------------------------------------------------------------------------------------------------------------------------------------|------------------------------------------------------------------------------------------------------------------------------------------|------------------------------------------------------------------------------------------------------|
| 9. Quality of community mental health services of patients with substance use disorders | Determine the balance of psychiatric outpatient and primary outpatient care depending on the profiles used <sup>5,55</sup>                    | Based on the associations found for the balance between primary and specialist mental health care and suicide rates <sup>2,46,60,61</sup> | Denominator: Individuals aged 15+ years with a psychiatric or a GP outpatient visit for substance use disorder<br><br>Numerator: Number of individuals with exclusively GP outpatient visits                            | Prevalence of individuals 15+ years who received a substance use disorder diagnosis and used exclusively outpatient services by a GP     | QICDSS                                                                                               |
| 10. Quality of community mental health services of patients with personality disorders  | Determine the balance of psychiatric outpatient and primary outpatient care depending on the profiles used <sup>5,55</sup>                    | Based on the associations found for the balance between primary and specialist mental health care and suicide rates <sup>2,46,60,61</sup> | Denominator: Individuals aged 15+ years with exclusively a GP or a psychiatric outpatient visit for personality disorder<br><br>Numerator: Number of individuals with exclusively a GP or psychiatric outpatient visits | Prevalence of individuals 15+ years who received a personality disorder diagnosis and used exclusively outpatient services by a GP       | QICDSS                                                                                               |
| 11. Adequate use of emergency room for mental health services                           | Determine the balance of utilization of emergency room (ER) for mental health reasons <sup>5,55</sup>                                         | Based on the associations found for the balance between primary and specialist mental health care and suicide rates <sup>46,60,61</sup>   | Denominator: Individuals aged 15+ years with a diagnosis of a mental health disorder<br><br>Numerator: Number of individuals with ER visits without being admitted                                                      | Prevalence of individuals 15+ years who received a diagnosis of mental health disorder with exclusively ER visits without being admitted | QICDSS                                                                                               |
| 12. Program expenditures for mental health services                                     | Determine the strength of the relationship between changes in suicide rates and expenditures for mental health (regional and provincial)      | Based on associations found between mental health budget and suicide rates <sup>21,23</sup>                                               | Refer to the Gouvernement du Québec <sup>43</sup>                                                                                                                                                                       | Dollars per capita spent on mental health programs (provincial and regional)                                                             | Annual financial reports from the Ministère de la santé et des services sociaux (MSSS) <sup>43</sup> |
| 13. Program expenditures for addiction services                                         | Determine the strength of the relationship between changes in suicide rates and expenditures for addiction services (regional and provincial) | Based on associations found between mental health budget and suicide rates <sup>21,23</sup>                                               | Refer to the Gouvernement du Québec <sup>43</sup>                                                                                                                                                                       | Dollars per capita spent on health programs for addiction services (provincial and regional)                                             | Annual financial reports from the MSSS <sup>43</sup>                                                 |

**Abbreviations:** CIHI, Canadian Institute for Health Information; ER, emergency room; GP, general practitioner; MSSS, Ministère de la santé et des services sociaux; QICDSS, Quebec Integrated Chronic Disease Surveillance System.

<sup>1</sup> Profile 1: psychiatric inpatient care; profile 2: hospital emergency room (ER); profile 3: psychiatric outpatient care; profile 4: general practitioner (GP) clinics; and profile 5: other medical specialist.

# BMJ Open

## A case-control study on predicting population risk of suicide using health administrative data: A research protocol

|                                 |                                                                                                                                                                                                                                                                                                                                                                                                                                                                                                                                                                                                                                                                                                                                                                                                                                                                                                                                                                                    |
|---------------------------------|------------------------------------------------------------------------------------------------------------------------------------------------------------------------------------------------------------------------------------------------------------------------------------------------------------------------------------------------------------------------------------------------------------------------------------------------------------------------------------------------------------------------------------------------------------------------------------------------------------------------------------------------------------------------------------------------------------------------------------------------------------------------------------------------------------------------------------------------------------------------------------------------------------------------------------------------------------------------------------|
| Journal:                        | <i>BMJ Open</i>                                                                                                                                                                                                                                                                                                                                                                                                                                                                                                                                                                                                                                                                                                                                                                                                                                                                                                                                                                    |
| Manuscript ID                   | bmjopen-2022-066423.R1                                                                                                                                                                                                                                                                                                                                                                                                                                                                                                                                                                                                                                                                                                                                                                                                                                                                                                                                                             |
| Article Type:                   | Protocol                                                                                                                                                                                                                                                                                                                                                                                                                                                                                                                                                                                                                                                                                                                                                                                                                                                                                                                                                                           |
| Date Submitted by the Author:   | 16-Nov-2022                                                                                                                                                                                                                                                                                                                                                                                                                                                                                                                                                                                                                                                                                                                                                                                                                                                                                                                                                                        |
| Complete List of Authors:       | Wang, JianLi; Dalhousie University, Department of Community Health and Epidemiology<br>Gholi Zadeh Kharrat, Fatemeh; Laval University, Department of Electrical Engineering and Computer Engineering<br>Pelletier, Jean-François; University of Montreal, Department of Psychiatry<br>Rochette, Louis ; Institut national de sante publique du Quebec<br>Pelletier, Eric; INSPQ<br>Lévesque, Pascale; Institut national de santé publique du Québec (INSPQ)<br>Massamba, Victoria; Institut national de santé publique du Québec (INSPQ)<br>Brousseau-Paradis, Camille; University of Montreal, Department of Psychiatry<br>Mohammed, Mada; Dalhousie University, Department of Community Health and Epidemiology<br>Gariépy, Geneviève; Public Health Agency of Canada; University of Montreal, Department of Social and Preventive Medicine<br>Gagné, Christian; Laval University, Electrical Engineering<br>Lesage, Alain ; Institut universitaire en sante mentale de Montreal |
| <b>Primary Subject Heading</b>: | Mental health                                                                                                                                                                                                                                                                                                                                                                                                                                                                                                                                                                                                                                                                                                                                                                                                                                                                                                                                                                      |
| Secondary Subject Heading:      | Public health                                                                                                                                                                                                                                                                                                                                                                                                                                                                                                                                                                                                                                                                                                                                                                                                                                                                                                                                                                      |
| Keywords:                       | Suicide & self-harm < PSYCHIATRY, PUBLIC HEALTH, PSYCHIATRY, HEALTH SERVICES ADMINISTRATION & MANAGEMENT                                                                                                                                                                                                                                                                                                                                                                                                                                                                                                                                                                                                                                                                                                                                                                                                                                                                           |
|                                 |                                                                                                                                                                                                                                                                                                                                                                                                                                                                                                                                                                                                                                                                                                                                                                                                                                                                                                                                                                                    |

SCHOLARONE™  
Manuscripts



## A case-control study on predicting population risk of suicide using health administrative data: A research protocol

JianLi Wang,<sup>1</sup> Fatemeh Gholi Zadeh Kharrat,<sup>2</sup> Jean-François Pelletier,<sup>3</sup> Louis Rochette,<sup>4</sup> Eric Pelletier,<sup>4</sup> Pascale Lévesque,<sup>4</sup> Victoria Massamba,<sup>4</sup> Camille Brousseau-Paradis,<sup>3</sup> Mada Mohammed,<sup>1</sup> Geneviève Gariépy,<sup>5,6,7</sup> Christian Gagne,<sup>2</sup> Alain Lesage<sup>3,7</sup>

1. Department of Community Health and Epidemiology, Faculty of Medicine, Dalhousie University.
2. Department of Electrical Engineering and Computer Engineering, Laval University.
3. Department of Psychiatry, University of Montreal, QC, Canada.
4. Institut national de santé publique du Québec (INSPQ), Quebec City, Quebec, Canada.
5. Centre for Surveillance and Applied Research, Health Promotion and Chronic Disease Prevention Branch, Public Health Agency of Canada, Ottawa, Canada
6. Department of Social and Preventive Medicine, School of Public Health, University of Montreal, Montreal, Canada
7. Research Center, Institut universitaire de santé mentale de Montréal. Montreal, Canada.

Corresponding author:

JianLi Wang

5790 University Ave.

Department of Community Health and Epidemiology

Faculty of Medicine, Dalhousie University

[Jianli.wang@dal.ca](mailto:Jianli.wang@dal.ca)

## Abstract

**Introduction:** Suicide has a complex etiology and is a result of the interaction among the risk and protective factors at the individual, healthcare system, and population levels. Therefore, policy and decision makers and mental health service planners can play an important role in suicide prevention. Although a number of suicide risk predictive tools have been developed, these tools were designed to be used by clinicians for assessing individual risk of suicide. There have been no risk predictive models to be used by policy and decision makers for predicting population risk of suicide at the national, provincial and regional levels. This paper aimed to describe the rationale and methodology for developing risk predictive models for population risk of suicide.

**Methods and analysis:** A case-control study design will be used to develop sex-specific risk predictive models for population risk of suicide, using statistical regression and machine learning techniques. Routinely collected health administrative data in Quebec, Canada, and community level social deprivation and marginalization data will be used. The developed models will be transformed into the models that can be readily used by policy and decision makers. Two rounds of qualitative interviews with end-users and other stakeholders were proposed to understand their views about the developed models and potential systematic, social and ethical issues for implementation; the first round of qualitative interviews have been completed. We included 9440 suicide cases (7234 males and 2206 females) and 661,780 controls for model development. Three hundred and forty seven variables at individual, healthcare system and community levels have been identified and will be included LASSO regression for feature selection.

**Ethics and dissemination:** This study is approved by the Health Research Ethics Committee of Dalhousie University, Canada. This study takes an integrated knowledge translation approach, involving knowledge users from the beginning of the process.

**Strengths and limitations of this study:**

- This study will use routinely collected health administrative data, which are readily accessible to policy and decision makers.
- The candidate predictors include variables at individual, healthcare system and community levels, which reflect the complex etiology of suicide.
- The methodology of model development and validation needs to be improved.
- Some individuals in the control group might have suicide behaviors, which could not be ascertained by health administrative data.
- Important factors such as education, employment and income are not routinely collected by health administrative databases, which is a limitation of this study.

## Introduction

Suicide is a major international public health problem. Each year, over 4,500 Canadians take their own life,(1) and more than 700,000 people die because of suicide worldwide,(2) imposing enormous impacts on families, communities and societies. As such, suicide prevention has been a top priority of many countries.

Suicide has a complex etiology and is a result of the interaction among the risk and protective factors at the individual, healthcare system, and population levels.(3–10) Therefore, policy and decision makers and mental health service planners can play an important role in suicide prevention. To facilitate suicide prevention planning, mechanisms should be in place that enable policy and decision makers to make informed decisions and mobilize resources to high-risk populations at the right places, before tragic events occur. This vision requires us to shift the paradigm from predicting individual risk to predicting population risk of suicide. However, the existing suicide risk assessment/predictive tools are not suitable for predicting population risk. Most of the existing risk assessment/risk predictive tools for suicide were designed to be used by clinicians; they were not designed for policy and decision makers.(11) Clinicians often use these tools to determine if individual patients are at high risk of suicide presently or in short term (e.g., next week). Whereas policy and decision makers are more concerned about the rate of suicide at the community level (e.g., health regions, provinces/states) in the medium or long term (e.g., in the next 5 or 10 years), driven partly by budgetary decisions that are often made on a yearly basis. Clinicians and policy/decision makers may have different emphases on risk predictive tools as well. For clinicians, an ideal suicide risk predictive tool should have high discriminative power (e.g., a large C statistics), high sensitivity, specificity and positive predictive value. For policy and decision makers, a tool with excellent calibration (i.e., how closely the predicted risk agrees with actual risk in the population) is more useful. To facilitate policy development in suicide prevention at the population level, risk predictive models specifically designed for policy and decision makers are needed.

Ideally, risk predictive models for population risk of suicide are based on large data from the target population. For example, Gradus and colleagues developed sex-specific machine learning algorithms for suicide using data from eight Danish national health and social registries which cover more than 90% of the Danish population.(12) Kessler et al.'s machine learning (ML) algorithms targeted US Army soldiers who were hospitalized.(13) Accordingly, these risk predictive algorithms may potentially be used for forecasting the risk of suicide in Danish general population and in the US Army population, respectively. Furthermore, predictive models for population risk may use not only individual data, but also health system level (e.g., quality of mental health care, mental health budget), and community level data (e.g., unemployment rate and social deprivation levels in the community). For instance, Marks and colleagues developed a predictive model for identifying counties at high risk of overdose mortality, which included county-level education, poverty rate, unemployment rate, overdose gravity, and other county-level indicators, among the 3106 counties in the United States.(14) Given the complex etiology of suicide, predicting population risk of suicide may benefit greatly from the integration of data at the individual, health system and community levels.

1  
2  
3  
4 We undertook a project to develop and validate sex-specific risk predictive models to be used  
5 by policy and decision makers to forecast population risk of suicide at the health region level,  
6 using routinely collected health administrative data, and to identify the barriers and facilitators  
7 to implementation and explore the ethical and privacy issues of the prediction program. In this  
8 manuscript, we aimed to describe the methodology of the project, to inform methodological  
9 discussions and suicide prevention strategies.  
10  
11

## 12 13 **Methods**

14  
15 This project encompasses the components of quantitative and qualitative investigations and an  
16 integrated knowledge translation (IKT). IKT is a model of research co-production, whereby  
17 knowledge users are integrated throughout the research process and who can use the research  
18 recommendations in practice or policy.<sup>(15)</sup> IKT approaches are used to improve the relevance  
19 and impact of research. The quantitative research involved developing and validating risk  
20 prediction models for suicide using advanced ML and visualization methods. The qualitative  
21 research is to understand the potential implementation, social, ethics and legal issues  
22 associated with the risk prediction program. In line with IKT principles, we involved policy and  
23 decision makers at the provincial and national levels, and people with lived experience of  
24 suicidality from the beginning of the project. The methodology of each component is described  
25 below.  
26  
27  
28  
29

### 30 ***Model development and validation***

31 *Target population:* The general population residing in the province of Quebec, Canada. The  
32 province had a population of over 8.6 million people in 2021, and about 95% of the population  
33 reported being able to conduct a conversation in French. In Quebec, health services are  
34 planned and delivered through 18 health regions, 22 integrated health and social services  
35 centres, and 166 Centres locaux de santé Communautaire (CLSCs). Budgetary decisions are  
36 made at the levels of province and health regions/integrated health and social services centres.  
37  
38  
39

40 *Data sources:* We will develop the prediction tools by linking the suicide database, the Ministry  
41 of Health and Social Services (MSSS) public financial reports (Contour financier - Publications du  
42 ministère de la Santé et des Services sociaux (gouv.qc.ca) which include the five health  
43 administrative databases below, and the Canadian Urban Environmental Health Research  
44 (CANUE) data. The suicide database gathers individual-level data annually based on residents  
45 health insurance number from five administrative databases: the vital statistics death database,  
46 the physician claims database, the hospital discharge database, the Insured Person Registration  
47 File and the public drug plan. The data of these databases (e.g., billing and service procedures  
48 codes, service dates) are routinely submitted by clinics and hospitals for billing and  
49 administration purposes; no self-reported data were collected from patients. These databases  
50 cover up to 98% of the population in Quebec and contain data for over 20,000 death by suicide  
51 cases occurred since 1996. Death by suicide cases were those ascertained by Quebec's Coroner  
52 office after investigation. The decision is registered in the Quebec vital statistics database. The  
53 latter is linked with other health administrative databases of the Quebec Integrated Chronic  
54  
55  
56  
57

1  
2  
3 Disease Surveillance System (QICDSS) managed by the Quebec's Public Health Agency.(16) With  
4 the suicide database and other linkable Ministry financial databases, individual (e.g., sex, age),  
5 program (e.g., hospitalization, emergency department visits), and system (e.g., mental health  
6 and addiction budgets) level indicators can be identified.(17)  
7  
8

9 CANUE is a Canadian consortium aiming to build a unique repository of standardized metrics of  
10 urban, sub-urban, and rural characteristics, as well as the tools used to produce them  
11 ([www.canue.ca](http://www.canue.ca)). The CANUE data contain indicators for unemployment, social deprivation,  
12 access to health services and built environment at the community level, and can be linked with  
13 health administrative data by postal codes. The CANUE is open and free for research projects.  
14 The data linkage was performed at the Quebec Institute of Public Health (INSPQ) where the  
15 suicide data are kept. Linking the databases provides an unprecedented sample size and the  
16 capability of examining individual, neighborhood, programmatic and systemic indicators of  
17 population suicide risk.  
18  
19  
20

21 Because this study used existing de-identified health administrative data, informed consent  
22 from individual patients was waived. This study was approved by the Research Ethics Board of  
23 Dalhousie University.  
24  
25

26 *Study design:* Because the base rate of suicide in the population is low, we proposed to use a  
27 case-control study design to develop sex-specific suicide risk predictive algorithms, using both  
28 logistic regression modeling and machine learning (ML) techniques. We selected all death by  
29 suicide cases that occurred from January 1<sup>st</sup> 2002 to December 31<sup>st</sup> 2010.(18) The control group  
30 was a 1% random sample of living individuals in Quebec each year, identified from the suicide  
31 database. The cases and controls were not matched to allow for maximum variability in  
32 predictors.  
33  
34  
35

36 *Predictors:* Individual, programmatic, systemic and community factors (see Appendix I)  
37 happened five years prior to the suicide events will be used as candidate predictors to develop  
38 the risk predictive algorithms. For example, we extracted the data about the diagnosis of major  
39 depression (an individual level factor) in the past 6, 12, 24, 48 and 60 months, as 5 separate  
40 candidate predictors. Similarly, we extracted mental health and addiction budget of each health  
41 region (a systemic level factor) in the past 5 years as candidate predictors. The QICDSS(16)  
42 provided all the variables drawn from health administrative databases. It covers 98% of the  
43 Quebec's population since 1996. The security and continuous quality and maintenance are the  
44 responsibility of the Quebec Public health Institute (INSPQ). Information is for administrative  
45 (i.e. age, hospital or outpatient contact dates) and clinician reporting (i.e. diagnoses) purposes.  
46 Validation of QICDSS physical diagnoses has been achieved by chart reviews(16) and by  
47 outcomes for QICDSS psychiatric diagnoses.(19,20) The QICDSS has been exploited over the  
48 past decade by a network of INSPQ officers and academic researchers, many are co-authors of  
49 publications on the characteristics of patients receiving rare psychiatric interventions,(21) and  
50 on personality disorders, schizophrenia and substance use disorders in relation to mortality,  
51 including suicide.(22,23) The quality of the data is also reflected by the minimal missing data  
52  
53  
54  
55  
56  
57  
58  
59  
60

1  
2  
3 associated with the variables, which ranges from 0.87% and 4.12% of the variables in the  
4 databases.

5  
6 The initial selection of candidate predictors is determined by content knowledge (i.e.,  
7 known relationships between suicide or suicide behaviors and individual and local area level  
8 variables), feasibility of routine data collection, clinical utility and policy relevance through team  
9 meetings. Therefore, the pre-determination of candidate predictors was a joint effort between  
10 the team members, collaborators, health policy and decision makers and other stakeholders,  
11 with the expertise of clinical psychiatry, psychiatric epidemiology, mental health services  
12 research, health administrative data, computer science, and mental health policy.

13  
14 For the objective of this study, we will use both statistical (e.g., logistic regression  
15 modeling) and machine learning (ML) approaches to develop the risk prediction models so that  
16 we may compare which approach performs better in predicting population suicide risk and is  
17 more feasible to implement. ML can produce complex estimations by searching data for  
18 relevant pieces of information and their complex interactions. Therefore, ML is best suited to  
19 tackle the combined challenges of high dimensional data analysis associated with risk  
20 prediction for suicide. Some predictors that may change over time (e.g., diagnoses,  
21 medications, service use, etc.) will be dummy-coded to create time-varying predictors (i.e.,  
22 intervals of 0-3,0-6, 0-12, 0-24, 0-36,0-48, and 0-60 months before the first day of the suicide  
23 month). Because we included all suicide cases and a sample of controls, the proportion of  
24 suicide in the sample is different from that in the general population. Therefore, sampling  
25 weights (inversed probability of being selected) were assigned to the controls, while the weight  
26 of 1 was assigned to the cases, to ensure the models are applicable to the whole population.  
27  
28  
29  
30

### 31 *Model development – Machine learning (ML).*

32 ML is a part of Artificial intelligence (AI) that aims to construct systems that automatically  
33 improve through experience using advanced statistical and probabilistic techniques. ML has  
34 provided significant benefits to a range of fields. Recent research has shown a range of  
35 advantages of ML that can assist in detecting, diagnosing, predicting suicide, and treating  
36 mental health problems.(24,25) ML methods are divided into categories, i.e., supervised, semi-  
37 supervised, unsupervised, and reinforcement.  
38  
39

40 Imbalanced classes are a common problem in ML classification, where each class has a  
41 disproportionate ratio of observations. To predict the population risk of suicide, Dataset will be  
42 imbalanced because of rare cases of suicide as compared with a control group. To address the  
43 imbalanced Dataset, we will over-sample the minority class. We will "artificially" duplicate  
44 samples from the minority class to over-sample the minority class to correct imbalanced  
45 datasets, even though doing so does not provide the model with any new data. In the  
46 literature, this method was known as the Synthetic Minority Over-sampling Technique  
47 (SMOTE). Then, we will develop supervised learning models such as logistic regression, Random  
48 Forest, XGBoost, and Multilayer perceptron with an optimized model architecture. These  
49 models' predictive capacity will be assessed by generating the receiver operating characteristic  
50 (ROC) curves calculating its AUC and various operating characteristics, including sensitivity,  
51 specificity, and positive predictive value for a variety of thresholds.  
52  
53

54 Interpretability is essential when we deal with healthcare data. It is significant because it  
55 is necessary to understand the casualty of learned representations for decision support also  
56  
57

1  
2  
3 helps to assess whether the model is considering the right features while making a specific  
4 prediction. Feature-based model explainability technique, such as Shapley Additive  
5 Explanations (SHAP), was derived from game theory; each player decides to contribute to a  
6 coalition of players to produce a total value that will be superior to the sum of their individual  
7 values. SHAP relies on the Shapley value of both local and global explanations. Shapley's values  
8 are model-agnostic, and the marginal contribution of each feature can be calculated by using  
9 the input data and the predictions.(26,27) SHAP will use with the global explanation of how  
10 much the input features contribute to a model's output.  
11  
12  
13

#### 14 Model development – logistic regression.

15

16  
17 As the first step of model development, we will include all pre-selected variables in penalized  
18 least absolute shrinkage and selection operator (LASSO) regression. The LASSO penalization  
19 factor selects important predictors by shrinking coefficients for weaker predictors toward zero,  
20 excluding predictors with estimated zero coefficients from the final sparse prediction model.  
21 We will perform a correlation analysis among variables selected by the LASSO regression, and  
22 identify variables that are strongly correlated (e.g.,  $\gamma \geq 0.60$ ). Correlated variables will be  
23 discussed by team members, and the variables that have better policy implication and clinical  
24 utility will be kept and become the candidate predictors for model development.  
25  
26

27  
28 We will use fixed effect logistic regression to develop the sex-specific statistical models that  
29 accounted for clustering at the health regions by including a variable of health region. After  
30 LASSO, there may still be a large number of candidate predictors. Backward selection method  
31 will be used to eliminate uninformative variables and to identify the model with the best  
32 calibration and discrimination. The decisions of model selection will be initially based on the  
33 changes in the values of Akaike Information Criterion (AIC) and Bayesian Information Criterion  
34 (BIC).(28) Since BIC penalizes for the complexity of the model more than AIC, selection with BIC  
35 will generally lead to smaller models than selection with AIC.(28) Once a model is developed,  
36 prediction accuracy will be assessed by the discrimination and calibration of the model.  
37 Discrimination is the ability of a prediction model to separate those who experienced the  
38 outcome events from those who did not. We will quantify this by calculating the C statistic,  
39 analogous to the area under a receiver operating characteristic curve. Calibration measures  
40 how closely predicted outcomes agree with actual outcomes. For this, we will use D'Agostino's  
41 version of the Hosmer-Lemeshow Chi square statistic. Discrimination and calibration compete  
42 with each other. Given that the program will be used to forecast population risk of suicide, we  
43 will prioritize calibration over discrimination. Stakeholders from different perspectives and  
44 scientific backgrounds will meet to determine the content and performance of the risk  
45 prediction models developed by statistical and ML techniques, the appropriate formats of data  
46 visualization that are acceptable to policy and decision makers, and the feasibility of  
47 implementation, which will in turn inform the revision of the models.  
48  
49  
50  
51

52 The second step of the model development is to estimate the synthetic rates, consisting  
53 of two stages. First, for each predictor, the proportions of individuals within each category of  
54 that predictor in the initial modeling will be computed, separately by regions. For instance, if  
55 hospitalization due to suicide attempt in the past 5 years is a predictor in the model, the  
56  
57

1  
2  
3 proportion of individuals with this attribute in a specific health region is calculated. If age is a  
4 continuous variable in the model, the mean age of the population in a health region is  
5 estimated. A syntax program will then be prepared to apply the regression coefficients to the  
6 corresponding proportions and means in the data set, and to calculate the logit estimates for  
7 each of health regions. The resulting logit values for each of the health region will then be  
8 converted into probabilities, giving the estimated risk of suicide in the health region. The  
9 region's population counts from Statistics Canada Census data or the provincial health  
10 administrative database multiplied by the estimated risk will yield the estimated number of  
11 suicide in this health region.  
12  
13

14 The fitted logistic regression model described above estimates the proportion of suicide  
15 in the population at a given moment of time as a function of its risk factors in the past. This  
16 model is fundamentally etiologic, where the natural reference-point is the moment of the  
17 outcome's occurrence, corresponding to the zero time on the etiologic time scale. However,  
18 assessment of population risk of suicide over a particular span of time in the future involves a  
19 prognostic outlook, where the natural reference-point is the time of prognostication,  
20 corresponding to the zero time on the prognostic time scale. Predictive models for individual  
21 risk are often developed using a cohort/closed study-population and express the risk of future  
22 occurrence of the outcome as a function of current risk factors, and involves consideration of  
23 the values of the risk factors at issue at the prognostic time zero only. Whereas population risk  
24 models are applied in the context of a dynamic/open population and the estimated risk is a  
25 function of risk factors not only at the prognostic time-zero but also throughout the time span  
26 at issue. For example, the risk of suicide in the next 5 years in a health region may not only  
27 depend on the proportions of people with major depression and of hospitalization due to  
28 suicide attempt in the past, but also on whether there will be a reduction or increase in these  
29 parameters over the next 5 years, if so in which year. Thus, the population risk of suicide may  
30 be projected using the developed model to each future year over a pre-defined time interval.  
31 The cumulative incidence of suicide (CI<sub>0 to t</sub>) from time T = 0 to T = t can be estimated as a  
32 function of time- and profile specific risk operating over that time interval:(29)  
33  
34  
35  
36  
37  
38

$$39 \quad CI_{0 \text{ to } t} = 1 - \exp \left[ - \int_0^t (ID_u) du \right]$$

40  
41  
42  
43  
44 The estimated cumulative risk represents the estimated risk of suicide of a health region over  
45 the time period at issue conditionally on the health region's risk profile.  
46

#### 47 Validation:

48  
49  
50 For model validation, we will use the suicide data from January 1<sup>st</sup>, 2011 to December 31<sup>st</sup>,  
51 2019. We will first calculate the yearly, 5-year and 10-year incidence of suicide death at the  
52 provincial and health regional levels in males and females (i.e., observed risk). We will apply the  
53 developed synthetic models in the validation data to estimate the yearly, 5-year and 10-year  
54 incidence of suicide death at the provincial and health regional levels in males and females (i.e.,  
55  
56  
57  
58  
59  
60



1  
2  
3 predicted risk). We will visually compare and calculate the differences between the predicted  
4 and observed risks; smaller differences indicate better calibration with the data and model  
5 accuracy. We will use four indicators for assessing model performance: mean average error  
6 (MAE), root mean square error (RMSE), Spearman's  $r$ , and proportion of correct identification  
7 of high risk regions.(14) The MAE is the average magnitude of the difference between the  
8 predicted and observed suicide death rate for each health region. The RMSE is the square root  
9 of the average magnitude of the difference squared, therefore is similar to MAE but penalises  
10 prediction errors with greater magnitude. More accurate predictions will result in smaller MAE  
11 and RMSE. Spearman's  $r$  compares the predicted ranking of health regions by suicide death rate  
12 compared with the actual observed rankings; results closer to 1 indicate that the model was  
13 more effective at rank-ordering regions based on suicide death rate. To assess the extent to  
14 which high risk regions are correctly identified, we will first disaggregate the predicted and  
15 observed suicide rates into quartile groups and categorised all health regions into their  
16 corresponding quartiles for both predicted and observed suicide rates. The proportion of health  
17 regions observed in the top quartile of observed suicide death rates that were rightly predicted  
18 to be in the top quartile will be calculated.

### 23 24 **Qualitative study**

25 The objective of the qualitative study is to investigate the end-users' views about predicting  
26 population risk of suicide, and the potential social, legal, ethical, and privacy issues and  
27 mitigation strategies for implementing such a predictive system. Using snowballing techniques,  
28 we have invited policy and decision makers at the federal and provincial levels, mental health  
29 professionals, individuals who have extensive experience in working with policy and decision  
30 makers and who have expertise in suicide prevention, social and health policy, as well as health  
31 administrative data, people with lived experience, and advocates for families bereaved by  
32 suicide. The qualitative study consists of two rounds of interviews. The first round of interviews  
33 were carried out after the general team meeting held in July 2021, at which the study design  
34 was finalized. The second round of interviews will be organized once the predictive models are  
35 developed. The first round interviews were held through zoom meetings, and follow a series of  
36 semi-structured interview questions related to the objectives (see supplementary file#1).  
37 Qualitative data collected during the focus groups and qualitative interviews are audio  
38 recorded, transcribed, and analyzed with the support of QDA Miner (Provalis).(30) The second  
39 round of interviews will be conducted once the prototype models are developed and presented  
40 at the second general team meeting which is to be held in late 2022. We will perform an  
41 inductive thematic analysis of the focus group and individual interview material, which will be  
42 fed by answers to the open questions regarding potential (i) perceptions about the developed  
43 prediction models, (ii) social issues, (iii) legal issues, (iv) ethical and privacy issues, and (v)  
44 mitigation strategies for implementing such a system. Transcripts will be coded in order to  
45 demarcate segments within each of them. We will look for words or short phrases that  
46 demonstrate how the associated data segments inform our research objectives. Detailed  
47 results from the qualitative analysis of this material will be presented in a separate paper.

### 53 54 **Patient and Public Involvement**

1  
2  
3 Engagement with relevant stakeholders (e.g., policy/decision makers, and people with lived  
4 experience) through IKT is critical for developing equitable risk predictive algorithms and for  
5 maximizing the potential for future implementation. For this project, we have identified and  
6 engaged policy/decision makers from the Public Health Agency of Canada and from the INSPQ,  
7 as well as 8 people with lived experience. The representatives of INSPQ (EP, PL, VM, LR) were  
8 involved in study conceptualization and grant application. PL has been facilitating data  
9 extraction, participated in the bi-weekly team meetings. As described above, we have engaged  
10 people with lived experience through the qualitative interviews. The next round of qualitative  
11 interviews will be held after the prototype of the risk predictive models are developed to have a  
12 better understanding about privacy, ethics and implementation issues.  
13  
14  
15

### 16 **Ethics and dissemination**

17  
18  
19 This study will use routinely collected health administrative data. The analysis of secondary de-  
20 identified data at the INSPQ where the data are kept will not incur physical and psychological  
21 harms. The results of the study will be vetted by analysts at the INSPQ to ensure no privacy and  
22 confidentiality will be breached. The data used for this study will be kept at INSPQ for 15 years.  
23 The results will be presented in peer-reviewed journals, at academic conferences, and shared  
24 with knowledge users who were engaged from the beginning.  
25  
26

27  
28 Through this study, we aimed to develop risk prediction models to be used by policy and  
29 decision makers to forecast population risk of suicide at the provincial and health region levels,  
30 using routinely collected health administrative data and other publicly available area-level data.  
31 For example, policy and decision makers may use the models to project the proportion and  
32 number of suicide deaths in specific health regions/communities over the next 5 years, and  
33 decide how resources and community level interventions may be mobilized to the high risk  
34 regions/communities. Furthermore, the models can inform policy and decision makers about  
35 the potential impacts of these community level intervention on suicide prevention. The  
36 potential utility of such predictive tools has been attested by the active involvement by the  
37 policy and decision makers at the federal and provincial levels and people with lived  
38 experience. Nevertheless, predicting population risk of suicide is new and has not been well  
39 studied. There are a number of methodological and implementation challenges to be  
40 addressed.  
41  
42  
43

44  
45 Routinely collected health administrative data and population health survey data represent a  
46 unique opportunity for population health projection because it covers a majority of the general  
47 population in catchment areas, and the data can be readily accessed by policy and decision  
48 makers. Many risk predictive models have been developed for physical and mental health  
49 problems in the general population. For example, individual data from population health  
50 surveys and health administrative databases have been used to develop risk predictive models  
51 for diabetes,(31) heart disease,(32) and major depression.(33,34) These models may be used to  
52 identify high risk individuals in the community; they can also be used to forecast the population  
53 risk in the future. However, few models have integrated individual, healthcare system, and  
54 community level predictors in the same model. In this study, we proposed to include data from  
55  
56  
57

1  
2  
3 these different levels in model development, and convert the models into synthetic estimation  
4 models. There may be different approaches for integrating data from different levels for  
5 population risk prediction. Future studies are needed to explore the best method for data  
6 integration.  
7  
8

9  
10 The performance of a risk predictive model is commonly assessed by indicators of model  
11 discrimination and calibration.<sup>(35)</sup> Whereas model discrimination is critical for individual risk  
12 predictive models, policy and decision makers' focus is on the whole population rather than  
13 individuals. Therefore, model calibration plays a more important role in the performance of a  
14 population risk model. We proposed four indicators for assessing model performance.  
15 However, it is not clear how much error (the difference between predicted and observed risks)  
16 policy and decision makers may tolerate for population risk prediction, how they perceive the  
17 importance of model discrimination, whether other indicators exist for assessing population  
18 risk prediction models. We will explore these aspects through our qualitative study, and also  
19 encourage others to consider these in future studies. Similarly, we welcome discussions and  
20 debates about the methods for validating population risk predictive models. An individual risk  
21 predictive model is often developed using longitudinal cohort/closed population data and  
22 validated in a different but related cohort/closed population. This poses challenges for  
23 population risk predictive models because the population in a community/health region is open  
24 and dynamic. Appropriate methods for model validation and acceptability need to be  
25 developed and agreed by the research community and policy and decision makers.  
26  
27  
28  
29

30 This study relied on routinely collected health administrative data for model development and  
31 validation, rather than collecting primary data. Therefore, we have a little information about  
32 suicide behaviors among the individuals in the control group, which are strongly associated  
33 with suicide deaths. In the model development, we included hospitalization and emergency  
34 department visits due to suicide attempt, which may reduce the bias related to the lack of  
35 information about suicide behaviors. Nevertheless, this is a limitation of routinely collected  
36 health administrative data.  
37  
38  
39

40 Despite the challenges for developing population risk predictive model for suicide, research is  
41 urgently needed to address this important population health issue. This study represents one of  
42 the early steps in building such risk predictive models and methodology development, as part  
43 of the collective efforts for moving the field forward.  
44  
45  
46  
47  
48  
49  
50  
51  
52  
53  
54  
55  
56  
57  
58  
59  
60

**Authors' contribution:**

JLW drafted the manuscript. JLW, FGZK, J-FP, LR, EP, PL, GG, CG, and AL were involved in study design, conceptualization and funding application. JLW, FGZK, J-FP, LR, EP, PL, VM, CB-P, MM, GG, CG, and AL were involved in manuscript review, discussion, revision, and final approval.

**Funding statement:**

This study is supported by a New Frontiers for Research Funds grant (2019-00471) from Tri-Agency Institutional Programs Secretariat, Government of Canada, and by a Tier I Canada Research Chair award to JLW. The funders play no role in design and operation of this study.

**Competing interests:** none

## References

1. Statistics Canada. Deaths and age-specific mortality rates, by selected grouped causes [Internet]. 2019. Available from: <https://www150.statcan.gc.ca/t1/tbl1/en/tv.action?pid=1310039201>
2. World Health Organization. Suicide [Internet]. [cited 2022 May 15]. Available from: <https://www.who.int/news-room/fact-sheets/detail/suicide>
3. Mental Health Commission of Canada. RESEARCH ON SUICIDE AND ITS PREVENTION: What the current evidence reveals and topics for future research [Internet]. Ottawa, Canada; 2018. Available from: [www.mentalhealthcommission.ca](http://www.mentalhealthcommission.ca)
4. Tondo L, Albert MJ, Baldessarini RJ, Bini L. Suicide Rates in Relation to Health Care Access in the United States: An Ecological Study. Vol. 67, *J Clin Psychiatry*. 2006.
5. Lise Thibodeau, Elham Rahme, James Lachaud, Éric Pelletier, Louis Rochette, Ann John, Anne Reneflot KL, Lesage A. Individual, programmatic and systemic indicators of the quality of mental health care using a large health administrative database: an avenue for preventing suicide mortality. *Health Promotion and Chronic Disease Prevention in Canada*. 2018;38(7/8):295–304.
6. Mortier P, Cuijpers P, Kiekens G, Auerbach RP, Demyttenaere K, Green JG, et al. The prevalence of suicidal thoughts and behaviours among college students: A meta-analysis. Vol. 48, *Psychological Medicine*. 2018.
7. Nock MK, Borges G, Bromet EJ, Cha CB, Kessler RC, Lee S. Suicide and suicidal behavior. Vol. 30, *Epidemiologic Reviews*. 2008.
8. Goldman-Mellor SJ, Caspi A, Harrington HL, Hogan S, Nada-Raja S, Poulton R, et al. Suicide attempt in young people a signal for long-term health care and social needs. *JAMA Psychiatry*. 2014;71(2).
9. Crawford MJ, Nur U, McKenzie K, Tyrer P. Suicidal ideation and suicide attempts among ethnic minority groups in England: Results of a national household survey. *Psychol Med*. 2005;35(9).
10. Bernal M, Haro JM, Bernert S, Brugha T, de Graaf R, Bruffaerts R, et al. Risk factors for suicidality in Europe: Results from the ESEMED study. *J Affect Disord*. 2007;101(1–3).
11. Bolton JM, Gunnell D, Turecki G. Suicide risk assessment and intervention in people with mental illness. Vol. 351, *BMJ (Online)*. BMJ Publishing Group; 2015.
12. Gradus JL, Rosellini AJ, Horváth-Puhó E, Street AE, Galatzer-Levy I, Jiang T, et al. Prediction of Sex-Specific Suicide Risk Using Machine Learning and Single-Payer Health Care Registry Data from Denmark. *JAMA Psychiatry*. 2020;77(1).
13. Kessler RC, Warner LTCCH, Ivany LTCC, Petukhova M v, Rose S, Bromet EJ, et al. Predicting U.S. Army suicides after hospitalizations with psychiatric diagnoses in the Army Study to Assess Risk and Resilience Resilience in Service members ( Army STARRS ). *JAMA Psychiatry*. 2015;72(1):49–57.
14. Marks C, Abramovitz D, Donnelly CA, Carrasco-Escobar G, Carrasco-Hernández R, Ciccarone D, et al. Identifying counties at risk of high overdose mortality burden during

- 1  
2  
3 the emerging fentanyl epidemic in the USA: a predictive statistical modelling study.  
4 Lancet Public Health. 2021;6(10).
- 5  
6 15. Boland L, Kothari A, McCutcheon C, Graham ID. Building an integrated knowledge  
7 translation (IKT) evidence base: Colloquium proceedings and research direction. Vol. 18,  
8 Health Research Policy and Systems. 2020.
- 9  
10 16. Blais C, Jean S, Sirois C, Rochette L, Plante C, Larocque I, et al. Quebec integrated chronic  
11 disease surveillance system (QICDSS), an innovative approach. *Chronic Dis Inj Can.*  
12 2014;34(4).
- 13  
14 17. Thibodeau L, Rahme E, Lachaud J, Rochette L, John A, Reneflot A, et al. Individual ,  
15 programmatic and systemic indicators of the quality of mental health care using a large  
16 health administrative database : an avenue for preventing suicide mortality.  
17 2018;38(7):295–304.
- 18  
19 18. Vasiliadis HM, Lesage A, Latimer E, Seguin M. Implementing suicide prevention  
20 programs: Costs and potential life years saved in Canada. *Journal of Mental Health Policy  
21 and Economics.* 2015;18(3):147–55.
- 22  
23 19. Lesage A, Rochette L, Émond V, Pelletier É, St-Laurent D, Diallo FB, et al. A surveillance  
24 system to monitor excess mortality of people with mental illness in Canada. *Canadian  
25 Journal of Psychiatry.* 2015;60(12).
- 26  
27 20. Diallo FB, Pelletier É, Vasiliadis HM, Rochette L, Vincent A, Palardy S, et al. Morbidities  
28 and mortality of diagnosed attention deficit hyperactivity disorder (ADHD) over the  
29 youth lifespan: A population-based retrospective cohort study. *Int J Methods Psychiatr  
30 Res.* 2022;31(1).
- 31  
32 21. Lafrenière S, Gholi-Zadeh-Kharrat F, Sirois C, Massamba V, Rochette L, Brousseau-Paradis  
33 C, et al. The 5-year longitudinal diagnostic profile and health services utilization of  
34 patients treated with electroconvulsive therapy in Quebec: a population-based study.  
35 *Soc Psychiatry Psychiatr Epidemiol.* 2022 Sep 26;
- 36  
37 22. Huỳnh C, Kisely S, Rochette L, Pelletier É, Jutras-Aswad D, Larocque A, et al. Using  
38 administrative health data to estimate prevalence and mortality rates of alcohol and  
39 other substance-related disorders for surveillance purposes. *Drug Alcohol Rev.*  
40 2021;40(4).
- 41  
42 23. Cailhol L, Pelletier É, Rochette L, Laporte L, David P, Villeneuve É, et al. Prevalence,  
43 Mortality, and Health Care Use among Patients with Cluster B Personality Disorders  
44 Clinically Diagnosed in Quebec: A Provincial Cohort Study, 2001-2012. *Canadian Journal  
45 of Psychiatry.* 2017;62(5).
- 46  
47 24. Shatte ABR, Hutchinson DM, Teague SJ. Machine learning in mental health: A scoping  
48 review of methods and applications. Vol. 49, *Psychological Medicine.* 2019.
- 49  
50 25. McHugh CM, Large MM. Can machine-learning methods really help predict suicide? Vol.  
51 33, *Current opinion in psychiatry.* 2020.
- 52  
53 26. Bowen D, Ungar L. Generalized SHAP: Generating multiple types of explanations in  
54 machine learning. *ArXiv.* 2020 Jun 12;
- 55  
56 27. Sundararajan M, Najmi A. The many Shapley values for model explanation. *ArXiv.* 2019  
57 Aug 22;

- 1
- 2
- 3
- 4 28. Vrieze SI. Model selection and psychological theory: A discussion of the differences
- 5 between the Akaike information criterion (AIC) and the Bayesian information criterion
- 6 (BIC). *Psychol Methods*. 2012;17(2):228–243.
- 7 29. Karp I, Sylvestre MP, Abrahamowicz M, Leffondré K, Siemiatycki J. Bridging the etiologic
- 8 and prognostic outlooks in individualized assessment of absolute risk of an illness:
- 9 Application in lung cancer. *Eur J Epidemiol*. 2016 Nov 1;31(11):1091–9.
- 10 30. Rivas C, Tkacz D, Antao L, Mentzakis E, Gordon M, Anstee S, et al. Automated analysis of
- 11 free-text comments and dashboard representations in patient experience surveys: a
- 12 multimethod co-design study. *Health Services and Delivery Research*. 2019;7(23).
- 13 31. Rosella LC, Manuel DG, Burchill C, Stukel TA. A population-based risk algorithm for the
- 14 development of diabetes: Development and validation of the diabetes population risk
- 15 tool (DPoRT). *J Epidemiol Community Health (1978)*. 2011;65(7):613–20.
- 16 32. Manuel DG, Tuna M, Bennett C, Hennessy D, Rosella L, Sanmartin C, et al. Development
- 17 and validation of a cardiovascular disease risk-prediction model using population health
- 18 surveys: The Cardiovascular Disease Population Risk Tool (CVDPoRT). *CMAJ*.
- 19 2018;190(29):E871–82.
- 20 33. Wang J, Manuel D, Williams J, Schmitz N, Gilmour H, Patten S, et al. Development and
- 21 validation of prediction algorithms for major depressive episode in the general
- 22 population. *J Affect Disord*. 2013;151(1):39–45.
- 23 34. Wang J, Sareen J, Patten S, Bolton J, Schmitz N, Birney A. A prediction algorithm for first
- 24 onset of major depression in the general population: development and validation. *J*
- 25 *Epidemiol Community Health (1978)*. 2014 May;68(5):418–24.
- 26 35. Steyerberg EW. *Clinical Prediction Models. A Practical Approach to Development,*
- 27 *Validation, and Updating*. Springer; 2009.
- 28
- 29
- 30
- 31
- 32
- 33
- 34
- 35
- 36
- 37
- 38
- 39
- 40
- 41
- 42
- 43
- 44
- 45
- 46
- 47
- 48
- 49
- 50
- 51
- 52
- 53
- 54
- 55
- 56
- 57
- 58
- 59
- 60

1  
2  
3 Supplementary file #1:  
4

5  
6 Guiding questions for qualitative interviews.  
7

- 8 1) What are the currently policies and practices for suicide prevention that you know?  
9 2) What are the challenges you are facing in suicide prevention at population level?  
10 3) What are your views on using risk predictive tools for facilitating suicide prevention in  
11 the population? The advantages and drawbacks?  
12 4) what are your thoughts about using artificial intelligence and machine learning for  
13 suicide prevention? The potential pros and cons?  
14 5) From your view, how an ideal risk prediction tool should look like, that assists in your  
15 decision making?  
16 6) What visualization formats you have been using, and what are the limits of these  
17 visualization methods?  
18 7) What do you think of the visualization model presented to you?  
19  
20  
21  
22  
23  
24  
25  
26  
27  
28  
29  
30  
31  
32  
33  
34  
35  
36  
37  
38  
39  
40  
41  
42  
43  
44  
45  
46  
47  
48  
49  
50  
51  
52  
53  
54  
55  
56  
57  
58  
59  
60



## APPENDIX I\_1: CANDIDATE PREDICTORS

### i. PSYCHIATRIC DISORDERS DIAGNOSIS<sup>1</sup>

- Substance use disorder<sup>2</sup>
  - o Alcohol use disorder
  - o drug use disorder
- Mood disorder
  - Major depressive disorder
  - Bipolar disorder
- Anxiety disorder
- Schizophrenia
- Personality disorders
- ADHD
- Other diagnosis

| derived variables <sup>34</sup> | variable name       |
|---------------------------------|---------------------|
| Substance use disorder          | psydx_subuse_3      |
| Substance use disorder          | psydx_subuse_6      |
| Substance use disorder          | psydx_subuse_12     |
| Substance use disorder          | psydx_subuse_24     |
| Substance use disorder          | psydx_subuse_36     |
| Substance use disorder          | psydx_subuse_48     |
| Substance use disorder          | psydx_subuse_60     |
| Alcohol use disorder            | Psydx_alcoholuse_3  |
| Alcohol use disorder            | Psydx_alcoholuse_6  |
| Alcohol use disorder            | Psydx_alcoholuse_12 |
| Alcohol use disorder            | Psydx_alcoholuse_24 |
| Alcohol use disorder            | Psydx_alcoholuse_36 |
| Alcohol use disorder            | Psydx_alcoholuse_48 |
| Alcohol use disorder            | Psydx_alcoholuse_60 |
| Drug use disorder               | Psydx_druguse_3     |
| Drug use disorder               | Psydx_druguse_6     |
| Drug use disorder               | Psydx_druguse_12    |
| Drug use disorder               | Psydx_druguse_24    |
| Drug use disorder               | Psydx_druguse_36    |
| Drug use disorder               | Psydx_druguse_48    |
| Drug use disorder               | Psydx_druguse_60    |

The candidate predictors were captured using timeframes of prior 3, 6, 12, 24, 36, 48, and/or 60 months, indicated by the last digits of the variable name. For instance, "psydx\_subuse\_3" and "psydx\_subuse\_6" refer to a diagnosis of substance use disorder in the prior 3 and 6 months, respectively

|    |                           |                  |
|----|---------------------------|------------------|
| 1  |                           |                  |
| 2  |                           |                  |
| 3  | mood disorder             | Psydx_mood_3     |
| 4  | mood disorder             | Psydx_mood_6     |
| 5  | mood disorder             | Psydx_mood_12    |
| 6  | mood disorder             | Psydx_mood_24    |
| 7  | mood disorder             | Psydx_mood_36    |
| 8  | mood disorder             | Psydx_mood_48    |
| 9  | mood disorder             | Psydx_mood_60    |
| 10 | mood disorder             | Psydx_mood_60    |
| 11 | Anxiety disorder          | psydx_anx_3      |
| 12 | Anxiety disorder          | psydx_anx_6      |
| 13 | Anxiety disorder          | psydx_anx_12     |
| 14 | Anxiety disorder          | psydx_anx_24     |
| 15 | Anxiety disorder          | psydx_anx_36     |
| 16 | Anxiety disorder          | psydx_anx_48     |
| 17 | Anxiety disorder          | psydx_anx_60     |
| 18 | Anxiety disorder          | psydx_anx_60     |
| 19 | Major Depressive Disorder | Psydx_dep_3      |
| 20 | Major Depressive Disorder | Psydx_dep_6      |
| 21 | Major Depressive Disorder | Psydx_dep_12     |
| 22 | Major Depressive Disorder | Psydx_dep_24     |
| 23 | Major Depressive Disorder | Psydx_dep_36     |
| 24 | Major Depressive Disorder | Psydx_dep_48     |
| 25 | Major Depressive Disorder | Psydx_dep_60     |
| 26 | Major Depressive Disorder | Psydx_dep_60     |
| 27 | Bipolar disorder          | Psydx_bipolar_3  |
| 28 | Bipolar disorder          | Psydx_bipolar_6  |
| 29 | Bipolar disorder          | Psydx_bipolar_12 |
| 30 | Bipolar disorder          | Psydx_bipolar_24 |
| 31 | Bipolar disorder          | Psydx_bipolar_36 |
| 32 | Bipolar disorder          | Psydx_bipolar_48 |
| 33 | Bipolar disorder          | Psydx_bipolar_60 |
| 34 | Schizophrenia             | psydx_scz_3      |
| 35 | Schizophrenia             | psydx_scz_6      |
| 36 | Schizophrenia             | psydx_scz_12     |
| 37 | Schizophrenia             | psydx_scz_24     |
| 38 | Schizophrenia             | psydx_scz_36     |
| 39 | Schizophrenia             | psydx_scz_48     |
| 40 | Schizophrenia             | psydx_scz_60     |
| 41 | Personality disorder      | psydx_pd_3       |
| 42 | Personality disorder      | psydx_pd_6       |
| 43 | Personality disorder      | psydx_pd_12      |
| 44 | Personality disorder      | psydx_pd_24      |
| 45 | Personality disorder      | psydx_pd_36      |
| 46 | Personality disorder      | psydx_pd_48      |
| 47 | Personality disorder      | psydx_pd_48      |
| 48 |                           |                  |
| 49 |                           |                  |
| 50 |                           |                  |
| 51 |                           |                  |
| 52 |                           |                  |
| 53 |                           |                  |
| 54 |                           |                  |
| 55 |                           |                  |
| 56 |                           |                  |
| 57 |                           |                  |
| 58 |                           |                  |
| 59 |                           |                  |
| 60 |                           |                  |

|                      |               |
|----------------------|---------------|
| Personality disorder | psydx_pd_60   |
| ADHD                 | psydx_adhd_3  |
| ADHD                 | psydx_adhd_6  |
| ADHD                 | psydx_adhd_12 |
| ADHD                 | psydx_adhd_24 |
| ADHD                 | psydx_adhd_36 |
| ADHD                 | psydx_adhd_48 |
| ADHD                 | psydx_adhd_60 |
| Other diagnosis      | psydx_otr_3   |
| Other diagnosis      | psydx_otr_6   |
| Other diagnosis      | psydx_otr_12  |
| Other diagnosis      | psydx_otr_24  |
| Other diagnosis      | psydx_otr_36  |
| Other diagnosis      | psydx_otr_48  |
| Other diagnosis      | psydx_otr_60  |

## ii. PHARMACOLOGICAL TREATMENTS FOR MENTAL HEALTH DISORDERS

- Typical antipsychotics
- Atypical antipsychotics
- Clozapine
- Antidepressant for anxiety or depression
- Antidepressants for other reasons
- Mood stabilizer
- Anxiolytic
- ADHD medication

| <b>derived variables<sup>5</sup></b> | <b>variable name</b>     |
|--------------------------------------|--------------------------|
| Typical antipsychotics               | rx_psy_antipsych_typ_3   |
| Typical antipsychotics               | rx_psy_antipsych_typ_6   |
| Typical antipsychotics               | rx_psy_antipsych_typ_12  |
| Typical antipsychotics               | rx_psy_antipsych_typ_24  |
| Typical antipsychotics               | rx_psy_antipsych_typ_36  |
| Typical antipsychotics               | rx_psy_antipsych_typ_48  |
| Typical antipsychotics               | rx_psy_antipsych_typ_60  |
| Atypical antipsychotics              | rx_psy_antipsych_atyp_3  |
| Atypical antipsychotics              | rx_psy_antipsych_atyp_6  |
| Atypical antipsychotics              | rx_psy_antipsych_atyp_12 |
| Atypical antipsychotics              | rx_psy_antipsych_atyp_24 |
| Atypical antipsychotics              | rx_psy_antipsych_atyp_36 |
| Atypical antipsychotics              | rx_psy_antipsych_atyp_48 |

|                                          |                          |
|------------------------------------------|--------------------------|
| Atypical antipsychotics                  | rx_psy_antipsych_atyp_60 |
| Clozapine                                | rx_psy_clozapine_3       |
| Clozapine                                | rx_psy_clozapine_6       |
| Clozapine                                | rx_psy_clozapine_12      |
| Clozapine                                | rx_psy_clozapine_24      |
| Clozapine                                | rx_psy_clozapine_36      |
| Clozapine                                | rx_psy_clozapine_48      |
| Clozapine                                | rx_psy_clozapine_60      |
| antidepressant for anxiety or depression | rx_psy_antidep_anxdep_3  |
| antidepressant for anxiety or depression | rx_psy_antidep_anxdep_6  |
| antidepressant for anxiety or depression | rx_psy_antidep_anxdep_12 |
| antidepressant for anxiety or depression | rx_psy_antidep_anxdep_24 |
| antidepressant for anxiety or depression | rx_psy_antidep_anxdep_36 |
| antidepressant for anxiety or depression | rx_psy_antidep_anxdep_48 |
| antidepressant for anxiety or depression | rx_psy_antidep_anxdep_60 |
| antidepressant for other reasons         | rx_psy_antidep_otr_3     |
| Antidepressant for other reasons         | rx_psy_antidep_otr_6     |
| Antidepressant for other reasons         | rx_psy_antidep_otr_12    |
| Antidepressant for other reasons         | rx_psy_antidep_otr_24    |
| Antidepressant for other reasons         | rx_psy_antidep_otr_36    |
| Antidepressant for other reasons         | rx_psy_antidep_otr_48    |
| Antidepressant for other reasons         | rx_psy_antidep_otr_60    |
| mood stabilizer                          | rx_psy_mdestb_3          |
| mood stabilizer                          | rx_psy_mdestb_6          |
| mood stabilizer                          | rx_psy_mdestb_12         |
| mood stabilizer                          | rx_psy_mdestb_24         |
| mood stabilizer                          | rx_psy_mdestb_36         |
| mood stabilizer                          | rx_psy_mdestb_48         |
| mood stabilizer                          | rx_psy_mdestb_60         |
| anxiolytics                              | rx_psy_anx_3             |
| anxiolytics                              | rx_psy_anx_6             |
| anxiolytics                              | rx_psy_anx_12            |
| anxiolytics                              | rx_psy_anx_24            |
| anxiolytics                              | rx_psy_anx_36            |
| anxiolytics                              | rx_psy_anx_48            |
| anxiolytics                              | rx_psy_anx_60            |
| ADHD medication                          | rx_psy_adhd_3            |
| ADHD medication                          | rx_psy_adhd_6            |
| ADHD medication                          | rx_psy_adhd_12           |
| ADHD medication                          | rx_psy_adhd_24           |
| ADHD medication                          | rx_psy_adhd_36           |

|                 |                |
|-----------------|----------------|
| ADHD medication | rx_psy_adhd_48 |
| ADHD medication | rx_psy_adhd_60 |

### iii. NON-PHARMACOLOGICAL TREATMENTS FOR MENTAL HEALTH DISORDERS

- duration of hospitalisations for mental health reasons (continuous, sum of days)
- number of hospitalisations for mental health reasons (continuous)
- duration of hospitalisations for suicide attempt (continuous, sum of days)
- number of hospitalisations for suicide attempt (continuous)
- Number of care center visits for mental health reasons (continuous)
- number of general practitioner visits for mental health reasons (continuous)
- number of emergency room visits for mental health reasons (continuous)
- number of outpatient psychiatrist visits (continuous)
- number of other specialist visits for mental health reasons (continuous)
- number of psychotherapy visits with a psychiatrist (continuous)
- number of psychotherapy visits with a general practitioner (continuous)
- number of psychotherapy visits with another specialist (continuous)
- Number of outpatient paediatrician visits (continuous)
- No mental health services
- number of ECT treatments received (continuous)
- Acute ECT received (dichotomous)
- Maintenance ECT received (dichotomous)

| derived variables                                      | variable name            |
|--------------------------------------------------------|--------------------------|
| Duration of hospit for suicide attempt (conti, # days) | duration_hosp_suicide_3  |
| duration of hospit for suicide attempt (conti, # days) | duration_hosp_suicide_6  |
| duration of hospit for suicide attempt (conti, # days) | duration_hosp_suicide_12 |
| duration of hospit for suicide attempt (conti, # days) | duration_hosp_suicide_24 |
| duration of hospit for suicide attempt (conti, # days) | duration_hosp_suicide_36 |
| duration of hospit for suicide attempt (conti, # days) | duration_hosp_suicide_48 |
| duration of hospit for suicide attempt (conti, # days) | duration_hosp_suicide_60 |
| # of hospit for suicide attempt (continuous)           | #_hosp_suicide_3         |
| # of hospit for suicide attempt (continuous)           | #_hosp_suicide_6         |
| # of hospit for suicide attempt (continuous)           | #_hosp_suicide_12        |
| # of hospit for suicide attempt (continuous)           | #_hosp_suicide_24        |
| # of hospit for suicide attempt (continuous)           | #_hosp_suicide_36        |
| # of hospit for suicide attempt (continuous)           | #_hosp_suicide_48        |
| # of hospit for suicide attempt (continuous)           | #_hosp_suicide_60        |
| Duration of hospit for mh reasons (conti, # of days)   | Duration_hosp_mh_3       |
| Duration of hospit for mh reasons (conti, # of days)   | Duration_hosp_mh_6       |
| Duration of hospit for mh reasons (conti, # of days)   | Duration_hosp_mh_12      |
| Duration of hospit for mh reasons (conti, # of days)   | Duration_hosp_mh_24      |
| Duration of hospit for mh reasons (conti, # of days)   | Duration_hosp_mh_36      |
| Duration of hospit for mh reasons (conti, # of days)   | Duration_hosp_mh_48      |
| Duration of hospit for mh reasons (conti, # of days)   | Duration_hosp_mh_60      |

|    |                                                              |                         |
|----|--------------------------------------------------------------|-------------------------|
| 1  |                                                              |                         |
| 2  |                                                              |                         |
| 3  |                                                              |                         |
| 4  | # of hospit for mh reasons (continuous)                      | #_hosp_mh_3             |
| 5  | # of hospit for mh reasons (continuous)                      | #_hosp_mh_6             |
| 6  | # of hospit for mh reasons (continuous)                      | #_hosp_mh_12            |
| 7  | # of hospit for mh reasons (continuous)                      | #_hosp_mh_24            |
| 8  | # of hospit for mh reasons (continuous)                      | #_hosp_mh_36            |
| 9  | # of hospit for mh reasons (continuous)                      | #_hosp_mh_48            |
| 10 | # of hospit for mh reasons (continuous)                      | #_hosp_mh_60            |
| 11 | # of hospit for mh reasons (continuous)                      | #_hosp_mh_60            |
| 12 | # of outpatient paediatrician visits (continuous)            | #_outpat_pediatician_3  |
| 13 | # of outpatient paediatrician visits (continuous)            | #_outpat_pediatician_6  |
| 14 | # of outpatient paediatrician visits (continuous)            | #_outpat_pediatician_12 |
| 15 | # of outpatient paediatrician visits (continuous)            | #_outpat_pediatician_24 |
| 16 | # of outpatient paediatrician visits (continuous)            | #_outpat_pediatician_36 |
| 17 | # of outpatient paediatrician visits (continuous)            | #_outpat_pediatician_48 |
| 18 | # of outpatient paediatrician visits (continuous)            | #_outpat_pediatician_60 |
| 19 | # of outpatient paediatrician visits (continuous)            | #_outpat_pediatician_60 |
| 20 | Number of Care center for mental health reasons (continuous) | #_Carectr_mh_3          |
| 21 | Number of Care center for mental health reasons (continuous) | #_Carectr_mh_6          |
| 22 | Number of Care center for mental health reasons (continuous) | #_Carectr_mh_12         |
| 23 | Number of Care center for mental health reasons (continuous) | #_Carectr_mh_24         |
| 24 | Number of Care center for mental health reasons (continuous) | #_Carectr_mh_36         |
| 25 | Number of Care center for mental health reasons (continuous) | #_Carectr_mh_48         |
| 26 | Number of Care center for mental health reasons (continuous) | #_Carectr_mh_60         |
| 27 | Number of Care center for mental health reasons (continuous) | #_Carectr_mh_60         |
| 28 | # of emergency visits for mh reasons (continuous)            | #_ER_mh_3               |
| 29 | # of emergency visits for mh reasons (continuous)            | #_ER_mh_6               |
| 30 | # of emergency visits for mh reasons (continuous)            | #_ER_mh_12              |
| 31 | # of emergency visits for mh reasons (continuous)            | #_ER_mh_24              |
| 32 | # of emergency visits for mh reasons (continuous)            | #_ER_mh_36              |
| 33 | # of emergency visits for mh reasons (continuous)            | #_ER_mh_48              |
| 34 | # of emergency visits for mh reasons (continuous)            | #_ER_mh_60              |
| 35 | # of emergency visits for mh reasons (continuous)            | #_ER_mh_60              |
| 36 | # of GP visits for mh reasons (continuous)                   | #_gp_mh_3               |
| 37 | # of GP visits for mh reasons (continuous)                   | #_gp_mh_6               |
| 38 | # of GP visits for mh reasons (continuous)                   | #_gp_mh_12              |
| 39 | # of GP visits for mh reasons (continuous)                   | #_gp_mh_24              |
| 40 | # of GP visits for mh reasons (continuous)                   | #_gp_mh_36              |
| 41 | # of GP visits for mh reasons (continuous)                   | #_gp_mh_48              |
| 42 | # of GP visits for mh reasons (continuous)                   | #_gp_mh_60              |
| 43 | # of GP visits for mh reasons (continuous)                   | #_gp_mh_60              |
| 44 | # of outpatient psychiatrist visits (continuous)             | #_psy_mh_3              |
| 45 | # of outpatient psychiatrist visits (continuous)             | #_psy_mh_6              |
| 46 | # of outpatient psychiatrist visits (continuous)             | #_psy_mh_12             |
| 47 | # of outpatient psychiatrist visits (continuous)             | #_psy_mh_24             |
| 48 | # of outpatient psychiatrist visits (continuous)             | #_psy_mh_36             |
| 49 | # of outpatient psychiatrist visits (continuous)             | #_psy_mh_48             |
| 50 | # of outpatient psychiatrist visits (continuous)             | #_psy_mh_48             |
| 51 |                                                              |                         |
| 52 |                                                              |                         |
| 53 |                                                              |                         |
| 54 |                                                              |                         |
| 55 |                                                              |                         |
| 56 |                                                              |                         |
| 57 |                                                              |                         |
| 58 |                                                              |                         |
| 59 |                                                              |                         |
| 60 |                                                              |                         |

|    |                                                         |                     |
|----|---------------------------------------------------------|---------------------|
| 1  |                                                         |                     |
| 2  |                                                         |                     |
| 3  | # of outpatient psychiatrist visits (continuous)        | #_psy_mh_60         |
| 4  | # of psychotherapy visits with a psychiatrist (conti)   | #_psychotx_psy_3    |
| 5  | # of psychotherapy visits with a psychiatrist (conti)   | #_psychotx_psy_6    |
| 6  | # of psychotherapy visits with a psychiatrist (conti)   | #_psychotx_psy_12   |
| 7  | # of psychotherapy visits with a psychiatrist (conti)   | #_psychotx_psy_24   |
| 8  | # of psychotherapy visits with a psychiatrist (conti)   | #_psychotx_psy_36   |
| 9  | # of psychotherapy visits with a psychiatrist (conti)   | #_psychotx_psy_48   |
| 10 | # of psychotherapy visits with a psychiatrist (conti)   | #_psychotx_psy_60   |
| 11 | # of other specialist visits for mh reasons (conti)     | #_spc_mh_3          |
| 12 | # of other specialist visits for mh reasons (conti)     | #_spc_mh_6          |
| 13 | # of other specialist visits for mh reasons (conti)     | #_spc_mh_12         |
| 14 | # of other specialist visits for mh reasons (conti)     | #_spc_mh_24         |
| 15 | # of other specialist visits for mh reasons (conti)     | #_spc_mh_36         |
| 16 | # of other specialist visits for mh reasons (conti)     | #_spc_mh_48         |
| 17 | # of other specialist visits for mh reasons (conti)     | #_spc_mh_60         |
| 18 | # of psychotherapy visits with a GP (conti)             | #_psychotx_gp_3     |
| 19 | # of psychotherapy visits with a GP (conti)             | #_psychotx_gp_6     |
| 20 | # of psychotherapy visits with a GP (conti)             | #_psychotx_gp_12    |
| 21 | # of psychotherapy visits with a GP (conti)             | #_psychotx_gp_24    |
| 22 | # of psychotherapy visits with a GP (conti)             | #_psychotx_gp_36    |
| 23 | # of psychotherapy visits with a GP (conti)             | #_psychotx_gp_48    |
| 24 | # of psychotherapy visits with a GP (conti)             | #_psychotx_gp_60    |
| 25 | # of psychotherapy visits with other specialist (conti) | #_psychotx_other_3  |
| 26 | # of psychotherapy visits with other specialist (conti) | #_psychotx_other_6  |
| 27 | # of psychotherapy visits with other specialist (conti) | #_psychotx_other_12 |
| 28 | # of psychotherapy visits with other specialist (conti) | #_psychotx_other_24 |
| 29 | # of psychotherapy visits with other specialist (conti) | #_psychotx_other_36 |
| 30 | # of psychotherapy visits with other specialist (conti) | #_psychotx_other_48 |
| 31 | # of psychotherapy visits with other specialist (conti) | #_psychotx_other_60 |
| 32 | No mental health services                               | No_mh_services_3    |
| 33 | No mental health services                               | No_mh_services_6    |
| 34 | No mental health services                               | No_mh_services_12   |
| 35 | No mental health services                               | No_mh_services_24   |
| 36 | No mental health services                               | No_mh_services_36   |
| 37 | No mental health services                               | No_mh_services_48   |
| 38 | No mental health services                               | No_mh_services_60   |
| 39 | number of ECT received (continuous)                     | ECT_#_3             |
| 40 | number of ECT received (continuous)                     | ECT_#_6             |
| 41 | number of ECT received (continuous)                     | ECT_#_12            |
| 42 | number of ECT received (continuous)                     | ECT_#_24            |
| 43 | number of ECT received (continuous)                     | ECT_#_36            |
| 44 |                                                         |                     |
| 45 |                                                         |                     |
| 46 |                                                         |                     |
| 47 |                                                         |                     |
| 48 |                                                         |                     |
| 49 |                                                         |                     |
| 50 |                                                         |                     |
| 51 |                                                         |                     |
| 52 |                                                         |                     |
| 53 |                                                         |                     |
| 54 |                                                         |                     |
| 55 |                                                         |                     |
| 56 |                                                         |                     |
| 57 |                                                         |                     |
| 58 |                                                         |                     |
| 59 |                                                         |                     |
| 60 |                                                         |                     |

|                                     |                    |
|-------------------------------------|--------------------|
| number of ECT received (continuous) | ECT_#_48           |
| number of ECT received (continuous) | ECT_#_60           |
| acute ECT (dichotomous)             | ECT_acute_3        |
| acute ECT (dichotomous)             | ECT_acute_6        |
| acute ECT (dichotomous)             | ECT_acute_12       |
| acute ECT (dichotomous)             | ECT_acute_24       |
| acute ECT (dichotomous)             | ECT_acute_36       |
| acute ECT (dichotomous)             | ECT_acute_48       |
| acute ECT (dichotomous)             | ECT_acute_60       |
| Maintenance ECT (dichotomous)       | ECT_maintenance_3  |
| Maintenance ECT (dichotomous)       | ECT_maintenance_6  |
| Maintenance ECT (dichotomous)       | ECT_maintenance_12 |
| Maintenance ECT (dichotomous)       | ECT_maintenance_24 |
| Maintenance ECT (dichotomous)       | ECT_maintenance_36 |
| Maintenance ECT (dichotomous)       | ECT_maintenance_48 |
| Maintenance ECT (dichotomous)       | ECT_maintenance_60 |

#### iv. PHYSICAL DIAGNOSIS

- Dementia
- Neurological disease
- Endocrine system disorder
- Trauma
- Respiratory disorder
- Infectious disease
- Digestive disorder
- Cardiovascular disorder
- Cancer
- Other physical disorder
- Charlson/elixhauser index with psy (continuous)<sup>6</sup>
- Charlson/elixhauser index without psy (continuous)

| <b>derived variables</b> | <b>variable name</b> |
|--------------------------|----------------------|
| dementia                 | physdx_dem_3         |
| dementia                 | physdx_dem_6         |
| dementia                 | physdx_dem_12        |
| dementia                 | physdx_dem_24        |
| dementia                 | physdx_dem_36        |
| dementia                 | physdx_dem_48        |
| dementia                 | physdx_dem_60        |
| neurological disease     | physdx_neuro_3       |
| neurological disease     | physdx_neuro_6       |



|    |                           |                  |
|----|---------------------------|------------------|
| 1  |                           |                  |
| 2  |                           |                  |
| 3  | neurological disease      | physdx_neuro_12  |
| 4  | neurological disease      | physdx_neuro_24  |
| 5  | neurological disease      | physdx_neuro_36  |
| 6  | neurological disease      | physdx_neuro_48  |
| 7  | neurological disease      | physdx_neuro_60  |
| 8  | neurological disease      | physdx_neuro_60  |
| 9  | endocrine system disorder | physdx_endo_3    |
| 10 | endocrine system disorder | physdx_endo_6    |
| 11 | endocrine system disorder | physdx_endo_12   |
| 12 | endocrine system disorder | physdx_endo_24   |
| 13 | endocrine system disorder | physdx_endo_36   |
| 14 | endocrine system disorder | physdx_endo_48   |
| 15 | endocrine system disorder | physdx_endo_60   |
| 16 | endocrine system disorder | physdx_endo_60   |
| 17 | trauma                    | physdx_trauma_3  |
| 18 | trauma                    | physdx_trauma_6  |
| 19 | trauma                    | physdx_trauma_12 |
| 20 | trauma                    | physdx_trauma_24 |
| 21 | trauma                    | physdx_trauma_36 |
| 22 | trauma                    | physdx_trauma_48 |
| 23 | trauma                    | physdx_trauma_60 |
| 24 | trauma                    | physdx_trauma_60 |
| 25 | respiratory disorder      | physdx_resp_3    |
| 26 | respiratory disorder      | physdx_resp_6    |
| 27 | respiratory disorder      | physdx_resp_12   |
| 28 | respiratory disorder      | physdx_resp_24   |
| 29 | respiratory disorder      | physdx_resp_36   |
| 30 | respiratory disorder      | physdx_resp_48   |
| 31 | respiratory disorder      | physdx_resp_60   |
| 32 | respiratory disorder      | physdx_resp_60   |
| 33 | infectious disease        | physdx_infec_3   |
| 34 | infectious disease        | physdx_infec_6   |
| 35 | infectious disease        | physdx_infec_12  |
| 36 | infectious disease        | physdx_infec_24  |
| 37 | infectious disease        | physdx_infec_36  |
| 38 | infectious disease        | physdx_infec_48  |
| 39 | infectious disease        | physdx_infec_60  |
| 40 | infectious disease        | physdx_infec_60  |
| 41 | digestive disorder        | physdx_diges_3   |
| 42 | digestive disorder        | physdx_diges_6   |
| 43 | digestive disorder        | physdx_diges_12  |
| 44 | digestive disorder        | physdx_diges_24  |
| 45 | digestive disorder        | physdx_diges_36  |
| 46 | digestive disorder        | physdx_diges_48  |
| 47 | digestive disorder        | physdx_diges_60  |
| 48 | digestive disorder        | physdx_diges_60  |
| 49 | cardiovascular disorder   | physdx_cvd_3     |
| 50 |                           |                  |
| 51 |                           |                  |
| 52 |                           |                  |
| 53 |                           |                  |
| 54 |                           |                  |
| 55 |                           |                  |
| 56 |                           |                  |
| 57 |                           |                  |
| 58 |                           |                  |
| 59 |                           |                  |
| 60 |                           |                  |

|    |                                               |                                  |
|----|-----------------------------------------------|----------------------------------|
| 1  |                                               |                                  |
| 2  |                                               |                                  |
| 3  | cardiovascular disorder                       | physdx_cvd_6                     |
| 4  | cardiovascular disorder                       | physdx_cvd_12                    |
| 5  | cardiovascular disorder                       | physdx_cvd_24                    |
| 6  | cardiovascular disorder                       | physdx_cvd_36                    |
| 7  | cardiovascular disorder                       | physdx_cvd_48                    |
| 8  | cardiovascular disorder                       | physdx_cvd_60                    |
| 9  | cardiovascular disorder                       | physdx_cvd_60                    |
| 10 | cardiovascular disorder                       | physdx_cvd_60                    |
| 11 | cancer                                        | physdx_cncr_3                    |
| 12 | cancer                                        | physdx_cncr_6                    |
| 13 | cancer                                        | physdx_cncr_12                   |
| 14 | cancer                                        | physdx_cncr_24                   |
| 15 | cancer                                        | physdx_cncr_24                   |
| 16 | cancer                                        | physdx_cncr_36                   |
| 17 | cancer                                        | physdx_cncr_48                   |
| 18 | cancer                                        | physdx_cncr_48                   |
| 19 | cancer                                        | physdx_cncr_60                   |
| 20 | other physical disorders                      | physdx_otr_3                     |
| 21 | other physical disorders                      | physdx_otr_6                     |
| 22 | other physical disorders                      | physdx_otr_12                    |
| 23 | other physical disorders                      | physdx_otr_12                    |
| 24 | other physical disorders                      | physdx_otr_24                    |
| 25 | other physical disorders                      | physdx_otr_36                    |
| 26 | other physical disorders                      | physdx_otr_36                    |
| 27 | other physical disorders                      | physdx_otr_48                    |
| 28 | other physical disorders                      | physdx_otr_48                    |
| 29 | other physical disorders                      | physdx_otr_60                    |
| 30 | charlson/elixhauser index with psy (conti)    | physdx_comorbidity_withpsy_3     |
| 31 | charlson/elixhauser index with psy (conti)    | physdx_comorbidity_withpsy_3     |
| 32 | charlson/elixhauser index with psy (conti)    | physdx_comorbid_withpsy_6        |
| 33 | charlson/elixhauser index with psy (conti)    | physdx_comorbidity_withpsy_12    |
| 34 | charlson/elixhauser index with psy (conti)    | physdx_comorbidity_withpsy_12    |
| 35 | charlson/elixhauser index with psy (conti)    | physdx_comorbidity_withpsy_24    |
| 36 | charlson/elixhauser index with psy (conti)    | physdx_comorbidity_withpsy_24    |
| 37 | charlson/elixhauser index with psy (conti)    | physdx_comorbidity_withpsy_36    |
| 38 | charlson/elixhauser index with psy (conti)    | physdx_comorbidity_withpsy_36    |
| 39 | charlson/elixhauser index with psy (conti)    | physdx_comorbidity_withpsy_48    |
| 40 | charlson/elixhauser index with psy (conti)    | physdx_comorbidity_withpsy_48    |
| 41 | charlson/elixhauser index with psy (conti)    | physdx_comorbidity_withpsy_60    |
| 42 | charlson/elixhauser index with psy (conti)    | physdx_comorbidity_withpsy_60    |
| 43 | charlson/elixhauser index without psy (conti) | physdx_comorbidity_withoutpsy_3  |
| 44 | charlson/elixhauser index without psy (conti) | physdx_comorbidity_withoutpsy_3  |
| 45 | charlson/elixhauser index without psy (conti) | physdx_comorbid_withoutpsy_6     |
| 46 | charlson/elixhauser index without psy (conti) | physdx_comorbid_withoutpsy_6     |
| 47 | charlson/elixhauser index without psy (conti) | physdx_comorbidity_withoutpsy_12 |
| 48 | charlson/elixhauser index without psy (conti) | physdx_comorbidity_withoutpsy_12 |
| 49 | charlson/elixhauser index without psy (conti) | physdx_comorbidity_withoutpsy_24 |
| 50 | charlson/elixhauser index without psy (conti) | physdx_comorbidity_withoutpsy_24 |
| 51 | charlson/elixhauser index without psy (conti) | physdx_comorbidity_withoutpsy_36 |
| 52 | charlson/elixhauser index without psy (conti) | physdx_comorbidity_withoutpsy_36 |
| 53 | charlson/elixhauser index without psy (conti) | physdx_comorbidity_withoutpsy_36 |
| 54 | charlson/elixhauser index without psy (conti) | physdx_comorbidity_withoutpsy_36 |
| 55 |                                               |                                  |
| 56 |                                               |                                  |
| 57 |                                               |                                  |
| 58 |                                               |                                  |
| 59 |                                               |                                  |
| 60 |                                               |                                  |

|                                               |                                  |
|-----------------------------------------------|----------------------------------|
| charlson/elixhauser index without psy (conti) | physdx_comorbidity_withoutpsy_48 |
| charlson/elixhauser index without psy (conti) | physdx_comorbidity_withoutpsy_60 |

#### V. PHARMACOLOGICAL TREATMENTS FOR PHYSICAL HEALTH DISORDERS

- Medication for diabetes
- Medication for cardiovascular disease
- Medication for respiratory diseases
- Medication for gastro-intestinal disorder
- Anti-infective agent
- Pain medication
- Contraceptive
- Other medication

| derived variables                         | variable name       |
|-------------------------------------------|---------------------|
| medication for diabetes                   | rx_phys_diabetes_3  |
| medication for diabetes                   | rx_phys_diabetes_6  |
| medication for diabetes                   | rx_phys_diabetes_12 |
| medication for diabetes                   | rx_phys_diabetes_24 |
| medication for diabetes                   | rx_phys_diabetes_36 |
| medication for diabetes                   | rx_phys_diabetes_48 |
| medication for diabetes                   | rx_phys_diabetes_60 |
| medication for cardiovascular disease     | rx_phys_cvd_3       |
| medication for cardiovascular disease     | rx_phys_cvd_6       |
| medication for cardiovascular disease     | rx_phys_cvd_12      |
| medication for cardiovascular disease     | rx_phys_cvd_24      |
| medication for cardiovascular disease     | rx_phys_cvd_36      |
| medication for cardiovascular disease     | rx_phys_cvd_48      |
| medication for cardiovascular disease     | rx_phys_cvd_60      |
| medication for respiratory disease        | rx_phys_resp_3      |
| medication for respiratory disease        | rx_phys_resp_6      |
| medication for respiratory disease        | rx_phys_resp_12     |
| medication for respiratory disease        | rx_phys_resp_24     |
| medication for respiratory disease        | rx_phys_resp_36     |
| medication for respiratory disease        | rx_phys_resp_48     |
| medication for respiratory disease        | rx_phys_resp_60     |
| medication for gastro-intestinal disorder | rx_phys_gi_3        |
| medication for gastro-intestinal disorder | rx_phys_gi_6        |
| medication for gastro-intestinal disorder | rx_phys_gi_12       |
| medication for gastro-intestinal disorder | rx_phys_gi_24       |
| medication for gastro-intestinal disorder | rx_phys_gi_36       |
| medication for gastro-intestinal disorder | rx_phys_gi_48       |

|                                           |                      |
|-------------------------------------------|----------------------|
| medication for gastro-intestinal disorder | rx_phys_gi_60        |
| anti-infective agents                     | rx_phys_antiinfec_3  |
| anti-infective agents                     | rx_phys_antiinfec_6  |
| anti-infective agents                     | rx_phys_antiinfec_12 |
| anti-infective agents                     | rx_phys_antiinfec_24 |
| anti-infective agents                     | rx_phys_antiinfec_36 |
| anti-infective agents                     | rx_phys_antiinfec_48 |
| anti-infective agents                     | rx_phys_antiinfec_60 |
| pain medication                           | rx_phys_pain_3       |
| pain medication                           | rx_phys_pain_6       |
| pain medication                           | rx_phys_pain_12      |
| pain medication                           | rx_phys_pain_24      |
| pain medication                           | rx_phys_pain_36      |
| pain medication                           | rx_phys_pain_48      |
| pain medication                           | rx_phys_pain_60      |
| contraceptives                            | rx_phys_contracep_3  |
| contraceptives                            | rx_phys_contracep_6  |
| contraceptives                            | rx_phys_contracep_12 |
| contraceptives                            | rx_phys_contracep_24 |
| contraceptives                            | rx_phys_contracep_36 |
| contraceptives                            | rx_phys_contracep_48 |
| contraceptives                            | rx_phys_contracep_60 |
| other medication                          | rx_phys_otr_3        |
| other medication                          | rx_phys_otr_6        |
| other medication                          | rx_phys_otr_12       |
| other medication                          | rx_phys_otr_24       |
| other medication                          | rx_phys_otr_36       |
| other medication                          | rx_phys_otr_48       |
| other medication                          | rx_phys_otr_60       |

vi. NON-PHARMACOLOGICAL TREATMENTS FOR PHYSICAL HEALTH DISORDERS

- duration of hospitalisations for physical health reasons (continuous, sum of days)
- number of hospitalisations for physical health reasons (continuous)
- care center visits/plays for physical health reasons\*
- number of general practitioner visits for physical reasons (continuous)\*
- number of emergency room visits for physical reasons (continuous)\*
- number of outpatient specialist visits for physical health reasons (continuous)\*
- number of outpatient paediatrician visits (continuous)\*

| derived variables                                      | variable name         |
|--------------------------------------------------------|-----------------------|
| Duration of hospit for phys reasons (conti, # of days) | Duration_hosp_phys_3  |
| Duration of hospit for phys reasons (conti, # of days) | Duration_hosp_phys_6  |
| Duration of hospit for phys reasons (conti, # of days) | Duration_hosp_phys_12 |

|                                                          |                       |
|----------------------------------------------------------|-----------------------|
| Duration of hospit for phys reasons (conti, # of days)   | Duration_hosp_phys_24 |
| Duration of hospit for phys reasons (conti, # of days)   | Duration_hosp_phys_36 |
| Duration of hospit for phys reasons (conti, # of days)   | Duration_hosp_phys_48 |
| Duration of hospit for phys reasons (conti, # of days)   | Duration_hosp_phys_60 |
| # of hospit for phys reasons (continuous)                | #_hosp_phys_3         |
| # of hospit for phys reasons (continuous)                | #_hosp_phys_6         |
| # of hospit for phys reasons (continuous)                | #_hosp_phys_12        |
| # of hospit for phys reasons (continuous)                | #_hosp_phys_24        |
| # of hospit for phys reasons (continuous)                | #_hosp_phys_36        |
| # of hospit for phys reasons (continuous)                | #_hosp_phys_48        |
| # of hospit for phys reasons (continuous)                | #_hosp_phys_60        |
| Care center for physical health reasons                  | Carectr_phys_3        |
| Care center for physical health reasons                  | Carectr_phys_6        |
| Care center for physical health reasons                  | Carectr_phys_12       |
| Care center for physical health reasons                  | Carectr_phys_24       |
| Care center for physical health reasons                  | Carectr_phys_36       |
| Care center for physical health reasons                  | Carectr_phys_48       |
| Care center for physical health reasons                  | Carectr_phys_60       |
| # of outpatient specialist visit for phys reasons (cont) | #_spc_phys_3          |
| # of outpatient specialist visit for phys reasons (cont) | #_spc_phys_6          |
| # of outpatient specialist visit for phys reasons (cont) | #_spc_phys_12         |
| # of outpatient specialist visit for phys reasons (cont) | #_spc_phys_24         |
| # of outpatient specialist visit for phys reasons (cont) | #_spc_phys_36         |
| # of outpatient specialist visit for phys reasons (cont) | #_spc_phys_48         |
| # of outpatient specialist visit for phys reasons (cont) | #_spc_phys_60         |
| # of GP visits for phys reasons (continuous)             | #_gp_phys_3           |
| # of GP visits for phys reasons (continuous)             | #_gp_phys_6           |
| # of GP visits for phys reasons (continuous)             | #_gp_phys_12          |
| # of GP visits for phys reasons (continuous)             | #_gp_phys_24          |
| # of GP visits for phys reasons (continuous)             | #_gp_phys_36          |
| # of GP visits for phys reasons (continuous)             | #_gp_phys_48          |
| # of GP visits for phys reasons (continuous)             | #_gp_phys_60          |
| # of emergency visits for phys reasons (continuous)      | #_ER_phys_3           |
| # of emergency visits for phys reasons (continuous)      | #_ER_phys_6           |
| # of emergency visits for phys reasons (continuous)      | #_ER_phys_12          |
| # of emergency visits for phys reasons (continuous)      | #_ER_phys_24          |
| # of emergency visits for phys reasons (continuous)      | #_ER_phys_36          |
| # of emergency visits for phys reasons (continuous)      | #_ER_phys_48          |
| # of emergency visits for phys reasons (continuous)      | #_ER_phys_60          |

#### vii. INDIVIDUAL SOCIO-DEMOGRAPHIC VARIABLES

- Age (continuous)
- age group: 15-24
- age group: 25-34
- age group: 35-44
- age group: 45-54

- age group: 55-64
- age group: 65-74
- age group: 75-84
- age group: ≥85
- Sex
- Location – rural
- Location – non-rural
- Location – missing data
- rss 01 bas saint-laurent
- rss 02 saguenay-lac-saint-jean
- rss 03 capitale-nationale
- rss 04 mauricie et centre-du-québec
- rss 05 estrie
- rss 06 montréal
- rss 07 outaouais
- rss 08 abitibi-témiscamingue
- rss 09 côte-nord
- rss 10 nord-du-québec
- rss 11gaspésie-îles-de-la-madeleine
- rss 12 chaudière-appalaches
- rss 13 laval
- rss 14 lanaudière
- rss 15 laurentides
- rss 16 montérégie
- Adherence to the public drug plan (RAMQ) (dichotomous)

| derived variables        | variable name  |
|--------------------------|----------------|
| Age (continuous)         | Age_continuous |
| age group: 15-24         | age_15-24      |
| age group: 25-34         | age_25-34      |
| age group: 35-44         | age_35-44      |
| age group: 45-54         | age_45-54      |
| age group: 55-64         | age_55-64      |
| age group: 65-74         | age_65-74      |
| age group: 75-84         | age_75-84      |
| age group: ≥85           | age_85+        |
| sex male                 | sex_m          |
| sex female               | sex_f          |
| rss 01 bas-saint-laurent | loc_rss_01_3   |
| rss 01 bas-saint-laurent | loc_rss_01_6   |
| rss 01 bas-saint-laurent | loc_rss_01_12  |
| rss 01 bas-saint-laurent | loc_rss_01_24  |
| rss 01 bas-saint-laurent | loc_rss_01_36  |

|    |                                     |               |
|----|-------------------------------------|---------------|
| 1  |                                     |               |
| 2  |                                     |               |
| 3  | rss 01 bas-saint-laurent            | loc_rss_01_48 |
| 4  | rss 01 bas-saint-laurent            | loc_rss_01_60 |
| 5  |                                     |               |
| 6  | rss 02 saguenay-lac-saint-jean      | loc_rss_02_3  |
| 7  | rss 02 saguenay-lac-saint-jean      | loc_rss_02_6  |
| 8  | rss 02 saguenay-lac-saint-jean      | loc_rss_02_12 |
| 9  |                                     |               |
| 10 | rss 02 saguenay-lac-saint-jean      | loc_rss_02_24 |
| 11 | rss 02 saguenay-lac-saint-jean      | loc_rss_02_36 |
| 12 | rss 02 saguenay-lac-saint-jean      | loc_rss_02_48 |
| 13 | rss 02 saguenay-lac-saint-jean      | loc_rss_02_60 |
| 14 |                                     |               |
| 15 | rss 03 capitale-nationale           | loc_rss_03_3  |
| 16 | rss 03 capitale-nationale           | loc_rss_03_6  |
| 17 | rss 03 capitale-nationale           | loc_rss_03_12 |
| 18 | rss 03 capitale-nationale           | loc_rss_03_24 |
| 19 |                                     |               |
| 20 | rss 03 capitale-nationale           | loc_rss_03_36 |
| 21 | rss 03 capitale-nationale           | loc_rss_03_48 |
| 22 | rss 03 capitale-nationale           | loc_rss_03_60 |
| 23 |                                     |               |
| 24 | rss 04 mauricie et centre-du-québec | loc_rss_04_3  |
| 25 | rss 04 mauricie et centre-du-québec | loc_rss_04_6  |
| 26 | rss 04 mauricie et centre-du-québec | loc_rss_04_12 |
| 27 | rss 04 mauricie et centre-du-québec | loc_rss_04_24 |
| 28 | rss 04 mauricie et centre-du-québec | loc_rss_04_36 |
| 29 | rss 04 mauricie et centre-du-québec | loc_rss_04_48 |
| 30 | rss 04 mauricie et centre-du-québec | loc_rss_04_60 |
| 31 |                                     |               |
| 32 | rss 05 estrie                       | loc_rss_05_3  |
| 33 | rss 05 estrie                       | loc_rss_05_6  |
| 34 | rss 05 estrie                       | loc_rss_05_12 |
| 35 | rss 05 estrie                       | loc_rss_05_24 |
| 36 | rss 05 estrie                       | loc_rss_05_36 |
| 37 | rss 05 estrie                       | loc_rss_05_48 |
| 38 | rss 05 estrie                       | loc_rss_05_60 |
| 39 |                                     |               |
| 40 | rss 06 montréal                     | loc_rss_06_3  |
| 41 | rss 06 montréal                     | loc_rss_06_6  |
| 42 | rss 06 montréal                     | loc_rss_06_12 |
| 43 | rss 06 montréal                     | loc_rss_06_24 |
| 44 | rss 06 montréal                     | loc_rss_06_36 |
| 45 | rss 06 montréal                     | loc_rss_06_48 |
| 46 | rss 06 montréal                     | loc_rss_06_60 |
| 47 |                                     |               |
| 48 | rss 07 outaouais                    | loc_rss_07_3  |
| 49 | rss 07 outaouais                    | loc_rss_07_6  |
| 50 | rss 07 outaouais                    | loc_rss_07_12 |
| 51 | rss 07 outaouais                    | loc_rss_07_24 |
| 52 |                                     |               |
| 53 |                                     |               |
| 54 |                                     |               |
| 55 |                                     |               |
| 56 |                                     |               |
| 57 |                                     |               |
| 58 |                                     |               |
| 59 |                                     |               |
| 60 |                                     |               |

|    |                                      |               |
|----|--------------------------------------|---------------|
| 1  |                                      |               |
| 2  |                                      |               |
| 3  |                                      |               |
| 4  | rss 07 outaouais                     | loc_rss_07_36 |
| 5  | rss 07 outaouais                     | loc_rss_07_48 |
| 6  | rss 07 outaouais                     | loc_rss_07_60 |
| 7  | 08 abitibi-témiscamingue             | loc_rss_08_3  |
| 8  | rss 08 abitibi-témiscamingue         | loc_rss_08_6  |
| 9  | rss 08 abitibi-témiscamingue         | loc_rss_08_12 |
| 10 | rss 08 abitibi-témiscamingue         | loc_rss_08_24 |
| 11 | rss 08 abitibi-témiscamingue         | loc_rss_08_36 |
| 12 | 08 abitibi-témiscamingue             | loc_rss_08_48 |
| 13 | rss 08 abitibi-témiscamingue         | loc_rss_08_60 |
| 14 | rss 08 abitibi-témiscamingue         | loc_rss_08_60 |
| 15 | rss 09 côte-nord                     | loc_rss_09_3  |
| 16 | rss 09 côte-nord                     | loc_rss_09_6  |
| 17 | rss 09 côte-nord                     | loc_rss_09_12 |
| 18 | rss 09 côte-nord                     | loc_rss_09_24 |
| 19 | rss 09 côte-nord                     | loc_rss_09_36 |
| 20 | rss 09 côte-nord                     | loc_rss_09_48 |
| 21 | rss 09 côte-nord                     | loc_rss_09_60 |
| 22 | rss 10 nord-du-québec                | loc_rss_10_3  |
| 23 | rss 10 nord-du-québec                | loc_rss_10_6  |
| 24 | rss 10 nord-du-québec                | loc_rss_10_12 |
| 25 | rss 10 nord-du-québec                | loc_rss_10_24 |
| 26 | rss 10 nord-du-québec                | loc_rss_10_36 |
| 27 | rss 10 nord-du-québec                | loc_rss_10_48 |
| 28 | rss 10 nord-du-québec                | loc_rss_10_60 |
| 29 | rss 11 gaspésie-îles-de-la-madeleine | loc_rss_11_3  |
| 30 | rss 11 gaspésie-îles-de-la-madeleine | loc_rss_11_6  |
| 31 | rss 11 gaspésie-îles-de-la-madeleine | loc_rss_11_12 |
| 32 | rss 11 gaspésie-îles-de-la-madeleine | loc_rss_11_24 |
| 33 | rss 11 gaspésie-îles-de-la-madeleine | loc_rss_11_36 |
| 34 | rss 11 gaspésie-îles-de-la-madeleine | loc_rss_11_48 |
| 35 | rss 11 gaspésie-îles-de-la-madeleine | loc_rss_11_60 |
| 36 | rss 12 chaudière-appalaches          | loc_rss_12_3  |
| 37 | rss 12 chaudière-appalaches          | loc_rss_12_6  |
| 38 | rss 12 chaudière-appalaches          | loc_rss_12_12 |
| 39 | rss 12 chaudière-appalaches          | loc_rss_12_24 |
| 40 | rss 12 chaudière-appalaches          | loc_rss_12_36 |
| 41 | rss 12 chaudière-appalaches          | loc_rss_12_48 |
| 42 | rss 12 chaudière-appalaches          | loc_rss_12_60 |
| 43 | rss 13 laval                         | loc_rss_13_3  |
| 44 | rss 13 laval                         | loc_rss_13_6  |
| 45 | rss 13 laval                         | loc_rss_13_12 |
| 46 |                                      |               |
| 47 |                                      |               |
| 48 |                                      |               |
| 49 |                                      |               |
| 50 |                                      |               |
| 51 |                                      |               |
| 52 |                                      |               |
| 53 |                                      |               |
| 54 |                                      |               |
| 55 |                                      |               |
| 56 |                                      |               |
| 57 |                                      |               |
| 58 |                                      |               |
| 59 |                                      |               |
| 60 |                                      |               |



|    |                       |               |
|----|-----------------------|---------------|
| 1  |                       |               |
| 2  |                       |               |
| 3  | rss 13 laval          | loc_rss_13_24 |
| 4  | rss 13 laval          | loc_rss_13_36 |
| 5  | rss 13 laval          | loc_rss_13_48 |
| 6  | rss 13 laval          | loc_rss_13_60 |
| 7  | rss 14 lanaudière     | loc_rss_14_3  |
| 8  | rss 14 lanaudière     | loc_rss_14_6  |
| 9  | rss 14 lanaudière     | loc_rss_14_12 |
| 10 | rss 14 lanaudière     | loc_rss_14_24 |
| 11 | rss 14 lanaudière     | loc_rss_14_36 |
| 12 | rss 14 lanaudière     | loc_rss_14_48 |
| 13 | rss 14 lanaudière     | loc_rss_14_60 |
| 14 | rss 15 laurentides    | loc_rss_15_3  |
| 15 | rss 15 laurentides    | loc_rss_15_6  |
| 16 | rss 15 laurentides    | loc_rss_15_12 |
| 17 | rss 15 laurentides    | loc_rss_15_24 |
| 18 | rss 15 laurentides    | loc_rss_15_36 |
| 19 | rss 15 laurentides    | loc_rss_15_48 |
| 20 | rss 15 laurentides    | loc_rss_15_60 |
| 21 | rss 16 montérégie     | loc_rss_16_3  |
| 22 | rss 16 montérégie     | loc_rss_16_6  |
| 23 | rss 16 montérégie     | loc_rss_16_12 |
| 24 | rss 16 montérégie     | loc_rss_16_24 |
| 25 | rss 16 montérégie     | loc_rss_16_36 |
| 26 | rss 16 montérégie     | loc_rss_16_48 |
| 27 | rss 16 montérégie     | loc_rss_16_60 |
| 28 | location nonrural     | nonrural_3    |
| 29 | location nonrural     | nonrural_6    |
| 30 | location nonrural     | nonrural_12   |
| 31 | location nonrural     | nonrural_24   |
| 32 | location nonrural     | nonrural_36   |
| 33 | location nonrural     | nonrural_48   |
| 34 | location nonrural     | nonrural_60   |
| 35 | location rural        | rural_3       |
| 36 | location rural        | rural_6       |
| 37 | location rural        | rural_12      |
| 38 | location rural        | rural_24      |
| 39 | location rural        | rural_36      |
| 40 | location rural        | rural_48      |
| 41 | location rural        | rural_60      |
| 42 | location missing data | loc_missing_3 |
| 43 | location missing data | loc_missing_6 |
| 44 |                       |               |
| 45 |                       |               |
| 46 |                       |               |
| 47 |                       |               |
| 48 |                       |               |
| 49 |                       |               |
| 50 |                       |               |
| 51 |                       |               |
| 52 |                       |               |
| 53 |                       |               |
| 54 |                       |               |
| 55 |                       |               |
| 56 |                       |               |
| 57 |                       |               |
| 58 |                       |               |
| 59 |                       |               |
| 60 |                       |               |

|                                          |                 |
|------------------------------------------|-----------------|
| location missing data                    | loc_missing_12  |
| location missing data                    | loc_missing_24  |
| location missing data                    | loc_missing_36  |
| location missing data                    | loc_missing_48  |
| location missing data                    | loc_missing_60  |
| adherence to the public drug plan (RAMQ) | PublicRxPlan_3  |
| adherence to the public drug plan (RAMQ) | PublicRxPlan_6  |
| adherence to the public drug plan (RAMQ) | PublicRxPlan_12 |
| adherence to the public drug plan (RAMQ) | PublicRxPlan_24 |
| adherence to the public drug plan (RAMQ) | PublicRxPlan_36 |
| adherence to the public drug plan (RAMQ) | PublicRxPlan_48 |
| adherence to the public drug plan (RAMQ) | PublicRxPlan_60 |

## ENVIRONMENTAL VARIABLES

### i. DEPRIVATION INDEX

- Material deprivation (from 1, least deprived to 5, most deprived)
- Social deprivation (from 1, least deprived to 5, most deprived)

| <b>derived variables<sup>7</sup></b> | <b>variable name</b> |
|--------------------------------------|----------------------|
| material deprivation (1-5)           | matdep_3             |
| material deprivation (1-5)           | matdep_6             |
| material deprivation (1-5)           | matdep_12            |
| material deprivation (1-5)           | matdep_24            |
| material deprivation (1-5)           | matdep_36            |
| material deprivation (1-5)           | matdep_48            |
| material deprivation (1-5)           | matdep_60            |
| social deprivation (1-5)             | socdep_3             |
| social deprivation (1-5)             | socdep_6             |
| social deprivation (1-5)             | socdep_12            |
| social deprivation (1-5)             | socdep_24            |
| social deprivation (1-5)             | socdep_36            |
| social deprivation (1-5)             | socdep_48            |
| social deprivation (1-5)             | socdep_60            |

## SYSTEM VARIABLES

### i. HEALTH SYSTEM ENVIRONMENT (HEALTH SYSTEM)

- Mental health budget

1  
2  
3  
4  
5  
6  
7  
8  
9  
10  
11  
12  
13  
14  
15  
16  
17  
18  
19  
20  
21  
22  
23  
24  
25  
26  
27  
28  
29  
30  
31  
32  
33  
34  
35  
36  
37  
38  
39  
40  
41  
42  
43  
44  
45  
46  
47  
48  
49  
50  
51  
52  
53  
54  
55  
56  
57  
58  
59  
60

- Bas-Saint-Laurent
- Saguenay-Lac-Saint-Jean
- Capitale-Nationale
- Mauricie et Centre-du-Québec
- Estrie
- Montréal
- Outaouais
- Abitibi-Témiscamingue
- Côte-Nord
- Nord-du-Québec
- Gaspésie-îles-de-la-Madeleine
- Chaudière-Appalaches
- Laval
- Lanaudière
- Laurentides
- Montérégie
- Addictions budget
  - Bas-Saint-Laurent
  - Saguenay-Lac-Saint-Jean
  - Capitale-Nationale
  - Mauricie et Centre-du-Québec
  - Estrie
  - Montréal
  - Outaouais
  - Abitibi-Témiscamingue
  - Côte-Nord
  - Nord-du-Québec
  - Gaspésie-îles-de-la-Madeleine
  - Chaudière-Appalaches
  - Laval
  - Lanaudière
  - Laurentides
  - Montérégie
- regional mental health budget (\$/capita)
  - 2018-2019
  - 2017-2018
  - 2016-2017
  - 2015-2016
- regional addictions health budget (\$/capita)
  - 2018-2019
  - 2017-2018
  - 2016-2017
  - 2015-2016

| derived variables                             | variable name |
|-----------------------------------------------|---------------|
| rss 01 bas-saint-laurent mental health budget | rss_01_mh_3   |
| rss 01 bas-saint-laurent mental health budget | rss_01_mh_6   |
| rss 01 bas-saint-laurent mental health budget | rss_01_mh_12  |

|    |                                                          |              |
|----|----------------------------------------------------------|--------------|
| 1  |                                                          |              |
| 2  |                                                          |              |
| 3  |                                                          |              |
| 4  | rss 01 bas-saint-laurent mental health budget            | rss_01_mh_24 |
| 5  | rss 01 bas-saint-laurent mental health budget            | rss_01_mh_36 |
| 6  | rss 01 bas-saint-laurent mental health budget            | rss_01_mh_48 |
| 7  | rss 01 bas-saint-laurent mental health budget            | rss_01_mh_60 |
| 8  |                                                          |              |
| 9  | rss 02 saguenay-lac-saint-jean mental health budget      | rss_02_mh_3  |
| 10 | rss 02 saguenay-lac-saint-jean mental health budget      | rss_02_mh_6  |
| 11 | rss 02 saguenay-lac-saint-jean mental health budget      | rss_02_mh_12 |
| 12 | rss 02 saguenay-lac-saint-jean mental health budget      | rss_02_mh_24 |
| 13 | rss 02 saguenay-lac-saint-jean mental health budget      | rss_02_mh_36 |
| 14 | rss 02 saguenay-lac-saint-jean mental health budget      | rss_02_mh_48 |
| 15 | rss 02 saguenay-lac-saint-jean mental health budget      | rss_02_mh_60 |
| 16 |                                                          |              |
| 17 | rss 03 capitale-nationale mental health budget           | rss_03_mh_3  |
| 18 | rss 03 capitale-nationale mental health budget           | rss_03_mh_6  |
| 19 | rss 03 capitale-nationale mental health budget           | rss_03_mh_12 |
| 20 | rss 03 capitale-nationale mental health budget           | rss_03_mh_14 |
| 21 | rss 03 capitale-nationale mental health budget           | rss_03_mh_36 |
| 22 | rss 03 capitale-nationale mental health budget           | rss_03_mh_48 |
| 23 | rss 03 capitale-nationale mental health budget           | rss_03_mh_60 |
| 24 |                                                          |              |
| 25 | rss 04 mauricie et centre-du-québec mental health budget | rss_04_mh_3  |
| 26 | rss 04 mauricie et centre-du-québec mental health budget | rss_04_mh_6  |
| 27 | rss 04 mauricie et centre-du-québec mental health budget | rss_04_mh_12 |
| 28 | rss 04 mauricie et centre-du-québec mental health budget | rss_04_mh_24 |
| 29 | rss 04 mauricie et centre-du-québec mental health budget | rss_04_mh_36 |
| 30 | rss 04 mauricie et centre-du-québec mental health budget | rss_04_mh_48 |
| 31 | rss 04 mauricie et centre-du-québec mental health budget | rss_04_mh_60 |
| 32 |                                                          |              |
| 33 | rss 05 estrie mental health budget                       | rss_05_mh_3  |
| 34 | rss 05 estrie mental health budget                       | rss_05_mh_6  |
| 35 | rss 05 estrie mental health budget                       | rss_05_mh_12 |
| 36 | rss 05 estrie mental health budget                       | rss_05_mh_24 |
| 37 | rss 05 estrie mental health budget                       | rss_05_mh_36 |
| 38 | rss 05 estrie mental health budget                       | rss_05_mh_48 |
| 39 | rss 05 estrie mental health budget                       | rss_05_mh_60 |
| 40 |                                                          |              |
| 41 | rss 06 montréal mental health budget                     | rss_06_mh_3  |
| 42 | rss 06 montréal mental health budget                     | rss_06_mh_6  |
| 43 | rss 06 montréal mental health budget                     | rss_06_mh_12 |
| 44 | rss 06 montréal mental health budget                     | rss_06_mh_24 |
| 45 | rss 06 montréal mental health budget                     | rss_06_mh_36 |
| 46 | rss 06 montréal mental health budget                     | rss_06_mh_48 |
| 47 | rss 06 montréal mental health budget                     | rss_06_mh_60 |
| 48 |                                                          |              |
| 49 | rss 07 outaouais mental health budget                    | rss_07_mh_3  |
| 50 | rss 07 outaouais mental health budget                    | rss_07_mh_6  |
| 51 |                                                          |              |
| 52 |                                                          |              |
| 53 |                                                          |              |
| 54 |                                                          |              |
| 55 |                                                          |              |
| 56 |                                                          |              |
| 57 |                                                          |              |
| 58 |                                                          |              |
| 59 |                                                          |              |
| 60 |                                                          |              |

|    |                                                           |              |
|----|-----------------------------------------------------------|--------------|
| 1  |                                                           |              |
| 2  |                                                           |              |
| 3  | rss 07 outaouais mental health budget                     | rss_07_mh_12 |
| 4  | rss 07 outaouais mental health budget                     | rss_07_mh_24 |
| 5  | rss 07 outaouais mental health budget                     | rss_07_mh_36 |
| 6  | rss 07 outaouais mental health budget                     | rss_07_mh_48 |
| 7  | rss 07 outaouais mental health budget                     | rss_07_mh_60 |
| 8  | rss 07 outaouais mental health budget                     | rss_07_mh_60 |
| 9  | rss 07 outaouais mental health budget                     | rss_07_mh_60 |
| 10 | rss 08 abitibi-témiscamingue mental health budget         | rss_08_mh_3  |
| 11 | rss 08 abitibi-témiscamingue mental health budget         | rss_08_mh_6  |
| 12 | rss 08 abitibi-témiscamingue mental health budget         | rss_08_mh_12 |
| 13 | rss 08 abitibi-témiscamingue mental health budget         | rss_08_mh_24 |
| 14 | rss 08 abitibi-témiscamingue mental health budget         | rss_08_mh_24 |
| 15 | rss 08 abitibi-témiscamingue mental health budget         | rss_08_mh_36 |
| 16 | rss 08 abitibi-témiscamingue mental health budget         | rss_08_mh_48 |
| 17 | rss 08 abitibi-témiscamingue mental health budget         | rss_08_mh_48 |
| 18 | rss 08 abitibi-témiscamingue mental health budget         | rss_08_mh_60 |
| 19 | rss 08 abitibi-témiscamingue mental health budget         | rss_08_mh_60 |
| 20 | rss 09 côte-nord mental health budget                     | rss_09_mh_3  |
| 21 | rss 09 côte-nord mental health budget                     | rss_09_mh_6  |
| 22 | rss 09 côte-nord mental health budget                     | rss_09_mh_12 |
| 23 | rss 09 côte-nord mental health budget                     | rss_09_mh_24 |
| 24 | rss 09 côte-nord mental health budget                     | rss_09_mh_24 |
| 25 | rss 09 côte-nord mental health budget                     | rss_09_mh_36 |
| 26 | rss 09 côte-nord mental health budget                     | rss_09_mh_48 |
| 27 | rss 09 côte-nord mental health budget                     | rss_09_mh_48 |
| 28 | rss 09 côte-nord mental health budget                     | rss_09_mh_60 |
| 29 | rss 09 côte-nord mental health budget                     | rss_09_mh_60 |
| 30 | rss 10 nord-du-québec mental health budget                | rss_10_mh_3  |
| 31 | rss 10 nord-du-québec mental health budget                | rss_10_mh_6  |
| 32 | rss 10 nord-du-québec mental health budget                | rss_10_mh_12 |
| 33 | rss 10 nord-du-québec mental health budget                | rss_10_mh_24 |
| 34 | rss 10 nord-du-québec mental health budget                | rss_10_mh_24 |
| 35 | rss 10 nord-du-québec mental health budget                | rss_10_mh_36 |
| 36 | rss 10 nord-du-québec mental health budget                | rss_10_mh_48 |
| 37 | rss 10 nord-du-québec mental health budget                | rss_10_mh_48 |
| 38 | rss 10 nord-du-québec mental health budget                | rss_10_mh_60 |
| 39 | rss 10 nord-du-québec mental health budget                | rss_10_mh_60 |
| 40 | rss 11 gaspésie-îles-de-la-madeleine mental health budget | rss_11_mh_3  |
| 41 | rss 11 gaspésie-îles-de-la-madeleine mental health budget | rss_11_mh_6  |
| 42 | rss 11 gaspésie-îles-de-la-madeleine mental health budget | rss_11_mh_12 |
| 43 | rss 11 gaspésie-îles-de-la-madeleine mental health budget | rss_11_mh_24 |
| 44 | rss 11 gaspésie-îles-de-la-madeleine mental health budget | rss_11_mh_24 |
| 45 | rss 11 gaspésie-îles-de-la-madeleine mental health budget | rss_11_mh_36 |
| 46 | rss 11 gaspésie-îles-de-la-madeleine mental health budget | rss_11_mh_48 |
| 47 | rss 11 gaspésie-îles-de-la-madeleine mental health budget | rss_11_mh_48 |
| 48 | rss 11 gaspésie-îles-de-la-madeleine mental health budget | rss_11_mh_60 |
| 49 | rss 11 gaspésie-îles-de-la-madeleine mental health budget | rss_11_mh_60 |
| 50 | rss 12 chaudière-appalaches mental health budget          | rss_12_mh_3  |
| 51 | rss 12 chaudière-appalaches mental health budget          | rss_12_mh_6  |
| 52 | rss 12 chaudière-appalaches mental health budget          | rss_12_mh_12 |
| 53 | rss 12 chaudière-appalaches mental health budget          | rss_12_mh_24 |
| 54 | rss 12 chaudière-appalaches mental health budget          | rss_12_mh_24 |
| 55 | rss 12 chaudière-appalaches mental health budget          | rss_12_mh_36 |
| 56 | rss 12 chaudière-appalaches mental health budget          | rss_12_mh_48 |
| 57 | rss 12 chaudière-appalaches mental health budget          | rss_12_mh_48 |
| 58 | rss 12 chaudière-appalaches mental health budget          | rss_12_mh_60 |
| 59 | rss 12 chaudière-appalaches mental health budget          | rss_12_mh_60 |
| 60 | rss 13 laval mental health budget                         | rss_13_mh_3  |

|    |                                                  |              |
|----|--------------------------------------------------|--------------|
| 1  |                                                  |              |
| 2  |                                                  |              |
| 3  |                                                  |              |
| 4  | rss 13 laval mental health budget                | rss_13_mh_6  |
| 5  | rss 13 laval mental health budget                | rss_13_mh_12 |
| 6  | rss 13 laval mental health budget                | rss_13_mh_24 |
| 7  | rss 13 laval mental health budget                | rss_13_mh_36 |
| 8  | rss 13 laval mental health budget                | rss_13_mh_48 |
| 9  |                                                  |              |
| 10 | rss 13 laval mental health budget                | rss_13_mh_60 |
| 11 | rss 14 lanaudière mental health budget           | rss_14_mh_3  |
| 12 | rss 14 lanaudière mental health budget           | rss_14_mh_6  |
| 13 | rss 14 lanaudière mental health budget           | rss_14_mh_12 |
| 14 | rss 14 lanaudière mental health budget           | rss_14_mh_24 |
| 15 | rss 14 lanaudière mental health budget           | rss_14_mh_36 |
| 16 | rss 14 lanaudière mental health budget           | rss_14_mh_48 |
| 17 | rss 14 lanaudière mental health budget           | rss_14_mh_60 |
| 18 |                                                  |              |
| 19 | rss 15 laurentides mental health budget          | rss_15_mh_3  |
| 20 | rss 15 laurentides mental health budget          | rss_15_mh_6  |
| 21 | rss 15 laurentides mental health budget          | rss_15_mh_12 |
| 22 | rss 15 laurentides mental health budget          | rss_15_mh_24 |
| 23 | rss 15 laurentides mental health budget          | rss_15_mh_36 |
| 24 | rss 15 laurentides mental health budget          | rss_15_mh_48 |
| 25 | rss 15 laurentides mental health budget          | rss_15_mh_60 |
| 26 |                                                  |              |
| 27 | rss 16 montérégie mental health budget           | rss_16_mh_3  |
| 28 | rss 16 montérégie mental health budget           | rss_16_mh_6  |
| 29 | rss 16 montérégie mental health budget           | rss_16_mh_12 |
| 30 | rss 16 montérégie mental health budget           | rss_16_mh_24 |
| 31 | rss 16 montérégie mental health budget           | rss_16_mh_36 |
| 32 | rss 16 montérégie mental health budget           | rss_16_mh_48 |
| 33 | rss 16 montérégie mental health budget           | rss_16_mh_60 |
| 34 |                                                  |              |
| 35 | rss 01 bas-saint-laurent addictions budget       | rss_01_a_3   |
| 36 | rss 01 bas-saint-laurent addictions budget       | rss_01_a_6   |
| 37 | rss 01 bas-saint-laurent addictions budget       | rss_01_a_12  |
| 38 | rss 01 bas-saint-laurent addictions budget       | rss_01_a_24  |
| 39 | rss 01 bas-saint-laurent addictions budget       | rss_01_a_36  |
| 40 | rss 01 bas-saint-laurent addictions budget       | rss_01_a_48  |
| 41 | rss 01 bas-saint-laurent addictions budget       | rss_01_a_60  |
| 42 |                                                  |              |
| 43 | rss 02 saguenay-lac-saint-jean addictions budget | rss_02_a_3   |
| 44 | rss 02 saguenay-lac-saint-jean addictions budget | rss_02_a_6   |
| 45 | rss 02 saguenay-lac-saint-jean addictions budget | rss_02_a_12  |
| 46 | rss 02 saguenay-lac-saint-jean addictions budget | rss_02_a_24  |
| 47 | rss 02 saguenay-lac-saint-jean addictions budget | rss_02_a_36  |
| 48 | rss 02 saguenay-lac-saint-jean addictions budget | rss_02_a_48  |
| 49 | rss 02 saguenay-lac-saint-jean addictions budget | rss_02_a_60  |
| 50 |                                                  |              |
| 51 |                                                  |              |
| 52 |                                                  |              |
| 53 |                                                  |              |
| 54 |                                                  |              |
| 55 |                                                  |              |
| 56 |                                                  |              |
| 57 |                                                  |              |
| 58 |                                                  |              |
| 59 |                                                  |              |
| 60 |                                                  |              |

|    |                                                       |             |
|----|-------------------------------------------------------|-------------|
| 1  |                                                       |             |
| 2  |                                                       |             |
| 3  |                                                       |             |
| 4  | rss 03 capitale-nationale addictions budget           | rss_03_a_3  |
| 5  | rss 03 capitale-nationale addictions budget           | rss_03_a_6  |
| 6  | rss 03 capitale-nationale addictions budget           | rss_03_a_12 |
| 7  | rss 03 capitale-nationale addictions budget           | rss_03_a_24 |
| 8  | rss 03 capitale-nationale addictions budget           | rss_03_a_36 |
| 9  | rss 03 capitale-nationale addictions budget           | rss_03_a_48 |
| 10 | rss 03 capitale-nationale addictions budget           | rss_03_a_60 |
| 11 | rss 03 capitale-nationale addictions budget           | rss_03_a_60 |
| 12 | rss 04 mauricie et centre-du-québec addictions budget | rss_04_a_3  |
| 13 | rss 04 mauricie et centre-du-québec addictions budget | rss_04_a_6  |
| 14 | rss 04 mauricie et centre-du-québec addictions budget | rss_04_a_12 |
| 15 | rss 04 mauricie et centre-du-québec addictions budget | rss_04_a_24 |
| 16 | rss 04 mauricie et centre-du-québec addictions budget | rss_04_a_36 |
| 17 | rss 04 mauricie et centre-du-québec addictions budget | rss_04_a_48 |
| 18 | rss 04 mauricie et centre-du-québec addictions budget | rss_04_a_60 |
| 19 | rss 04 mauricie et centre-du-québec addictions budget | rss_04_a_60 |
| 20 | rss 05 estrie addictions budget                       | rss_05_a_3  |
| 21 | rss 05 estrie addictions budget                       | rss_05_a_6  |
| 22 | rss 05 estrie addictions budget                       | rss_05_a_12 |
| 23 | rss 05 estrie addictions budget                       | rss_05_a_24 |
| 24 | rss 05 estrie addictions budget                       | rss_05_a_36 |
| 25 | rss 05 estrie addictions budget                       | rss_05_a_48 |
| 26 | rss 05 estrie addictions budget                       | rss_05_a_60 |
| 27 | rss 05 estrie addictions budget                       | rss_05_a_60 |
| 28 | rss 06 montréal addictions budget                     | rss_06_a_3  |
| 29 | rss 06 montréal addictions budget                     | rss_06_a_6  |
| 30 | rss 06 montréal addictions budget                     | rss_06_a_12 |
| 31 | rss 06 montréal addictions budget                     | rss_06_a_24 |
| 32 | rss 06 montréal addictions budget                     | rss_06_a_36 |
| 33 | rss 06 montréal addictions budget                     | rss_06_a_48 |
| 34 | rss 06 montréal addictions budget                     | rss_06_a_60 |
| 35 | rss 06 montréal addictions budget                     | rss_06_a_60 |
| 36 | rss 07 outaouais addictions budget                    | rss_07_a_3  |
| 37 | rss 07 outaouais addictions budget                    | rss_07_a_6  |
| 38 | rss 07 outaouais addictions budget                    | rss_07_a_12 |
| 39 | rss 07 outaouais addictions budget                    | rss_07_a_24 |
| 40 | rss 07 outaouais addictions budget                    | rss_07_a_36 |
| 41 | rss 07 outaouais addictions budget                    | rss_07_a_48 |
| 42 | rss 07 outaouais addictions budget                    | rss_07_a_60 |
| 43 | rss 07 outaouais addictions budget                    | rss_07_a_60 |
| 44 | rss 08 abitibi-témiscamingue addictions budget        | rss_08_a_3  |
| 45 | rss 08 abitibi-témiscamingue addictions budget        | rss_08_a_6  |
| 46 | rss 08 abitibi-témiscamingue addictions budget        | rss_08_a_12 |
| 47 | rss 08 abitibi-témiscamingue addictions budget        | rss_08_a_24 |
| 48 | rss 08 abitibi-témiscamingue addictions budget        | rss_08_a_36 |
| 49 | rss 08 abitibi-témiscamingue addictions budget        | rss_08_a_48 |
| 50 | rss 08 abitibi-témiscamingue addictions budget        | rss_08_a_48 |
| 51 |                                                       |             |
| 52 |                                                       |             |
| 53 |                                                       |             |
| 54 |                                                       |             |
| 55 |                                                       |             |
| 56 |                                                       |             |
| 57 |                                                       |             |
| 58 |                                                       |             |
| 59 |                                                       |             |
| 60 |                                                       |             |

|    |                                                         |             |
|----|---------------------------------------------------------|-------------|
| 1  |                                                         |             |
| 2  |                                                         |             |
| 3  |                                                         |             |
| 4  | rss 08 abitibi-témiscamingue addictions budget          | rss_08_a_60 |
| 5  | rss 09 côte-nord addictions budget                      | rss_09_a_3  |
| 6  | rss 09 côte-nord addictions budget                      | rss_09_a_6  |
| 7  | rss 09 côte-nord addictions budget                      | rss_09_a_12 |
| 8  | rss 09 côte-nord addictions budget                      | rss_09_a_24 |
| 9  |                                                         |             |
| 10 | rss 09 côte-nord addictions budget                      | rss_09_a_36 |
| 11 | rss 09 côte-nord addictions budget                      | rss_09_a_48 |
| 12 | rss 09 côte-nord addictions budget                      | rss_09_a_60 |
| 13 |                                                         |             |
| 14 | rss 10 nord-du-québec addictions budget                 | rss_10_a_3  |
| 15 | rss 10 nord-du-québec addictions budget                 | rss_10_a_6  |
| 16 | rss 10 nord-du-québec addictions budget                 | rss_10_a_12 |
| 17 | rss 10 nord-du-québec addictions budget                 | rss_10_a_24 |
| 18 | rss 10 nord-du-québec addictions budget                 | rss_10_a_36 |
| 19 | rss 10 nord-du-québec addictions budget                 | rss_10_a_48 |
| 20 | rss 10 nord-du-québec addictions budget                 | rss_10_a_60 |
| 21 |                                                         |             |
| 22 | rss 11 gaspésie--îles-de-la-madeleine addictions budget | rss_11_a_3  |
| 23 | rss 11 gaspésie--îles-de-la-madeleine addictions budget | rss_11_a_6  |
| 24 | rss 11 gaspésie--îles-de-la-madeleine addictions budget | rss_11_a_12 |
| 25 | rss 11 gaspésie--îles-de-la-madeleine addictions budget | rss_11_a_24 |
| 26 | rss 11 gaspésie--îles-de-la-madeleine addictions budget | rss_11_a_36 |
| 27 | rss 11 gaspésie--îles-de-la-madeleine addictions budget | rss_11_a_48 |
| 28 | rss 11 gaspésie--îles-de-la-madeleine addictions budget | rss_11_a_60 |
| 29 |                                                         |             |
| 30 | rss 12 chaudière-appalaches addictions budget           | rss_12_a_3  |
| 31 | rss 12 chaudière-appalaches addictions budget           | rss_12_a_6  |
| 32 | rss 12 chaudière-appalaches addictions budget           | rss_12_a_12 |
| 33 | rss 12 chaudière-appalaches addictions budget           | rss_12_a_24 |
| 34 | rss 12 chaudière-appalaches addictions budget           | rss_12_a_36 |
| 35 | rss 12 chaudière-appalaches addictions budget           | rss_12_a_48 |
| 36 | rss 12 chaudière-appalaches addictions budget           | rss_12_a_60 |
| 37 |                                                         |             |
| 38 | rss 13 laval addictions budget                          | rss_13_a_3  |
| 39 | rss 13 laval addictions budget                          | rss_13_a_6  |
| 40 | rss 13 laval addictions budget                          | rss_13_a_12 |
| 41 | rss 13 laval addictions budget                          | rss_13_a_24 |
| 42 | rss 13 laval addictions budget                          | rss_13_a_36 |
| 43 | rss 13 laval addictions budget                          | rss_13_a_48 |
| 44 | rss 13 laval addictions budget                          | rss_13_a_60 |
| 45 |                                                         |             |
| 46 | rss 14 lanaudière addictions budget                     | rss_14_a_3  |
| 47 | rss 14 lanaudière addictions budget                     | rss_14_a_6  |
| 48 | rss 14 lanaudière addictions budget                     | rss_14_a_12 |
| 49 | rss 14 lanaudière addictions budget                     | rss_14_a_24 |
| 50 | rss 14 lanaudière addictions budget                     | rss_14_a_36 |
| 51 |                                                         |             |
| 52 |                                                         |             |
| 53 |                                                         |             |
| 54 |                                                         |             |
| 55 |                                                         |             |
| 56 |                                                         |             |
| 57 |                                                         |             |
| 58 |                                                         |             |
| 59 |                                                         |             |
| 60 |                                                         |             |



|    |                                           |                           |
|----|-------------------------------------------|---------------------------|
| 1  |                                           |                           |
| 2  |                                           |                           |
| 3  | rss 14 lanauidière addictions budget      | rss_14_a_48               |
| 4  | rss 14 lanauidière addictions budget      | rss_14_a_60               |
| 5  | rss 15 laurentides addictions budget      | rss_15_a_3                |
| 6  | rss 15 laurentides addictions budget      | rss_15_a_6                |
| 7  | rss 15 laurentides addictions budget      | rss_15_a_12               |
| 8  | rss 15 laurentides addictions budget      | rss_15_a_24               |
| 9  | rss 15 laurentides addictions budget      | rss_15_a_36               |
| 10 | rss 15 laurentides addictions budget      | rss_15_a_48               |
| 11 | rss 15 laurentides addictions budget      | rss_15_a_60               |
| 12 | rss 16 montérégie addictions budget       | rss_16_a_3                |
| 13 | rss 16 montérégie addictions budget       | rss_16_a_6                |
| 14 | rss 16 montérégie addictions budget       | rss_16_a_12               |
| 15 | rss 16 montérégie addictions budget       | rss_16_a_24               |
| 16 | rss 16 montérégie addictions budget       | rss_16_a_36               |
| 17 | rss 16 montérégie addictions budget       | rss_16_a_48               |
| 18 | rss 16 montérégie addictions budget       | rss_16_a_60               |
| 19 | regional mental health budget (\$/capita) | region_mhbudget_2018-2019 |
| 20 | regional mental health budget (\$/capita) | region_mhbudget_2017-2018 |
| 21 | regional mental health budget (\$/capita) | region_mhbudget_2016-2017 |
| 22 | regional mental health budget (\$/capita) | region_mhbudget_2015-2016 |
| 23 | regional addictions budget (\$/capita)    | region_abudget_2018-2019  |
| 24 | regional addictions budget (\$/capita)    | region_abudget_2017-2018  |
| 25 | regional addictions budget (\$/capita)    | region_abudget_2016-2017  |
| 26 | regional addictions budget (\$/capita)    | region_abudget_2015-2016  |
| 27 |                                           |                           |
| 28 |                                           |                           |
| 29 |                                           |                           |
| 30 |                                           |                           |
| 31 |                                           |                           |
| 32 |                                           |                           |
| 33 |                                           |                           |
| 34 |                                           |                           |
| 35 |                                           |                           |
| 36 |                                           |                           |
| 37 |                                           |                           |
| 38 |                                           |                           |
| 39 |                                           |                           |
| 40 |                                           |                           |
| 41 |                                           |                           |
| 42 |                                           |                           |
| 43 |                                           |                           |
| 44 |                                           |                           |
| 45 |                                           |                           |
| 46 |                                           |                           |
| 47 |                                           |                           |
| 48 |                                           |                           |
| 49 |                                           |                           |
| 50 |                                           |                           |
| 51 |                                           |                           |
| 52 |                                           |                           |
| 53 |                                           |                           |
| 54 |                                           |                           |
| 55 |                                           |                           |
| 56 |                                           |                           |
| 57 |                                           |                           |
| 58 |                                           |                           |
| 59 |                                           |                           |
| 60 |                                           |                           |

## ii. QUALITY OF CARE INDICATORS (QUALITYCARE)

- quality of anxiety or depressive disorders mental health services follow-up in primary care (continuous)
- quality of mental health services depression disorder mental health services follow-up in primary care (continuous)
- quality of substance use disorder mental health services follow-up in primary care (continuous)
- quality of mental health care services follow-up after hospitalization: readmission within 30 days (continuous)
- quality of mental health services follow-up in primary care after suicide attempt (continuous)
- quality of community mental health services (continuous)
- quality of community mental health services of patients with severe mental illness (continuous)
- quality of community mental health services of patients with common mental disorders (continuous)
- quality of community mental health services of patients with personality disorders (continuous)
- adequate use of emergency room for mental health service (continuous)

| derived variables                                                                                        | variable name          |
|----------------------------------------------------------------------------------------------------------|------------------------|
| quality of anxiety or depressive disorders mental health services follow-up in primary care (continuous) | qfu_primcare_anxdep_3  |
| quality of anxiety or depressive disorders mental health services follow-up in primary care (continuous) | qfu_primcare_anxdep_6  |
| quality of anxiety or depressive disorders mental health services follow-up in primary care (continuous) | qfu_primcare_anxdep_12 |
| quality of anxiety or depressive disorders mental health services follow-up in primary care (continuous) | qfu_primcare_anxdep_24 |
| quality of anxiety or depressive disorders mental health services follow-up in primary care (continuous) | qfu_primcare_anxdep_36 |
| quality of anxiety or depressive disorders mental health services follow-up in primary care (continuous) | qfu_primcare_anxdep_48 |
| quality of anxiety or depressive disorders mental health services follow-up in primary care (continuous) | qfu_primcare_anxdep_60 |
| quality of depression disorder mental health services follow-up in primary care (continuous)             | qfu_primcare_dep_3     |
| quality of depression disorder mental health services follow-up in primary care (continuous)             | qfu_primcare_dep_6     |
| quality of depression disorder mental health services follow-up in primary care (continuous)             | qfu_primcare_dep_12    |
| quality of depression disorder mental health services follow-up in primary care (continuous)             | qfu_primcare_dep_24    |
| quality of depression disorder mental health services follow-up in primary care (continuous)             | qfu_primcare_dep_36    |
| quality of depression disorder mental health services follow-up in primary care (continuous)             | qfu_primcare_dep_48    |
| quality of depression disorder mental health services follow-up in primary care (continuous)             | qfu_primcare_dep_60    |
| quality of substance use disorder mental health services follow-up in primary care (continuous)          | qfu_primcare_sud_3     |
| quality of substance use disorder mental health services follow-up in primary care (continuous)          | qfu_primcare_sud_6     |
| quality of substance use disorder mental health services follow-up in primary care (continuous)          | qfu_primcare_sud_12    |

|                       |                                                                                                                 |                                   |
|-----------------------|-----------------------------------------------------------------------------------------------------------------|-----------------------------------|
| 1<br>2<br>3<br>4<br>5 | quality of substance use disorder mental health services follow-up in primary care (continuous)                 | qfu_primcare_sud_24               |
| 6<br>7                | quality of substance use disorder mental health services follow-up in primary care (continuous)                 | qfu_primcare_sud_36               |
| 8<br>9<br>10          | quality of substance use disorder mental health services follow-up in primary care (continuous)                 | qfu_primcare_sud_48               |
| 11<br>12              | quality of substance use disorder mental health services follow-up in primary care (continuous)                 | qfu_primcare_sud_60               |
| 13<br>14<br>15<br>16  | quality of mental health care services follow-up after hospitalization: readmission within 30 days (continuous) | qfu_posthosp_readmit30_3          |
| 17<br>18<br>19        | quality of mental health care services follow-up after hospitalization: readmission within 30 days (continuous) | qfu_posthosp_readmit30_6          |
| 20<br>21<br>22        | quality of mental health care services follow-up after hospitalization: readmission within 30 days (continuous) | qfu_posthosp_readmit30_12         |
| 23<br>24<br>25<br>26  | quality of mental health care services follow-up after hospitalization: readmission within 30 days (continuous) | qfu_posthosp_readmit30_24         |
| 27<br>28<br>29        | quality of mental health care services follow-up after hospitalization: readmission within 30 days (continuous) | qfu_posthosp_readmit30_36         |
| 30<br>31<br>32<br>33  | quality of mental health care services follow-up after hospitalization: readmission within 30 days (continuous) | qfu_posthosp_readmit30_48         |
| 34<br>35<br>36        | quality of mental health care services follow-up after hospitalization: readmission within 30 days (continuous) | qfu_posthosp_readmit30_60         |
| 37<br>38<br>39        | quality of mental health services followup in primary care after suicide attempt (continuous)                   | qfu_primcare_postsucideattempt_3  |
| 40<br>41              | quality of mental health services followup in primary care after suicide attempt (continuous)                   | qfu_primcare_postsucideattempt_6  |
| 42<br>43<br>44        | quality of mental health services followup in primary care after suicide attempt (continuous)                   | qfu_primcare_postsucideattempt_12 |
| 45<br>46              | quality of mental health services followup in primary care after suicide attempt (continuous)                   | qfu_primcare_postsucideattempt_24 |
| 47<br>48              | quality of mental health services followup in primary care after suicide attempt (continuous)                   | qfu_primcare_postsucideattempt_36 |
| 49<br>50              | quality of mental health services followup in primary care after suicide attempt (continuous)                   | qfu_primcare_postsucideattempt_48 |
| 51<br>52              | quality of mental health services followup in primary care after suicide attempt (continuous)                   | qfu_primcare_postsucideattempt_60 |
| 53<br>54<br>55<br>56  | quality of community mental health services (continuous)                                                        | qcomserv_3                        |

|    |                                                                                                         |                    |
|----|---------------------------------------------------------------------------------------------------------|--------------------|
| 1  | quality of community mental health services<br>(continuous)                                             | qcomserv_6         |
| 2  |                                                                                                         |                    |
| 3  | quality of community mental health services<br>(continuous)                                             | qcomserv_12        |
| 4  |                                                                                                         |                    |
| 5  | quality of community mental health services<br>(continuous)                                             | qcomserv_24        |
| 6  |                                                                                                         |                    |
| 7  | quality of community mental health services<br>(continuous)                                             | qcomserv_36        |
| 8  |                                                                                                         |                    |
| 9  | quality of community mental health services<br>(continuous)                                             | qcomserv_48        |
| 10 |                                                                                                         |                    |
| 11 | quality of community mental health services<br>(continuous)                                             | qcomserv_60        |
| 12 |                                                                                                         |                    |
| 13 | quality of community mental health services of<br>patients with severe mental illness (continuous)      | qcomserv_severe_3  |
| 14 |                                                                                                         |                    |
| 15 | quality of community mental health services of<br>patients with severe mental illness (continuous)      | qcomserv_severe_6  |
| 16 |                                                                                                         |                    |
| 17 | quality of community mental health services of<br>patients with severe mental illness (continuous)      | qcomserv_severe_12 |
| 18 |                                                                                                         |                    |
| 19 | quality of community mental health services of<br>patients with severe mental illness (continuous)      | qcomserv_severe_24 |
| 20 |                                                                                                         |                    |
| 21 | quality of community mental health services of<br>patients with severe mental illness (continuous)      | qcomserv_severe_36 |
| 22 |                                                                                                         |                    |
| 23 | quality of community mental health services of<br>patients with severe mental illness (continuous)      | qcomserv_severe_48 |
| 24 |                                                                                                         |                    |
| 25 | quality of community mental health services of<br>patients with severe mental illness (continuous)      | qcomserv_severe_60 |
| 26 |                                                                                                         |                    |
| 27 | quality of community mental health services of<br>patients with common mental disorders<br>(continuous) | qcomserv_cmd_3     |
| 28 |                                                                                                         |                    |
| 29 | quality of community mental health services of<br>patients with common mental disorders<br>(continuous) | qcomserv_cmd_6     |
| 30 |                                                                                                         |                    |
| 31 | quality of community mental health services of<br>patients with common mental disorders<br>(continuous) | qcomserv_cmd_12    |
| 32 |                                                                                                         |                    |
| 33 | quality of community mental health services of<br>patients with common mental disorders<br>(continuous) | qcomserv_cmd_24    |
| 34 |                                                                                                         |                    |
| 35 | quality of community mental health services of<br>patients with common mental disorders<br>(continuous) | qcomserv_cmd_36    |
| 36 |                                                                                                         |                    |
| 37 | quality of community mental health services of<br>patients with common mental disorders<br>(continuous) | qcomserv_cmd_48    |
| 38 |                                                                                                         |                    |
| 39 | quality of community mental health services of<br>patients with common mental disorders<br>(continuous) |                    |
| 40 |                                                                                                         |                    |
| 41 |                                                                                                         |                    |
| 42 |                                                                                                         |                    |
| 43 |                                                                                                         |                    |
| 44 |                                                                                                         |                    |
| 45 |                                                                                                         |                    |
| 46 |                                                                                                         |                    |
| 47 |                                                                                                         |                    |
| 48 |                                                                                                         |                    |
| 49 |                                                                                                         |                    |
| 50 |                                                                                                         |                    |
| 51 |                                                                                                         |                    |
| 52 |                                                                                                         |                    |
| 53 |                                                                                                         |                    |
| 54 |                                                                                                         |                    |
| 55 |                                                                                                         |                    |
| 56 |                                                                                                         |                    |
| 57 |                                                                                                         |                    |
| 58 |                                                                                                         |                    |
| 59 |                                                                                                         |                    |
| 60 |                                                                                                         |                    |

|                                                                                                   |                 |
|---------------------------------------------------------------------------------------------------|-----------------|
| quality of community mental health services of patients with common mental disorders (continuous) | qcomserv_cmd_60 |
| quality of community mental health services of patients with personality disorders (continuous)   | qcomserv_pd_3   |
| quality of community mental health services of patients with personality disorders (continuous)   | qcomserv_pd_6   |
| quality of community mental health services of patients with personality disorders (continuous)   | qcomserv_pd_12  |
| quality of community mental health services of patients with personality disorders (continuous)   | qcomserv_pd_24  |
| quality of community mental health services of patients with personality disorders (continuous)   | qcomserv_pd_36  |
| quality of community mental health services of patients with personality disorders (continuous)   | qcomserv_pd_48  |
| quality of community mental health services of patients with personality disorders (continuous)   | qcomserv_pd_60  |
| adequate use of emergency room for mental health service (continuous)                             | aduse_er_3      |
| adequate use of emergency room for mental health service (continuous)                             | aduse_er_6      |
| adequate use of emergency room for mental health service (continuous)                             | aduse_er_12     |
| adequate use of emergency room for mental health service (continuous)                             | aduse_er_24     |
| adequate use of emergency room for mental health service (continuous)                             | aduse_er_36     |
| adequate use of emergency room for mental health service (continuous)                             | aduse_er_48     |
| adequate use of emergency room for mental health service (continuous)                             | aduse_er_60     |

## APPENDIX A: CLASSES\_MEDICAMENTS\_CAROLINE SIROIS 30

### AVRIL.XLSX

#### Mental health medication

| Psychotropic medications |           |             |                           |  |  |  |
|--------------------------|-----------|-------------|---------------------------|--|--|--|
| Group                    | Sub-group | Medications | Common denomination codes |  |  |  |
|                          |           |             |                           |  |  |  |

| Antipsychotics |          |                   |       |                                        |  |
|----------------|----------|-------------------|-------|----------------------------------------|--|
|                | Typical  |                   |       |                                        |  |
|                |          | Chlopromazine     | 1924  |                                        |  |
|                |          | Flupenthixol      | 41863 |                                        |  |
|                |          |                   | 43202 |                                        |  |
|                |          | Fluphenazine      | 4056  |                                        |  |
|                |          |                   | 4069  |                                        |  |
|                |          |                   | 34284 |                                        |  |
|                |          | Haloperidol       | 4394  |                                        |  |
|                |          |                   | 43540 |                                        |  |
|                |          |                   | 43826 |                                        |  |
|                |          |                   | 46292 |                                        |  |
|                |          | Loxapine          | 34219 |                                        |  |
|                |          |                   | 37612 |                                        |  |
|                |          |                   | 40745 |                                        |  |
|                |          | Methotrimeprazine | 6045  |                                        |  |
|                |          | Perphenazine      | 7176  |                                        |  |
|                |          |                   | 46011 | (In combination with<br>amitryptiline) |  |
|                |          | Pimozide          | 33465 |                                        |  |
|                |          | Pipotiazine       | 41707 |                                        |  |
|                |          | Prochlorperazine  | 45458 |                                        |  |
|                |          |                   | 45528 |                                        |  |
|                |          |                   | 8125  |                                        |  |
|                |          | Thioridazine      | 9594  |                                        |  |
|                |          | Thiopropazine     | 9568  |                                        |  |
|                |          | Trifluoperazine   | 9802  |                                        |  |
|                |          |                   | 34440 |                                        |  |
|                |          |                   | 46108 | (In combination with<br>isopropamide)  |  |
|                |          | Zuclopenthixol    | 47136 |                                        |  |
|                |          |                   | 47137 |                                        |  |
|                |          |                   | 47138 |                                        |  |
|                |          |                   |       |                                        |  |
|                |          |                   |       |                                        |  |
|                | Atypical | Asenapine         | 47921 |                                        |  |
|                |          | Aripiprazole      | 47801 |                                        |  |
|                |          | Brexpiprazole     | 48153 |                                        |  |
|                |          | Clozapine         | 45580 |                                        |  |
|                |          | Lurasidone        | 47939 |                                        |  |

|    |                                                                                 |                 |       |                                       |  |
|----|---------------------------------------------------------------------------------|-----------------|-------|---------------------------------------|--|
| 1  |                                                                                 | Olanzapine      | 46318 |                                       |  |
| 2  |                                                                                 |                 | 47197 |                                       |  |
| 3  |                                                                                 | Paliperidone    | 47708 |                                       |  |
| 4  |                                                                                 |                 | 47861 |                                       |  |
| 5  |                                                                                 | Quetiapine      | 47267 |                                       |  |
| 6  |                                                                                 | Risperidone     | 46156 |                                       |  |
| 7  |                                                                                 |                 | 47052 |                                       |  |
| 8  |                                                                                 | Ziprazidone     | 47717 |                                       |  |
| 9  |                                                                                 |                 |       |                                       |  |
| 10 |                                                                                 |                 |       |                                       |  |
| 11 |                                                                                 |                 |       |                                       |  |
| 12 |                                                                                 |                 |       |                                       |  |
| 13 |                                                                                 |                 |       |                                       |  |
| 14 |                                                                                 |                 |       |                                       |  |
| 15 |                                                                                 |                 |       |                                       |  |
| 16 |                                                                                 |                 |       |                                       |  |
| 17 |                                                                                 |                 |       |                                       |  |
| 18 | <b>Antidepressants - Those mostly used for depression and anxiety disorders</b> |                 |       |                                       |  |
| 19 |                                                                                 |                 |       |                                       |  |
| 20 |                                                                                 |                 |       |                                       |  |
| 21 | SSRIs                                                                           | Citalopram      | 46543 |                                       |  |
| 22 |                                                                                 |                 | 47317 |                                       |  |
| 23 |                                                                                 | Escitalopram    | 47553 |                                       |  |
| 24 |                                                                                 |                 | 47971 |                                       |  |
| 25 |                                                                                 | Fluoxetine      | 45504 |                                       |  |
| 26 |                                                                                 | Fluvoxamine     | 45633 |                                       |  |
| 27 |                                                                                 | Paroxetine      | 47061 |                                       |  |
| 28 |                                                                                 | Sertraline      | 45630 |                                       |  |
| 29 |                                                                                 |                 |       |                                       |  |
| 30 |                                                                                 |                 |       |                                       |  |
| 31 |                                                                                 |                 |       |                                       |  |
| 32 |                                                                                 |                 |       |                                       |  |
| 33 |                                                                                 |                 |       |                                       |  |
| 34 |                                                                                 |                 |       |                                       |  |
| 35 | SNRIs                                                                           | Desvenlafaxine  | 47770 |                                       |  |
| 36 |                                                                                 | Duloxetine      | 47714 |                                       |  |
| 37 |                                                                                 | Levomilnacipran | 48075 |                                       |  |
| 38 |                                                                                 | Venlafaxine     | 46244 |                                       |  |
| 39 |                                                                                 |                 | 47118 |                                       |  |
| 40 |                                                                                 |                 |       |                                       |  |
| 41 |                                                                                 |                 |       |                                       |  |
| 42 |                                                                                 |                 |       |                                       |  |
| 43 | NDRIs                                                                           | Bupropion       | 46435 | (Also used for tobacco cessation)     |  |
| 44 |                                                                                 |                 | 47285 |                                       |  |
| 45 |                                                                                 |                 | 48205 | (In combination with naltrexone)      |  |
| 46 |                                                                                 |                 |       |                                       |  |
| 47 |                                                                                 |                 |       |                                       |  |
| 48 |                                                                                 |                 |       |                                       |  |
| 49 |                                                                                 |                 |       |                                       |  |
| 50 | NaSSAs                                                                          | Mirtazapine     | 46744 | (Also used in low doses for insomnia) |  |
| 51 |                                                                                 |                 | 47408 |                                       |  |
| 52 |                                                                                 |                 |       |                                       |  |
| 53 |                                                                                 |                 |       |                                       |  |
| 54 |                                                                                 |                 |       |                                       |  |
| 55 | MAOI                                                                            | Phenelzine      | 7280  |                                       |  |
| 56 |                                                                                 |                 |       |                                       |  |
| 57 |                                                                                 |                 |       |                                       |  |
| 58 |                                                                                 |                 |       |                                       |  |
| 59 |                                                                                 |                 |       |                                       |  |
| 60 |                                                                                 |                 |       |                                       |  |

|                                                                                                             |                            |                 |       |                                 |  |
|-------------------------------------------------------------------------------------------------------------|----------------------------|-----------------|-------|---------------------------------|--|
|                                                                                                             |                            | Tranlycypromine | 9698  |                                 |  |
|                                                                                                             |                            |                 |       |                                 |  |
|                                                                                                             | IRMA                       | Moclobemide     | 46427 |                                 |  |
|                                                                                                             |                            |                 | 47005 |                                 |  |
|                                                                                                             |                            |                 |       |                                 |  |
|                                                                                                             | SRI+ 5HT1a partial agonist | Vilazodone      | 48227 |                                 |  |
|                                                                                                             |                            |                 |       |                                 |  |
|                                                                                                             | Serotonin modulator        | Vortioxetine    | 48038 |                                 |  |
|                                                                                                             |                            |                 |       |                                 |  |
|                                                                                                             |                            |                 |       |                                 |  |
| <b>Other antidepressants - Those mostly used for other indications than depression or anxiety disorders</b> |                            |                 |       |                                 |  |
|                                                                                                             |                            |                 |       |                                 |  |
|                                                                                                             | Tricyclics                 | Amitryptiline   | 429   |                                 |  |
|                                                                                                             |                            |                 | 46011 | (Combination with perphenazine) |  |
|                                                                                                             |                            | Clomipramine    | 14781 |                                 |  |
|                                                                                                             |                            | Desipramine     | 2522  |                                 |  |
|                                                                                                             |                            | Doxepine        | 3198  |                                 |  |
|                                                                                                             |                            | Imipramine      | 4784  |                                 |  |
|                                                                                                             |                            | Nortriptyline   | 6578  |                                 |  |
|                                                                                                             |                            | Trimipramine    | 9906  |                                 |  |
|                                                                                                             |                            |                 |       |                                 |  |
|                                                                                                             |                            |                 |       |                                 |  |
|                                                                                                             | Inh. S recap + antag 5-HT2 | Trazodone       | 43137 |                                 |  |
|                                                                                                             |                            |                 |       |                                 |  |
|                                                                                                             |                            |                 |       |                                 |  |
| <b>Mood stabilizers (other than antipsychotics and other medications included in other classes)</b>         |                            |                 |       |                                 |  |
|                                                                                                             |                            |                 |       |                                 |  |
|                                                                                                             |                            | Carbamazepine   | 1404  |                                 |  |
|                                                                                                             |                            |                 | 10270 |                                 |  |
|                                                                                                             |                            | Gabapentin      | 46229 |                                 |  |
|                                                                                                             |                            |                 | 47100 |                                 |  |
|                                                                                                             |                            | Lamotrigine     | 47110 |                                 |  |
|                                                                                                             |                            |                 | 46248 |                                 |  |
|                                                                                                             |                            | Lithium         | 47071 |                                 |  |
|                                                                                                             |                            |                 | 47237 |                                 |  |





|                            |                           |              |       |  |
|----------------------------|---------------------------|--------------|-------|--|
|                            |                           |              | 39302 |  |
|                            |                           | Guanfacine   | 47979 |  |
|                            |                           |              |       |  |
| <b>Alzheimer's disease</b> |                           |              |       |  |
|                            | Inh. Acetylcholinesterase | Donepezil    | 47352 |  |
|                            |                           | Galantamine  | 47415 |  |
|                            |                           |              | 46767 |  |
|                            |                           | Rivastigmine | 47726 |  |
|                            |                           |              | 46673 |  |
|                            |                           |              | 47368 |  |
|                            | NMDA                      | Memantine    | 47542 |  |

## Medication classes – other

| MAIN CLASSES                   | Sub-classes that may be studied | AHFS codes or Medications |                                                  |  |  |  |                                                                   |
|--------------------------------|---------------------------------|---------------------------|--------------------------------------------------|--|--|--|-------------------------------------------------------------------|
| <b>Diabetes</b>                |                                 | AHFS sub-class            |                                                  |  |  |  |                                                                   |
|                                |                                 | 68:20                     | Antidiabetes                                     |  |  |  |                                                                   |
| <b>Cardiovascular diseases</b> |                                 |                           |                                                  |  |  |  |                                                                   |
|                                |                                 | AFHS sub-class            |                                                  |  |  |  |                                                                   |
|                                | Antithrombotics                 | 20:12                     | Antithrombotics (anticoagulants, antiplatelets)  |  |  |  | et ajouter les CODES DÉNOMINATIONS COMMUNE ASPIRINE: 143 et 46353 |
|                                | Antihypertensive agents         | 24:08                     | Antihypertensives (alpha-agonists, vasodilators) |  |  |  |                                                                   |
|                                |                                 | 24:20                     | Alpha-blockers                                   |  |  |  |                                                                   |
|                                |                                 | 24:24                     | Beta-blockers                                    |  |  |  |                                                                   |
|                                |                                 | 24:28                     | Calcium channel blockers                         |  |  |  |                                                                   |
|                                |                                 | 24:32                     | ACE inhibitors and ARBs                          |  |  |  |                                                                   |

|                                                                        |                                |                            |                                              |                           |  |                                                                  |
|------------------------------------------------------------------------|--------------------------------|----------------------------|----------------------------------------------|---------------------------|--|------------------------------------------------------------------|
|                                                                        |                                | 40:28                      | Diuretics                                    |                           |  |                                                                  |
|                                                                        | Antiarrhythmic and cardiotonic | 24:04                      | Cardiotropic (antiarrhythmics, cardiotonics) |                           |  |                                                                  |
|                                                                        | Hypolipemians                  | 24:06                      | Hypolipemians (statins, fibrates, etc)       |                           |  |                                                                  |
|                                                                        | Vasodilators                   | 24:12                      | Nitrates and other vasodilators              |                           |  |                                                                  |
|                                                                        |                                |                            |                                              |                           |  |                                                                  |
| <b>Respiratory diseases</b> (mediations used to treat COPD and asthma) |                                |                            |                                              |                           |  |                                                                  |
|                                                                        |                                | Medications                |                                              | Code denomination commune |  |                                                                  |
|                                                                        |                                | Acclidinium                |                                              | 47986                     |  |                                                                  |
|                                                                        |                                | Glycopyrronium             |                                              | 47949                     |  |                                                                  |
|                                                                        |                                | Tiotropium                 |                                              | 46856                     |  |                                                                  |
|                                                                        |                                | Uméclidinium               |                                              | 48109                     |  |                                                                  |
|                                                                        |                                | Formotérol                 |                                              | 47916                     |  |                                                                  |
|                                                                        |                                | Indacatérol                |                                              | 47923                     |  |                                                                  |
|                                                                        |                                | Salmétérol                 |                                              | 46247                     |  |                                                                  |
|                                                                        |                                |                            |                                              | 47112                     |  |                                                                  |
|                                                                        |                                | Olodatérol                 |                                              |                           |  |                                                                  |
|                                                                        |                                | Glycopyrronium/indacatérol |                                              | 48033                     |  |                                                                  |
|                                                                        |                                | Uméclidinium/vilantérol    |                                              | 48224                     |  |                                                                  |
|                                                                        |                                |                            |                                              | 48029                     |  |                                                                  |
|                                                                        |                                | Aclidinium/formotérol      |                                              |                           |  |                                                                  |
|                                                                        |                                | Tiotropium/Olodatérol      |                                              | 48064                     |  |                                                                  |
|                                                                        |                                | Budésonide/formotérol      |                                              | 47428                     |  |                                                                  |
|                                                                        |                                |                            |                                              | 46800                     |  |                                                                  |
|                                                                        |                                |                            |                                              | 47917                     |  |                                                                  |
|                                                                        |                                |                            |                                              | 47925                     |  |                                                                  |
|                                                                        |                                | Fluticasone/salmétérol     |                                              | 46597                     |  |                                                                  |
|                                                                        |                                |                            |                                              | 47335                     |  |                                                                  |
|                                                                        |                                | Fluticasone/vilantérol     |                                              | 48006                     |  |                                                                  |
|                                                                        |                                | Salbutamol                 |                                              | 10530                     |  | Exclure les codes de forme: 116, 203,435, 2262, 2088, 2117, 4147 |
|                                                                        |                                |                            |                                              | 33634                     |  |                                                                  |
|                                                                        |                                |                            |                                              | 46737                     |  |                                                                  |



|                              |  |                             |                                                   |                                                                 |                                           |      |
|------------------------------|--|-----------------------------|---------------------------------------------------|-----------------------------------------------------------------|-------------------------------------------|------|
|                              |  |                             |                                                   | 56:14                                                           | Cholelitholytics                          |      |
|                              |  |                             |                                                   | 56:16                                                           | Digestives                                |      |
|                              |  |                             |                                                   | 56:22                                                           | Anti-emetics                              |      |
|                              |  |                             |                                                   | 56:28                                                           | Anti-acids                                |      |
|                              |  |                             |                                                   | 56:32                                                           | Prokinetics                               |      |
|                              |  |                             |                                                   | 56:36                                                           | Gastro-intestinal anti-inflammatory drugs |      |
|                              |  |                             |                                                   | 56:92                                                           | Miscellaneous                             |      |
|                              |  |                             |                                                   |                                                                 |                                           |      |
| <b>Anti-infective agents</b> |  | <b>AHFS class</b>           |                                                   | (Example of sub-classes that are included in the the 08. class) |                                           |      |
|                              |  | 08.xx                       |                                                   | 8:08                                                            | Anthelmintics                             |      |
|                              |  |                             |                                                   | 8:12                                                            | Antibacterials                            |      |
|                              |  |                             |                                                   | 8:14                                                            | Antifungals                               |      |
|                              |  |                             |                                                   | 8:16                                                            | Antimycobacterials                        |      |
|                              |  |                             |                                                   | 8:18                                                            | Antivirals                                |      |
|                              |  |                             |                                                   | 8:30                                                            | Antiprotozoals                            |      |
|                              |  |                             |                                                   | 8:36                                                            | Urinary Anti-infectives                   |      |
|                              |  |                             |                                                   | 9:32                                                            | Anti-Infectives, Miscellaneous            |      |
|                              |  |                             |                                                   |                                                                 |                                           |      |
|                              |  |                             |                                                   |                                                                 |                                           |      |
|                              |  |                             |                                                   |                                                                 |                                           |      |
| <b>Antineoplastic agents</b> |  | <b>AHFS class</b>           |                                                   |                                                                 |                                           |      |
|                              |  | 10.xx                       |                                                   |                                                                 |                                           |      |
|                              |  |                             |                                                   |                                                                 |                                           |      |
|                              |  |                             |                                                   |                                                                 |                                           |      |
| <b>Pain</b>                  |  | <b>AHFS subclass</b>        |                                                   |                                                                 |                                           |      |
|                              |  | 28:08                       | Analgesic and antipyretics (NSAIDs, opioids, etc) |                                                                 |                                           | SAUF |
|                              |  | <b>Specific medications</b> |                                                   | <b>Codes denomination commune</b>                               |                                           |      |
|                              |  | Cyclobenzaprine             |                                                   | 46516                                                           |                                           |      |
|                              |  |                             |                                                   | 38873                                                           |                                           |      |

|                                                                                                                 |                       |               |       |            |  |  |  |
|-----------------------------------------------------------------------------------------------------------------|-----------------------|---------------|-------|------------|--|--|--|
|                                                                                                                 |                       | Baclofene     |       | 41447      |  |  |  |
|                                                                                                                 |                       |               |       | 46337      |  |  |  |
|                                                                                                                 |                       | Orphenadrine  |       | 46094      |  |  |  |
|                                                                                                                 |                       |               |       | 46254      |  |  |  |
|                                                                                                                 |                       |               |       | 6734       |  |  |  |
|                                                                                                                 |                       |               |       |            |  |  |  |
|                                                                                                                 | <b>Contraceptives</b> | AHFS subclass | 68:12 | Anovulants |  |  |  |
|                                                                                                                 |                       |               |       |            |  |  |  |
| Not included: Glaucoma, Osteoporosis, ear/eyes/nose drugs, corticosteroids, skin medications, Parkinson disease |                       |               |       |            |  |  |  |

## APPENDIX I\_2: LIST OF THE CANDIDATE INDICATORS AT THE PROGRAMMATIC AND SYSTEM LEVELS SUPPORTED BY THE HEALTH SERVICES AND PUBLIC HEALTH LITERATURE OR PRACTICES

**TABLE 2**  
List of the candidate indicators at the programmatic and system levels supported by the health services and public health literature or practices

| Candidate indicators                                                                                  | Aim                                                                                                                      | Literature support                                                                                                                                                        | Description                                                                                                                                                                                                                       | Measure                                                                                                                                      | Data sources                                                       |
|-------------------------------------------------------------------------------------------------------|--------------------------------------------------------------------------------------------------------------------------|---------------------------------------------------------------------------------------------------------------------------------------------------------------------------|-----------------------------------------------------------------------------------------------------------------------------------------------------------------------------------------------------------------------------------|----------------------------------------------------------------------------------------------------------------------------------------------|--------------------------------------------------------------------|
| 1. Quality of anxiety or depressive disorders mental health services follow-up in primary care        | Determine adequate care for patient diagnosed with anxiety and depressive disorders in primary care                      | Based on number of physician visits by Wang, et al. <sup>44</sup> and other studies <sup>47,48</sup>                                                                      | Denominator: Individuals aged 15+ years with an anxiety or depressive disorder diagnosis by a General Practitioner (GP) in a given year<br><br>Numerator: Received ≥ 4 visits for mental health in that year                      | Prevalence of individuals 15+ years who received an anxiety or depressive disorder diagnosis with ≥ 4 visits for mental health               | QICDSS                                                             |
| 2. Quality of depression disorder mental health services follow-up in primary care                    | Determine adequate care for patient diagnosed with depression in primary care                                            | Based on number of physician visits by Wang, et al. <sup>44</sup> and other studies <sup>47,48</sup>                                                                      | Denominator: Individuals aged 15+ years with a diagnosis of depression by a General Practitioner (GP) in a given year<br><br>Numerator: Received ≥ 4 visits for mental health in that year                                        | Prevalence of individuals 15+ years who received a depression diagnosis with ≥ 4 visits for mental health                                    | QICDSS                                                             |
| 3. Quality of substance use disorder mental health services follow-up in primary care                 | Determine adequate care for patient diagnosed with substance use disorder in primary care                                | Based on 4 visits with a family physician for counseling as recommended by NICE <sup>56</sup> and the guidelines for American primary care clinicians <sup>58</sup>       | Denominator: Individuals aged 15+ years with a diagnosis of substance use disorder by a General Practitioner (GP) in a given year<br><br>Numerator: Received ≥ 4 visits for mental health in that year                            | Prevalence of individuals 15+ years who received a substance use disorder diagnosis with ≥ 4 visits for mental health                        | QICDSS                                                             |
| 4. Quality of mental health care services follow-up after hospitalization: readmission within 30 days | Determine the quality of mental specialist health care and in-hospital care                                              | Based on the work of the Canadian Institute for Health Information (CIHI) <sup>45,47,48</sup>                                                                             | Denominator: Individuals aged 15+ years admitted in a hospital with a mental health diagnosis in a given year<br><br>Numerator: Individual readmitted for mental health within 30 days of initial discharge                       | Prevalence of individuals 15+ years who were readmitted to a hospital for a mental health diagnosis within 30 days of initial discharge      | QICDSS                                                             |
| 5. Quality of mental health services follow-up in primary care after suicide attempt                  | Determine the quality of mental health care of readmission rates in the region compared to others                        | Based on the work of the Canadian Institute for Health Information (CIHI) <sup>45,47,48</sup>                                                                             | Denominator: Individuals aged 15+ years admitted to a hospital for suicide attempt in a given year<br><br>Numerator: Received ≥ 1 visit to a physician for mental health within 30 days of hospital discharge for suicide attempt | Prevalence of individuals 15+ years who received ≥ 1 visit from a physician within 30 days of initial discharge for suicide attempt          | QICDSS (linked to MedEcho for suicide attempt) <sup>40,41,50</sup> |
| 6. Quality of community mental health services                                                        | Determine the balance of the community-oriented mental health care system                                                | Based on the typologies of primary and specialist (including in-hospital care) mental health care <sup>45,46,54</sup> used in the study of suicide attempts <sup>55</sup> | Denominator: Individuals aged 15+ years with a mental health diagnosis in a given year<br><br>Numerator: Individuals with exclusively outpatient services – psychiatric or general practitioner (GP)                              | Prevalence of individuals 15+ years who received a mental health disorder diagnosis with exclusively outpatient services (psychiatric or GP) | QICDSS                                                             |
| 7. Quality of community mental health services of patients with severe mental illness                 | Determine the balance of psychiatric outpatient and primary outpatient care depending on the profiles used <sup>45</sup> | Based on the associations found for the balance between primary and specialist mental health care and suicide rates <sup>2,46,60,61</sup>                                 | Denominator: Individuals aged 15+ years with exclusively a GP or a psychiatric outpatient visit for psychotic disorder<br><br>Numerator: Number of individuals with exclusively a GP or psychiatrist outpatient visits            | Prevalence of individuals 15+ years who received a severe mental illness disorder diagnosis and used exclusively outpatient services by a GP | QICDSS                                                             |
| 8. Quality of community mental health services of patients with common mental disorders               | Determine the balance of psychiatric outpatient and primary outpatient care depending on the profiles used <sup>45</sup> | Based on the associations found for the balance between primary and specialist mental health care and suicide rates <sup>2,46,60,61</sup>                                 | Denominator: Individuals aged 15+ years with a psychiatric or a GP outpatient visit for depression<br><br>Numerator: Number of individuals with exclusively GP outpatient visits                                                  | Prevalence of individuals 15+ years who received a common mental disorder diagnosis and used exclusively outpatient services by a GP         | QICDSS                                                             |

Continued on the following page

**TABLE 2 (continued)**  
**List of the candidate indicators at the programmatic and system levels supported by the health services and public health literature or practices**

| Candidate indicators                                                                    | Aim                                                                                                                                           | Literature support                                                                                                                        | Description                                                                                                                                                                                                             | Measure                                                                                                                                  | Data sources                                                                                         |
|-----------------------------------------------------------------------------------------|-----------------------------------------------------------------------------------------------------------------------------------------------|-------------------------------------------------------------------------------------------------------------------------------------------|-------------------------------------------------------------------------------------------------------------------------------------------------------------------------------------------------------------------------|------------------------------------------------------------------------------------------------------------------------------------------|------------------------------------------------------------------------------------------------------|
| 9. Quality of community mental health services of patients with substance use disorders | Determine the balance of psychiatric outpatient and primary outpatient care depending on the profiles used <sup>5,55</sup>                    | Based on the associations found for the balance between primary and specialist mental health care and suicide rates <sup>2,46,60,61</sup> | Denominator: Individuals aged 15+ years with a psychiatric or a GP outpatient visit for substance use disorder<br><br>Numerator: Number of individuals with exclusively GP outpatient visits                            | Prevalence of individuals 15+ years who received a substance use disorder diagnosis and used exclusively outpatient services by a GP     | QICDSS                                                                                               |
| 10. Quality of community mental health services of patients with personality disorders  | Determine the balance of psychiatric outpatient and primary outpatient care depending on the profiles used <sup>5,55</sup>                    | Based on the associations found for the balance between primary and specialist mental health care and suicide rates <sup>2,46,60,61</sup> | Denominator: Individuals aged 15+ years with exclusively a GP or a psychiatric outpatient visit for personality disorder<br><br>Numerator: Number of individuals with exclusively a GP or psychiatric outpatient visits | Prevalence of individuals 15+ years who received a personality disorder diagnosis and used exclusively outpatient services by a GP       | QICDSS                                                                                               |
| 11. Adequate use of emergency room for mental health services                           | Determine the balance of utilization of emergency room (ER) for mental health reasons <sup>5,55</sup>                                         | Based on the associations found for the balance between primary and specialist mental health care and suicide rates <sup>46,60,61</sup>   | Denominator: Individuals aged 15+ years with a diagnosis of a mental health disorder<br><br>Numerator: Number of individuals with ER visits without being admitted                                                      | Prevalence of individuals 15+ years who received a diagnosis of mental health disorder with exclusively ER visits without being admitted | QICDSS                                                                                               |
| 12. Program expenditures for mental health services                                     | Determine the strength of the relationship between changes in suicide rates and expenditures for mental health (regional and provincial)      | Based on associations found between mental health budget and suicide rates <sup>21,23</sup>                                               | Refer to the Gouvernement du Québec <sup>43</sup>                                                                                                                                                                       | Dollars per capita spent on mental health programs (provincial and regional)                                                             | Annual financial reports from the Ministère de la santé et des services sociaux (MSSS) <sup>43</sup> |
| 13. Program expenditures for addiction services                                         | Determine the strength of the relationship between changes in suicide rates and expenditures for addiction services (regional and provincial) | Based on associations found between mental health budget and suicide rates <sup>21,23</sup>                                               | Refer to the Gouvernement du Québec <sup>43</sup>                                                                                                                                                                       | Dollars per capita spent on health programs for addiction services (provincial and regional)                                             | Annual financial reports from the MSSS <sup>43</sup>                                                 |

**Abbreviations:** CIHI, Canadian Institute for Health Information; ER, emergency room; GP, general practitioner; MSSS, Ministère de la santé et des services sociaux; QICDSS, Quebec Integrated Chronic Disease Surveillance System.

<sup>1</sup> Profile 1: psychiatric inpatient care; profile 2: hospital emergency room (ER); profile 3: psychiatric outpatient care; profile 4: general practitioner (GP) clinics; and profile 5: other medical specialist.



# BMJ Open

## A case-control study on predicting population risk of suicide using health administrative data: A research protocol

|                                 |                                                                                                                                                                                                                                                                                                                                                                                                                                                                                                                                                                                                                                                                                                                                                                                                                                                                                                                                                                                    |
|---------------------------------|------------------------------------------------------------------------------------------------------------------------------------------------------------------------------------------------------------------------------------------------------------------------------------------------------------------------------------------------------------------------------------------------------------------------------------------------------------------------------------------------------------------------------------------------------------------------------------------------------------------------------------------------------------------------------------------------------------------------------------------------------------------------------------------------------------------------------------------------------------------------------------------------------------------------------------------------------------------------------------|
| Journal:                        | <i>BMJ Open</i>                                                                                                                                                                                                                                                                                                                                                                                                                                                                                                                                                                                                                                                                                                                                                                                                                                                                                                                                                                    |
| Manuscript ID                   | bmjopen-2022-066423.R2                                                                                                                                                                                                                                                                                                                                                                                                                                                                                                                                                                                                                                                                                                                                                                                                                                                                                                                                                             |
| Article Type:                   | Protocol                                                                                                                                                                                                                                                                                                                                                                                                                                                                                                                                                                                                                                                                                                                                                                                                                                                                                                                                                                           |
| Date Submitted by the Author:   | 27-Jan-2023                                                                                                                                                                                                                                                                                                                                                                                                                                                                                                                                                                                                                                                                                                                                                                                                                                                                                                                                                                        |
| Complete List of Authors:       | Wang, JianLi; Dalhousie University, Department of Community Health and Epidemiology<br>Gholi Zadeh Kharrat, Fatemeh; Laval University, Department of Electrical Engineering and Computer Engineering<br>Pelletier, Jean-François; University of Montreal, Department of Psychiatry<br>Rochette, Louis ; Institut national de sante publique du Quebec<br>Pelletier, Eric; INSPQ<br>Lévesque, Pascale; Institut national de santé publique du Québec (INSPQ)<br>Massamba, Victoria; Institut national de santé publique du Québec (INSPQ)<br>Brousseau-Paradis, Camille; University of Montreal, Department of Psychiatry<br>Mohammed, Mada; Dalhousie University, Department of Community Health and Epidemiology<br>Gariépy, Geneviève; Public Health Agency of Canada; University of Montreal, Department of Social and Preventive Medicine<br>Gagné, Christian; Laval University, Electrical Engineering<br>Lesage, Alain ; Institut universitaire en sante mentale de Montreal |
| <b>Primary Subject Heading</b>: | Mental health                                                                                                                                                                                                                                                                                                                                                                                                                                                                                                                                                                                                                                                                                                                                                                                                                                                                                                                                                                      |
| Secondary Subject Heading:      | Public health                                                                                                                                                                                                                                                                                                                                                                                                                                                                                                                                                                                                                                                                                                                                                                                                                                                                                                                                                                      |
| Keywords:                       | Suicide & self-harm < PSYCHIATRY, PUBLIC HEALTH, PSYCHIATRY, HEALTH SERVICES ADMINISTRATION & MANAGEMENT                                                                                                                                                                                                                                                                                                                                                                                                                                                                                                                                                                                                                                                                                                                                                                                                                                                                           |
|                                 |                                                                                                                                                                                                                                                                                                                                                                                                                                                                                                                                                                                                                                                                                                                                                                                                                                                                                                                                                                                    |

SCHOLARONE™  
Manuscripts

## A case-control study on predicting population risk of suicide using health administrative data: A research protocol

JianLi Wang,<sup>1</sup> Fatemeh Gholi Zadeh Kharrat,<sup>2</sup> Jean-François Pelletier,<sup>3</sup> Louis Rochette,<sup>4</sup> Eric Pelletier,<sup>4</sup> Pascale Lévesque,<sup>4</sup> Victoria Massamba,<sup>4</sup> Camille Brousseau-Paradis,<sup>3</sup> Mada Mohammed,<sup>1</sup> Geneviève Gariépy,<sup>5,6,7</sup> Christian Gagne,<sup>2</sup> Alain Lesage<sup>3,7</sup>

1. Department of Community Health and Epidemiology, Faculty of Medicine, Dalhousie University.
2. Department of Electrical Engineering and Computer Engineering, Laval University.
3. Department of Psychiatry, University of Montreal, QC, Canada.
4. Institut national de santé publique du Québec (INSPQ), Quebec City, Quebec, Canada.
5. Centre for Surveillance and Applied Research, Health Promotion and Chronic Disease Prevention Branch, Public Health Agency of Canada, Ottawa, Canada
6. Department of Social and Preventive Medicine, School of Public Health, University of Montreal, Montreal, Canada
7. Research Center, Institut universitaire de santé mentale de Montréal. Montreal, Canada.

Corresponding author:

JianLi Wang

5790 University Ave.

Department of Community Health and Epidemiology

Faculty of Medicine, Dalhousie University

[Jianli.wang@dal.ca](mailto:Jianli.wang@dal.ca)

## Abstract

**Introduction:** Suicide has a complex etiology and is a result of the interaction among the risk and protective factors at the individual, healthcare system, and population levels. Therefore, policy and decision makers and mental health service planners can play an important role in suicide prevention. Although a number of suicide risk predictive tools have been developed, these tools were designed to be used by clinicians for assessing individual risk of suicide. There have been no risk predictive models to be used by policy and decision makers for predicting population risk of suicide at the national, provincial and regional levels. This paper aimed to describe the rationale and methodology for developing risk predictive models for population risk of suicide.

**Methods and analysis:** A case-control study design will be used to develop sex-specific risk predictive models for population risk of suicide, using statistical regression and machine learning techniques. Routinely collected health administrative data in Quebec, Canada, and community level social deprivation and marginalization data will be used. The developed models will be transformed into the models that can be readily used by policy and decision makers. Two rounds of qualitative interviews with end-users and other stakeholders were proposed to understand their views about the developed models and potential systematic, social and ethical issues for implementation; the first round of qualitative interviews have been completed. We included 9440 suicide cases (7234 males and 2206 females) and 661,780 controls for model development. Three hundred and forty seven variables at individual, healthcare system and community levels have been identified and will be included LASSO regression for feature selection.

**Ethics and dissemination:** This study is approved by the Health Research Ethics Committee of Dalhousie University, Canada. This study takes an integrated knowledge translation approach, involving knowledge users from the beginning of the process.

**Strengths and limitations of this study:**

- This study will use routinely collected health administrative data, which are readily accessible to policy and decision makers.
- The candidate predictors include variables at individual, healthcare system and community levels, which reflect the complex etiology of suicide.
- The methodology of model development and validation needs to be improved.
- Some individuals in the control group might have suicide behaviors, which could not be ascertained by health administrative data.
- Important factors such as education, employment and income are not routinely collected by health administrative databases, which is a limitation of this study.

## Introduction

Suicide is a major international public health problem. Each year, over 4,500 Canadians take their own life,(1) and more than 700,000 people die because of suicide worldwide,(2) imposing enormous impacts on families, communities and societies. As such, suicide prevention has been a top priority of many countries.

Suicide has a complex etiology and is a result of the interaction among the risk and protective factors at the individual, healthcare system, and population levels.(3–10) Therefore, policy and decision makers and mental health service planners can play an important role in suicide prevention. To facilitate suicide prevention planning, mechanisms should be in place that enable policy and decision makers to make informed decisions and mobilize resources to high-risk populations at the right places, before tragic events occur. This vision requires us to shift the paradigm from predicting individual risk to predicting population risk of suicide. However, the existing suicide risk assessment/predictive tools are not suitable for predicting population risk. Most of the existing risk assessment/risk predictive tools for suicide were designed to be used by clinicians; they were not designed for policy and decision makers.(11) Clinicians often use these tools to determine if individual patients are at high risk of suicide presently or in short term (e.g., next week). Whereas policy and decision makers are more concerned about the rate of suicide at the community level (e.g., health regions, provinces/states) in the medium or long term (e.g., in the next 5 or 10 years), driven partly by budgetary decisions that are often made on a yearly basis. Clinicians and policy/decision makers may have different emphases on risk predictive tools as well. For clinicians, an ideal suicide risk predictive tool should have high discriminative power (e.g., a large C statistics), high sensitivity, specificity and positive predictive value. For policy and decision makers, a tool with excellent calibration (i.e., how closely the predicted risk agrees with actual risk in the population) is more useful. To facilitate policy development in suicide prevention at the population level, risk predictive models specifically designed for policy and decision makers are needed.

Ideally, risk predictive models for population risk of suicide are based on large data from the target population. For example, Gradus and colleagues developed sex-specific machine learning algorithms for suicide using data from eight Danish national health and social registries which cover more than 90% of the Danish population.(12) Kessler et al.'s machine learning (ML) algorithms targeted US Army soldiers who were hospitalized.(13) Accordingly, these risk predictive algorithms may potentially be used for forecasting the risk of suicide in Danish general population and in the US Army population, respectively. Furthermore, predictive models for population risk may use not only individual data, but also health system level (e.g., quality of mental health care, mental health budget), and community level data (e.g., unemployment rate and social deprivation levels in the community). For instance, Marks and colleagues developed a predictive model for identifying counties at high risk of overdose mortality, which included county-level education, poverty rate, unemployment rate, overdose gravity, and other county-level indicators, among the 3106 counties in the United States.(14) Given the complex etiology of suicide, predicting population risk of suicide may benefit greatly from the integration of data at the individual, health system and community levels.

1  
2  
3  
4 We undertook a project to develop and validate sex-specific risk predictive models to be used  
5 by policy and decision makers to forecast population risk of suicide at the health region level,  
6 using routinely collected health administrative data, and to identify the barriers and facilitators  
7 to implementation and explore the ethical and privacy issues of the prediction program. In this  
8 manuscript, we aimed to describe the methodology of the project, to inform methodological  
9 discussions and suicide prevention strategies.  
10  
11

## 12 13 **Methods**

14  
15 This project encompasses the components of quantitative and qualitative investigations and an  
16 integrated knowledge translation (IKT). IKT is a model of research co-production, whereby  
17 knowledge users are integrated throughout the research process and who can use the research  
18 recommendations in practice or policy.<sup>(15)</sup> IKT approaches are used to improve the relevance  
19 and impact of research. The quantitative research involved developing and validating risk  
20 prediction models for suicide using advanced ML and visualization methods. The qualitative  
21 research is to understand the potential implementation, social, ethics and legal issues  
22 associated with the risk prediction program. In line with IKT principles, we involved policy and  
23 decision makers at the provincial and national levels, and people with lived experience of  
24 suicidality from the beginning of the project. The methodology of each component is described  
25 below.  
26  
27  
28  
29

### 30 ***Model development and validation***

31 ***Target population:*** The general population residing in the province of Quebec, Canada. The  
32 province had a population of over 8.6 million people in 2021, and about 95% of the population  
33 reported being able to conduct a conversation in French. In Quebec, health services are  
34 planned and delivered through 18 health regions, 22 integrated health and social services  
35 centres, and 166 Centres locaux de santé Communautaire (CLSCs). Budgetary decisions are  
36 made at the levels of province and health regions/integrated health and social services centres.  
37  
38  
39

40 ***Data sources:*** We will develop the prediction tools by linking the suicide database, the Ministry  
41 of Health and Social Services (MSSS) public financial reports (Contour financier - Publications du  
42 ministère de la Santé et des Services sociaux (gouv.qc.ca) which include the five health  
43 administrative databases below, and the Canadian Urban Environmental Health Research  
44 (CANUE) data. The suicide database gathers individual-level data annually based on residents  
45 health insurance number from five administrative databases: the vital statistics death database,  
46 the physician claims database, the hospital discharge database, the Insured Person Registration  
47 File and the public drug plan. The data of these databases (e.g., billing and service procedures  
48 codes, service dates) are routinely submitted by clinics and hospitals for billing and  
49 administration purposes; no self-reported data were collected from patients. These databases  
50 cover up to 98% of the population in Quebec and contain data for over 20,000 death by suicide  
51 cases occurred since 1996. Death by suicide cases were those ascertained by Quebec's Coroner  
52 office after investigation. The decision is registered in the Quebec vital statistics database. The  
53 latter is linked with other health administrative databases of the Quebec Integrated Chronic  
54  
55  
56  
57

1  
2  
3 Disease Surveillance System (QICDSS) managed by the Quebec's Public Health Agency.(16) With  
4 the suicide database and other linkable Ministry financial databases, individual (e.g., sex, age),  
5 program (e.g., hospitalization, emergency department visits), and system (e.g., mental health  
6 and addiction budgets) level indicators can be identified.(16)  
7  
8

9 CANUE is a Canadian consortium aiming to build a unique repository of standardized metrics of  
10 urban, sub-urban, and rural characteristics, as well as the tools used to produce them  
11 ([www.canue.ca](http://www.canue.ca)). The CANUE data contain indicators for unemployment, social deprivation,  
12 access to health services and built environment at the community level, and can be linked with  
13 health administrative data by postal codes. The CANUE is open and free for research projects.  
14 The data linkage was performed at the Quebec Institute of Public Health (INSPQ) where the  
15 suicide data are kept. Linking the databases provides an unprecedented sample size and the  
16 capability of examining individual, neighborhood, programmatic and systemic indicators of  
17 population suicide risk.  
18  
19  
20

21 Because this study used existing de-identified health administrative data, informed consent  
22 from individual patients was waived. This study was approved by the Research Ethics Board of  
23 Dalhousie University.  
24  
25

26 *Study design:* Because the base rate of suicide in the population is low, we proposed to use a  
27 case-control study design to develop sex-specific suicide risk predictive algorithms, using both  
28 logistic regression modeling and machine learning (ML) techniques. We selected all death by  
29 suicide cases that occurred from January 1<sup>st</sup> 2002 to December 31<sup>st</sup> 2010.(17) The control group  
30 was a 1% random sample of living individuals in each year between January 1<sup>st</sup>, 2002 and  
31 December 31<sup>st</sup>, 2010 from the Quebec physician claim database. Controls are not allowed to be  
32 selected more than once across years. None of those in the control group died of suicide during  
33 this period. The cases and controls were not matched to allow for maximum variability in  
34 predictors.  
35  
36  
37

38 *Predictors:* Individual, programmatic, systemic and community factors (see Appendix I)  
39 happened five years prior to the suicide events will be used as candidate predictors to develop  
40 the risk predictive algorithms. For example, we extracted the data about the diagnosis of major  
41 depression (an individual level factor) in the past 6, 12, 24, 48 and 60 months, as 5 separate  
42 candidate predictors. Similarly, we extracted mental health and addiction budget of each health  
43 region (a systemic level factor) in the past 5 years as candidate predictors. The QICDSS(18)  
44 provided all the variables drawn from health administrative databases. It covers 98% of the  
45 Quebec's population since 1996. The security and continuous quality and maintenance are the  
46 responsibility of the Quebec Public health Institute (INSPQ). Information is for administrative  
47 (i.e. age, hospital or outpatient contact dates) and clinician reporting (i.e. diagnoses) purposes.  
48 Validation of QICDSS physical diagnoses has been achieved by chart reviews(18) and by  
49 outcomes for QICDSS psychiatric diagnoses.(19,20) The QICDSS has been exploited over the  
50 past decade by a network of INSPQ officers and academic researchers, many are co-authors of  
51 publications on the characteristics of patients receiving rare psychiatric interventions,(21) and  
52 on personality disorders, schizophrenia and substance use disorders in relation to mortality,  
53  
54  
55  
56  
57

1  
2  
3 including suicide.(22,23) The quality of the data is also reflected by the minimal missing data  
4 associated with the variables, which ranges from 0.87% and 4.12% of the variables in the  
5 databases.  
6

7 The initial selection of candidate predictors is determined by content knowledge (i.e.,  
8 known relationships between suicide or suicide behaviors and individual and local area level  
9 variables), feasibility of routine data collection, clinical utility and policy relevance through team  
10 meetings. Therefore, the pre-determination of candidate predictors was a joint effort between  
11 the team members, collaborators, health policy and decision makers and other stakeholders,  
12 with the expertise of clinical psychiatry, psychiatric epidemiology, mental health services  
13 research, health administrative data, computer science, and mental health policy.  
14

15 For the objective of this study, we will use both statistical (e.g., logistic regression  
16 modeling) and machine learning (ML) approaches to develop the risk prediction models so that  
17 we may compare which approach performs better in predicting population suicide risk and is  
18 more feasible to implement. ML can produce complex estimations by searching data for  
19 relevant pieces of information and their complex interactions. Therefore, ML is best suited to  
20 tackle the combined challenges of high dimensional data analysis associated with risk  
21 prediction for suicide. Some predictors that may change over time (e.g., diagnoses,  
22 medications, service use, etc.) will be dummy-coded to create time-varying predictors (i.e.,  
23 intervals of 0-3,0-6, 0-12, 0-24, 0-36,0-48, and 0-60 months before the first day of the suicide  
24 month). Because we included all suicide cases and a sample of controls, the proportion of  
25 suicide in the sample is different from that in the general population. This is a limitation of case-  
26 control study design which produces a biased sample because the proportion of cases in the  
27 sample is not the same as the population of interest.(24,25) One method for addressing this  
28 limitation when developing predictive models using case-control data is weighting.(25–28)  
29 Therefore, in logistic regression modeling, sampling weights (inversed probability of being  
30 selected) were assigned to the controls, while the weight of 1 was assigned to the cases, to  
31 ensure the models are applicable to the whole population.  
32  
33  
34  
35  
36

### 37 *Model development – Machine learning (ML).*

38 ML is a part of Artificial intelligence (AI) that aims to construct systems that automatically  
39 improve through experience using advanced statistical and probabilistic techniques. ML has  
40 provided significant benefits to a range of fields. Recent research has shown a range of  
41 advantages of ML that can assist in detecting, diagnosing, predicting suicide, and treating  
42 mental health problems.(29,30) ML methods are divided into categories, i.e., supervised, semi-  
43 supervised, unsupervised, and reinforcement.  
44  
45

46 Imbalanced classes are a common problem in ML classification, where each class has a  
47 disproportionate ratio of observations. To predict the population risk of suicide, Dataset will be  
48 imbalanced because of rare cases of suicide as compared with a control group. To address the  
49 imbalanced Dataset, we will over-sample the minority class. We will "artificially" duplicate  
50 samples from the minority class to over-sample the minority class to correct imbalanced  
51 datasets, even though doing so does not provide the model with any new data. In the  
52 literature, this method was known as the Synthetic Minority Over-sampling Technique  
53 (SMOTE). Then, we will develop supervised learning models such as logistic regression, Random  
54 Forest, XGBoost, and Multilayer perceptron with an optimized model architecture. These  
55  
56  
57

1  
2  
3 models' predictive capacity will be assessed by generating the receiver operating characteristic  
4 (ROC) curves calculating its AUC and various operating characteristics, including sensitivity,  
5 specificity, and positive predictive value for a variety of thresholds.  
6

7 Interpretability is essential when we deal with healthcare data. It is significant because it  
8 is necessary to understand the casualty of learned representations for decision support also  
9 helps to assess whether the model is considering the right features while making a specific  
10 prediction. Feature-based model explainability technique, such as Shapley Additive  
11 Explanations (SHAP), was derived from game theory; each player decides to contribute to a  
12 coalition of players to produce a total value that will be superior to the sum of their individual  
13 values. SHAP relies on the Shapley value of both local and global explanations. Shapley's values  
14 are model-agnostic, and the marginal contribution of each feature can be calculated by using  
15 the input data and the predictions.(31,32) SHAP will use with the global explanation of how  
16 much the input features contribute to a model's output.  
17  
18  
19

### 20 Model development – logistic regression.

21

22  
23 As the first step of model development, we will include all pre-selected variables in penalized  
24 least absolute shrinkage and selection operator (LASSO) regression. The LASSO penalization  
25 factor selects important predictors by shrinking coefficients for weaker predictors toward zero,  
26 excluding predictors with estimated zero coefficients from the final sparse prediction model.  
27 We will perform a correlation analysis among variables selected by the LASSO regression, and  
28 identify variables that are strongly correlated (e.g.,  $\gamma \geq 0.60$ ). Correlated variables will be  
29 discussed by team members, and the variables that have better policy implication and clinical  
30 utility will be kept and become the candidate predictors for model development.  
31  
32

33  
34 We will use logistic regression to develop the sex-specific statistical models. After LASSO, there  
35 may still be a large number of candidate predictors. Backward selection method will be used to  
36 eliminate unproductive variables and to identify the model with the best calibration and  
37 discrimination. The decisions of model selection will be initially based on the changes in the  
38 values of Akaike Information Criterion (AIC) and Bayesian Information Criterion (BIC).(33) Since  
39 BIC penalizes for the complexity of the model more than AIC, selection with BIC will generally  
40 lead to smaller models than selection with AIC.(33) Once a model is developed, prediction  
41 accuracy will be assessed by the discrimination and calibration of the model. Discrimination is  
42 the ability of a prediction model to separate those who experienced the outcome events from  
43 those who did not. We will quantify this by calculating the C statistic, analogous to the area  
44 under a receiver operating characteristic curve. Calibration measures how closely predicted  
45 outcomes agree with actual outcomes. For this, we will use D'Agostino's version of the Hosmer-  
46 Lemeshow Chi square statistic. Discrimination and calibration compete with each other. Given  
47 that the program will be used to forecast population risk of suicide, we will prioritize calibration  
48 over discrimination. Stakeholders from different perspectives and scientific backgrounds will  
49 meet to determine the content and performance of the risk prediction models developed by  
50 statistical and ML techniques, the appropriate formats of data visualization that are acceptable  
51 to policy and decision makers, and the feasibility of implementation, which will in turn inform  
52 the revision of the models.  
53  
54  
55  
56  
57



1  
2  
3 The second step of the model development is to estimate the synthetic rates, consisting  
4 of two stages. First, for each predictor, the proportions of individuals within each category of  
5 that predictor in the initial modeling will be computed, separately by regions. For instance, if  
6 hospitalization due to suicide attempt in the past 5 years is a predictor in the model, the  
7 proportion of individuals with this attribute in a specific health region is calculated. If age is a  
8 continuous variable in the model, the mean age of the population in a health region is  
9 estimated. A syntax program will then be prepared to apply the regression coefficients to the  
10 corresponding proportions and means in the data set, and to calculate the logit estimates for  
11 each of health regions. The resulting logit values for each of the health region will then be  
12 converted into probabilities, giving the estimated risk of suicide in the health region. The  
13 region's population counts from Statistics Canada Census data or the provincial health  
14 administrative database multiplied by the estimated risk will yield the estimated number of  
15 suicide in this health region.  
16  
17  
18

19 The fitted logistic regression model described above estimates the proportion of suicide  
20 in the population at a given moment of time as a function of its risk factors in the past. This  
21 model is fundamentally etiologic, where the natural reference-point is the moment of the  
22 outcome's occurrence, corresponding to the zero time on the etiologic time scale. However,  
23 assessment of population risk of suicide over a particular span of time in the future involves a  
24 prognostic outlook, where the natural reference-point is the time of prognostication,  
25 corresponding to the zero time on the prognostic time scale. Predictive models for individual  
26 risk are often developed using a cohort/closed study-population and express the risk of future  
27 occurrence of the outcome as a function of current risk factors, and involves consideration of  
28 the values of the risk factors at issue at the prognostic time zero only. Whereas population risk  
29 models are applied in the context of a dynamic/open population and the estimated risk is a  
30 function of risk factors not only at the prognostic time-zero but also throughout the time span  
31 at issue. For example, the risk of suicide in the next 5 years in a health region may not only  
32 depend on the proportions of people with major depression and of hospitalization due to  
33 suicide attempt in the past, but also on whether there will be a reduction or increase in these  
34 parameters over the next 5 years, if so in which year. Thus, the population risk of suicide may  
35 be projected using the developed model to each future year over a pre-defined time interval.  
36 The cumulative incidence of suicide (CI<sub>0 to t</sub>) from time T = 0 to T = t can be estimated as a  
37 function of time- and profile specific risk operating over that time interval:(28)  
38  
39  
40  
41  
42  
43

$$44 \quad CI_{0 \text{ to } t} = 1 - \exp \left[ - \int_0^t (ID_u) du \right]$$

45  
46  
47  
48  
49 The estimated cumulative risk represents the estimated risk of suicide of a health region over  
50 the time period at issue conditionally on the health region's risk profile.  
51

52 Validation:  
53  
54  
55  
56  
57

1  
2  
3 For model validation, we will use the suicide data from January 1<sup>st</sup>, 2011 to December 31<sup>st</sup>,  
4 2019. We will first calculate the yearly, 5-year and 10-year incidence of suicide death at the  
5 provincial and health regional levels in males and females (i.e., observed risk). We will apply the  
6 developed synthetic models in the validation data to estimate the yearly, 5-year and 10-year  
7 incidence of suicide death at the provincial and health regional levels in males and females (i.e.,  
8 predicted risk). We will visually compare and calculate the differences between the predicted  
9 and observed risks; smaller differences indicate better calibration with the data and model  
10 accuracy. We will use four indicators for assessing model performance: mean average error  
11 (MAE), root mean square error (RMSE), Spearman's  $r$ , and proportion of correct identification  
12 of high risk regions.(14) The MAE is the average magnitude of the difference between the  
13 predicted and observed suicide death rate for each health region. The RMSE is the square root  
14 of the average magnitude of the difference squared, therefore is similar to MAE but penalises  
15 prediction errors with greater magnitude. More accurate predictions will result in smaller MAE  
16 and RMSE. Spearman's  $r$  compares the predicted ranking of health regions by suicide death rate  
17 compared with the actual observed rankings; results closer to 1 indicate that the model was  
18 more effective at rank-ordering regions based on suicide death rate. To assess the extent to  
19 which high risk regions are correctly identified, we will first disaggregate the predicted and  
20 observed suicide rates into quartile groups and categorised all health regions into their  
21 corresponding quartiles for both predicted and observed suicide rates. The proportion of health  
22 regions observed in the top quartile of observed suicide death rates that were rightly predicted  
23 to be in the top quartile will be calculated.

### 30 **Qualitative study**

31 The objective of the qualitative study is to investigate the end-users' views about predicting  
32 population risk of suicide, and the potential social, legal, ethical, and privacy issues and  
33 mitigation strategies for implementing such a predictive system. Using snowballing techniques,  
34 we have invited policy and decision makers at the federal and provincial levels, mental health  
35 professionals, individuals who have extensive experience in working with policy and decision  
36 makers and who have expertise in suicide prevention, social and health policy, as well as health  
37 administrative data, people with lived experience, and advocates for families bereaved by  
38 suicide. The qualitative study consists of two rounds of interviews. The first round of interviews  
39 were carried out after the general team meeting held in July 2021, at which the study design  
40 was finalized. The second round of interviews will be organized once the predictive models are  
41 developed. The first round interviews were held through zoom meetings, and follow a series of  
42 semi-structured interview questions related to the objectives (see supplementary file#1).  
43 Qualitative data collected during the focus groups and qualitative interviews are audio  
44 recorded, transcribed, and analyzed with the support of QDA Miner (Provalis).(34) The second  
45 round of interviews will be conducted once the prototype models are developed and presented  
46 at the second general team meeting which is to be held in late 2022. We will perform an  
47 inductive thematic analysis of the focus group and individual interview material, which will be  
48 fed by answers to the open questions regarding potential (i) perceptions about the developed  
49 prediction models, (ii) social issues, (iii) legal issues, (iv) ethical and privacy issues, and (v)  
50 mitigation strategies for implementing such a system. Transcripts will be coded in order to  
51 demarcate segments within each of them. We will look for words or short phrases that

1  
2  
3 demonstrate how the associated data segments inform our research objectives. Detailed  
4 results from the qualitative analysis of this material will be presented in a separate paper.  
5  
6

### 7 **Patient and Public Involvement**

8  
9 Engagement with relevant stakeholders (e.g., policy/decision makers, and people with lived  
10 experience) through IKT is critical for developing equitable risk predictive algorithms and for  
11 maximizing the potential for future implementation. For this project, we have identified and  
12 engaged policy/decision makers from the Public Health Agency of Canada and from the INSPQ,  
13 as well as 8 people with lived experience. The representatives of INSPQ (EP, PL, VM, LR) were  
14 involved in study conceptualization and grant application. PL has been facilitating data  
15 extraction, participated in the bi-weekly team meetings. As described above, we have engaged  
16 people with lived experience through the qualitative interviews. The next round of qualitative  
17 interviews will be held after the prototype of the risk predictive models are developed to have a  
18 better understanding about privacy, ethics and implementation issues.  
19  
20  
21  
22

### 23 **Ethics and dissemination**

24  
25 This study will use routinely collected health administrative data. The analysis of secondary de-  
26 identified data at the INSPQ where the data are kept will not incur physical and psychological  
27 harms. The results of the study will be vetted by analysts at the INSPQ to ensure no privacy and  
28 confidentiality will be breached. The data used for this study will be kept at INSPQ for 15 years.  
29 The results will be presented in peer-reviewed journals, at academic conferences, and shared  
30 with knowledge users who were engaged from the beginning.  
31  
32  
33

34 Through this study, we aimed to develop risk prediction models to be used by policy and  
35 decision makers to forecast population risk of suicide at the provincial and health region levels,  
36 using routinely collected health administrative data and other publicly available area-level data.  
37 For example, policy and decision makers may use the models to project the proportion and  
38 number of suicide deaths in specific health regions/communities over the next 5 years, and  
39 decide how resources and community level interventions may be mobilized to the high risk  
40 regions/communities. Furthermore, the models can inform policy and decision makers about  
41 the potential impacts of these community level intervention on suicide prevention. The  
42 potential utility of such predictive tools has been attested by the active involvement by the  
43 policy and decision makers at the federal and provincial levels and people with lived  
44 experience. Nevertheless, predicting population risk of suicide is new and has not been well  
45 studied. There are a number of methodological and implementation challenges to be  
46 addressed.  
47  
48  
49  
50

51 Routinely collected health administrative data and population health survey data represent a  
52 unique opportunity for population health projection because it covers a majority of the general  
53 population in catchment areas, and the data can be readily accessed by policy and decision  
54 makers. Many risk predictive models have been developed for physical and mental health  
55 problems in the general population. For example, individual data from population health  
56  
57  
58  
59  
60

1  
2  
3 surveys and health administrative databases have been used to develop risk predictive models  
4 for diabetes,(35) heart disease,(36) and major depression.(37,38) These models may be used to  
5 identify high risk individuals in the community; they can also be used to forecast the population  
6 risk in the future. However, few models have integrated individual, healthcare system, and  
7 community level predictors in the same model. In this study, we proposed to include data from  
8 these different levels in model development, and convert the models into synthetic estimation  
9 models. There may be different approaches for integrating data from different levels for  
10 population risk prediction. Future studies are needed to explore the best method for data  
11 integration.  
12  
13  
14

15 The performance of a risk predictive model is commonly assessed by indicators of model  
16 discrimination and calibration.(39) Whereas model discrimination is critical for individual risk  
17 predictive models, policy and decision makers' focus is on the whole population rather than  
18 individuals. Therefore, model calibration plays a more important role in the performance of a  
19 population risk model. We proposed four indicators for assessing model performance.  
20 However, it is not clear how much error (the difference between predicted and observed risks)  
21 policy and decision makers may tolerate for population risk prediction, how they perceive the  
22 importance of model discrimination, whether other indicators exist for assessing population  
23 risk prediction models. We will explore these aspects through our qualitative study, and also  
24 encourage others to consider these in future studies. Similarly, we welcome discussions and  
25 debates about the methods for validating population risk predictive models. An individual risk  
26 predictive model is often developed using longitudinal cohort/closed population data and  
27 validated in a different but related cohort/closed population. This poses challenges for  
28 population risk predictive models because the population in a community/health region is open  
29 and dynamic. Appropriate methods for model validation and acceptability need to be  
30 developed and agreed by the research community and policy and decision makers.  
31  
32  
33  
34  
35

36 This study relied on routinely collected health administrative data for model development and  
37 validation, rather than collecting primary data. Therefore, we have a little information about  
38 suicide behaviors among the individuals in the control group, which are strongly associated  
39 with suicide deaths. In the model development, we included hospitalization and emergency  
40 department visits due to suicide attempt, which may reduce the bias related to the lack of  
41 information about suicide behaviors. Nevertheless, this is a limitation of routinely collected  
42 health administrative data.  
43  
44  
45

46 Despite the challenges for developing population risk predictive model for suicide, research is  
47 urgently needed to address this important population health issue. This study represents one of  
48 the early steps in building such risk predictive models and methodology development, as part  
49 of the collective efforts for moving the field forward.  
50  
51  
52  
53  
54  
55  
56  
57  
58  
59  
60

**Authors' contribution:**

JLW drafted the manuscript. JLW, FGZK, J-FP, LR, EP, PL, GG, CG, and AL were involved in study design, conceptualization and funding application. JLW, FGZK, J-FP, LR, EP, PL, VM, CB-P, MM, GG, CG, and AL were involved in manuscript review, discussion, revision, and final approval.

**Funding statement:**

This study is supported by a New Frontiers for Research Funds grant (2019-00471) from Tri-Agency Institutional Programs Secretariat, Government of Canada, and by a Tier I Canada Research Chair award to JLW. The funders play no role in design and operation of this study.

**Competing interests:** none

## References

1. Statistics Canada. Deaths and age-specific mortality rates, by selected grouped causes [Internet]. 2019. Available from: <https://www150.statcan.gc.ca/t1/tbl1/en/tv.action?pid=1310039201>
2. World Health Organization. Suicide [Internet]. [cited 2022 May 15]. Available from: <https://www.who.int/news-room/fact-sheets/detail/suicide>
3. Mental Health Commission of Canada. RESEARCH ON SUICIDE AND ITS PREVENTION: What the current evidence reveals and topics for future research [Internet]. Ottawa, Canada; 2018. Available from: [www.mentalhealthcommission.ca](http://www.mentalhealthcommission.ca)
4. Tondo L, Albert MJ, Baldessarini RJ, Bini L. Suicide Rates in Relation to Health Care Access in the United States: An Ecological Study. Vol. 67, *J Clin Psychiatry*. 2006.
5. Lise Thibodeau, Elham Rahme, James Lachaud, Éric Pelletier, Louis Rochette, Ann John, Anne Reneflot KL, Lesage A. Individual, programmatic and systemic indicators of the quality of mental health care using a large health administrative database: an avenue for preventing suicide mortality. *Health Promotion and Chronic Disease Prevention in Canada*. 2018;38(7/8):295–304.
6. Mortier P, Cuijpers P, Kiekens G, Auerbach RP, Demyttenaere K, Green JG, et al. The prevalence of suicidal thoughts and behaviours among college students: A meta-analysis. Vol. 48, *Psychological Medicine*. 2018.
7. Nock MK, Borges G, Bromet EJ, Cha CB, Kessler RC, Lee S. Suicide and suicidal behavior. Vol. 30, *Epidemiologic Reviews*. 2008.
8. Goldman-Mellor SJ, Caspi A, Harrington HL, Hogan S, Nada-Raja S, Poulton R, et al. Suicide attempt in young people a signal for long-term health care and social needs. *JAMA Psychiatry*. 2014;71(2).
9. Crawford MJ, Nur U, McKenzie K, Tyrer P. Suicidal ideation and suicide attempts among ethnic minority groups in England: Results of a national household survey. *Psychol Med*. 2005;35(9).
10. Bernal M, Haro JM, Bernert S, Brugha T, de Graaf R, Bruffaerts R, et al. Risk factors for suicidality in Europe: Results from the ESEMED study. *J Affect Disord*. 2007;101(1–3).
11. Bolton JM, Gunnell D, Turecki G. Suicide risk assessment and intervention in people with mental illness. Vol. 351, *BMJ (Online)*. BMJ Publishing Group; 2015.
12. Gradus JL, Rosellini AJ, Horváth-Puhó E, Street AE, Galatzer-Levy I, Jiang T, et al. Prediction of Sex-Specific Suicide Risk Using Machine Learning and Single-Payer Health Care Registry Data from Denmark. *JAMA Psychiatry*. 2020;77(1).
13. Kessler RC, Warner LTCCH, Ivany LTCC, Petukhova M v, Rose S, Bromet EJ, et al. Predicting U.S. Army suicides after hospitalizations with psychiatric diagnoses in the Army Study to Assess Risk and Resilience Resilience in Service members ( Army STARRS ). *JAMA Psychiatry*. 2015;72(1):49–57.
14. Marks C, Abramovitz D, Donnelly CA, Carrasco-Escobar G, Carrasco-Hernández R, Ciccarone D, et al. Identifying counties at risk of high overdose mortality burden during

- 1  
2  
3 the emerging fentanyl epidemic in the USA: a predictive statistical modelling study.  
4 Lancet Public Health. 2021;6(10).
- 5  
6 15. Boland L, Kothari A, McCutcheon C, Graham ID. Building an integrated knowledge  
7 translation (IKT) evidence base: Colloquium proceedings and research direction. Vol. 18,  
8 Health Research Policy and Systems. 2020.
- 9  
10 16. Thibodeau L, Rahme E, Lachaud J, Rochette L, John A, Reneflot A, et al. Individual ,  
11 programmatic and systemic indicators of the quality of mental health care using a large  
12 health administrative database : an avenue for preventing suicide mortality.  
13 2018;38(7):295–304.
- 14  
15 17. Vasiliadis HM, Lesage A, Latimer E, Seguin M. Implementing suicide prevention  
16 programs: Costs and potential life years saved in Canada. Journal of Mental Health Policy  
17 and Economics. 2015;18(3):147–55.
- 18  
19 18. Blais C, Jean S, Sirois C, Rochette L, Plante C, Larocque I, et al. Quebec integrated chronic  
20 disease surveillance system (QICDSS), an innovative approach. Chronic Dis Inj Can.  
21 2014;34(4).
- 22  
23 19. Lesage A, Rochette L, Émond V, Pelletier É, St-Laurent D, Diallo FB, et al. A surveillance  
24 system to monitor excess mortality of people with mental illness in Canada. Canadian  
25 Journal of Psychiatry. 2015;60(12).
- 26  
27 20. Diallo FB, Pelletier É, Vasiliadis HM, Rochette L, Vincent A, Palardy S, et al. Morbidities  
28 and mortality of diagnosed attention deficit hyperactivity disorder (ADHD) over the  
29 youth lifespan: A population-based retrospective cohort study. Int J Methods Psychiatr  
30 Res. 2022;31(1).
- 31  
32 21. Lafrenière S, Gholi-Zadeh-Kharrat F, Sirois C, Massamba V, Rochette L, Brousseau-Paradis  
33 C, et al. The 5-year longitudinal diagnostic profile and health services utilization of  
34 patients treated with electroconvulsive therapy in Quebec: a population-based study.  
35 Soc Psychiatry Psychiatr Epidemiol. 2022 Sep 26;
- 36  
37 22. Huỳnh C, Kisely S, Rochette L, Pelletier É, Jutras-Aswad D, Larocque A, et al. Using  
38 administrative health data to estimate prevalence and mortality rates of alcohol and  
39 other substance-related disorders for surveillance purposes. Drug Alcohol Rev.  
40 2021;40(4).
- 41  
42 23. Cailhol L, Pelletier É, Rochette L, Laporte L, David P, Villeneuve É, et al. Prevalence,  
43 Mortality, and Health Care Use among Patients with Cluster B Personality Disorders  
44 Clinically Diagnosed in Quebec: A Provincial Cohort Study, 2001-2012. Canadian Journal  
45 of Psychiatry. 2017;62(5).
- 46  
47 24. Mantel N, Haenszel W. Statistical aspects of the analysis of data from retrospective  
48 studies of disease. J Natl Cancer Inst. 1959;22(4).
- 49  
50 25. Rose S, Laan M van der. A Note on Risk Prediction for Case-Control Studies. [Preprint].  
51 2008;
- 52  
53 26. van der Laan MJ. Estimation based on case-control designs with known prevalence  
54 probability. International Journal of Biostatistics. 2008;4(1).
- 55  
56 27. Ten K, Ewout H, Steyerberg W. Methods for individualized assessment of absolute risk in  
57 case- control studies should be weighted carefully. Eur J Epidemiol. 2016;31(11):1067–8.
- 58  
59  
60

- 1
- 2
- 3
- 4 28. Karp I, Sylvestre MP, Abrahamowicz M, Leffondré K, Siemiatycki J. Bridging the etiologic
- 5 and prognostic outlooks in individualized assessment of absolute risk of an illness:
- 6 Application in lung cancer. *Eur J Epidemiol*. 2016 Nov 1;31(11):1091–9.
- 7 29. Shatte ABR, Hutchinson DM, Teague SJ. Machine learning in mental health: A scoping
- 8 review of methods and applications. Vol. 49, *Psychological Medicine*. 2019.
- 9 30. McHugh CM, Large MM. Can machine-learning methods really help predict suicide? Vol.
- 10 33, *Current opinion in psychiatry*. 2020.
- 11 31. Bowen D, Ungar L. Generalized SHAP: Generating multiple types of explanations in
- 12 machine learning. *ArXiv*. 2020 Jun 12;
- 13 32. Sundararajan M, Najmi A. The many Shapley values for model explanation. *ArXiv*. 2019
- 14 Aug 22;
- 15 33. Vrieze SI. Model selection and psychological theory: A discussion of the differences
- 16 between the Akaike information criterion (AIC) and the Bayesian information criterion
- 17 (BIC). *Psychol Methods*. 2012;17(2):228–243.
- 18 34. Rivas C, Tkacz D, Antao L, Mentzakis E, Gordon M, Anstee S, et al. Automated analysis of
- 19 free-text comments and dashboard representations in patient experience surveys: a
- 20 multimethod co-design study. *Health Services and Delivery Research*. 2019;7(23).
- 21 35. Rosella LC, Manuel DG, Burchill C, Stukel TA. A population-based risk algorithm for the
- 22 development of diabetes: Development and validation of the diabetes population risk
- 23 tool (DPoRT). *J Epidemiol Community Health (1978)*. 2011;65(7):613–20.
- 24 36. Manuel DG, Tuna M, Bennett C, Hennessy D, Rosella L, Sanmartin C, et al. Development
- 25 and validation of a cardiovascular disease risk-prediction model using population health
- 26 surveys: The Cardiovascular Disease Population Risk Tool (CVDPoRT). *CMAJ*.
- 27 2018;190(29):E871–82.
- 28 37. Wang J, Manuel D, Williams J, Schmitz N, Gilmour H, Patten S, et al. Development and
- 29 validation of prediction algorithms for major depressive episode in the general
- 30 population. *J Affect Disord*. 2013;151(1):39–45.
- 31 38. Wang J, Sareen J, Patten S, Bolton J, Schmitz N, Birney A. A prediction algorithm for first
- 32 onset of major depression in the general population: development and validation. *J*
- 33 *Epidemiol Community Health (1978)*. 2014 May;68(5):418–24.
- 34 39. Steyerberg EW. *Clinical Prediction Models. A Practical Approach to Development,*
- 35 *Validation, and Updating*. Springer; 2009.
- 36
- 37
- 38
- 39
- 40
- 41
- 42
- 43
- 44
- 45
- 46
- 47
- 48
- 49
- 50
- 51
- 52
- 53
- 54
- 55
- 56
- 57
- 58
- 59
- 60



1  
2  
3 Supplementary file #1:  
4

5  
6 Guiding questions for qualitative interviews.  
7

- 8 1) What are the currently policies and practices for suicide prevention that you know?  
9 2) What are the challenges you are facing in suicide prevention at population level?  
10 3) What are your views on using risk predictive tools for facilitating suicide prevention in  
11 the population? The advantages and drawbacks?  
12 4) what are your thoughts about using artificial intelligence and machine learning for  
13 suicide prevention? The potential pros and cons?  
14 5) From your view, how an ideal risk prediction tool should look like, that assists in your  
15 decision making?  
16 6) What visualization formats you have been using, and what are the limits of these  
17 visualization methods?  
18 7) What do you think of the visualization model presented to you?  
19  
20  
21  
22  
23  
24  
25  
26  
27  
28  
29  
30  
31  
32  
33  
34  
35  
36  
37  
38  
39  
40  
41  
42  
43  
44  
45  
46  
47  
48  
49  
50  
51  
52  
53  
54  
55  
56  
57  
58  
59  
60

## APPENDIX I\_1: CANDIDATE PREDICTORS

### i. PSYCHIATRIC DISORDERS DIAGNOSIS<sup>1</sup>

- Substance use disorder<sup>2</sup>
  - o Alcohol use disorder
  - o drug use disorder
- Mood disorder
  - Major depressive disorder
  - Bipolar disorder
- Anxiety disorder
- Schizophrenia
- Personality disorders
- ADHD
- Other diagnosis

| derived variables <sup>34</sup> | variable name       |
|---------------------------------|---------------------|
| Substance use disorder          | psydx_subuse_3      |
| Substance use disorder          | psydx_subuse_6      |
| Substance use disorder          | psydx_subuse_12     |
| Substance use disorder          | psydx_subuse_24     |
| Substance use disorder          | psydx_subuse_36     |
| Substance use disorder          | psydx_subuse_48     |
| Substance use disorder          | psydx_subuse_60     |
| Alcohol use disorder            | Psydx_alcoholuse_3  |
| Alcohol use disorder            | Psydx_alcoholuse_6  |
| Alcohol use disorder            | Psydx_alcoholuse_12 |
| Alcohol use disorder            | Psydx_alcoholuse_24 |
| Alcohol use disorder            | Psydx_alcoholuse_36 |
| Alcohol use disorder            | Psydx_alcoholuse_48 |
| Alcohol use disorder            | Psydx_alcoholuse_60 |
| Drug use disorder               | Psydx_druguse_3     |
| Drug use disorder               | Psydx_druguse_6     |
| Drug use disorder               | Psydx_druguse_12    |
| Drug use disorder               | Psydx_druguse_24    |
| Drug use disorder               | Psydx_druguse_36    |
| Drug use disorder               | Psydx_druguse_48    |
| Drug use disorder               | Psydx_druguse_60    |

The candidate predictors were captured using timeframes of prior 3, 6, 12, 24, 36, 48, and/or 60 months, indicated by the last digits of the variable name. For instance, "psydx\_subuse\_3" and "psydx\_subuse\_6" refer to a diagnosis of substance use disorder in the prior 3 and 6 months, respectively

|                           |                  |
|---------------------------|------------------|
| mood disorder             | Psydx_mood_3     |
| mood disorder             | Psydx_mood_6     |
| mood disorder             | Psydx_mood_12    |
| mood disorder             | Psydx_mood_24    |
| mood disorder             | Psydx_mood_36    |
| mood disorder             | Psydx_mood_48    |
| mood disorder             | Psydx_mood_60    |
| Anxiety disorder          | psydx_anx_3      |
| Anxiety disorder          | psydx_anx_6      |
| Anxiety disorder          | psydx_anx_12     |
| Anxiety disorder          | psydx_anx_24     |
| Anxiety disorder          | psydx_anx_36     |
| Anxiety disorder          | psydx_anx_48     |
| Anxiety disorder          | psydx_anx_60     |
| Major Depressive Disorder | Psydx_dep_3      |
| Major Depressive Disorder | Psydx_dep_6      |
| Major Depressive Disorder | Psydx_dep_12     |
| Major Depressive Disorder | Psydx_dep_24     |
| Major Depressive Disorder | Psydx_dep_36     |
| Major Depressive Disorder | Psydx_dep_48     |
| Major Depressive Disorder | Psydx_dep_60     |
| Bipolar disorder          | Psydx_bipolar_3  |
| Bipolar disorder          | Psydx_bipolar_6  |
| Bipolar disorder          | Psydx_bipolar_12 |
| Bipolar disorder          | Psydx_bipolar_24 |
| Bipolar disorder          | Psydx_bipolar_36 |
| Bipolar disorder          | Psydx_bipolar_48 |
| Bipolar disorder          | Psydx_bipolar_60 |
| Schizophrenia             | psydx_scz_3      |
| Schizophrenia             | psydx_scz_6      |
| Schizophrenia             | psydx_scz_12     |
| Schizophrenia             | psydx_scz_24     |
| Schizophrenia             | psydx_scz_36     |
| Schizophrenia             | psydx_scz_48     |
| Schizophrenia             | psydx_scz_60     |
| Personality disorder      | psydx_pd_3       |
| Personality disorder      | psydx_pd_6       |
| Personality disorder      | psydx_pd_12      |
| Personality disorder      | psydx_pd_24      |
| Personality disorder      | psydx_pd_36      |
| Personality disorder      | psydx_pd_48      |

|                      |               |
|----------------------|---------------|
| Personality disorder | psydx_pd_60   |
| ADHD                 | psydx_adhd_3  |
| ADHD                 | psydx_adhd_6  |
| ADHD                 | psydx_adhd_12 |
| ADHD                 | psydx_adhd_24 |
| ADHD                 | psydx_adhd_36 |
| ADHD                 | psydx_adhd_48 |
| ADHD                 | psydx_adhd_60 |
| Other diagnosis      | psydx_otr_3   |
| Other diagnosis      | psydx_otr_6   |
| Other diagnosis      | psydx_otr_12  |
| Other diagnosis      | psydx_otr_24  |
| Other diagnosis      | psydx_otr_36  |
| Other diagnosis      | psydx_otr_48  |
| Other diagnosis      | psydx_otr_60  |

## ii. PHARMACOLOGICAL TREATMENTS FOR MENTAL HEALTH DISORDERS

- Typical antipsychotics
- Atypical antipsychotics
- Clozapine
- Antidepressant for anxiety or depression
- Antidepressants for other reasons
- Mood stabilizer
- Anxiolytic
- ADHD medication

| <b>derived variables<sup>5</sup></b> | <b>variable name</b>     |
|--------------------------------------|--------------------------|
| Typical antipsychotics               | rx_psy_antipsych_typ_3   |
| Typical antipsychotics               | rx_psy_antipsych_typ_6   |
| Typical antipsychotics               | rx_psy_antipsych_typ_12  |
| Typical antipsychotics               | rx_psy_antipsych_typ_24  |
| Typical antipsychotics               | rx_psy_antipsych_typ_36  |
| Typical antipsychotics               | rx_psy_antipsych_typ_48  |
| Typical antipsychotics               | rx_psy_antipsych_typ_60  |
| Atypical antipsychotics              | rx_psy_antipsych_atyp_3  |
| Atypical antipsychotics              | rx_psy_antipsych_atyp_6  |
| Atypical antipsychotics              | rx_psy_antipsych_atyp_12 |
| Atypical antipsychotics              | rx_psy_antipsych_atyp_24 |
| Atypical antipsychotics              | rx_psy_antipsych_atyp_36 |
| Atypical antipsychotics              | rx_psy_antipsych_atyp_48 |

|                                          |                          |
|------------------------------------------|--------------------------|
| Atypical antipsychotics                  | rx_psy_antipsych_atyp_60 |
| Clozapine                                | rx_psy_clozapine_3       |
| Clozapine                                | rx_psy_clozapine_6       |
| Clozapine                                | rx_psy_clozapine_12      |
| Clozapine                                | rx_psy_clozapine_24      |
| Clozapine                                | rx_psy_clozapine_36      |
| Clozapine                                | rx_psy_clozapine_48      |
| Clozapine                                | rx_psy_clozapine_60      |
| antidepressant for anxiety or depression | rx_psy_antidep_anxdep_3  |
| antidepressant for anxiety or depression | rx_psy_antidep_anxdep_6  |
| antidepressant for anxiety or depression | rx_psy_antidep_anxdep_12 |
| antidepressant for anxiety or depression | rx_psy_antidep_anxdep_24 |
| antidepressant for anxiety or depression | rx_psy_antidep_anxdep_36 |
| antidepressant for anxiety or depression | rx_psy_antidep_anxdep_48 |
| antidepressant for anxiety or depression | rx_psy_antidep_anxdep_60 |
| antidepressant for other reasons         | rx_psy_antidep_otr_3     |
| Antidepressant for other reasons         | rx_psy_antidep_otr_6     |
| Antidepressant for other reasons         | rx_psy_antidep_otr_12    |
| Antidepressant for other reasons         | rx_psy_antidep_otr_24    |
| Antidepressant for other reasons         | rx_psy_antidep_otr_36    |
| Antidepressant for other reasons         | rx_psy_antidep_otr_48    |
| Antidepressant for other reasons         | rx_psy_antidep_otr_60    |
| mood stabilizer                          | rx_psy_mdestb_3          |
| mood stabilizer                          | rx_psy_mdestb_6          |
| mood stabilizer                          | rx_psy_mdestb_12         |
| mood stabilizer                          | rx_psy_mdestb_24         |
| mood stabilizer                          | rx_psy_mdestb_36         |
| mood stabilizer                          | rx_psy_mdestb_48         |
| mood stabilizer                          | rx_psy_mdestb_60         |
| anxiolytics                              | rx_psy_anx_3             |
| anxiolytics                              | rx_psy_anx_6             |
| anxiolytics                              | rx_psy_anx_12            |
| anxiolytics                              | rx_psy_anx_24            |
| anxiolytics                              | rx_psy_anx_36            |
| anxiolytics                              | rx_psy_anx_48            |
| anxiolytics                              | rx_psy_anx_60            |
| ADHD medication                          | rx_psy_adhd_3            |
| ADHD medication                          | rx_psy_adhd_6            |
| ADHD medication                          | rx_psy_adhd_12           |
| ADHD medication                          | rx_psy_adhd_24           |
| ADHD medication                          | rx_psy_adhd_36           |

|                 |                |
|-----------------|----------------|
| ADHD medication | rx_psy_adhd_48 |
| ADHD medication | rx_psy_adhd_60 |

### iii. NON-PHARMACOLOGICAL TREATMENTS FOR MENTAL HEALTH DISORDERS

- duration of hospitalisations for mental health reasons (continuous, sum of days)
- number of hospitalisations for mental health reasons (continuous)
- duration of hospitalisations for suicide attempt (continuous, sum of days)
- number of hospitalisations for suicide attempt (continuous)
- Number of care center visits for mental health reasons (continuous)
- number of general practitioner visits for mental health reasons (continuous)
- number of emergency room visits for mental health reasons (continuous)
- number of outpatient psychiatrist visits (continuous)
- number of other specialist visits for mental health reasons (continuous)
- number of psychotherapy visits with a psychiatrist (continuous)
- number of psychotherapy visits with a general practitioner (continuous)
- number of psychotherapy visits with another specialist (continuous)
- Number of outpatient paediatrician visits (continuous)
- No mental health services
- number of ECT treatments received (continuous)
- Acute ECT received (dichotomous)
- Maintenance ECT received (dichotomous)

| derived variables                                      | variable name            |
|--------------------------------------------------------|--------------------------|
| Duration of hospit for suicide attempt (conti, # days) | duration_hosp_suicide_3  |
| duration of hospit for suicide attempt (conti, # days) | duration_hosp_suicide_6  |
| duration of hospit for suicide attempt (conti, # days) | duration_hosp_suicide_12 |
| duration of hospit for suicide attempt (conti, # days) | duration_hosp_suicide_24 |
| duration of hospit for suicide attempt (conti, # days) | duration_hosp_suicide_36 |
| duration of hospit for suicide attempt (conti, # days) | duration_hosp_suicide_48 |
| duration of hospit for suicide attempt (conti, # days) | duration_hosp_suicide_60 |
| # of hospit for suicide attempt (continuous)           | #_hosp_suicide_3         |
| # of hospit for suicide attempt (continuous)           | #_hosp_suicide_6         |
| # of hospit for suicide attempt (continuous)           | #_hosp_suicide_12        |
| # of hospit for suicide attempt (continuous)           | #_hosp_suicide_24        |
| # of hospit for suicide attempt (continuous)           | #_hosp_suicide_36        |
| # of hospit for suicide attempt (continuous)           | #_hosp_suicide_48        |
| # of hospit for suicide attempt (continuous)           | #_hosp_suicide_60        |
| Duration of hospit for mh reasons (conti, # of days)   | Duration_hosp_mh_3       |
| Duration of hospit for mh reasons (conti, # of days)   | Duration_hosp_mh_6       |
| Duration of hospit for mh reasons (conti, # of days)   | Duration_hosp_mh_12      |
| Duration of hospit for mh reasons (conti, # of days)   | Duration_hosp_mh_24      |
| Duration of hospit for mh reasons (conti, # of days)   | Duration_hosp_mh_36      |
| Duration of hospit for mh reasons (conti, # of days)   | Duration_hosp_mh_48      |
| Duration of hospit for mh reasons (conti, # of days)   | Duration_hosp_mh_60      |

|    |                                                              |                         |
|----|--------------------------------------------------------------|-------------------------|
| 1  |                                                              |                         |
| 2  |                                                              |                         |
| 3  |                                                              |                         |
| 4  | # of hospit for mh reasons (continuous)                      | #_hosp_mh_3             |
| 5  | # of hospit for mh reasons (continuous)                      | #_hosp_mh_6             |
| 6  | # of hospit for mh reasons (continuous)                      | #_hosp_mh_12            |
| 7  | # of hospit for mh reasons (continuous)                      | #_hosp_mh_24            |
| 8  | # of hospit for mh reasons (continuous)                      | #_hosp_mh_36            |
| 9  | # of hospit for mh reasons (continuous)                      | #_hosp_mh_48            |
| 10 | # of hospit for mh reasons (continuous)                      | #_hosp_mh_60            |
| 11 | # of hospit for mh reasons (continuous)                      | #_hosp_mh_60            |
| 12 | # of outpatient paediatrician visits (continuous)            | #_outpat_pediatician_3  |
| 13 | # of outpatient paediatrician visits (continuous)            | #_outpat_pediatician_6  |
| 14 | # of outpatient paediatrician visits (continuous)            | #_outpat_pediatician_12 |
| 15 | # of outpatient paediatrician visits (continuous)            | #_outpat_pediatician_24 |
| 16 | # of outpatient paediatrician visits (continuous)            | #_outpat_pediatician_36 |
| 17 | # of outpatient paediatrician visits (continuous)            | #_outpat_pediatician_48 |
| 18 | # of outpatient paediatrician visits (continuous)            | #_outpat_pediatician_60 |
| 19 | # of outpatient paediatrician visits (continuous)            | #_outpat_pediatician_60 |
| 20 | Number of Care center for mental health reasons (continuous) | #_Carectr_mh_3          |
| 21 | Number of Care center for mental health reasons (continuous) | #_Carectr_mh_6          |
| 22 | Number of Care center for mental health reasons (continuous) | #_Carectr_mh_12         |
| 23 | Number of Care center for mental health reasons (continuous) | #_Carectr_mh_24         |
| 24 | Number of Care center for mental health reasons (continuous) | #_Carectr_mh_36         |
| 25 | Number of Care center for mental health reasons (continuous) | #_Carectr_mh_48         |
| 26 | Number of Care center for mental health reasons (continuous) | #_Carectr_mh_60         |
| 27 | Number of Care center for mental health reasons (continuous) | #_Carectr_mh_60         |
| 28 | # of emergency visits for mh reasons (continuous)            | #_ER_mh_3               |
| 29 | # of emergency visits for mh reasons (continuous)            | #_ER_mh_6               |
| 30 | # of emergency visits for mh reasons (continuous)            | #_ER_mh_12              |
| 31 | # of emergency visits for mh reasons (continuous)            | #_ER_mh_24              |
| 32 | # of emergency visits for mh reasons (continuous)            | #_ER_mh_36              |
| 33 | # of emergency visits for mh reasons (continuous)            | #_ER_mh_48              |
| 34 | # of emergency visits for mh reasons (continuous)            | #_ER_mh_60              |
| 35 | # of emergency visits for mh reasons (continuous)            | #_ER_mh_60              |
| 36 | # of GP visits for mh reasons (continuous)                   | #_gp_mh_3               |
| 37 | # of GP visits for mh reasons (continuous)                   | #_gp_mh_6               |
| 38 | # of GP visits for mh reasons (continuous)                   | #_gp_mh_12              |
| 39 | # of GP visits for mh reasons (continuous)                   | #_gp_mh_24              |
| 40 | # of GP visits for mh reasons (continuous)                   | #_gp_mh_36              |
| 41 | # of GP visits for mh reasons (continuous)                   | #_gp_mh_48              |
| 42 | # of GP visits for mh reasons (continuous)                   | #_gp_mh_60              |
| 43 | # of GP visits for mh reasons (continuous)                   | #_gp_mh_60              |
| 44 | # of outpatient psychiatrist visits (continuous)             | #_psy_mh_3              |
| 45 | # of outpatient psychiatrist visits (continuous)             | #_psy_mh_6              |
| 46 | # of outpatient psychiatrist visits (continuous)             | #_psy_mh_12             |
| 47 | # of outpatient psychiatrist visits (continuous)             | #_psy_mh_24             |
| 48 | # of outpatient psychiatrist visits (continuous)             | #_psy_mh_36             |
| 49 | # of outpatient psychiatrist visits (continuous)             | #_psy_mh_48             |
| 50 | # of outpatient psychiatrist visits (continuous)             | #_psy_mh_48             |
| 51 |                                                              |                         |
| 52 |                                                              |                         |
| 53 |                                                              |                         |
| 54 |                                                              |                         |
| 55 |                                                              |                         |
| 56 |                                                              |                         |
| 57 |                                                              |                         |
| 58 |                                                              |                         |
| 59 |                                                              |                         |
| 60 |                                                              |                         |

|    |                                                         |                     |
|----|---------------------------------------------------------|---------------------|
| 1  |                                                         |                     |
| 2  |                                                         |                     |
| 3  | # of outpatient psychiatrist visits (continuous)        | #_psy_mh_60         |
| 4  | # of psychotherapy visits with a psychiatrist (conti)   | #_psychotx_psy_3    |
| 5  | # of psychotherapy visits with a psychiatrist (conti)   | #_psychotx_psy_6    |
| 6  | # of psychotherapy visits with a psychiatrist (conti)   | #_psychotx_psy_12   |
| 7  | # of psychotherapy visits with a psychiatrist (conti)   | #_psychotx_psy_24   |
| 8  | # of psychotherapy visits with a psychiatrist (conti)   | #_psychotx_psy_36   |
| 9  | # of psychotherapy visits with a psychiatrist (conti)   | #_psychotx_psy_48   |
| 10 | # of psychotherapy visits with a psychiatrist (conti)   | #_psychotx_psy_60   |
| 11 | # of other specialist visits for mh reasons (conti)     | #_spc_mh_3          |
| 12 | # of other specialist visits for mh reasons (conti)     | #_spc_mh_6          |
| 13 | # of other specialist visits for mh reasons (conti)     | #_spc_mh_12         |
| 14 | # of other specialist visits for mh reasons (conti)     | #_spc_mh_24         |
| 15 | # of other specialist visits for mh reasons (conti)     | #_spc_mh_36         |
| 16 | # of other specialist visits for mh reasons (conti)     | #_spc_mh_48         |
| 17 | # of other specialist visits for mh reasons (conti)     | #_spc_mh_60         |
| 18 | # of psychotherapy visits with a GP (conti)             | #_psychotx_gp_3     |
| 19 | # of psychotherapy visits with a GP (conti)             | #_psychotx_gp_6     |
| 20 | # of psychotherapy visits with a GP (conti)             | #_psychotx_gp_12    |
| 21 | # of psychotherapy visits with a GP (conti)             | #_psychotx_gp_24    |
| 22 | # of psychotherapy visits with a GP (conti)             | #_psychotx_gp_36    |
| 23 | # of psychotherapy visits with a GP (conti)             | #_psychotx_gp_48    |
| 24 | # of psychotherapy visits with a GP (conti)             | #_psychotx_gp_60    |
| 25 | # of psychotherapy visits with other specialist (conti) | #_psychotx_other_3  |
| 26 | # of psychotherapy visits with other specialist (conti) | #_psychotx_other_6  |
| 27 | # of psychotherapy visits with other specialist (conti) | #_psychotx_other_12 |
| 28 | # of psychotherapy visits with other specialist (conti) | #_psychotx_other_24 |
| 29 | # of psychotherapy visits with other specialist (conti) | #_psychotx_other_36 |
| 30 | # of psychotherapy visits with other specialist (conti) | #_psychotx_other_48 |
| 31 | # of psychotherapy visits with other specialist (conti) | #_psychotx_other_60 |
| 32 | No mental health services                               | No_mh_services_3    |
| 33 | No mental health services                               | No_mh_services_6    |
| 34 | No mental health services                               | No_mh_services_12   |
| 35 | No mental health services                               | No_mh_services_24   |
| 36 | No mental health services                               | No_mh_services_36   |
| 37 | No mental health services                               | No_mh_services_48   |
| 38 | No mental health services                               | No_mh_services_60   |
| 39 | number of ECT received (continuous)                     | ECT_#_3             |
| 40 | number of ECT received (continuous)                     | ECT_#_6             |
| 41 | number of ECT received (continuous)                     | ECT_#_12            |
| 42 | number of ECT received (continuous)                     | ECT_#_24            |
| 43 | number of ECT received (continuous)                     | ECT_#_36            |
| 44 |                                                         |                     |
| 45 |                                                         |                     |
| 46 |                                                         |                     |
| 47 |                                                         |                     |
| 48 |                                                         |                     |
| 49 |                                                         |                     |
| 50 |                                                         |                     |
| 51 |                                                         |                     |
| 52 |                                                         |                     |
| 53 |                                                         |                     |
| 54 |                                                         |                     |
| 55 |                                                         |                     |
| 56 |                                                         |                     |
| 57 |                                                         |                     |
| 58 |                                                         |                     |
| 59 |                                                         |                     |
| 60 |                                                         |                     |



|                                     |                    |
|-------------------------------------|--------------------|
| number of ECT received (continuous) | ECT_#_48           |
| number of ECT received (continuous) | ECT_#_60           |
| acute ECT (dichotomous)             | ECT_acute_3        |
| acute ECT (dichotomous)             | ECT_acute_6        |
| acute ECT (dichotomous)             | ECT_acute_12       |
| acute ECT (dichotomous)             | ECT_acute_24       |
| acute ECT (dichotomous)             | ECT_acute_36       |
| acute ECT (dichotomous)             | ECT_acute_48       |
| acute ECT (dichotomous)             | ECT_acute_60       |
| Maintenance ECT (dichotomous)       | ECT_maintenance_3  |
| Maintenance ECT (dichotomous)       | ECT_maintenance_6  |
| Maintenance ECT (dichotomous)       | ECT_maintenance_12 |
| Maintenance ECT (dichotomous)       | ECT_maintenance_24 |
| Maintenance ECT (dichotomous)       | ECT_maintenance_36 |
| Maintenance ECT (dichotomous)       | ECT_maintenance_48 |
| Maintenance ECT (dichotomous)       | ECT_maintenance_60 |

#### iv. PHYSICAL DIAGNOSIS

- Dementia
- Neurological disease
- Endocrine system disorder
- Trauma
- Respiratory disorder
- Infectious disease
- Digestive disorder
- Cardiovascular disorder
- Cancer
- Other physical disorder
- Charlson/elixhauser index with psy (continuous)<sup>6</sup>
- Charlson/elixhauser index without psy (continuous)

| <b>derived variables</b> | <b>variable name</b> |
|--------------------------|----------------------|
| dementia                 | physdx_dem_3         |
| dementia                 | physdx_dem_6         |
| dementia                 | physdx_dem_12        |
| dementia                 | physdx_dem_24        |
| dementia                 | physdx_dem_36        |
| dementia                 | physdx_dem_48        |
| dementia                 | physdx_dem_60        |
| neurological disease     | physdx_neuro_3       |
| neurological disease     | physdx_neuro_6       |

|    |                           |                  |
|----|---------------------------|------------------|
| 1  |                           |                  |
| 2  |                           |                  |
| 3  | neurological disease      | physdx_neuro_12  |
| 4  | neurological disease      | physdx_neuro_24  |
| 5  | neurological disease      | physdx_neuro_36  |
| 6  | neurological disease      | physdx_neuro_48  |
| 7  | neurological disease      | physdx_neuro_60  |
| 8  | neurological disease      | physdx_neuro_60  |
| 9  | endocrine system disorder | physdx_endo_3    |
| 10 | endocrine system disorder | physdx_endo_6    |
| 11 | endocrine system disorder | physdx_endo_12   |
| 12 | endocrine system disorder | physdx_endo_24   |
| 13 | endocrine system disorder | physdx_endo_36   |
| 14 | endocrine system disorder | physdx_endo_48   |
| 15 | endocrine system disorder | physdx_endo_60   |
| 16 | endocrine system disorder | physdx_endo_60   |
| 17 | trauma                    | physdx_trauma_3  |
| 18 | trauma                    | physdx_trauma_6  |
| 19 | trauma                    | physdx_trauma_12 |
| 20 | trauma                    | physdx_trauma_24 |
| 21 | trauma                    | physdx_trauma_36 |
| 22 | trauma                    | physdx_trauma_48 |
| 23 | trauma                    | physdx_trauma_60 |
| 24 | trauma                    | physdx_trauma_60 |
| 25 | respiratory disorder      | physdx_resp_3    |
| 26 | respiratory disorder      | physdx_resp_6    |
| 27 | respiratory disorder      | physdx_resp_12   |
| 28 | respiratory disorder      | physdx_resp_24   |
| 29 | respiratory disorder      | physdx_resp_36   |
| 30 | respiratory disorder      | physdx_resp_48   |
| 31 | respiratory disorder      | physdx_resp_60   |
| 32 | respiratory disorder      | physdx_resp_60   |
| 33 | infectious disease        | physdx_infec_3   |
| 34 | infectious disease        | physdx_infec_6   |
| 35 | infectious disease        | physdx_infec_12  |
| 36 | infectious disease        | physdx_infec_24  |
| 37 | infectious disease        | physdx_infec_36  |
| 38 | infectious disease        | physdx_infec_48  |
| 39 | infectious disease        | physdx_infec_60  |
| 40 | infectious disease        | physdx_infec_60  |
| 41 | digestive disorder        | physdx_diges_3   |
| 42 | digestive disorder        | physdx_diges_6   |
| 43 | digestive disorder        | physdx_diges_12  |
| 44 | digestive disorder        | physdx_diges_24  |
| 45 | digestive disorder        | physdx_diges_36  |
| 46 | digestive disorder        | physdx_diges_48  |
| 47 | digestive disorder        | physdx_diges_60  |
| 48 | digestive disorder        | physdx_diges_60  |
| 49 | cardiovascular disorder   | physdx_cvd_3     |
| 50 |                           |                  |
| 51 |                           |                  |
| 52 |                           |                  |
| 53 |                           |                  |
| 54 |                           |                  |
| 55 |                           |                  |
| 56 |                           |                  |
| 57 |                           |                  |
| 58 |                           |                  |
| 59 |                           |                  |
| 60 |                           |                  |

|    |                                               |                                  |
|----|-----------------------------------------------|----------------------------------|
| 1  |                                               |                                  |
| 2  |                                               |                                  |
| 3  | cardiovascular disorder                       | physdx_cvd_6                     |
| 4  | cardiovascular disorder                       | physdx_cvd_12                    |
| 5  | cardiovascular disorder                       | physdx_cvd_24                    |
| 6  | cardiovascular disorder                       | physdx_cvd_36                    |
| 7  | cardiovascular disorder                       | physdx_cvd_48                    |
| 8  | cardiovascular disorder                       | physdx_cvd_60                    |
| 9  | cardiovascular disorder                       | physdx_cvd_60                    |
| 10 | cardiovascular disorder                       | physdx_cvd_60                    |
| 11 | cancer                                        | physdx_cncr_3                    |
| 12 | cancer                                        | physdx_cncr_6                    |
| 13 | cancer                                        | physdx_cncr_12                   |
| 14 | cancer                                        | physdx_cncr_24                   |
| 15 | cancer                                        | physdx_cncr_24                   |
| 16 | cancer                                        | physdx_cncr_36                   |
| 17 | cancer                                        | physdx_cncr_48                   |
| 18 | cancer                                        | physdx_cncr_48                   |
| 19 | cancer                                        | physdx_cncr_60                   |
| 20 | other physical disorders                      | physdx_otr_3                     |
| 21 | other physical disorders                      | physdx_otr_6                     |
| 22 | other physical disorders                      | physdx_otr_12                    |
| 23 | other physical disorders                      | physdx_otr_12                    |
| 24 | other physical disorders                      | physdx_otr_24                    |
| 25 | other physical disorders                      | physdx_otr_36                    |
| 26 | other physical disorders                      | physdx_otr_36                    |
| 27 | other physical disorders                      | physdx_otr_48                    |
| 28 | other physical disorders                      | physdx_otr_48                    |
| 29 | other physical disorders                      | physdx_otr_60                    |
| 30 | charlson/elixhauser index with psy (conti)    | physdx_comorbidity_withpsy_3     |
| 31 | charlson/elixhauser index with psy (conti)    | physdx_comorbidity_withpsy_3     |
| 32 | charlson/elixhauser index with psy (conti)    | physdx_comorbid_withpsy_6        |
| 33 | charlson/elixhauser index with psy (conti)    | physdx_comorbidity_withpsy_12    |
| 34 | charlson/elixhauser index with psy (conti)    | physdx_comorbidity_withpsy_12    |
| 35 | charlson/elixhauser index with psy (conti)    | physdx_comorbidity_withpsy_24    |
| 36 | charlson/elixhauser index with psy (conti)    | physdx_comorbidity_withpsy_24    |
| 37 | charlson/elixhauser index with psy (conti)    | physdx_comorbidity_withpsy_36    |
| 38 | charlson/elixhauser index with psy (conti)    | physdx_comorbidity_withpsy_36    |
| 39 | charlson/elixhauser index with psy (conti)    | physdx_comorbidity_withpsy_48    |
| 40 | charlson/elixhauser index with psy (conti)    | physdx_comorbidity_withpsy_48    |
| 41 | charlson/elixhauser index with psy (conti)    | physdx_comorbidity_withpsy_60    |
| 42 | charlson/elixhauser index with psy (conti)    | physdx_comorbidity_withpsy_60    |
| 43 | charlson/elixhauser index without psy (conti) | physdx_comorbidity_withoutpsy_3  |
| 44 | charlson/elixhauser index without psy (conti) | physdx_comorbidity_withoutpsy_3  |
| 45 | charlson/elixhauser index without psy (conti) | physdx_comorbid_withoutpsy_6     |
| 46 | charlson/elixhauser index without psy (conti) | physdx_comorbid_withoutpsy_6     |
| 47 | charlson/elixhauser index without psy (conti) | physdx_comorbidity_withoutpsy_12 |
| 48 | charlson/elixhauser index without psy (conti) | physdx_comorbidity_withoutpsy_12 |
| 49 | charlson/elixhauser index without psy (conti) | physdx_comorbidity_withoutpsy_24 |
| 50 | charlson/elixhauser index without psy (conti) | physdx_comorbidity_withoutpsy_24 |
| 51 | charlson/elixhauser index without psy (conti) | physdx_comorbidity_withoutpsy_36 |
| 52 | charlson/elixhauser index without psy (conti) | physdx_comorbidity_withoutpsy_36 |
| 53 | charlson/elixhauser index without psy (conti) | physdx_comorbidity_withoutpsy_36 |
| 54 | charlson/elixhauser index without psy (conti) | physdx_comorbidity_withoutpsy_36 |
| 55 |                                               |                                  |
| 56 |                                               |                                  |
| 57 |                                               |                                  |
| 58 |                                               |                                  |
| 59 |                                               |                                  |
| 60 |                                               |                                  |

|                                               |                                  |
|-----------------------------------------------|----------------------------------|
| charlson/elixhauser index without psy (conti) | physdx_comorbidity_withoutpsy_48 |
| charlson/elixhauser index without psy (conti) | physdx_comorbidity_withoutpsy_60 |

#### V. PHARMACOLOGICAL TREATMENTS FOR PHYSICAL HEALTH DISORDERS

- Medication for diabetes
- Medication for cardiovascular disease
- Medication for respiratory diseases
- Medication for gastro-intestinal disorder
- Anti-infective agent
- Pain medication
- Contraceptive
- Other medication

| derived variables                         | variable name       |
|-------------------------------------------|---------------------|
| medication for diabetes                   | rx_phys_diabetes_3  |
| medication for diabetes                   | rx_phys_diabetes_6  |
| medication for diabetes                   | rx_phys_diabetes_12 |
| medication for diabetes                   | rx_phys_diabetes_24 |
| medication for diabetes                   | rx_phys_diabetes_36 |
| medication for diabetes                   | rx_phys_diabetes_48 |
| medication for diabetes                   | rx_phys_diabetes_60 |
| medication for cardiovascular disease     | rx_phys_cvd_3       |
| medication for cardiovascular disease     | rx_phys_cvd_6       |
| medication for cardiovascular disease     | rx_phys_cvd_12      |
| medication for cardiovascular disease     | rx_phys_cvd_24      |
| medication for cardiovascular disease     | rx_phys_cvd_36      |
| medication for cardiovascular disease     | rx_phys_cvd_48      |
| medication for cardiovascular disease     | rx_phys_cvd_60      |
| medication for respiratory disease        | rx_phys_resp_3      |
| medication for respiratory disease        | rx_phys_resp_6      |
| medication for respiratory disease        | rx_phys_resp_12     |
| medication for respiratory disease        | rx_phys_resp_24     |
| medication for respiratory disease        | rx_phys_resp_36     |
| medication for respiratory disease        | rx_phys_resp_48     |
| medication for respiratory disease        | rx_phys_resp_60     |
| medication for gastro-intestinal disorder | rx_phys_gi_3        |
| medication for gastro-intestinal disorder | rx_phys_gi_6        |
| medication for gastro-intestinal disorder | rx_phys_gi_12       |
| medication for gastro-intestinal disorder | rx_phys_gi_24       |
| medication for gastro-intestinal disorder | rx_phys_gi_36       |
| medication for gastro-intestinal disorder | rx_phys_gi_48       |

|                                           |                      |
|-------------------------------------------|----------------------|
| medication for gastro-intestinal disorder | rx_phys_gi_60        |
| anti-infective agents                     | rx_phys_antiinfec_3  |
| anti-infective agents                     | rx_phys_antiinfec_6  |
| anti-infective agents                     | rx_phys_antiinfec_12 |
| anti-infective agents                     | rx_phys_antiinfec_24 |
| anti-infective agents                     | rx_phys_antiinfec_36 |
| anti-infective agents                     | rx_phys_antiinfec_48 |
| anti-infective agents                     | rx_phys_antiinfec_60 |
| pain medication                           | rx_phys_pain_3       |
| pain medication                           | rx_phys_pain_6       |
| pain medication                           | rx_phys_pain_12      |
| pain medication                           | rx_phys_pain_24      |
| pain medication                           | rx_phys_pain_36      |
| pain medication                           | rx_phys_pain_48      |
| pain medication                           | rx_phys_pain_60      |
| contraceptives                            | rx_phys_contracep_3  |
| contraceptives                            | rx_phys_contracep_6  |
| contraceptives                            | rx_phys_contracep_12 |
| contraceptives                            | rx_phys_contracep_24 |
| contraceptives                            | rx_phys_contracep_36 |
| contraceptives                            | rx_phys_contracep_48 |
| contraceptives                            | rx_phys_contracep_60 |
| other medication                          | rx_phys_otr_3        |
| other medication                          | rx_phys_otr_6        |
| other medication                          | rx_phys_otr_12       |
| other medication                          | rx_phys_otr_24       |
| other medication                          | rx_phys_otr_36       |
| other medication                          | rx_phys_otr_48       |
| other medication                          | rx_phys_otr_60       |

vi. NON-PHARMACOLOGICAL TREATMENTS FOR PHYSICAL HEALTH DISORDERS

- duration of hospitalisations for physical health reasons (continuous, sum of days)
- number of hospitalisations for physical health reasons (continuous)
- care center visits/plays for physical health reasons\*
- number of general practitioner visits for physical reasons (continuous)\*
- number of emergency room visits for physical reasons (continuous)\*
- number of outpatient specialist visits for physical health reasons (continuous)\*
- number of outpatient paediatrician visits (continuous)\*

| derived variables                                      | variable name         |
|--------------------------------------------------------|-----------------------|
| Duration of hospit for phys reasons (conti, # of days) | Duration_hosp_phys_3  |
| Duration of hospit for phys reasons (conti, # of days) | Duration_hosp_phys_6  |
| Duration of hospit for phys reasons (conti, # of days) | Duration_hosp_phys_12 |

|    |                                                          |                       |
|----|----------------------------------------------------------|-----------------------|
| 1  |                                                          |                       |
| 2  |                                                          |                       |
| 3  | Duration of hospit for phys reasons (conti, # of days)   | Duration_hosp_phys_24 |
| 4  | Duration of hospit for phys reasons (conti, # of days)   | Duration_hosp_phys_36 |
| 5  | Duration of hospit for phys reasons (conti, # of days)   | Duration_hosp_phys_48 |
| 6  | Duration of hospit for phys reasons (conti, # of days)   | Duration_hosp_phys_60 |
| 7  |                                                          |                       |
| 8  | # of hospit for phys reasons (continuous)                | #_hosp_phys_3         |
| 9  | # of hospit for phys reasons (continuous)                | #_hosp_phys_6         |
| 10 | # of hospit for phys reasons (continuous)                | #_hosp_phys_12        |
| 11 | # of hospit for phys reasons (continuous)                | #_hosp_phys_24        |
| 12 | # of hospit for phys reasons (continuous)                | #_hosp_phys_36        |
| 13 | # of hospit for phys reasons (continuous)                | #_hosp_phys_48        |
| 14 | # of hospit for phys reasons (continuous)                | #_hosp_phys_60        |
| 15 |                                                          |                       |
| 16 | Care center for physical health reasons                  | Carectr_phys_3        |
| 17 | Care center for physical health reasons                  | Carectr_phys_6        |
| 18 | Care center for physical health reasons                  | Carectr_phys_12       |
| 19 | Care center for physical health reasons                  | Carectr_phys_24       |
| 20 | Care center for physical health reasons                  | Carectr_phys_36       |
| 21 | Care center for physical health reasons                  | Carectr_phys_48       |
| 22 | Care center for physical health reasons                  | Carectr_phys_60       |
| 23 |                                                          |                       |
| 24 | # of outpatient specialist visit for phys reasons (cont) | #_spc_phys_3          |
| 25 | # of outpatient specialist visit for phys reasons (cont) | #_spc_phys_6          |
| 26 | # of outpatient specialist visit for phys reasons (cont) | #_spc_phys_12         |
| 27 | # of outpatient specialist visit for phys reasons (cont) | #_spc_phys_24         |
| 28 | # of outpatient specialist visit for phys reasons (cont) | #_spc_phys_36         |
| 29 | # of outpatient specialist visit for phys reasons (cont) | #_spc_phys_48         |
| 30 | # of outpatient specialist visit for phys reasons (cont) | #_spc_phys_60         |
| 31 |                                                          |                       |
| 32 | # of GP visits for phys reasons (continuous)             | #_gp_phys_3           |
| 33 | # of GP visits for phys reasons (continuous)             | #_gp_phys_6           |
| 34 | # of GP visits for phys reasons (continuous)             | #_gp_phys_12          |
| 35 | # of GP visits for phys reasons (continuous)             | #_gp_phys_24          |
| 36 | # of GP visits for phys reasons (continuous)             | #_gp_phys_36          |
| 37 | # of GP visits for phys reasons (continuous)             | #_gp_phys_48          |
| 38 | # of GP visits for phys reasons (continuous)             | #_gp_phys_60          |
| 39 |                                                          |                       |
| 40 | # of emergency visits for phys reasons (continuous)      | #_ER_phys_3           |
| 41 | # of emergency visits for phys reasons (continuous)      | #_ER_phys_6           |
| 42 | # of emergency visits for phys reasons (continuous)      | #_ER_phys_12          |
| 43 | # of emergency visits for phys reasons (continuous)      | #_ER_phys_24          |
| 44 | # of emergency visits for phys reasons (continuous)      | #_ER_phys_36          |
| 45 | # of emergency visits for phys reasons (continuous)      | #_ER_phys_48          |
| 46 | # of emergency visits for phys reasons (continuous)      | #_ER_phys_60          |
| 47 |                                                          |                       |
| 48 |                                                          |                       |
| 49 |                                                          |                       |

#### vii. INDIVIDUAL SOCIO-DEMOGRAPHIC VARIABLES

- Age (continuous)
- age group: 15-24
- age group: 25-34
- age group: 35-44
- age group: 45-54

- age group: 55-64
- age group: 65-74
- age group: 75-84
- age group: ≥85
- Sex
- Location – rural
- Location – non-rural
- Location – missing data
- rss 01 bas saint-laurent
- rss 02 saguenay-lac-saint-jean
- rss 03 capitale-nationale
- rss 04 mauricie et centre-du-québec
- rss 05 estrie
- rss 06 montréal
- rss 07 outaouais
- rss 08 abitibi-témiscamingue
- rss 09 côte-nord
- rss 10 nord-du-québec
- rss 11gaspésie-îles-de-la-madeleine
- rss 12 chaudière-appalaches
- rss 13 laval
- rss 14 lanaudière
- rss 15 laurentides
- rss 16 montérégie
- Adherence to the public drug plan (RAMQ) (dichotomous)

| derived variables        | variable name  |
|--------------------------|----------------|
| Age (continuous)         | Age_continuous |
| age group: 15-24         | age_15-24      |
| age group: 25-34         | age_25-34      |
| age group: 35-44         | age_35-44      |
| age group: 45-54         | age_45-54      |
| age group: 55-64         | age_55-64      |
| age group: 65-74         | age_65-74      |
| age group: 75-84         | age_75-84      |
| age group: ≥85           | age_85+        |
| sex male                 | sex_m          |
| sex female               | sex_f          |
| rss 01 bas-saint-laurent | loc_rss_01_3   |
| rss 01 bas-saint-laurent | loc_rss_01_6   |
| rss 01 bas-saint-laurent | loc_rss_01_12  |
| rss 01 bas-saint-laurent | loc_rss_01_24  |
| rss 01 bas-saint-laurent | loc_rss_01_36  |

|    |                                     |               |
|----|-------------------------------------|---------------|
| 1  |                                     |               |
| 2  |                                     |               |
| 3  | rss 01 bas-saint-laurent            | loc_rss_01_48 |
| 4  | rss 01 bas-saint-laurent            | loc_rss_01_60 |
| 5  |                                     |               |
| 6  | rss 02 saguenay-lac-saint-jean      | loc_rss_02_3  |
| 7  | rss 02 saguenay-lac-saint-jean      | loc_rss_02_6  |
| 8  | rss 02 saguenay-lac-saint-jean      | loc_rss_02_12 |
| 9  |                                     |               |
| 10 | rss 02 saguenay-lac-saint-jean      | loc_rss_02_24 |
| 11 | rss 02 saguenay-lac-saint-jean      | loc_rss_02_36 |
| 12 | rss 02 saguenay-lac-saint-jean      | loc_rss_02_48 |
| 13 | rss 02 saguenay-lac-saint-jean      | loc_rss_02_60 |
| 14 |                                     |               |
| 15 | rss 03 capitale-nationale           | loc_rss_03_3  |
| 16 | rss 03 capitale-nationale           | loc_rss_03_6  |
| 17 | rss 03 capitale-nationale           | loc_rss_03_12 |
| 18 | rss 03 capitale-nationale           | loc_rss_03_24 |
| 19 |                                     |               |
| 20 | rss 03 capitale-nationale           | loc_rss_03_36 |
| 21 | rss 03 capitale-nationale           | loc_rss_03_48 |
| 22 | rss 03 capitale-nationale           | loc_rss_03_60 |
| 23 |                                     |               |
| 24 | rss 04 mauricie et centre-du-québec | loc_rss_04_3  |
| 25 | rss 04 mauricie et centre-du-québec | loc_rss_04_6  |
| 26 | rss 04 mauricie et centre-du-québec | loc_rss_04_12 |
| 27 | rss 04 mauricie et centre-du-québec | loc_rss_04_24 |
| 28 | rss 04 mauricie et centre-du-québec | loc_rss_04_36 |
| 29 | rss 04 mauricie et centre-du-québec | loc_rss_04_48 |
| 30 | rss 04 mauricie et centre-du-québec | loc_rss_04_60 |
| 31 |                                     |               |
| 32 | rss 05 estrie                       | loc_rss_05_3  |
| 33 | rss 05 estrie                       | loc_rss_05_6  |
| 34 | rss 05 estrie                       | loc_rss_05_12 |
| 35 | rss 05 estrie                       | loc_rss_05_24 |
| 36 | rss 05 estrie                       | loc_rss_05_36 |
| 37 | rss 05 estrie                       | loc_rss_05_48 |
| 38 | rss 05 estrie                       | loc_rss_05_60 |
| 39 |                                     |               |
| 40 | rss 06 montréal                     | loc_rss_06_3  |
| 41 | rss 06 montréal                     | loc_rss_06_6  |
| 42 | rss 06 montréal                     | loc_rss_06_12 |
| 43 | rss 06 montréal                     | loc_rss_06_24 |
| 44 | rss 06 montréal                     | loc_rss_06_36 |
| 45 | rss 06 montréal                     | loc_rss_06_48 |
| 46 | rss 06 montréal                     | loc_rss_06_60 |
| 47 |                                     |               |
| 48 | rss 07 outaouais                    | loc_rss_07_3  |
| 49 | rss 07 outaouais                    | loc_rss_07_6  |
| 50 | rss 07 outaouais                    | loc_rss_07_12 |
| 51 | rss 07 outaouais                    | loc_rss_07_24 |
| 52 |                                     |               |
| 53 |                                     |               |
| 54 |                                     |               |
| 55 |                                     |               |
| 56 |                                     |               |
| 57 |                                     |               |
| 58 |                                     |               |
| 59 |                                     |               |
| 60 |                                     |               |



|    |                                      |               |
|----|--------------------------------------|---------------|
| 1  |                                      |               |
| 2  |                                      |               |
| 3  | rss 07 outaouais                     | loc_rss_07_36 |
| 4  | rss 07 outaouais                     | loc_rss_07_48 |
| 5  | rss 07 outaouais                     | loc_rss_07_60 |
| 6  | rss 07 outaouais                     | loc_rss_07_60 |
| 7  | 08 abitibi-témiscamingue             | loc_rss_08_3  |
| 8  | rss 08 abitibi-témiscamingue         | loc_rss_08_6  |
| 9  | rss 08 abitibi-témiscamingue         | loc_rss_08_12 |
| 10 | rss 08 abitibi-témiscamingue         | loc_rss_08_12 |
| 11 | rss 08 abitibi-témiscamingue         | loc_rss_08_24 |
| 12 | 08 abitibi-témiscamingue             | loc_rss_08_36 |
| 13 | rss 08 abitibi-témiscamingue         | loc_rss_08_48 |
| 14 | rss 08 abitibi-témiscamingue         | loc_rss_08_48 |
| 15 | rss 08 abitibi-témiscamingue         | loc_rss_08_60 |
| 16 | rss 09 côte-nord                     | loc_rss_09_3  |
| 17 | rss 09 côte-nord                     | loc_rss_09_6  |
| 18 | rss 09 côte-nord                     | loc_rss_09_12 |
| 19 | rss 09 côte-nord                     | loc_rss_09_12 |
| 20 | rss 09 côte-nord                     | loc_rss_09_24 |
| 21 | rss 09 côte-nord                     | loc_rss_09_36 |
| 22 | rss 09 côte-nord                     | loc_rss_09_36 |
| 23 | rss 09 côte-nord                     | loc_rss_09_48 |
| 24 | rss 09 côte-nord                     | loc_rss_09_60 |
| 25 | rss 10 nord-du-québec                | loc_rss_10_3  |
| 26 | rss 10 nord-du-québec                | loc_rss_10_6  |
| 27 | rss 10 nord-du-québec                | loc_rss_10_6  |
| 28 | rss 10 nord-du-québec                | loc_rss_10_12 |
| 29 | rss 10 nord-du-québec                | loc_rss_10_24 |
| 30 | rss 10 nord-du-québec                | loc_rss_10_24 |
| 31 | rss 10 nord-du-québec                | loc_rss_10_36 |
| 32 | rss 10 nord-du-québec                | loc_rss_10_48 |
| 33 | rss 10 nord-du-québec                | loc_rss_10_60 |
| 34 | rss 11 gaspésie-îles-de-la-madeleine | loc_rss_11_3  |
| 35 | rss 11 gaspésie-îles-de-la-madeleine | loc_rss_11_6  |
| 36 | rss 11 gaspésie-îles-de-la-madeleine | loc_rss_11_6  |
| 37 | rss 11 gaspésie-îles-de-la-madeleine | loc_rss_11_12 |
| 38 | rss 11 gaspésie-îles-de-la-madeleine | loc_rss_11_24 |
| 39 | rss 11 gaspésie-îles-de-la-madeleine | loc_rss_11_24 |
| 40 | rss 11 gaspésie-îles-de-la-madeleine | loc_rss_11_36 |
| 41 | rss 11 gaspésie-îles-de-la-madeleine | loc_rss_11_48 |
| 42 | rss 11 gaspésie-îles-de-la-madeleine | loc_rss_11_60 |
| 43 | rss 12 chaudière-appalaches          | loc_rss_12_3  |
| 44 | rss 12 chaudière-appalaches          | loc_rss_12_6  |
| 45 | rss 12 chaudière-appalaches          | loc_rss_12_6  |
| 46 | rss 12 chaudière-appalaches          | loc_rss_12_12 |
| 47 | rss 12 chaudière-appalaches          | loc_rss_12_24 |
| 48 | rss 12 chaudière-appalaches          | loc_rss_12_24 |
| 49 | rss 12 chaudière-appalaches          | loc_rss_12_36 |
| 50 | rss 12 chaudière-appalaches          | loc_rss_12_48 |
| 51 | rss 12 chaudière-appalaches          | loc_rss_12_60 |
| 52 | rss 13 laval                         | loc_rss_13_3  |
| 53 | rss 13 laval                         | loc_rss_13_6  |
| 54 | rss 13 laval                         | loc_rss_13_6  |
| 55 | rss 13 laval                         | loc_rss_13_12 |
| 56 |                                      |               |
| 57 |                                      |               |
| 58 |                                      |               |
| 59 |                                      |               |
| 60 |                                      |               |

|    |                       |               |
|----|-----------------------|---------------|
| 1  |                       |               |
| 2  |                       |               |
| 3  | rss 13 laval          | loc_rss_13_24 |
| 4  | rss 13 laval          | loc_rss_13_36 |
| 5  | rss 13 laval          | loc_rss_13_48 |
| 6  | rss 13 laval          | loc_rss_13_60 |
| 7  | rss 14 lanaudière     | loc_rss_14_3  |
| 8  | rss 14 lanaudière     | loc_rss_14_6  |
| 9  | rss 14 lanaudière     | loc_rss_14_12 |
| 10 | rss 14 lanaudière     | loc_rss_14_24 |
| 11 | rss 14 lanaudière     | loc_rss_14_36 |
| 12 | rss 14 lanaudière     | loc_rss_14_48 |
| 13 | rss 14 lanaudière     | loc_rss_14_60 |
| 14 | rss 15 laurentides    | loc_rss_15_3  |
| 15 | rss 15 laurentides    | loc_rss_15_6  |
| 16 | rss 15 laurentides    | loc_rss_15_12 |
| 17 | rss 15 laurentides    | loc_rss_15_24 |
| 18 | rss 15 laurentides    | loc_rss_15_36 |
| 19 | rss 15 laurentides    | loc_rss_15_48 |
| 20 | rss 15 laurentides    | loc_rss_15_60 |
| 21 | rss 16 montérégie     | loc_rss_16_3  |
| 22 | rss 16 montérégie     | loc_rss_16_6  |
| 23 | rss 16 montérégie     | loc_rss_16_12 |
| 24 | rss 16 montérégie     | loc_rss_16_24 |
| 25 | rss 16 montérégie     | loc_rss_16_36 |
| 26 | rss 16 montérégie     | loc_rss_16_48 |
| 27 | rss 16 montérégie     | loc_rss_16_60 |
| 28 | location nonrural     | nonrural_3    |
| 29 | location nonrural     | nonrural_6    |
| 30 | location nonrural     | nonrural_12   |
| 31 | location nonrural     | nonrural_24   |
| 32 | location nonrural     | nonrural_36   |
| 33 | location nonrural     | nonrural_48   |
| 34 | location nonrural     | nonrural_60   |
| 35 | location rural        | rural_3       |
| 36 | location rural        | rural_6       |
| 37 | location rural        | rural_12      |
| 38 | location rural        | rural_24      |
| 39 | location rural        | rural_36      |
| 40 | location rural        | rural_48      |
| 41 | location rural        | rural_60      |
| 42 | location missing data | loc_missing_3 |
| 43 | location missing data | loc_missing_6 |
| 44 |                       |               |
| 45 |                       |               |
| 46 |                       |               |
| 47 |                       |               |
| 48 |                       |               |
| 49 |                       |               |
| 50 |                       |               |
| 51 |                       |               |
| 52 |                       |               |
| 53 |                       |               |
| 54 |                       |               |
| 55 |                       |               |
| 56 |                       |               |
| 57 |                       |               |
| 58 |                       |               |
| 59 |                       |               |
| 60 |                       |               |

|                                          |                 |
|------------------------------------------|-----------------|
| location missing data                    | loc_missing_12  |
| location missing data                    | loc_missing_24  |
| location missing data                    | loc_missing_36  |
| location missing data                    | loc_missing_48  |
| location missing data                    | loc_missing_60  |
| adherence to the public drug plan (RAMQ) | PublicRxPlan_3  |
| adherence to the public drug plan (RAMQ) | PublicRxPlan_6  |
| adherence to the public drug plan (RAMQ) | PublicRxPlan_12 |
| adherence to the public drug plan (RAMQ) | PublicRxPlan_24 |
| adherence to the public drug plan (RAMQ) | PublicRxPlan_36 |
| adherence to the public drug plan (RAMQ) | PublicRxPlan_48 |
| adherence to the public drug plan (RAMQ) | PublicRxPlan_60 |

## ENVIRONMENTAL VARIABLES

### i. DEPRIVATION INDEX

- Material deprivation (from 1, least deprived to 5, most deprived)
- Social deprivation (from 1, least deprived to 5, most deprived)

| <b>derived variables<sup>7</sup></b> | <b>variable name</b> |
|--------------------------------------|----------------------|
| material deprivation (1-5)           | matdep_3             |
| material deprivation (1-5)           | matdep_6             |
| material deprivation (1-5)           | matdep_12            |
| material deprivation (1-5)           | matdep_24            |
| material deprivation (1-5)           | matdep_36            |
| material deprivation (1-5)           | matdep_48            |
| material deprivation (1-5)           | matdep_60            |
| social deprivation (1-5)             | socdep_3             |
| social deprivation (1-5)             | socdep_6             |
| social deprivation (1-5)             | socdep_12            |
| social deprivation (1-5)             | socdep_24            |
| social deprivation (1-5)             | socdep_36            |
| social deprivation (1-5)             | socdep_48            |
| social deprivation (1-5)             | socdep_60            |

## SYSTEM VARIABLES

### i. HEALTH SYSTEM ENVIRONMENT (HEALTH SYSTEM)

- Mental health budget

1  
2  
3  
4  
5  
6  
7  
8  
9  
10  
11  
12  
13  
14  
15  
16  
17  
18  
19  
20  
21  
22  
23  
24  
25  
26  
27  
28  
29  
30  
31  
32  
33  
34  
35  
36  
37  
38  
39  
40  
41  
42  
43  
44  
45  
46  
47  
48  
49  
50  
51  
52  
53  
54  
55  
56  
57  
58  
59  
60

- Bas-Saint-Laurent
- Saguenay-Lac-Saint-Jean
- Capitale-Nationale
- Mauricie et Centre-du-Québec
- Estrie
- Montréal
- Outaouais
- Abitibi-Témiscamingue
- Côte-Nord
- Nord-du-Québec
- Gaspésie-îles-de-la-Madeleine
- Chaudière-Appalaches
- Laval
- Lanaudière
- Laurentides
- Montérégie
- Addictions budget
  - Bas-Saint-Laurent
  - Saguenay-Lac-Saint-Jean
  - Capitale-Nationale
  - Mauricie et Centre-du-Québec
  - Estrie
  - Montréal
  - Outaouais
  - Abitibi-Témiscamingue
  - Côte-Nord
  - Nord-du-Québec
  - Gaspésie-îles-de-la-Madeleine
  - Chaudière-Appalaches
  - Laval
  - Lanaudière
  - Laurentides
  - Montérégie
- regional mental health budget (\$/capita)
  - 2018-2019
  - 2017-2018
  - 2016-2017
  - 2015-2016
- regional addictions health budget (\$/capita)
  - 2018-2019
  - 2017-2018
  - 2016-2017
  - 2015-2016

| derived variables                             | variable name |
|-----------------------------------------------|---------------|
| rss 01 bas-saint-laurent mental health budget | rss_01_mh_3   |
| rss 01 bas-saint-laurent mental health budget | rss_01_mh_6   |
| rss 01 bas-saint-laurent mental health budget | rss_01_mh_12  |

|    |                                                          |              |
|----|----------------------------------------------------------|--------------|
| 1  |                                                          |              |
| 2  |                                                          |              |
| 3  |                                                          |              |
| 4  | rss 01 bas-saint-laurent mental health budget            | rss_01_mh_24 |
| 5  | rss 01 bas-saint-laurent mental health budget            | rss_01_mh_36 |
| 6  | rss 01 bas-saint-laurent mental health budget            | rss_01_mh_48 |
| 7  | rss 01 bas-saint-laurent mental health budget            | rss_01_mh_60 |
| 8  |                                                          |              |
| 9  | rss 02 saguenay-lac-saint-jean mental health budget      | rss_02_mh_3  |
| 10 | rss 02 saguenay-lac-saint-jean mental health budget      | rss_02_mh_6  |
| 11 | rss 02 saguenay-lac-saint-jean mental health budget      | rss_02_mh_12 |
| 12 | rss 02 saguenay-lac-saint-jean mental health budget      | rss_02_mh_24 |
| 13 | rss 02 saguenay-lac-saint-jean mental health budget      | rss_02_mh_36 |
| 14 | rss 02 saguenay-lac-saint-jean mental health budget      | rss_02_mh_48 |
| 15 | rss 02 saguenay-lac-saint-jean mental health budget      | rss_02_mh_60 |
| 16 |                                                          |              |
| 17 | rss 03 capitale-nationale mental health budget           | rss_03_mh_3  |
| 18 | rss 03 capitale-nationale mental health budget           | rss_03_mh_6  |
| 19 | rss 03 capitale-nationale mental health budget           | rss_03_mh_12 |
| 20 | rss 03 capitale-nationale mental health budget           | rss_03_mh_14 |
| 21 | rss 03 capitale-nationale mental health budget           | rss_03_mh_36 |
| 22 | rss 03 capitale-nationale mental health budget           | rss_03_mh_48 |
| 23 | rss 03 capitale-nationale mental health budget           | rss_03_mh_60 |
| 24 |                                                          |              |
| 25 | rss 04 mauricie et centre-du-québec mental health budget | rss_04_mh_3  |
| 26 | rss 04 mauricie et centre-du-québec mental health budget | rss_04_mh_6  |
| 27 | rss 04 mauricie et centre-du-québec mental health budget | rss_04_mh_12 |
| 28 | rss 04 mauricie et centre-du-québec mental health budget | rss_04_mh_24 |
| 29 | rss 04 mauricie et centre-du-québec mental health budget | rss_04_mh_36 |
| 30 | rss 04 mauricie et centre-du-québec mental health budget | rss_04_mh_48 |
| 31 | rss 04 mauricie et centre-du-québec mental health budget | rss_04_mh_60 |
| 32 |                                                          |              |
| 33 | rss 05 estrie mental health budget                       | rss_05_mh_3  |
| 34 | rss 05 estrie mental health budget                       | rss_05_mh_6  |
| 35 | rss 05 estrie mental health budget                       | rss_05_mh_12 |
| 36 | rss 05 estrie mental health budget                       | rss_05_mh_24 |
| 37 | rss 05 estrie mental health budget                       | rss_05_mh_36 |
| 38 | rss 05 estrie mental health budget                       | rss_05_mh_48 |
| 39 | rss 05 estrie mental health budget                       | rss_05_mh_60 |
| 40 |                                                          |              |
| 41 | rss 06 montréal mental health budget                     | rss_06_mh_3  |
| 42 | rss 06 montréal mental health budget                     | rss_06_mh_6  |
| 43 | rss 06 montréal mental health budget                     | rss_06_mh_12 |
| 44 | rss 06 montréal mental health budget                     | rss_06_mh_24 |
| 45 | rss 06 montréal mental health budget                     | rss_06_mh_36 |
| 46 | rss 06 montréal mental health budget                     | rss_06_mh_48 |
| 47 | rss 06 montréal mental health budget                     | rss_06_mh_60 |
| 48 |                                                          |              |
| 49 | rss 07 outaouais mental health budget                    | rss_07_mh_3  |
| 50 | rss 07 outaouais mental health budget                    | rss_07_mh_6  |
| 51 |                                                          |              |
| 52 |                                                          |              |
| 53 |                                                          |              |
| 54 |                                                          |              |
| 55 |                                                          |              |
| 56 |                                                          |              |
| 57 |                                                          |              |
| 58 |                                                          |              |
| 59 |                                                          |              |
| 60 |                                                          |              |

|    |                                                           |              |
|----|-----------------------------------------------------------|--------------|
| 1  |                                                           |              |
| 2  |                                                           |              |
| 3  | rss 07 outaouais mental health budget                     | rss_07_mh_12 |
| 4  | rss 07 outaouais mental health budget                     | rss_07_mh_24 |
| 5  | rss 07 outaouais mental health budget                     | rss_07_mh_36 |
| 6  | rss 07 outaouais mental health budget                     | rss_07_mh_48 |
| 7  | rss 07 outaouais mental health budget                     | rss_07_mh_60 |
| 8  | rss 07 outaouais mental health budget                     | rss_07_mh_60 |
| 9  | rss 07 outaouais mental health budget                     | rss_07_mh_60 |
| 10 | rss 08 abitibi-témiscamingue mental health budget         | rss_08_mh_3  |
| 11 | rss 08 abitibi-témiscamingue mental health budget         | rss_08_mh_6  |
| 12 | rss 08 abitibi-témiscamingue mental health budget         | rss_08_mh_12 |
| 13 | rss 08 abitibi-témiscamingue mental health budget         | rss_08_mh_24 |
| 14 | rss 08 abitibi-témiscamingue mental health budget         | rss_08_mh_24 |
| 15 | rss 08 abitibi-témiscamingue mental health budget         | rss_08_mh_36 |
| 16 | rss 08 abitibi-témiscamingue mental health budget         | rss_08_mh_48 |
| 17 | rss 08 abitibi-témiscamingue mental health budget         | rss_08_mh_48 |
| 18 | rss 08 abitibi-témiscamingue mental health budget         | rss_08_mh_60 |
| 19 | rss 08 abitibi-témiscamingue mental health budget         | rss_08_mh_60 |
| 20 | rss 09 côte-nord mental health budget                     | rss_09_mh_3  |
| 21 | rss 09 côte-nord mental health budget                     | rss_09_mh_6  |
| 22 | rss 09 côte-nord mental health budget                     | rss_09_mh_12 |
| 23 | rss 09 côte-nord mental health budget                     | rss_09_mh_24 |
| 24 | rss 09 côte-nord mental health budget                     | rss_09_mh_24 |
| 25 | rss 09 côte-nord mental health budget                     | rss_09_mh_36 |
| 26 | rss 09 côte-nord mental health budget                     | rss_09_mh_48 |
| 27 | rss 09 côte-nord mental health budget                     | rss_09_mh_48 |
| 28 | rss 09 côte-nord mental health budget                     | rss_09_mh_60 |
| 29 | rss 09 côte-nord mental health budget                     | rss_09_mh_60 |
| 30 | rss 10 nord-du-québec mental health budget                | rss_10_mh_3  |
| 31 | rss 10 nord-du-québec mental health budget                | rss_10_mh_6  |
| 32 | rss 10 nord-du-québec mental health budget                | rss_10_mh_12 |
| 33 | rss 10 nord-du-québec mental health budget                | rss_10_mh_24 |
| 34 | rss 10 nord-du-québec mental health budget                | rss_10_mh_24 |
| 35 | rss 10 nord-du-québec mental health budget                | rss_10_mh_36 |
| 36 | rss 10 nord-du-québec mental health budget                | rss_10_mh_48 |
| 37 | rss 10 nord-du-québec mental health budget                | rss_10_mh_48 |
| 38 | rss 10 nord-du-québec mental health budget                | rss_10_mh_60 |
| 39 | rss 10 nord-du-québec mental health budget                | rss_10_mh_60 |
| 40 | rss 11 gaspésie-îles-de-la-madeleine mental health budget | rss_11_mh_3  |
| 41 | rss 11 gaspésie-îles-de-la-madeleine mental health budget | rss_11_mh_6  |
| 42 | rss 11 gaspésie-îles-de-la-madeleine mental health budget | rss_11_mh_12 |
| 43 | rss 11 gaspésie-îles-de-la-madeleine mental health budget | rss_11_mh_24 |
| 44 | rss 11 gaspésie-îles-de-la-madeleine mental health budget | rss_11_mh_24 |
| 45 | rss 11 gaspésie-îles-de-la-madeleine mental health budget | rss_11_mh_36 |
| 46 | rss 11 gaspésie-îles-de-la-madeleine mental health budget | rss_11_mh_48 |
| 47 | rss 11 gaspésie-îles-de-la-madeleine mental health budget | rss_11_mh_48 |
| 48 | rss 11 gaspésie-îles-de-la-madeleine mental health budget | rss_11_mh_60 |
| 49 | rss 11 gaspésie-îles-de-la-madeleine mental health budget | rss_11_mh_60 |
| 50 | rss 12 chaudière-appalaches mental health budget          | rss_12_mh_3  |
| 51 | rss 12 chaudière-appalaches mental health budget          | rss_12_mh_6  |
| 52 | rss 12 chaudière-appalaches mental health budget          | rss_12_mh_12 |
| 53 | rss 12 chaudière-appalaches mental health budget          | rss_12_mh_24 |
| 54 | rss 12 chaudière-appalaches mental health budget          | rss_12_mh_24 |
| 55 | rss 12 chaudière-appalaches mental health budget          | rss_12_mh_36 |
| 56 | rss 12 chaudière-appalaches mental health budget          | rss_12_mh_48 |
| 57 | rss 12 chaudière-appalaches mental health budget          | rss_12_mh_48 |
| 58 | rss 12 chaudière-appalaches mental health budget          | rss_12_mh_60 |
| 59 | rss 12 chaudière-appalaches mental health budget          | rss_12_mh_60 |
| 60 | rss 13 laval mental health budget                         | rss_13_mh_3  |

|    |                                                  |              |
|----|--------------------------------------------------|--------------|
| 1  |                                                  |              |
| 2  |                                                  |              |
| 3  |                                                  |              |
| 4  | rss 13 laval mental health budget                | rss_13_mh_6  |
| 5  | rss 13 laval mental health budget                | rss_13_mh_12 |
| 6  | rss 13 laval mental health budget                | rss_13_mh_24 |
| 7  | rss 13 laval mental health budget                | rss_13_mh_36 |
| 8  | rss 13 laval mental health budget                | rss_13_mh_48 |
| 9  |                                                  |              |
| 10 | rss 13 laval mental health budget                | rss_13_mh_60 |
| 11 | rss 14 lanaudière mental health budget           | rss_14_mh_3  |
| 12 | rss 14 lanaudière mental health budget           | rss_14_mh_6  |
| 13 | rss 14 lanaudière mental health budget           | rss_14_mh_12 |
| 14 | rss 14 lanaudière mental health budget           | rss_14_mh_24 |
| 15 | rss 14 lanaudière mental health budget           | rss_14_mh_36 |
| 16 | rss 14 lanaudière mental health budget           | rss_14_mh_48 |
| 17 | rss 14 lanaudière mental health budget           | rss_14_mh_60 |
| 18 |                                                  |              |
| 19 | rss 15 laurentides mental health budget          | rss_15_mh_3  |
| 20 | rss 15 laurentides mental health budget          | rss_15_mh_6  |
| 21 | rss 15 laurentides mental health budget          | rss_15_mh_12 |
| 22 | rss 15 laurentides mental health budget          | rss_15_mh_24 |
| 23 | rss 15 laurentides mental health budget          | rss_15_mh_36 |
| 24 | rss 15 laurentides mental health budget          | rss_15_mh_48 |
| 25 | rss 15 laurentides mental health budget          | rss_15_mh_60 |
| 26 |                                                  |              |
| 27 | rss 16 montérégie mental health budget           | rss_16_mh_3  |
| 28 | rss 16 montérégie mental health budget           | rss_16_mh_6  |
| 29 | rss 16 montérégie mental health budget           | rss_16_mh_12 |
| 30 | rss 16 montérégie mental health budget           | rss_16_mh_24 |
| 31 | rss 16 montérégie mental health budget           | rss_16_mh_36 |
| 32 | rss 16 montérégie mental health budget           | rss_16_mh_48 |
| 33 | rss 16 montérégie mental health budget           | rss_16_mh_60 |
| 34 |                                                  |              |
| 35 | rss 01 bas-saint-laurent addictions budget       | rss_01_a_3   |
| 36 | rss 01 bas-saint-laurent addictions budget       | rss_01_a_6   |
| 37 | rss 01 bas-saint-laurent addictions budget       | rss_01_a_12  |
| 38 | rss 01 bas-saint-laurent addictions budget       | rss_01_a_24  |
| 39 | rss 01 bas-saint-laurent addictions budget       | rss_01_a_36  |
| 40 | rss 01 bas-saint-laurent addictions budget       | rss_01_a_48  |
| 41 | rss 01 bas-saint-laurent addictions budget       | rss_01_a_60  |
| 42 |                                                  |              |
| 43 | rss 02 saguenay-lac-saint-jean addictions budget | rss_02_a_3   |
| 44 | rss 02 saguenay-lac-saint-jean addictions budget | rss_02_a_6   |
| 45 | rss 02 saguenay-lac-saint-jean addictions budget | rss_02_a_12  |
| 46 | rss 02 saguenay-lac-saint-jean addictions budget | rss_02_a_24  |
| 47 | rss 02 saguenay-lac-saint-jean addictions budget | rss_02_a_36  |
| 48 | rss 02 saguenay-lac-saint-jean addictions budget | rss_02_a_48  |
| 49 | rss 02 saguenay-lac-saint-jean addictions budget | rss_02_a_60  |
| 50 |                                                  |              |
| 51 |                                                  |              |
| 52 |                                                  |              |
| 53 |                                                  |              |
| 54 |                                                  |              |
| 55 |                                                  |              |
| 56 |                                                  |              |
| 57 |                                                  |              |
| 58 |                                                  |              |
| 59 |                                                  |              |
| 60 |                                                  |              |

|    |                                                       |             |
|----|-------------------------------------------------------|-------------|
| 1  |                                                       |             |
| 2  |                                                       |             |
| 3  |                                                       |             |
| 4  | rss 03 capitale-nationale addictions budget           | rss_03_a_3  |
| 5  | rss 03 capitale-nationale addictions budget           | rss_03_a_6  |
| 6  | rss 03 capitale-nationale addictions budget           | rss_03_a_12 |
| 7  | rss 03 capitale-nationale addictions budget           | rss_03_a_24 |
| 8  | rss 03 capitale-nationale addictions budget           | rss_03_a_36 |
| 9  | rss 03 capitale-nationale addictions budget           | rss_03_a_48 |
| 10 | rss 03 capitale-nationale addictions budget           | rss_03_a_60 |
| 11 | rss 03 capitale-nationale addictions budget           | rss_03_a_60 |
| 12 | rss 04 mauricie et centre-du-québec addictions budget | rss_04_a_3  |
| 13 | rss 04 mauricie et centre-du-québec addictions budget | rss_04_a_6  |
| 14 | rss 04 mauricie et centre-du-québec addictions budget | rss_04_a_12 |
| 15 | rss 04 mauricie et centre-du-québec addictions budget | rss_04_a_24 |
| 16 | rss 04 mauricie et centre-du-québec addictions budget | rss_04_a_36 |
| 17 | rss 04 mauricie et centre-du-québec addictions budget | rss_04_a_48 |
| 18 | rss 04 mauricie et centre-du-québec addictions budget | rss_04_a_60 |
| 19 | rss 04 mauricie et centre-du-québec addictions budget | rss_04_a_60 |
| 20 | rss 05 estrie addictions budget                       | rss_05_a_3  |
| 21 | rss 05 estrie addictions budget                       | rss_05_a_6  |
| 22 | rss 05 estrie addictions budget                       | rss_05_a_12 |
| 23 | rss 05 estrie addictions budget                       | rss_05_a_24 |
| 24 | rss 05 estrie addictions budget                       | rss_05_a_36 |
| 25 | rss 05 estrie addictions budget                       | rss_05_a_48 |
| 26 | rss 05 estrie addictions budget                       | rss_05_a_60 |
| 27 | rss 05 estrie addictions budget                       | rss_05_a_60 |
| 28 | rss 06 montréal addictions budget                     | rss_06_a_3  |
| 29 | rss 06 montréal addictions budget                     | rss_06_a_6  |
| 30 | rss 06 montréal addictions budget                     | rss_06_a_12 |
| 31 | rss 06 montréal addictions budget                     | rss_06_a_24 |
| 32 | rss 06 montréal addictions budget                     | rss_06_a_36 |
| 33 | rss 06 montréal addictions budget                     | rss_06_a_48 |
| 34 | rss 06 montréal addictions budget                     | rss_06_a_60 |
| 35 | rss 06 montréal addictions budget                     | rss_06_a_60 |
| 36 | rss 07 outaouais addictions budget                    | rss_07_a_3  |
| 37 | rss 07 outaouais addictions budget                    | rss_07_a_6  |
| 38 | rss 07 outaouais addictions budget                    | rss_07_a_12 |
| 39 | rss 07 outaouais addictions budget                    | rss_07_a_24 |
| 40 | rss 07 outaouais addictions budget                    | rss_07_a_36 |
| 41 | rss 07 outaouais addictions budget                    | rss_07_a_48 |
| 42 | rss 07 outaouais addictions budget                    | rss_07_a_60 |
| 43 | rss 07 outaouais addictions budget                    | rss_07_a_60 |
| 44 | rss 08 abitibi-témiscamingue addictions budget        | rss_08_a_3  |
| 45 | rss 08 abitibi-témiscamingue addictions budget        | rss_08_a_6  |
| 46 | rss 08 abitibi-témiscamingue addictions budget        | rss_08_a_12 |
| 47 | rss 08 abitibi-témiscamingue addictions budget        | rss_08_a_24 |
| 48 | rss 08 abitibi-témiscamingue addictions budget        | rss_08_a_36 |
| 49 | rss 08 abitibi-témiscamingue addictions budget        | rss_08_a_48 |
| 50 | rss 08 abitibi-témiscamingue addictions budget        | rss_08_a_48 |
| 51 |                                                       |             |
| 52 |                                                       |             |
| 53 |                                                       |             |
| 54 |                                                       |             |
| 55 |                                                       |             |
| 56 |                                                       |             |
| 57 |                                                       |             |
| 58 |                                                       |             |
| 59 |                                                       |             |
| 60 |                                                       |             |



|    |                                                         |             |
|----|---------------------------------------------------------|-------------|
| 1  |                                                         |             |
| 2  |                                                         |             |
| 3  |                                                         |             |
| 4  | rss 08 abitibi-témiscamingue addictions budget          | rss_08_a_60 |
| 5  | rss 09 côte-nord addictions budget                      | rss_09_a_3  |
| 6  | rss 09 côte-nord addictions budget                      | rss_09_a_6  |
| 7  | rss 09 côte-nord addictions budget                      | rss_09_a_12 |
| 8  | rss 09 côte-nord addictions budget                      | rss_09_a_24 |
| 9  |                                                         |             |
| 10 | rss 09 côte-nord addictions budget                      | rss_09_a_36 |
| 11 | rss 09 côte-nord addictions budget                      | rss_09_a_48 |
| 12 | rss 09 côte-nord addictions budget                      | rss_09_a_60 |
| 13 |                                                         |             |
| 14 | rss 10 nord-du-québec addictions budget                 | rss_10_a_3  |
| 15 | rss 10 nord-du-québec addictions budget                 | rss_10_a_6  |
| 16 | rss 10 nord-du-québec addictions budget                 | rss_10_a_12 |
| 17 | rss 10 nord-du-québec addictions budget                 | rss_10_a_24 |
| 18 | rss 10 nord-du-québec addictions budget                 | rss_10_a_36 |
| 19 | rss 10 nord-du-québec addictions budget                 | rss_10_a_48 |
| 20 | rss 10 nord-du-québec addictions budget                 | rss_10_a_60 |
| 21 |                                                         |             |
| 22 | rss 11 gaspésie--îles-de-la-madeleine addictions budget | rss_11_a_3  |
| 23 | rss 11 gaspésie--îles-de-la-madeleine addictions budget | rss_11_a_6  |
| 24 | rss 11 gaspésie--îles-de-la-madeleine addictions budget | rss_11_a_12 |
| 25 | rss 11 gaspésie--îles-de-la-madeleine addictions budget | rss_11_a_24 |
| 26 | rss 11 gaspésie--îles-de-la-madeleine addictions budget | rss_11_a_36 |
| 27 | rss 11 gaspésie--îles-de-la-madeleine addictions budget | rss_11_a_48 |
| 28 | rss 11 gaspésie--îles-de-la-madeleine addictions budget | rss_11_a_60 |
| 29 |                                                         |             |
| 30 | rss 12 chaudière-appalaches addictions budget           | rss_12_a_3  |
| 31 | rss 12 chaudière-appalaches addictions budget           | rss_12_a_6  |
| 32 | rss 12 chaudière-appalaches addictions budget           | rss_12_a_12 |
| 33 | rss 12 chaudière-appalaches addictions budget           | rss_12_a_24 |
| 34 | rss 12 chaudière-appalaches addictions budget           | rss_12_a_36 |
| 35 | rss 12 chaudière-appalaches addictions budget           | rss_12_a_48 |
| 36 | rss 12 chaudière-appalaches addictions budget           | rss_12_a_60 |
| 37 |                                                         |             |
| 38 | rss 13 laval addictions budget                          | rss_13_a_3  |
| 39 | rss 13 laval addictions budget                          | rss_13_a_6  |
| 40 | rss 13 laval addictions budget                          | rss_13_a_12 |
| 41 | rss 13 laval addictions budget                          | rss_13_a_24 |
| 42 | rss 13 laval addictions budget                          | rss_13_a_36 |
| 43 | rss 13 laval addictions budget                          | rss_13_a_48 |
| 44 | rss 13 laval addictions budget                          | rss_13_a_60 |
| 45 |                                                         |             |
| 46 | rss 14 lanaudière addictions budget                     | rss_14_a_3  |
| 47 | rss 14 lanaudière addictions budget                     | rss_14_a_6  |
| 48 | rss 14 lanaudière addictions budget                     | rss_14_a_12 |
| 49 | rss 14 lanaudière addictions budget                     | rss_14_a_24 |
| 50 | rss 14 lanaudière addictions budget                     | rss_14_a_36 |
| 51 |                                                         |             |
| 52 |                                                         |             |
| 53 |                                                         |             |
| 54 |                                                         |             |
| 55 |                                                         |             |
| 56 |                                                         |             |
| 57 |                                                         |             |
| 58 |                                                         |             |
| 59 |                                                         |             |
| 60 |                                                         |             |

|    |                                           |                           |
|----|-------------------------------------------|---------------------------|
| 1  |                                           |                           |
| 2  |                                           |                           |
| 3  | rss 14 lanauidière addictions budget      | rss_14_a_48               |
| 4  | rss 14 lanauidière addictions budget      | rss_14_a_60               |
| 5  | rss 15 laurentides addictions budget      | rss_15_a_3                |
| 6  | rss 15 laurentides addictions budget      | rss_15_a_6                |
| 7  | rss 15 laurentides addictions budget      | rss_15_a_12               |
| 8  | rss 15 laurentides addictions budget      | rss_15_a_24               |
| 9  | rss 15 laurentides addictions budget      | rss_15_a_36               |
| 10 | rss 15 laurentides addictions budget      | rss_15_a_48               |
| 11 | rss 15 laurentides addictions budget      | rss_15_a_60               |
| 12 | rss 16 montérégie addictions budget       | rss_16_a_3                |
| 13 | rss 16 montérégie addictions budget       | rss_16_a_6                |
| 14 | rss 16 montérégie addictions budget       | rss_16_a_12               |
| 15 | rss 16 montérégie addictions budget       | rss_16_a_24               |
| 16 | rss 16 montérégie addictions budget       | rss_16_a_36               |
| 17 | rss 16 montérégie addictions budget       | rss_16_a_48               |
| 18 | rss 16 montérégie addictions budget       | rss_16_a_60               |
| 19 | regional mental health budget (\$/capita) | region_mhbudget_2018-2019 |
| 20 | regional mental health budget (\$/capita) | region_mhbudget_2017-2018 |
| 21 | regional mental health budget (\$/capita) | region_mhbudget_2016-2017 |
| 22 | regional mental health budget (\$/capita) | region_mhbudget_2015-2016 |
| 23 | regional addictions budget (\$/capita)    | region_abudget_2018-2019  |
| 24 | regional addictions budget (\$/capita)    | region_abudget_2017-2018  |
| 25 | regional addictions budget (\$/capita)    | region_abudget_2016-2017  |
| 26 | regional addictions budget (\$/capita)    | region_abudget_2015-2016  |
| 27 |                                           |                           |
| 28 |                                           |                           |
| 29 |                                           |                           |
| 30 |                                           |                           |
| 31 |                                           |                           |
| 32 |                                           |                           |
| 33 |                                           |                           |
| 34 |                                           |                           |
| 35 |                                           |                           |
| 36 |                                           |                           |
| 37 |                                           |                           |
| 38 |                                           |                           |
| 39 |                                           |                           |
| 40 |                                           |                           |
| 41 |                                           |                           |
| 42 |                                           |                           |
| 43 |                                           |                           |
| 44 |                                           |                           |
| 45 |                                           |                           |
| 46 |                                           |                           |
| 47 |                                           |                           |
| 48 |                                           |                           |
| 49 |                                           |                           |
| 50 |                                           |                           |
| 51 |                                           |                           |
| 52 |                                           |                           |
| 53 |                                           |                           |
| 54 |                                           |                           |
| 55 |                                           |                           |
| 56 |                                           |                           |
| 57 |                                           |                           |
| 58 |                                           |                           |
| 59 |                                           |                           |
| 60 |                                           |                           |

## ii. QUALITY OF CARE INDICATORS (QUALITYCARE)

- quality of anxiety or depressive disorders mental health services follow-up in primary care (continuous)
- quality of mental health services depression disorder mental health services follow-up in primary care (continuous)
- quality of substance use disorder mental health services follow-up in primary care (continuous)
- quality of mental health care services follow-up after hospitalization: readmission within 30 days (continuous)
- quality of mental health services follow-up in primary care after suicide attempt (continuous)
- quality of community mental health services (continuous)
- quality of community mental health services of patients with severe mental illness (continuous)
- quality of community mental health services of patients with common mental disorders (continuous)
- quality of community mental health services of patients with personality disorders (continuous)
- adequate use of emergency room for mental health service (continuous)

| <b>derived variables</b>                                                                                 | <b>variable name</b>   |
|----------------------------------------------------------------------------------------------------------|------------------------|
| quality of anxiety or depressive disorders mental health services follow-up in primary care (continuous) | qfu_primcare_anxdep_3  |
| quality of anxiety or depressive disorders mental health services follow-up in primary care (continuous) | qfu_primcare_anxdep_6  |
| quality of anxiety or depressive disorders mental health services follow-up in primary care (continuous) | qfu_primcare_anxdep_12 |
| quality of anxiety or depressive disorders mental health services follow-up in primary care (continuous) | qfu_primcare_anxdep_24 |
| quality of anxiety or depressive disorders mental health services follow-up in primary care (continuous) | qfu_primcare_anxdep_36 |
| quality of anxiety or depressive disorders mental health services follow-up in primary care (continuous) | qfu_primcare_anxdep_48 |
| quality of anxiety or depressive disorders mental health services follow-up in primary care (continuous) | qfu_primcare_anxdep_60 |
| quality of depression disorder mental health services follow-up in primary care (continuous)             | qfu_primcare_dep_3     |
| quality of depression disorder mental health services follow-up in primary care (continuous)             | qfu_primcare_dep_6     |
| quality of depression disorder mental health services follow-up in primary care (continuous)             | qfu_primcare_dep_12    |
| quality of depression disorder mental health services follow-up in primary care (continuous)             | qfu_primcare_dep_24    |
| quality of depression disorder mental health services follow-up in primary care (continuous)             | qfu_primcare_dep_36    |
| quality of depression disorder mental health services follow-up in primary care (continuous)             | qfu_primcare_dep_48    |
| quality of depression disorder mental health services follow-up in primary care (continuous)             | qfu_primcare_dep_60    |
| quality of substance use disorder mental health services follow-up in primary care (continuous)          | qfu_primcare_sud_3     |
| quality of substance use disorder mental health services follow-up in primary care (continuous)          | qfu_primcare_sud_6     |
| quality of substance use disorder mental health services follow-up in primary care (continuous)          | qfu_primcare_sud_12    |

|                       |                                                                                                                 |                                   |
|-----------------------|-----------------------------------------------------------------------------------------------------------------|-----------------------------------|
| 1<br>2<br>3<br>4<br>5 | quality of substance use disorder mental health services follow-up in primary care (continuous)                 | qfu_primcare_sud_24               |
| 6<br>7                | quality of substance use disorder mental health services follow-up in primary care (continuous)                 | qfu_primcare_sud_36               |
| 8<br>9<br>10          | quality of substance use disorder mental health services follow-up in primary care (continuous)                 | qfu_primcare_sud_48               |
| 11<br>12              | quality of substance use disorder mental health services follow-up in primary care (continuous)                 | qfu_primcare_sud_60               |
| 13<br>14<br>15<br>16  | quality of mental health care services follow-up after hospitalization: readmission within 30 days (continuous) | qfu_posthosp_readmit30_3          |
| 17<br>18<br>19        | quality of mental health care services follow-up after hospitalization: readmission within 30 days (continuous) | qfu_posthosp_readmit30_6          |
| 20<br>21<br>22        | quality of mental health care services follow-up after hospitalization: readmission within 30 days (continuous) | qfu_posthosp_readmit30_12         |
| 23<br>24<br>25<br>26  | quality of mental health care services follow-up after hospitalization: readmission within 30 days (continuous) | qfu_posthosp_readmit30_24         |
| 27<br>28<br>29        | quality of mental health care services follow-up after hospitalization: readmission within 30 days (continuous) | qfu_posthosp_readmit30_36         |
| 30<br>31<br>32<br>33  | quality of mental health care services follow-up after hospitalization: readmission within 30 days (continuous) | qfu_posthosp_readmit30_48         |
| 34<br>35<br>36        | quality of mental health care services follow-up after hospitalization: readmission within 30 days (continuous) | qfu_posthosp_readmit30_60         |
| 37<br>38<br>39        | quality of mental health services followup in primary care after suicide attempt (continuous)                   | qfu_primcare_postsucideattempt_3  |
| 40<br>41              | quality of mental health services followup in primary care after suicide attempt (continuous)                   | qfu_primcare_postsucideattempt_6  |
| 42<br>43<br>44        | quality of mental health services followup in primary care after suicide attempt (continuous)                   | qfu_primcare_postsucideattempt_12 |
| 45<br>46              | quality of mental health services followup in primary care after suicide attempt (continuous)                   | qfu_primcare_postsucideattempt_24 |
| 47<br>48              | quality of mental health services followup in primary care after suicide attempt (continuous)                   | qfu_primcare_postsucideattempt_36 |
| 49<br>50              | quality of mental health services followup in primary care after suicide attempt (continuous)                   | qfu_primcare_postsucideattempt_48 |
| 51<br>52              | quality of mental health services followup in primary care after suicide attempt (continuous)                   | qfu_primcare_postsucideattempt_60 |
| 53<br>54<br>55<br>56  | quality of community mental health services (continuous)                                                        | qcomserv_3                        |

|    |                                                                                                         |                    |
|----|---------------------------------------------------------------------------------------------------------|--------------------|
| 1  | quality of community mental health services<br>(continuous)                                             | qcomserv_6         |
| 2  |                                                                                                         |                    |
| 3  | quality of community mental health services<br>(continuous)                                             | qcomserv_12        |
| 4  |                                                                                                         |                    |
| 5  | quality of community mental health services<br>(continuous)                                             | qcomserv_24        |
| 6  |                                                                                                         |                    |
| 7  | quality of community mental health services<br>(continuous)                                             | qcomserv_36        |
| 8  |                                                                                                         |                    |
| 9  | quality of community mental health services<br>(continuous)                                             | qcomserv_48        |
| 10 |                                                                                                         |                    |
| 11 | quality of community mental health services<br>(continuous)                                             | qcomserv_60        |
| 12 |                                                                                                         |                    |
| 13 | quality of community mental health services of<br>patients with severe mental illness (continuous)      | qcomserv_severe_3  |
| 14 |                                                                                                         |                    |
| 15 | quality of community mental health services of<br>patients with severe mental illness (continuous)      | qcomserv_severe_6  |
| 16 |                                                                                                         |                    |
| 17 | quality of community mental health services of<br>patients with severe mental illness (continuous)      | qcomserv_severe_12 |
| 18 |                                                                                                         |                    |
| 19 | quality of community mental health services of<br>patients with severe mental illness (continuous)      | qcomserv_severe_24 |
| 20 |                                                                                                         |                    |
| 21 | quality of community mental health services of<br>patients with severe mental illness (continuous)      | qcomserv_severe_36 |
| 22 |                                                                                                         |                    |
| 23 | quality of community mental health services of<br>patients with severe mental illness (continuous)      | qcomserv_severe_48 |
| 24 |                                                                                                         |                    |
| 25 | quality of community mental health services of<br>patients with severe mental illness (continuous)      | qcomserv_severe_60 |
| 26 |                                                                                                         |                    |
| 27 | quality of community mental health services of<br>patients with common mental disorders<br>(continuous) | qcomserv_cmd_3     |
| 28 |                                                                                                         |                    |
| 29 | quality of community mental health services of<br>patients with common mental disorders<br>(continuous) | qcomserv_cmd_6     |
| 30 |                                                                                                         |                    |
| 31 | quality of community mental health services of<br>patients with common mental disorders<br>(continuous) | qcomserv_cmd_12    |
| 32 |                                                                                                         |                    |
| 33 | quality of community mental health services of<br>patients with common mental disorders<br>(continuous) | qcomserv_cmd_24    |
| 34 |                                                                                                         |                    |
| 35 | quality of community mental health services of<br>patients with common mental disorders<br>(continuous) | qcomserv_cmd_36    |
| 36 |                                                                                                         |                    |
| 37 | quality of community mental health services of<br>patients with common mental disorders<br>(continuous) | qcomserv_cmd_48    |
| 38 |                                                                                                         |                    |
| 39 | quality of community mental health services of<br>patients with common mental disorders<br>(continuous) |                    |
| 40 |                                                                                                         |                    |
| 41 |                                                                                                         |                    |
| 42 |                                                                                                         |                    |
| 43 |                                                                                                         |                    |
| 44 |                                                                                                         |                    |
| 45 |                                                                                                         |                    |
| 46 |                                                                                                         |                    |
| 47 |                                                                                                         |                    |
| 48 |                                                                                                         |                    |
| 49 |                                                                                                         |                    |
| 50 |                                                                                                         |                    |
| 51 |                                                                                                         |                    |
| 52 |                                                                                                         |                    |
| 53 |                                                                                                         |                    |
| 54 |                                                                                                         |                    |
| 55 |                                                                                                         |                    |
| 56 |                                                                                                         |                    |
| 57 |                                                                                                         |                    |
| 58 |                                                                                                         |                    |
| 59 |                                                                                                         |                    |
| 60 |                                                                                                         |                    |

|                                                                                                   |                 |
|---------------------------------------------------------------------------------------------------|-----------------|
| quality of community mental health services of patients with common mental disorders (continuous) | qcomserv_cmd_60 |
| quality of community mental health services of patients with personality disorders (continuous)   | qcomserv_pd_3   |
| quality of community mental health services of patients with personality disorders (continuous)   | qcomserv_pd_6   |
| quality of community mental health services of patients with personality disorders (continuous)   | qcomserv_pd_12  |
| quality of community mental health services of patients with personality disorders (continuous)   | qcomserv_pd_24  |
| quality of community mental health services of patients with personality disorders (continuous)   | qcomserv_pd_36  |
| quality of community mental health services of patients with personality disorders (continuous)   | qcomserv_pd_48  |
| quality of community mental health services of patients with personality disorders (continuous)   | qcomserv_pd_60  |
| adequate use of emergency room for mental health service (continuous)                             | aduse_er_3      |
| adequate use of emergency room for mental health service (continuous)                             | aduse_er_6      |
| adequate use of emergency room for mental health service (continuous)                             | aduse_er_12     |
| adequate use of emergency room for mental health service (continuous)                             | aduse_er_24     |
| adequate use of emergency room for mental health service (continuous)                             | aduse_er_36     |
| adequate use of emergency room for mental health service (continuous)                             | aduse_er_48     |
| adequate use of emergency room for mental health service (continuous)                             | aduse_er_60     |

## APPENDIX A: CLASSES\_MEDICAMENTS\_CAROLINE SIROIS 30

### AVRIL.XLSX

#### Mental health medication

| Psychotropic medications |           |             |                           |  |  |  |
|--------------------------|-----------|-------------|---------------------------|--|--|--|
| Group                    | Sub-group | Medications | Common denomination codes |  |  |  |
|                          |           |             |                           |  |  |  |

| Antipsychotics |          |                   |       |                                        |  |
|----------------|----------|-------------------|-------|----------------------------------------|--|
|                | Typical  |                   |       |                                        |  |
|                |          | Chlopromazine     | 1924  |                                        |  |
|                |          | Flupenthixol      | 41863 |                                        |  |
|                |          |                   | 43202 |                                        |  |
|                |          | Fluphenazine      | 4056  |                                        |  |
|                |          |                   | 4069  |                                        |  |
|                |          |                   | 34284 |                                        |  |
|                |          | Haloperidol       | 4394  |                                        |  |
|                |          |                   | 43540 |                                        |  |
|                |          |                   | 43826 |                                        |  |
|                |          |                   | 46292 |                                        |  |
|                |          | Loxapine          | 34219 |                                        |  |
|                |          |                   | 37612 |                                        |  |
|                |          |                   | 40745 |                                        |  |
|                |          | Methotrimeprazine | 6045  |                                        |  |
|                |          | Perphenazine      | 7176  |                                        |  |
|                |          |                   | 46011 | (In combination with<br>amitryptiline) |  |
|                |          | Pimozide          | 33465 |                                        |  |
|                |          | Pipotiazine       | 41707 |                                        |  |
|                |          | Prochlorperazine  | 45458 |                                        |  |
|                |          |                   | 45528 |                                        |  |
|                |          |                   | 8125  |                                        |  |
|                |          | Thioridazine      | 9594  |                                        |  |
|                |          | Thiopropazine     | 9568  |                                        |  |
|                |          | Trifluoperazine   | 9802  |                                        |  |
|                |          |                   | 34440 |                                        |  |
|                |          |                   | 46108 | (In combination with<br>isopropamide)  |  |
|                |          | Zuclopenthixol    | 47136 |                                        |  |
|                |          |                   | 47137 |                                        |  |
|                |          |                   | 47138 |                                        |  |
|                |          |                   |       |                                        |  |
|                |          |                   |       |                                        |  |
|                | Atypical | Asenapine         | 47921 |                                        |  |
|                |          | Aripiprazole      | 47801 |                                        |  |
|                |          | Brexpiprazole     | 48153 |                                        |  |
|                |          | Clozapine         | 45580 |                                        |  |
|                |          | Lurasidone        | 47939 |                                        |  |





|                                                                                                             |                            |                 |       |                                 |  |
|-------------------------------------------------------------------------------------------------------------|----------------------------|-----------------|-------|---------------------------------|--|
|                                                                                                             |                            | Tranlycypromine | 9698  |                                 |  |
|                                                                                                             |                            |                 |       |                                 |  |
|                                                                                                             | IRMA                       | Moclobemide     | 46427 |                                 |  |
|                                                                                                             |                            |                 | 47005 |                                 |  |
|                                                                                                             |                            |                 |       |                                 |  |
|                                                                                                             | SRI+ 5HT1a partial agonist | Vilazodone      | 48227 |                                 |  |
|                                                                                                             |                            |                 |       |                                 |  |
|                                                                                                             | Serotonin modulator        | Vortioxetine    | 48038 |                                 |  |
|                                                                                                             |                            |                 |       |                                 |  |
|                                                                                                             |                            |                 |       |                                 |  |
| <b>Other antidepressants - Those mostly used for other indications than depression or anxiety disorders</b> |                            |                 |       |                                 |  |
|                                                                                                             |                            |                 |       |                                 |  |
|                                                                                                             | Tricyclics                 | Amitryptiline   | 429   |                                 |  |
|                                                                                                             |                            |                 | 46011 | (Combination with perphenazine) |  |
|                                                                                                             |                            | Clomipramine    | 14781 |                                 |  |
|                                                                                                             |                            | Desipramine     | 2522  |                                 |  |
|                                                                                                             |                            | Doxepine        | 3198  |                                 |  |
|                                                                                                             |                            | Imipramine      | 4784  |                                 |  |
|                                                                                                             |                            | Nortriptyline   | 6578  |                                 |  |
|                                                                                                             |                            | Trimipramine    | 9906  |                                 |  |
|                                                                                                             |                            |                 |       |                                 |  |
|                                                                                                             |                            |                 |       |                                 |  |
|                                                                                                             | Inh. S recap + antag 5-HT2 | Trazodone       | 43137 |                                 |  |
|                                                                                                             |                            |                 |       |                                 |  |
|                                                                                                             |                            |                 |       |                                 |  |
| <b>Mood stabilizers (other than antipsychotics and other medications included in other classes)</b>         |                            |                 |       |                                 |  |
|                                                                                                             |                            |                 |       |                                 |  |
|                                                                                                             |                            | Carbamazepine   | 1404  |                                 |  |
|                                                                                                             |                            |                 | 10270 |                                 |  |
|                                                                                                             |                            | Gabapentin      | 46229 |                                 |  |
|                                                                                                             |                            |                 | 47100 |                                 |  |
|                                                                                                             |                            | Lamotrigine     | 47110 |                                 |  |
|                                                                                                             |                            |                 | 46248 |                                 |  |
|                                                                                                             |                            | Lithium         | 47071 |                                 |  |
|                                                                                                             |                            |                 | 47237 |                                 |  |



|                            |                           |              |       |  |
|----------------------------|---------------------------|--------------|-------|--|
|                            |                           |              | 39302 |  |
|                            |                           | Guanfacine   | 47979 |  |
|                            |                           |              |       |  |
| <b>Alzheimer's disease</b> |                           |              |       |  |
|                            | Inh. Acetylcholinesterase | Donepezil    | 47352 |  |
|                            |                           | Galantamine  | 47415 |  |
|                            |                           |              | 46767 |  |
|                            |                           | Rivastigmine | 47726 |  |
|                            |                           |              | 46673 |  |
|                            |                           |              | 47368 |  |
|                            | NMDA                      | Memantine    | 47542 |  |

## Medication classes – other

| MAIN CLASSES                   | Sub-classes that may be studied | AHFS codes or Medications |                                                  |  |  |  |                                                                   |
|--------------------------------|---------------------------------|---------------------------|--------------------------------------------------|--|--|--|-------------------------------------------------------------------|
| <b>Diabetes</b>                |                                 | AHFS sub-class            |                                                  |  |  |  |                                                                   |
|                                |                                 | 68:20                     | Antidiabetes                                     |  |  |  |                                                                   |
| <b>Cardiovascular diseases</b> |                                 |                           |                                                  |  |  |  |                                                                   |
|                                |                                 | AFHS sub-class            |                                                  |  |  |  |                                                                   |
|                                | Antithrombotics                 | 20:12                     | Antithrombotics (anticoagulants, antiplatelets)  |  |  |  | et ajouter les CODES DÉNOMINATIONS COMMUNE ASPIRINE: 143 et 46353 |
|                                | Antihypertensive agents         | 24:08                     | Antihypertensives (alpha-agonists, vasodilators) |  |  |  |                                                                   |
|                                |                                 | 24:20                     | Alpha-blockers                                   |  |  |  |                                                                   |
|                                |                                 | 24:24                     | Beta-blockers                                    |  |  |  |                                                                   |
|                                |                                 | 24:28                     | Calcium channel blockers                         |  |  |  |                                                                   |
|                                |                                 | 24:32                     | ACE inhibitors and ARBs                          |  |  |  |                                                                   |

|                                                                         |                                |                            |                                              |                           |  |                                                                  |
|-------------------------------------------------------------------------|--------------------------------|----------------------------|----------------------------------------------|---------------------------|--|------------------------------------------------------------------|
|                                                                         |                                | 40:28                      | Diuretics                                    |                           |  |                                                                  |
|                                                                         | Antiarrhythmic and cardiotonic | 24:04                      | Cardiotropic (antiarrhythmics, cardiotonics) |                           |  |                                                                  |
|                                                                         | Hypolipemians                  | 24:06                      | Hypolipemians (statins, fibrates, etc)       |                           |  |                                                                  |
|                                                                         | Vasodilators                   | 24:12                      | Nitrates and other vasodilators              |                           |  |                                                                  |
|                                                                         |                                |                            |                                              |                           |  |                                                                  |
| <b>Respiratory diseases (medications used to treat COPD and asthma)</b> |                                |                            |                                              |                           |  |                                                                  |
|                                                                         |                                | Medications                |                                              | Code denomination commune |  |                                                                  |
|                                                                         |                                | Acclidinium                |                                              | 47986                     |  |                                                                  |
|                                                                         |                                | Glycopyrronium             |                                              | 47949                     |  |                                                                  |
|                                                                         |                                | Tiotropium                 |                                              | 46856                     |  |                                                                  |
|                                                                         |                                | Uméclidinium               |                                              | 48109                     |  |                                                                  |
|                                                                         |                                | Formotérol                 |                                              | 47916                     |  |                                                                  |
|                                                                         |                                | Indacatérol                |                                              | 47923                     |  |                                                                  |
|                                                                         |                                | Salmétérol                 |                                              | 46247                     |  |                                                                  |
|                                                                         |                                |                            |                                              | 47112                     |  |                                                                  |
|                                                                         |                                | Olodatérol                 |                                              |                           |  |                                                                  |
|                                                                         |                                | Glycopyrronium/indacatérol |                                              | 48033                     |  |                                                                  |
|                                                                         |                                | Uméclidinium/vilantérol    |                                              | 48224                     |  |                                                                  |
|                                                                         |                                |                            |                                              | 48029                     |  |                                                                  |
|                                                                         |                                | Aclidinium/formotérol      |                                              |                           |  |                                                                  |
|                                                                         |                                | Tiotropium/Olodatérol      |                                              | 48064                     |  |                                                                  |
|                                                                         |                                | Budésonide/formotérol      |                                              | 47428                     |  |                                                                  |
|                                                                         |                                |                            |                                              | 46800                     |  |                                                                  |
|                                                                         |                                |                            |                                              | 47917                     |  |                                                                  |
|                                                                         |                                |                            |                                              | 47925                     |  |                                                                  |
|                                                                         |                                | Fluticasone/salmétérol     |                                              | 46597                     |  |                                                                  |
|                                                                         |                                |                            |                                              | 47335                     |  |                                                                  |
|                                                                         |                                | Fluticasone/vilantérol     |                                              | 48006                     |  |                                                                  |
|                                                                         |                                | Salbutamol                 |                                              | 10530                     |  | Exclure les codes de forme: 116, 203,435, 2262, 2088, 2117, 4147 |
|                                                                         |                                |                            |                                              | 33634                     |  |                                                                  |
|                                                                         |                                |                            |                                              | 46737                     |  |                                                                  |





|                                                                                                                 |                       |               |       |            |  |  |  |
|-----------------------------------------------------------------------------------------------------------------|-----------------------|---------------|-------|------------|--|--|--|
|                                                                                                                 |                       | Baclofene     |       | 41447      |  |  |  |
|                                                                                                                 |                       |               |       | 46337      |  |  |  |
|                                                                                                                 |                       | Orphenadrine  |       | 46094      |  |  |  |
|                                                                                                                 |                       |               |       | 46254      |  |  |  |
|                                                                                                                 |                       |               |       | 6734       |  |  |  |
|                                                                                                                 |                       |               |       |            |  |  |  |
|                                                                                                                 | <b>Contraceptives</b> | AHFS subclass | 68:12 | Anovulants |  |  |  |
|                                                                                                                 |                       |               |       |            |  |  |  |
| Not included: Glaucoma, Osteoporosis, ear/eyes/nose drugs, corticosteroids, skin medications, Parkinson disease |                       |               |       |            |  |  |  |

## APPENDIX I\_2: LIST OF THE CANDIDATE INDICATORS AT THE PROGRAMMATIC AND SYSTEM LEVELS SUPPORTED BY THE HEALTH SERVICES AND PUBLIC HEALTH LITERATURE OR PRACTICES

**TABLE 2**  
List of the candidate indicators at the programmatic and system levels supported by the health services and public health literature or practices

| Candidate indicators                                                                                  | Aim                                                                                                                      | Literature support                                                                                                                                                        | Description                                                                                                                                                                                                                       | Measure                                                                                                                                      | Data sources                                                       |
|-------------------------------------------------------------------------------------------------------|--------------------------------------------------------------------------------------------------------------------------|---------------------------------------------------------------------------------------------------------------------------------------------------------------------------|-----------------------------------------------------------------------------------------------------------------------------------------------------------------------------------------------------------------------------------|----------------------------------------------------------------------------------------------------------------------------------------------|--------------------------------------------------------------------|
| 1. Quality of anxiety or depressive disorders mental health services follow-up in primary care        | Determine adequate care for patient diagnosed with anxiety and depressive disorders in primary care                      | Based on number of physician visits by Wang, et al. <sup>44</sup> and other studies <sup>47,48</sup>                                                                      | Denominator: Individuals aged 15+ years with an anxiety or depressive disorder diagnosis by a General Practitioner (GP) in a given year<br><br>Numerator: Received ≥ 4 visits for mental health in that year                      | Prevalence of individuals 15+ years who received an anxiety or depressive disorder diagnosis with ≥ 4 visits for mental health               | QICDSS                                                             |
| 2. Quality of depression disorder mental health services follow-up in primary care                    | Determine adequate care for patient diagnosed with depression in primary care                                            | Based on number of physician visits by Wang, et al. <sup>44</sup> and other studies <sup>47,48</sup>                                                                      | Denominator: Individuals aged 15+ years with a diagnosis of depression by a General Practitioner (GP) in a given year<br><br>Numerator: Received ≥ 4 visits for mental health in that year                                        | Prevalence of individuals 15+ years who received a depression diagnosis with ≥ 4 visits for mental health                                    | QICDSS                                                             |
| 3. Quality of substance use disorder mental health services follow-up in primary care                 | Determine adequate care for patient diagnosed with substance use disorder in primary care                                | Based on 4 visits with a family physician for counseling as recommended by NICE <sup>56</sup> and the guidelines for American primary care clinicians <sup>58</sup>       | Denominator: Individuals aged 15+ years with a diagnosis of substance use disorder by a General Practitioner (GP) in a given year<br><br>Numerator: Received ≥ 4 visits for mental health in that year                            | Prevalence of individuals 15+ years who received a substance use disorder diagnosis with ≥ 4 visits for mental health                        | QICDSS                                                             |
| 4. Quality of mental health care services follow-up after hospitalization: readmission within 30 days | Determine the quality of mental specialist health care and in-hospital care                                              | Based on the work of the Canadian Institute for Health Information (CIHI) <sup>45,47,48</sup>                                                                             | Denominator: Individuals aged 15+ years admitted in a hospital with a mental health diagnosis in a given year<br><br>Numerator: Individual readmitted for mental health within 30 days of initial discharge                       | Prevalence of individuals 15+ years who were readmitted to a hospital for a mental health diagnosis within 30 days of initial discharge      | QICDSS                                                             |
| 5. Quality of mental health services follow-up in primary care after suicide attempt                  | Determine the quality of mental health care of readmission rates in the region compared to others                        | Based on the work of the Canadian Institute for Health Information (CIHI) <sup>45,47,48</sup>                                                                             | Denominator: Individuals aged 15+ years admitted to a hospital for suicide attempt in a given year<br><br>Numerator: Received ≥ 1 visit to a physician for mental health within 30 days of hospital discharge for suicide attempt | Prevalence of individuals 15+ years who received ≥ 1 visit from a physician within 30 days of initial discharge for suicide attempt          | QICDSS (linked to MedEcho for suicide attempt) <sup>40,41,50</sup> |
| 6. Quality of community mental health services                                                        | Determine the balance of the community-oriented mental health care system                                                | Based on the typologies of primary and specialist (including in-hospital care) mental health care <sup>45,46,54</sup> used in the study of suicide attempts <sup>55</sup> | Denominator: Individuals aged 15+ years with a mental health diagnosis in a given year<br><br>Numerator: Individuals with exclusively outpatient services – psychiatric or general practitioner (GP)                              | Prevalence of individuals 15+ years who received a mental health disorder diagnosis with exclusively outpatient services (psychiatric or GP) | QICDSS                                                             |
| 7. Quality of community mental health services of patients with severe mental illness                 | Determine the balance of psychiatric outpatient and primary outpatient care depending on the profiles used <sup>45</sup> | Based on the associations found for the balance between primary and specialist mental health care and suicide rates <sup>2,46,60,61</sup>                                 | Denominator: Individuals aged 15+ years with exclusively a GP or a psychiatric outpatient visit for psychotic disorder<br><br>Numerator: Number of individuals with exclusively a GP or psychiatrist outpatient visits            | Prevalence of individuals 15+ years who received a severe mental illness disorder diagnosis and used exclusively outpatient services by a GP | QICDSS                                                             |
| 8. Quality of community mental health services of patients with common mental disorders               | Determine the balance of psychiatric outpatient and primary outpatient care depending on the profiles used <sup>45</sup> | Based on the associations found for the balance between primary and specialist mental health care and suicide rates <sup>2,46,60,61</sup>                                 | Denominator: Individuals aged 15+ years with a psychiatric or a GP outpatient visit for depression<br><br>Numerator: Number of individuals with exclusively GP outpatient visits                                                  | Prevalence of individuals 15+ years who received a common mental disorder diagnosis and used exclusively outpatient services by a GP         | QICDSS                                                             |

Continued on the following page



**TABLE 2 (continued)**  
**List of the candidate indicators at the programmatic and system levels supported by the health services and public health literature or practices**

| Candidate indicators                                                                    | Aim                                                                                                                                           | Literature support                                                                                                                        | Description                                                                                                                                                                                                             | Measure                                                                                                                                  | Data sources                                                                                         |
|-----------------------------------------------------------------------------------------|-----------------------------------------------------------------------------------------------------------------------------------------------|-------------------------------------------------------------------------------------------------------------------------------------------|-------------------------------------------------------------------------------------------------------------------------------------------------------------------------------------------------------------------------|------------------------------------------------------------------------------------------------------------------------------------------|------------------------------------------------------------------------------------------------------|
| 9. Quality of community mental health services of patients with substance use disorders | Determine the balance of psychiatric outpatient and primary outpatient care depending on the profiles used <sup>5,55</sup>                    | Based on the associations found for the balance between primary and specialist mental health care and suicide rates <sup>2,46,60,61</sup> | Denominator: Individuals aged 15+ years with a psychiatric or a GP outpatient visit for substance use disorder<br><br>Numerator: Number of individuals with exclusively GP outpatient visits                            | Prevalence of individuals 15+ years who received a substance use disorder diagnosis and used exclusively outpatient services by a GP     | QICDSS                                                                                               |
| 10. Quality of community mental health services of patients with personality disorders  | Determine the balance of psychiatric outpatient and primary outpatient care depending on the profiles used <sup>5,55</sup>                    | Based on the associations found for the balance between primary and specialist mental health care and suicide rates <sup>2,46,60,61</sup> | Denominator: Individuals aged 15+ years with exclusively a GP or a psychiatric outpatient visit for personality disorder<br><br>Numerator: Number of individuals with exclusively a GP or psychiatric outpatient visits | Prevalence of individuals 15+ years who received a personality disorder diagnosis and used exclusively outpatient services by a GP       | QICDSS                                                                                               |
| 11. Adequate use of emergency room for mental health services                           | Determine the balance of utilization of emergency room (ER) for mental health reasons <sup>5,55</sup>                                         | Based on the associations found for the balance between primary and specialist mental health care and suicide rates <sup>46,60,61</sup>   | Denominator: Individuals aged 15+ years with a diagnosis of a mental health disorder<br><br>Numerator: Number of individuals with ER visits without being admitted                                                      | Prevalence of individuals 15+ years who received a diagnosis of mental health disorder with exclusively ER visits without being admitted | QICDSS                                                                                               |
| 12. Program expenditures for mental health services                                     | Determine the strength of the relationship between changes in suicide rates and expenditures for mental health (regional and provincial)      | Based on associations found between mental health budget and suicide rates <sup>21,23</sup>                                               | Refer to the Gouvernement du Québec <sup>43</sup>                                                                                                                                                                       | Dollars per capita spent on mental health programs (provincial and regional)                                                             | Annual financial reports from the Ministère de la santé et des services sociaux (MSSS) <sup>43</sup> |
| 13. Program expenditures for addiction services                                         | Determine the strength of the relationship between changes in suicide rates and expenditures for addiction services (regional and provincial) | Based on associations found between mental health budget and suicide rates <sup>21,23</sup>                                               | Refer to the Gouvernement du Québec <sup>43</sup>                                                                                                                                                                       | Dollars per capita spent on health programs for addiction services (provincial and regional)                                             | Annual financial reports from the MSSS <sup>43</sup>                                                 |

**Abbreviations:** CIHI, Canadian Institute for Health Information; ER, emergency room; GP, general practitioner; MSSS, Ministère de la santé et des services sociaux; QICDSS, Quebec Integrated Chronic Disease Surveillance System.

<sup>1</sup> Profile 1: psychiatric inpatient care; profile 2: hospital emergency room (ER); profile 3: psychiatric outpatient care; profile 4: general practitioner (GP) clinics; and profile 5: other medical specialist.
