# Supplementary material for: A case–control study on predicting population risk of suicide using health administrative data: a research protocol
Source: PubMed Central journal article supplement — BMJ Open. 2023 Feb 27;13(2):e066423. doi: 10.1136/bmjopen-2022-066423 (PMC9972456; doi:10.1136/bmjopen-2022-066423), 2023-02-27
Supplement: bmjopen-2022-066423supp001.pdf [file bmjopen-2022-066423supp001.pdf]

Supplementary file #1:

Guiding questions for qualitative interviews.

- 1) What are the currently policies and practices for suicide prevention that you know?
- 2) What are the challenges you are facing in suicide prevention at population level?
- 3) What are your views on using risk predictive tools for facilitating suicide prevention in the population? The advantages and drawbacks?
- 4) what are your thoughts about using artificial intelligence and machine learning for suicide prevention? The potential pros and cons?
- 5) From your view, how an ideal risk prediction tool should look like, that assists in your decision making?
- 6) What visualization formats you have been using, and what are the limits of these visualization methods?
- 7) What do you think of the visualization model presented to you?
