# Supplementary material for: A case–control study on predicting population risk of suicide using health administrative data: a research protocol
Source: PubMed Central journal article supplement — BMJ Open. 2023 Feb 27;13(2):e066423. doi: 10.1136/bmjopen-2022-066423 (PMC9972456; doi:10.1136/bmjopen-2022-066423), 2023-02-27
Supplement: bmjopen-2022-066423supp002.pdf [file bmjopen-2022-066423supp002.pdf]

## APPENDIX I\_1: CANDIDATE PREDICTORS

### i. PSYCHIATRIC DISORDERS DIAGNOSIS<sup>1</sup>

- Substance use disorder<sup>2</sup>
  - o Alcohol use disorder
  - o drug use disorder
- Mood disorder
  - Major depressive disorder
  - Bipolar disorder
- Anxiety disorder
- Schizophrenia
- Personality disorders
- ADHD
- Other diagnosis

| derived variables <sup>34</sup> | variable name       |
|---------------------------------|---------------------|
| Substance use disorder          | psydx_subuse_3      |
| Substance use disorder          | psydx_subuse_6      |
| Substance use disorder          | psydx_subuse_12     |
| Substance use disorder          | psydx_subuse_24     |
| Substance use disorder          | psydx_subuse_36     |
| Substance use disorder          | psydx_subuse_48     |
| Substance use disorder          | psydx_subuse_60     |
| Alcohol use disorder            | Psydx_alcoholuse_3  |
| Alcohol use disorder            | Psydx_alcoholuse_6  |
| Alcohol use disorder            | Psydx_alcoholuse_12 |
| Alcohol use disorder            | Psydx_alcoholuse_24 |
| Alcohol use disorder            | Psydx_alcoholuse_36 |
| Alcohol use disorder            | Psydx_alcoholuse_48 |
| Alcohol use disorder            | Psydx_alcoholuse_60 |
| Drug use disorder               | Psydx_druguse_3     |
| Drug use disorder               | Psydx_druguse_6     |
| Drug use disorder               | Psydx_druguse_12    |
| Drug use disorder               | Psydx_druguse_24    |
| Drug use disorder               | Psydx_druguse_36    |
| Drug use disorder               | Psydx_druguse_48    |
| Drug use disorder               | Psydx_druguse_60    |

The candidate predictors were captured using timeframes of prior 3, 6, 12, 24, 36, 48, and/or 60 months, indicated by the last digits of the variable name. For instance, "psydx\_subuse\_3" and "psydx\_subuse\_6" refer to a diagnosis of substance use disorder in the prior 3 and 6 months, respectively"

|                           |                  |
|---------------------------|------------------|
| mood disorder             | Psydx_mood_3     |
| mood disorder             | Psydx_mood_6     |
| mood disorder             | Psydx_mood_12    |
| mood disorder             | Psydx_mood_24    |
| mood disorder             | Psydx_mood_36    |
| mood disorder             | Psydx_mood_48    |
| mood disorder             | Psydx_mood_60    |
| Anxiety disorder          | psydx_anx_3      |
| Anxiety disorder          | psydx_anx_6      |
| Anxiety disorder          | psydx_anx_12     |
| Anxiety disorder          | psydx_anx_24     |
| Anxiety disorder          | psydx_anx_36     |
| Anxiety disorder          | psydx_anx_48     |
| Anxiety disorder          | psydx_anx_60     |
| Major Depressive Disorder | Psydx_dep_3      |
| Major Depressive Disorder | Psydx_dep_6      |
| Major Depressive Disorder | Psydx_dep_12     |
| Major Depressive Disorder | Psydx_dep_24     |
| Major Depressive Disorder | Psydx_dep_36     |
| Major Depressive Disorder | Psydx_dep_48     |
| Major Depressive Disorder | Psydx_dep_60     |
| Bipolar disorder          | Psydx_bipolar_3  |
| Bipolar disorder          | Psydx_bipolar_6  |
| Bipolar disorder          | Psydx_bipolar_12 |
| Bipolar disorder          | Psydx_bipolar_24 |
| Bipolar disorder          | Psydx_bipolar_36 |
| Bipolar disorder          | Psydx_bipolar_48 |
| Bipolar disorder          | Psydx_bipolar_60 |
| Schizophrenia             | psydx_scz_3      |
| Schizophrenia             | psydx_scz_6      |
| Schizophrenia             | psydx_scz_12     |
| Schizophrenia             | psydx_scz_24     |
| Schizophrenia             | psydx_scz_36     |
| Schizophrenia             | psydx_scz_48     |
| Schizophrenia             | psydx_scz_60     |
| Personality disorder      | psydx_pd_3       |
| Personality disorder      | psydx_pd_6       |
| Personality disorder      | psydx_pd_12      |
| Personality disorder      | psydx_pd_24      |
| Personality disorder      | psydx_pd_36      |
| Personality disorder      | psydx_pd_48      |

|                      |               |
|----------------------|---------------|
| Personality disorder | psydx_pd_60   |
| ADHD                 | psydx_adhd_3  |
| ADHD                 | psydx_adhd_6  |
| ADHD                 | psydx_adhd_12 |
| ADHD                 | psydx_adhd_24 |
| ADHD                 | psydx_adhd_36 |
| ADHD                 | psydx_adhd_48 |
| ADHD                 | psydx_adhd_60 |
| Other diagnosis      | psydx_otr_3   |
| Other diagnosis      | psydx_otr_6   |
| Other diagnosis      | psydx_otr_12  |
| Other diagnosis      | psydx_otr_24  |
| Other diagnosis      | psydx_otr_36  |
| Other diagnosis      | psydx_otr_48  |
| Other diagnosis      | psydx_otr_60  |

## ii. PHARMACOLOGICAL TREATMENTS FOR MENTAL HEALTH DISORDERS

- Typical antipsychotics
- Atypical antipsychotics
- Clozapine
- Antidepressant for anxiety or depression
- Antidepressants for other reasons
- Mood stabilizer
- Anxiolytic
- ADHD medication

| <b>derived variables<sup>5</sup></b> | <b>variable name</b>     |
|--------------------------------------|--------------------------|
| Typical antipsychotics               | rx_psy_antipsych_typ_3   |
| Typical antipsychotics               | rx_psy_antipsych_typ_6   |
| Typical antipsychotics               | rx_psy_antipsych_typ_12  |
| Typical antipsychotics               | rx_psy_antipsych_typ_24  |
| Typical antipsychotics               | rx_psy_antipsych_typ_36  |
| Typical antipsychotics               | rx_psy_antipsych_typ_48  |
| Typical antipsychotics               | rx_psy_antipsych_typ_60  |
| Atypical antipsychotics              | rx_psy_antipsych_atyp_3  |
| Atypical antipsychotics              | rx_psy_antipsych_atyp_6  |
| Atypical antipsychotics              | rx_psy_antipsych_atyp_12 |
| Atypical antipsychotics              | rx_psy_antipsych_atyp_24 |
| Atypical antipsychotics              | rx_psy_antipsych_atyp_36 |
| Atypical antipsychotics              | rx_psy_antipsych_atyp_48 |

|                                          |                          |
|------------------------------------------|--------------------------|
| Atypical antipsychotics                  | rx_psy_antipsych_atyp_60 |
| Clozapine                                | rx_psy_clozapine_3       |
| Clozapine                                | rx_psy_clozapine_6       |
| Clozapine                                | rx_psy_clozapine_12      |
| Clozapine                                | rx_psy_clozapine_24      |
| Clozapine                                | rx_psy_clozapine_36      |
| Clozapine                                | rx_psy_clozapine_48      |
| Clozapine                                | rx_psy_clozapine_60      |
| antidepressant for anxiety or depression | rx_psy_antidep_anxdep_3  |
| antidepressant for anxiety or depression | rx_psy_antidep_anxdep_6  |
| antidepressant for anxiety or depression | rx_psy_antidep_anxdep_12 |
| antidepressant for anxiety or depression | rx_psy_antidep_anxdep_24 |
| antidepressant for anxiety or depression | rx_psy_antidep_anxdep_36 |
| antidepressant for anxiety or depression | rx_psy_antidep_anxdep_48 |
| antidepressant for anxiety or depression | rx_psy_antidep_anxdep_60 |
| antidepressant for other reasons         | rx_psy_antidep_otr_3     |
| Antidepressant for other reasons         | rx_psy_antidep_otr_6     |
| Antidepressant for other reasons         | rx_psy_antidep_otr_12    |
| Antidepressant for other reasons         | rx_psy_antidep_otr_24    |
| Antidepressant for other reasons         | rx_psy_antidep_otr_36    |
| Antidepressant for other reasons         | rx_psy_antidep_otr_48    |
| Antidepressant for other reasons         | rx_psy_antidep_otr_60    |
| mood stabilizer                          | rx_psy_mdestb_3          |
| mood stabilizer                          | rx_psy_mdestb_6          |
| mood stabilizer                          | rx_psy_mdestb_12         |
| mood stabilizer                          | rx_psy_mdestb_24         |
| mood stabilizer                          | rx_psy_mdestb_36         |
| mood stabilizer                          | rx_psy_mdestb_48         |
| mood stabilizer                          | rx_psy_mdestb_60         |
| anxiolytics                              | rx_psy_anx_3             |
| anxiolytics                              | rx_psy_anx_6             |
| anxiolytics                              | rx_psy_anx_12            |
| anxiolytics                              | rx_psy_anx_24            |
| anxiolytics                              | rx_psy_anx_36            |
| anxiolytics                              | rx_psy_anx_48            |
| anxiolytics                              | rx_psy_anx_60            |
| ADHD medication                          | rx_psy_adhd_3            |
| ADHD medication                          | rx_psy_adhd_6            |
| ADHD medication                          | rx_psy_adhd_12           |
| ADHD medication                          | rx_psy_adhd_24           |
| ADHD medication                          | rx_psy_adhd_36           |

|                 |                |
|-----------------|----------------|
| ADHD medication | rx_psy_adhd_48 |
| ADHD medication | rx_psy_adhd_60 |

### iii. NON-PHARMACOLOGICAL TREATMENTS FOR MENTAL HEALTH DISORDERS

- duration of hospitalisations for mental health reasons (continuous, sum of days)
- number of hospitalisations for mental health reasons (continuous)
- duration of hospitalisations for suicide attempt (continuous, sum of days)
- number of hospitalisations for suicide attempt (continuous)
- Number of care center visits for mental health reasons (continuous)
- number of general practitioner visits for mental health reasons (continuous)
- number of emergency room visits for mental health reasons (continuous)
- number of outpatient psychiatrist visits (continuous)
- number of other specialist visits for mental health reasons (continuous)
- number of psychotherapy visits with a psychiatrist (continuous)
- number of psychotherapy visits with a general practitioner (continuous)
- number of psychotherapy visits with another specialist (continuous)
- Number of outpatient paediatrician visits (continuous)
- No mental health services
- number of ECT treatments received (continuous)
- Acute ECT received (dichotomous)
- Maintenance ECT received (dichotomous)

| derived variables                                      | variable name            |
|--------------------------------------------------------|--------------------------|
| Duration of hospit for suicide attempt (conti, # days) | duration_hosp_suicide_3  |
| duration of hospit for suicide attempt (conti, # days) | duration_hosp_suicide_6  |
| duration of hospit for suicide attempt (conti, # days) | duration_hosp_suicide_12 |
| duration of hospit for suicide attempt (conti, # days) | duration_hosp_suicide_24 |
| duration of hospit for suicide attempt (conti, # days) | duration_hosp_suicide_36 |
| duration of hospit for suicide attempt (conti, # days) | duration_hosp_suicide_48 |
| duration of hospit for suicide attempt (conti, # days) | duration_hosp_suicide_60 |
| # of hospit for suicide attempt (continuous)           | #_hosp_suicide_3         |
| # of hospit for suicide attempt (continuous)           | #_hosp_suicide_6         |
| # of hospit for suicide attempt (continuous)           | #_hosp_suicide_12        |
| # of hospit for suicide attempt (continuous)           | #_hosp_suicide_24        |
| # of hospit for suicide attempt (continuous)           | #_hosp_suicide_36        |
| # of hospit for suicide attempt (continuous)           | #_hosp_suicide_48        |
| # of hospit for suicide attempt (continuous)           | #_hosp_suicide_60        |
| Duration of hospit for mh reasons (conti, # of days)   | Duration_hosp_mh_3       |
| Duration of hospit for mh reasons (conti, # of days)   | Duration_hosp_mh_6       |
| Duration of hospit for mh reasons (conti, # of days)   | Duration_hosp_mh_12      |
| Duration of hospit for mh reasons (conti, # of days)   | Duration_hosp_mh_24      |
| Duration of hospit for mh reasons (conti, # of days)   | Duration_hosp_mh_36      |
| Duration of hospit for mh reasons (conti, # of days)   | Duration_hosp_mh_48      |
| Duration of hospit for mh reasons (conti, # of days)   | Duration_hosp_mh_60      |

|                                                              |                         |
|--------------------------------------------------------------|-------------------------|
| # of hospit for mh reasons (continuous)                      | #_hosp_mh_3             |
| # of hospit for mh reasons (continuous)                      | #_hosp_mh_6             |
| # of hospit for mh reasons (continuous)                      | #_hosp_mh_12            |
| # of hospit for mh reasons (continuous)                      | #_hosp_mh_24            |
| # of hospit for mh reasons (continuous)                      | #_hosp_mh_36            |
| # of hospit for mh reasons (continuous)                      | #_hosp_mh_48            |
| # of hospit for mh reasons (continuous)                      | #_hosp_mh_60            |
| # of outpatient paediatrician visits (continuous)            | #_outpat_pediatician_3  |
| # of outpatient paediatrician visits (continuous)            | #_outpat_pediatician_6  |
| # of outpatient paediatrician visits (continuous)            | #_outpat_pediatician_12 |
| # of outpatient paediatrician visits (continuous)            | #_outpat_pediatician_24 |
| # of outpatient paediatrician visits (continuous)            | #_outpat_pediatician_36 |
| # of outpatient paediatrician visits (continuous)            | #_outpat_pediatician_48 |
| # of outpatient paediatrician visits (continuous)            | #_outpat_pediatician_60 |
| Number of Care center for mental health reasons (continuous) | #_Carectr_mh_3          |
| Number of Care center for mental health reasons (continuous) | #_Carectr_mh_6          |
| Number of Care center for mental health reasons (continuous) | #_Carectr_mh_12         |
| Number of Care center for mental health reasons (continuous) | #_Carectr_mh_24         |
| Number of Care center for mental health reasons (continuous) | #_Carectr_mh_36         |
| Number of Care center for mental health reasons (continuous) | #_Carectr_mh_48         |
| Number of Care center for mental health reasons (continuous) | #_Carectr_mh_60         |
| # of emergency visits for mh reasons (continuous)            | #_ER_mh_3               |
| # of emergency visits for mh reasons (continuous)            | #_ER_mh_6               |
| # of emergency visits for mh reasons (continuous)            | #_ER_mh_12              |
| # of emergency visits for mh reasons (continuous)            | #_ER_mh_24              |
| # of emergency visits for mh reasons (continuous)            | #_ER_mh_36              |
| # of emergency visits for mh reasons (continuous)            | #_ER_mh_48              |
| # of emergency visits for mh reasons (continuous)            | #_ER_mh_60              |
| # of GP visits for mh reasons (continuous)                   | #_gp_mh_3               |
| # of GP visits for mh reasons (continuous)                   | #_gp_mh_6               |
| # of GP visits for mh reasons (continuous)                   | #_gp_mh_12              |
| # of GP visits for mh reasons (continuous)                   | #_gp_mh_24              |
| # of GP visits for mh reasons (continuous)                   | #_gp_mh_36              |
| # of GP visits for mh reasons (continuous)                   | #_gp_mh_48              |
| # of GP visits for mh reasons (continuous)                   | #_gp_mh_60              |
| # of outpatient psychiatrist visits (continuous)             | #_psy_mh_3              |
| # of outpatient psychiatrist visits (continuous)             | #_psy_mh_6              |
| # of outpatient psychiatrist visits (continuous)             | #_psy_mh_12             |
| # of outpatient psychiatrist visits (continuous)             | #_psy_mh_24             |
| # of outpatient psychiatrist visits (continuous)             | #_psy_mh_36             |
| # of outpatient psychiatrist visits (continuous)             | #_psy_mh_48             |

|                                                         |                     |
|---------------------------------------------------------|---------------------|
| # of outpatient psychiatrist visits (continuous)        | #_psy_mh_60         |
| # of psychotherapy visits with a psychiatrist (conti)   | #_psychotx_psy_3    |
| # of psychotherapy visits with a psychiatrist (conti)   | #_psychotx_psy_6    |
| # of psychotherapy visits with a psychiatrist (conti)   | #_psychotx_psy_12   |
| # of psychotherapy visits with a psychiatrist (conti)   | #_psychotx_psy_24   |
| # of psychotherapy visits with a psychiatrist (conti)   | #_psychotx_psy_36   |
| # of psychotherapy visits with a psychiatrist (conti)   | #_psychotx_psy_48   |
| # of psychotherapy visits with a psychiatrist (conti)   | #_psychotx_psy_60   |
| # of other specialist visits for mh reasons (conti)     | #_spc_mh_3          |
| # of other specialist visits for mh reasons (conti)     | #_spc_mh_6          |
| # of other specialist visits for mh reasons (conti)     | #_spc_mh_12         |
| # of other specialist visits for mh reasons (conti)     | #_spc_mh_24         |
| # of other specialist visits for mh reasons (conti)     | #_spc_mh_36         |
| # of other specialist visits for mh reasons (conti)     | #_spc_mh_48         |
| # of other specialist visits for mh reasons (conti)     | #_spc_mh_60         |
| # of psychotherapy visits with a GP (conti)             | #_psychotx_gp_3     |
| # of psychotherapy visits with a GP (conti)             | #_psychotx_gp_6     |
| # of psychotherapy visits with a GP (conti)             | #_psychotx_gp_12    |
| # of psychotherapy visits with a GP (conti)             | #_psychotx_gp_24    |
| # of psychotherapy visits with a GP (conti)             | #_psychotx_gp_36    |
| # of psychotherapy visits with a GP (conti)             | #_psychotx_gp_48    |
| # of psychotherapy visits with a GP (conti)             | #_psychotx_gp_60    |
| # of psychotherapy visits with other specialist (conti) | #_psychotx_other_3  |
| # of psychotherapy visits with other specialist (conti) | #_psychotx_other_6  |
| # of psychotherapy visits with other specialist (conti) | #_psychotx_other_12 |
| # of psychotherapy visits with other specialist (conti) | #_psychotx_other_24 |
| # of psychotherapy visits with other specialist (conti) | #_psychotx_other_36 |
| # of psychotherapy visits with other specialist (conti) | #_psychotx_other_48 |
| # of psychotherapy visits with other specialist (conti) | #_psychotx_other_60 |
| No mental health services                               | No_mh_services_3    |
| No mental health services                               | No_mh_services_6    |
| No mental health services                               | No_mh_services_12   |
| No mental health services                               | No_mh_services_24   |
| No mental health services                               | No_mh_services_36   |
| No mental health services                               | No_mh_services_48   |
| No mental health services                               | No_mh_services_60   |
| number of ECT received (continuous)                     | ECT_#_3             |
| number of ECT received (continuous)                     | ECT_#_6             |
| number of ECT received (continuous)                     | ECT_#_12            |
| number of ECT received (continuous)                     | ECT_#_24            |
| number of ECT received (continuous)                     | ECT_#_36            |

|                                     |                    |
|-------------------------------------|--------------------|
| number of ECT received (continuous) | ECT_#_48           |
| number of ECT received (continuous) | ECT_#_60           |
| acute ECT (dichotomous)             | ECT_acute_3        |
| acute ECT (dichotomous)             | ECT_acute_6        |
| acute ECT (dichotomous)             | ECT_acute_12       |
| acute ECT (dichotomous)             | ECT_acute_24       |
| acute ECT (dichotomous)             | ECT_acute_36       |
| acute ECT (dichotomous)             | ECT_acute_48       |
| acute ECT (dichotomous)             | ECT_acute_60       |
| Maintenance ECT (dichotomous)       | ECT_maintenance_3  |
| Maintenance ECT (dichotomous)       | ECT_maintenance_6  |
| Maintenance ECT (dichotomous)       | ECT_maintenance_12 |
| Maintenance ECT (dichotomous)       | ECT_maintenance_24 |
| Maintenance ECT (dichotomous)       | ECT_maintenance_36 |
| Maintenance ECT (dichotomous)       | ECT_maintenance_48 |
| Maintenance ECT (dichotomous)       | ECT_maintenance_60 |

#### iv. PHYSICAL DIAGNOSIS

- Dementia
- Neurological disease
- Endocrine system disorder
- Trauma
- Respiratory disorder
- Infectious disease
- Digestive disorder
- Cardiovascular disorder
- Cancer
- Other physical disorder
- Charlson/elixhauser index with psy (continuous)<sup>6</sup>
- Charlson/elixhauser index without psy (continuous)

| derived variables    | variable name  |
|----------------------|----------------|
| dementia             | physdx_dem_3   |
| dementia             | physdx_dem_6   |
| dementia             | physdx_dem_12  |
| dementia             | physdx_dem_24  |
| dementia             | physdx_dem_36  |
| dementia             | physdx_dem_48  |
| dementia             | physdx_dem_60  |
| neurological disease | physdx_neuro_3 |
| neurological disease | physdx_neuro_6 |



|                           |                  |
|---------------------------|------------------|
| neurological disease      | physdx_neuro_12  |
| neurological disease      | physdx_neuro_24  |
| neurological disease      | physdx_neuro_36  |
| neurological disease      | physdx_neuro_48  |
| neurological disease      | physdx_neuro_60  |
| endocrine system disorder | physdx_endo_3    |
| endocrine system disorder | physdx_endo_6    |
| endocrine system disorder | physdx_endo_12   |
| endocrine system disorder | physdx_endo_24   |
| endocrine system disorder | physdx_endo_36   |
| endocrine system disorder | physdx_endo_48   |
| endocrine system disorder | physdx_endo_60   |
| trauma                    | physdx_trauma_3  |
| trauma                    | physdx_trauma_6  |
| trauma                    | physdx_trauma_12 |
| trauma                    | physdx_trauma_24 |
| trauma                    | physdx_trauma_36 |
| trauma                    | physdx_trauma_48 |
| trauma                    | physdx_trauma_60 |
| respiratory disorder      | physdx_resp_3    |
| respiratory disorder      | physdx_resp_6    |
| respiratory disorder      | physdx_resp_12   |
| respiratory disorder      | physdx_resp_24   |
| respiratory disorder      | physdx_resp_36   |
| respiratory disorder      | physdx_resp_48   |
| respiratory disorder      | physdx_resp_60   |
| infectious disease        | physdx_infec_3   |
| infectious disease        | physdx_infec_6   |
| infectious disease        | physdx_infec_12  |
| infectious disease        | physdx_infec_24  |
| infectious disease        | physdx_infec_36  |
| infectious disease        | physdx_infec_48  |
| infectious disease        | physdx_infec_60  |
| digestive disorder        | physdx_diges_3   |
| digestive disorder        | physdx_diges_6   |
| digestive disorder        | physdx_diges_12  |
| digestive disorder        | physdx_diges_24  |
| digestive disorder        | physdx_diges_36  |
| digestive disorder        | physdx_diges_48  |
| digestive disorder        | physdx_diges_60  |
| cardiovascular disorder   | physdx_cvd_3     |

|                                               |                                  |
|-----------------------------------------------|----------------------------------|
| cardiovascular disorder                       | physdx_cvd_6                     |
| cardiovascular disorder                       | physdx_cvd_12                    |
| cardiovascular disorder                       | physdx_cvd_24                    |
| cardiovascular disorder                       | physdx_cvd_36                    |
| cardiovascular disorder                       | physdx_cvd_48                    |
| cardiovascular disorder                       | physdx_cvd_60                    |
| cancer                                        | physdx_cncr_3                    |
| cancer                                        | physdx_cncr_6                    |
| cancer                                        | physdx_cncr_12                   |
| cancer                                        | physdx_cncr_24                   |
| cancer                                        | physdx_cncr_36                   |
| cancer                                        | physdx_cncr_48                   |
| cancer                                        | physdx_cncr_60                   |
| other physical disorders                      | physdx_otr_3                     |
| other physical disorders                      | physdx_otr_6                     |
| other physical disorders                      | physdx_otr_12                    |
| other physical disorders                      | physdx_otr_24                    |
| other physical disorders                      | physdx_otr_36                    |
| other physical disorders                      | physdx_otr_48                    |
| other physical disorders                      | physdx_otr_60                    |
| charlson/elixhauser index with psy (conti)    | physdx_comorbidity_withpsy_3     |
| charlson/elixhauser index with psy (conti)    | physdx_comorbid_withpsy_6        |
| charlson/elixhauser index with psy (conti)    | physdx_comorbidity_withpsy_12    |
| charlson/elixhauser index with psy (conti)    | physdx_comorbidity_withpsy_24    |
| charlson/elixhauser index with psy (conti)    | physdx_comorbidity_withpsy_36    |
| charlson/elixhauser index with psy (conti)    | physdx_comorbidity_withpsy_48    |
| charlson/elixhauser index with psy (conti)    | physdx_comorbidity_withpsy_60    |
| charlson/elixhauser index without psy (conti) | physdx_comorbidity_withoutpsy_3  |
| charlson/elixhauser index without psy (conti) | physdx_comorbid_withoutpsy_6     |
| charlson/elixhauser index without psy (conti) | physdx_comorbidity_withoutpsy_12 |
| charlson/elixhauser index without psy (conti) | physdx_comorbidity_withoutpsy_24 |
| charlson/elixhauser index without psy (conti) | physdx_comorbidity_withoutpsy_36 |

|                                               |                                  |
|-----------------------------------------------|----------------------------------|
| charlson/elixhauser index without psy (conti) | physdx_comorbidity_withoutpsy_48 |
| charlson/elixhauser index without psy (conti) | physdx_comorbidity_withoutpsy_60 |

#### V. PHARMACOLOGICAL TREATMENTS FOR PHYSICAL HEALTH DISORDERS

- Medication for diabetes
- Medication for cardiovascular disease
- Medication for respiratory diseases
- Medication for gastro-intestinal disorder
- Anti-infective agent
- Pain medication
- Contraceptive
- Other medication

| derived variables                         | variable name       |
|-------------------------------------------|---------------------|
| medication for diabetes                   | rx_phys_diabetes_3  |
| medication for diabetes                   | rx_phys_diabetes_6  |
| medication for diabetes                   | rx_phys_diabetes_12 |
| medication for diabetes                   | rx_phys_diabetes_24 |
| medication for diabetes                   | rx_phys_diabetes_36 |
| medication for diabetes                   | rx_phys_diabetes_48 |
| medication for diabetes                   | rx_phys_diabetes_60 |
| medication for cardiovascular disease     | rx_phys_cvd_3       |
| medication for cardiovascular disease     | rx_phys_cvd_6       |
| medication for cardiovascular disease     | rx_phys_cvd_12      |
| medication for cardiovascular disease     | rx_phys_cvd_24      |
| medication for cardiovascular disease     | rx_phys_cvd_36      |
| medication for cardiovascular disease     | rx_phys_cvd_48      |
| medication for cardiovascular disease     | rx_phys_cvd_60      |
| medication for respiratory disease        | rx_phys_resp_3      |
| medication for respiratory disease        | rx_phys_resp_6      |
| medication for respiratory disease        | rx_phys_resp_12     |
| medication for respiratory disease        | rx_phys_resp_24     |
| medication for respiratory disease        | rx_phys_resp_36     |
| medication for respiratory disease        | rx_phys_resp_48     |
| medication for respiratory disease        | rx_phys_resp_60     |
| medication for gastro-intestinal disorder | rx_phys_gi_3        |
| medication for gastro-intestinal disorder | rx_phys_gi_6        |
| medication for gastro-intestinal disorder | rx_phys_gi_12       |
| medication for gastro-intestinal disorder | rx_phys_gi_24       |
| medication for gastro-intestinal disorder | rx_phys_gi_36       |
| medication for gastro-intestinal disorder | rx_phys_gi_48       |

|                                           |                      |
|-------------------------------------------|----------------------|
| medication for gastro-intestinal disorder | rx_phys_gi_60        |
| anti-infective agents                     | rx_phys_antiinfec_3  |
| anti-infective agents                     | rx_phys_antiinfec_6  |
| anti-infective agents                     | rx_phys_antiinfec_12 |
| anti-infective agents                     | rx_phys_antiinfec_24 |
| anti-infective agents                     | rx_phys_antiinfec_36 |
| anti-infective agents                     | rx_phys_antiinfec_48 |
| anti-infective agents                     | rx_phys_antiinfec_60 |
| pain medication                           | rx_phys_pain_3       |
| pain medication                           | rx_phys_pain_6       |
| pain medication                           | rx_phys_pain_12      |
| pain medication                           | rx_phys_pain_24      |
| pain medication                           | rx_phys_pain_36      |
| pain medication                           | rx_phys_pain_48      |
| pain medication                           | rx_phys_pain_60      |
| contraceptives                            | rx_phys_contracep_3  |
| contraceptives                            | rx_phys_contracep_6  |
| contraceptives                            | rx_phys_contracep_12 |
| contraceptives                            | rx_phys_contracep_24 |
| contraceptives                            | rx_phys_contracep_36 |
| contraceptives                            | rx_phys_contracep_48 |
| contraceptives                            | rx_phys_contracep_60 |
| other medication                          | rx_phys_otr_3        |
| other medication                          | rx_phys_otr_6        |
| other medication                          | rx_phys_otr_12       |
| other medication                          | rx_phys_otr_24       |
| other medication                          | rx_phys_otr_36       |
| other medication                          | rx_phys_otr_48       |
| other medication                          | rx_phys_otr_60       |

vi. NON-PHARMACOLOGICAL TREATMENTS FOR PHYSICAL HEALTH DISORDERS

- duration of hospitalisations for physical health reasons (continuous, sum of days)
- number of hospitalisations for physical health reasons (continuous)
- care center visits/plays for physical health reasons\*
- number of general practitioner visits for physical reasons (continuous)\*
- number of emergency room visits for physical reasons (continuous)\*
- number of outpatient specialist visits for physical health reasons (continuous)\*
- number of outpatient paediatrician visits (continuous)\*

| derived variables                                      | variable name         |
|--------------------------------------------------------|-----------------------|
| Duration of hospit for phys reasons (conti, # of days) | Duration_hosp_phys_3  |
| Duration of hospit for phys reasons (conti, # of days) | Duration_hosp_phys_6  |
| Duration of hospit for phys reasons (conti, # of days) | Duration_hosp_phys_12 |

|                                                          |                       |
|----------------------------------------------------------|-----------------------|
| Duration of hospit for phys reasons (conti, # of days)   | Duration_hosp_phys_24 |
| Duration of hospit for phys reasons (conti, # of days)   | Duration_hosp_phys_36 |
| Duration of hospit for phys reasons (conti, # of days)   | Duration_hosp_phys_48 |
| Duration of hospit for phys reasons (conti, # of days)   | Duration_hosp_phys_60 |
| # of hospit for phys reasons (continuous)                | #_hosp_phys_3         |
| # of hospit for phys reasons (continuous)                | #_hosp_phys_6         |
| # of hospit for phys reasons (continuous)                | #_hosp_phys_12        |
| # of hospit for phys reasons (continuous)                | #_hosp_phys_24        |
| # of hospit for phys reasons (continuous)                | #_hosp_phys_36        |
| # of hospit for phys reasons (continuous)                | #_hosp_phys_48        |
| # of hospit for phys reasons (continuous)                | #_hosp_phys_60        |
| Care center for physical health reasons                  | Carectr_phys_3        |
| Care center for physical health reasons                  | Carectr_phys_6        |
| Care center for physical health reasons                  | Carectr_phys_12       |
| Care center for physical health reasons                  | Carectr_phys_24       |
| Care center for physical health reasons                  | Carectr_phys_36       |
| Care center for physical health reasons                  | Carectr_phys_48       |
| Care center for physical health reasons                  | Carectr_phys_60       |
| # of outpatient specialist visit for phys reasons (cont) | #_spc_phys_3          |
| # of outpatient specialist visit for phys reasons (cont) | #_spc_phys_6          |
| # of outpatient specialist visit for phys reasons (cont) | #_spc_phys_12         |
| # of outpatient specialist visit for phys reasons (cont) | #_spc_phys_24         |
| # of outpatient specialist visit for phys reasons (cont) | #_spc_phys_36         |
| # of outpatient specialist visit for phys reasons (cont) | #_spc_phys_48         |
| # of outpatient specialist visit for phys reasons (cont) | #_spc_phys_60         |
| # of GP visits for phys reasons (continuous)             | #_gp_phys_3           |
| # of GP visits for phys reasons (continuous)             | #_gp_phys_6           |
| # of GP visits for phys reasons (continuous)             | #_gp_phys_12          |
| # of GP visits for phys reasons (continuous)             | #_gp_phys_24          |
| # of GP visits for phys reasons (continuous)             | #_gp_phys_36          |
| # of GP visits for phys reasons (continuous)             | #_gp_phys_48          |
| # of GP visits for phys reasons (continuous)             | #_gp_phys_60          |
| # of emergency visits for phys reasons (continuous)      | #_ER_phys_3           |
| # of emergency visits for phys reasons (continuous)      | #_ER_phys_6           |
| # of emergency visits for phys reasons (continuous)      | #_ER_phys_12          |
| # of emergency visits for phys reasons (continuous)      | #_ER_phys_24          |
| # of emergency visits for phys reasons (continuous)      | #_ER_phys_36          |
| # of emergency visits for phys reasons (continuous)      | #_ER_phys_48          |
| # of emergency visits for phys reasons (continuous)      | #_ER_phys_60          |

#### vii. INDIVIDUAL SOCIO-DEMOGRAPHIC VARIABLES

- Age (continuous)
- age group: 15-24
- age group: 25-34
- age group: 35-44
- age group: 45-54

- age group: 55-64
- age group: 65-74
- age group: 75-84
- age group: ≥85
- Sex
- Location – rural
- Location – non-rural
- Location – missing data
- rss 01 bas saint-laurent
- rss 02 saguenay-lac-saint-jean
- rss 03 capitale-nationale
- rss 04 mauricie et centre-du-québec
- rss 05 estrie
- rss 06 montréal
- rss 07 outaouais
- rss 08 abitibi-témiscamingue
- rss 09 côte-nord
- rss 10 nord-du-québec
- rss 11gaspésie-îles-de-la-madeleine
- rss 12 chaudière-appalaches
- rss 13 laval
- rss 14 lanaudière
- rss 15 laurentides
- rss 16 montérégie
- Adherence to the public drug plan (RAMQ) (dichotomous)

| derived variables        | variable name  |
|--------------------------|----------------|
| Age (continuous)         | Age_continuous |
| age group: 15-24         | age_15-24      |
| age group: 25-34         | age_25-34      |
| age group: 35-44         | age_35-44      |
| age group: 45-54         | age_45-54      |
| age group: 55-64         | age_55-64      |
| age group: 65-74         | age_65-74      |
| age group: 75-84         | age_75-84      |
| age group: ≥85           | age_85+        |
| sex male                 | sex_m          |
| sex female               | sex_f          |
| rss 01 bas-saint-laurent | loc_rss_01_3   |
| rss 01 bas-saint-laurent | loc_rss_01_6   |
| rss 01 bas-saint-laurent | loc_rss_01_12  |
| rss 01 bas-saint-laurent | loc_rss_01_24  |
| rss 01 bas-saint-laurent | loc_rss_01_36  |

|                                     |               |
|-------------------------------------|---------------|
| rss 01 bas-saint-laurent            | loc_rss_01_48 |
| rss 01 bas-saint-laurent            | loc_rss_01_60 |
| rss 02 saguenay-lac-saint-jean      | loc_rss_02_3  |
| rss 02 saguenay-lac-saint-jean      | loc_rss_02_6  |
| rss 02 saguenay-lac-saint-jean      | loc_rss_02_12 |
| rss 02 saguenay-lac-saint-jean      | loc_rss_02_24 |
| rss 02 saguenay-lac-saint-jean      | loc_rss_02_36 |
| rss 02 saguenay-lac-saint-jean      | loc_rss_02_48 |
| rss 02 saguenay-lac-saint-jean      | loc_rss_02_60 |
| rss 03 capitale-nationale           | loc_rss_03_3  |
| rss 03 capitale-nationale           | loc_rss_03_6  |
| rss 03 capitale-nationale           | loc_rss_03_12 |
| rss 03 capitale-nationale           | loc_rss_03_24 |
| rss 03 capitale-nationale           | loc_rss_03_36 |
| rss 03 capitale-nationale           | loc_rss_03_48 |
| rss 03 capitale-nationale           | loc_rss_03_60 |
| rss 04 mauricie et centre-du-québec | loc_rss_04_3  |
| rss 04 mauricie et centre-du-québec | loc_rss_04_6  |
| rss 04 mauricie et centre-du-québec | loc_rss_04_12 |
| rss 04 mauricie et centre-du-québec | loc_rss_04_24 |
| rss 04 mauricie et centre-du-québec | loc_rss_04_36 |
| rss 04 mauricie et centre-du-québec | loc_rss_04_48 |
| rss 04 mauricie et centre-du-québec | loc_rss_04_60 |
| rss 05 estrie                       | loc_rss_05_3  |
| rss 05 estrie                       | loc_rss_05_6  |
| rss 05 estrie                       | loc_rss_05_12 |
| rss 05 estrie                       | loc_rss_05_24 |
| rss 05 estrie                       | loc_rss_05_36 |
| rss 05 estrie                       | loc_rss_05_48 |
| rss 05 estrie                       | loc_rss_05_60 |
| rss 06 montréal                     | loc_rss_06_3  |
| rss 06 montréal                     | loc_rss_06_6  |
| rss 06 montréal                     | loc_rss_06_12 |
| rss 06 montréal                     | loc_rss_06_24 |
| rss 06 montréal                     | loc_rss_06_36 |
| rss 06 montréal                     | loc_rss_06_48 |
| rss 06 montréal                     | loc_rss_06_60 |
| rss 07 outaouais                    | loc_rss_07_3  |
| rss 07 outaouais                    | loc_rss_07_6  |
| rss 07 outaouais                    | loc_rss_07_12 |
| rss 07 outaouais                    | loc_rss_07_24 |

|                                      |               |
|--------------------------------------|---------------|
| rss 07 outaouais                     | loc_rss_07_36 |
| rss 07 outaouais                     | loc_rss_07_48 |
| rss 07 outaouais                     | loc_rss_07_60 |
| 08 abitibi-témiscamingue             | loc_rss_08_3  |
| rss 08 abitibi-témiscamingue         | loc_rss_08_6  |
| rss 08 abitibi-témiscamingue         | loc_rss_08_12 |
| rss 08 abitibi-témiscamingue         | loc_rss_08_24 |
| 08 abitibi-témiscamingue             | loc_rss_08_36 |
| rss 08 abitibi-témiscamingue         | loc_rss_08_48 |
| rss 08 abitibi-témiscamingue         | loc_rss_08_60 |
| rss 09 côte-nord                     | loc_rss_09_3  |
| rss 09 côte-nord                     | loc_rss_09_6  |
| rss 09 côte-nord                     | loc_rss_09_12 |
| rss 09 côte-nord                     | loc_rss_09_24 |
| rss 09 côte-nord                     | loc_rss_09_36 |
| rss 09 côte-nord                     | loc_rss_09_48 |
| rss 09 côte-nord                     | loc_rss_09_60 |
| rss 10 nord-du-québec                | loc_rss_10_3  |
| rss 10 nord-du-québec                | loc_rss_10_6  |
| rss 10 nord-du-québec                | loc_rss_10_12 |
| rss 10 nord-du-québec                | loc_rss_10_24 |
| rss 10 nord-du-québec                | loc_rss_10_36 |
| rss 10 nord-du-québec                | loc_rss_10_48 |
| rss 10 nord-du-québec                | loc_rss_10_60 |
| rss 11 gaspésie-îles-de-la-madeleine | loc_rss_11_3  |
| rss 11 gaspésie-îles-de-la-madeleine | loc_rss_11_6  |
| rss 11 gaspésie-îles-de-la-madeleine | loc_rss_11_12 |
| rss 11 gaspésie-îles-de-la-madeleine | loc_rss_11_24 |
| rss 11 gaspésie-îles-de-la-madeleine | loc_rss_11_36 |
| rss 11 gaspésie-îles-de-la-madeleine | loc_rss_11_48 |
| rss 11 gaspésie-îles-de-la-madeleine | loc_rss_11_60 |
| rss 12 chaudière-appalaches          | loc_rss_12_3  |
| rss 12 chaudière-appalaches          | loc_rss_12_6  |
| rss 12 chaudière-appalaches          | loc_rss_12_12 |
| rss 12 chaudière-appalaches          | loc_rss_12_24 |
| rss 12 chaudière-appalaches          | loc_rss_12_36 |
| rss 12 chaudière-appalaches          | loc_rss_12_48 |
| rss 12 chaudière-appalaches          | loc_rss_12_60 |
| rss 13 laval                         | loc_rss_13_3  |
| rss 13 laval                         | loc_rss_13_6  |
| rss 13 laval                         | loc_rss_13_12 |



|                       |               |
|-----------------------|---------------|
| rss 13 laval          | loc_rss_13_24 |
| rss 13 laval          | loc_rss_13_36 |
| rss 13 laval          | loc_rss_13_48 |
| rss 13 laval          | loc_rss_13_60 |
| rss 14 lanaudière     | loc_rss_14_3  |
| rss 14 lanaudière     | loc_rss_14_6  |
| rss 14 lanaudière     | loc_rss_14_12 |
| rss 14 lanaudière     | loc_rss_14_24 |
| rss 14 lanaudière     | loc_rss_14_36 |
| rss 14 lanaudière     | loc_rss_14_48 |
| rss 14 lanaudière     | loc_rss_14_60 |
| rss 15 laurentides    | loc_rss_15_3  |
| rss 15 laurentides    | loc_rss_15_6  |
| rss 15 laurentides    | loc_rss_15_12 |
| rss 15 laurentides    | loc_rss_15_24 |
| rss 15 laurentides    | loc_rss_15_36 |
| rss 15 laurentides    | loc_rss_15_48 |
| rss 15 laurentides    | loc_rss_15_60 |
| rss 16 montérégie     | loc_rss_16_3  |
| rss 16 montérégie     | loc_rss_16_6  |
| rss 16 montérégie     | loc_rss_16_12 |
| rss 16 montérégie     | loc_rss_16_24 |
| rss 16 montérégie     | loc_rss_16_36 |
| rss 16 montérégie     | loc_rss_16_48 |
| rss 16 montérégie     | loc_rss_16_60 |
| location nonrural     | nonrural_3    |
| location nonrural     | nonrural_6    |
| location nonrural     | nonrural_12   |
| location nonrural     | nonrural_24   |
| location nonrural     | nonrural_36   |
| location nonrural     | nonrural_48   |
| location nonrural     | nonrural_60   |
| location rural        | rural_3       |
| location rural        | rural_6       |
| location rural        | rural_12      |
| location rural        | rural_24      |
| location rural        | rural_36      |
| location rural        | rural_48      |
| location rural        | rural_60      |
| location missing data | loc_missing_3 |
| location missing data | loc_missing_6 |

|                                          |                 |
|------------------------------------------|-----------------|
| location missing data                    | loc_missing_12  |
| location missing data                    | loc_missing_24  |
| location missing data                    | loc_missing_36  |
| location missing data                    | loc_missing_48  |
| location missing data                    | loc_missing_60  |
| adherence to the public drug plan (RAMQ) | PublicRxPlan_3  |
| adherence to the public drug plan (RAMQ) | PublicRxPlan_6  |
| adherence to the public drug plan (RAMQ) | PublicRxPlan_12 |
| adherence to the public drug plan (RAMQ) | PublicRxPlan_24 |
| adherence to the public drug plan (RAMQ) | PublicRxPlan_36 |
| adherence to the public drug plan (RAMQ) | PublicRxPlan_48 |
| adherence to the public drug plan (RAMQ) | PublicRxPlan_60 |

## ENVIRONMENTAL VARIABLES

### i. DEPRIVATION INDEX

- Material deprivation (from 1, least deprived to 5, most deprived)
- Social deprivation (from 1, least deprived to 5, most deprived)

| <b>derived variables<sup>7</sup></b> | <b>variable name</b> |
|--------------------------------------|----------------------|
| material deprivation (1-5)           | matdep_3             |
| material deprivation (1-5)           | matdep_6             |
| material deprivation (1-5)           | matdep_12            |
| material deprivation (1-5)           | matdep_24            |
| material deprivation (1-5)           | matdep_36            |
| material deprivation (1-5)           | matdep_48            |
| material deprivation (1-5)           | matdep_60            |
| social deprivation (1-5)             | socdep_3             |
| social deprivation (1-5)             | socdep_6             |
| social deprivation (1-5)             | socdep_12            |
| social deprivation (1-5)             | socdep_24            |
| social deprivation (1-5)             | socdep_36            |
| social deprivation (1-5)             | socdep_48            |
| social deprivation (1-5)             | socdep_60            |

## SYSTEM VARIABLES

### i. HEALTH SYSTEM ENVIRONMENT (HEALTH SYSTEM)

- Mental health budget

- Bas-Saint-Laurent
- Saguenay-Lac-Saint-Jean
- Capitale-Nationale
- Mauricie et Centre-du-Québec
- Estrie
- Montréal
- Outaouais
- Abitibi-Témiscamingue
- Côte-Nord
- Nord-du-Québec
- Gaspésie-Îles-de-la-Madeleine
- Chaudière-Appalaches
- Laval
- Lanaudière
- Laurentides
- Montérégie
- Addictions budget
  - Bas-Saint-Laurent
  - Saguenay-Lac-Saint-Jean
  - Capitale-Nationale
  - Mauricie et Centre-du-Québec
  - Estrie
  - Montréal
  - Outaouais
  - Abitibi-Témiscamingue
  - Côte-Nord
  - Nord-du-Québec
  - Gaspésie-Îles-de-la-Madeleine
  - Chaudière-Appalaches
  - Laval
  - Lanaudière
  - Laurentides
  - Montérégie
- regional mental health budget (\$/capita)
  - 2018-2019
  - 2017-2018
  - 2016-2017
  - 2015-2016
- regional addictions health budget (\$/capita)
  - 2018-2019
  - 2017-2018
  - 2016-2017
  - 2015-2016

| derived variables                             | variable name |
|-----------------------------------------------|---------------|
| rss 01 bas-saint-laurent mental health budget | rss_01_mh_3   |
| rss 01 bas-saint-laurent mental health budget | rss_01_mh_6   |
| rss 01 bas-saint-laurent mental health budget | rss_01_mh_12  |

|                                                          |              |
|----------------------------------------------------------|--------------|
| rss 01 bas-saint-laurent mental health budget            | rss_01_mh_24 |
| rss 01 bas-saint-laurent mental health budget            | rss_01_mh_36 |
| rss 01 bas-saint-laurent mental health budget            | rss_01_mh_48 |
| rss 01 bas-saint-laurent mental health budget            | rss_01_mh_60 |
| rss 02 saguenay-lac-saint-jean mental health budget      | rss_02_mh_3  |
| rss 02 saguenay-lac-saint-jean mental health budget      | rss_02_mh_6  |
| rss 02 saguenay-lac-saint-jean mental health budget      | rss_02_mh_12 |
| rss 02 saguenay-lac-saint-jean mental health budget      | rss_02_mh_24 |
| rss 02 saguenay-lac-saint-jean mental health budget      | rss_02_mh_36 |
| rss 02 saguenay-lac-saint-jean mental health budget      | rss_02_mh_48 |
| rss 02 saguenay-lac-saint-jean mental health budget      | rss_02_mh_60 |
| rss 03 capitale-nationale mental health budget           | rss_03_mh_3  |
| rss 03 capitale-nationale mental health budget           | rss_03_mh_6  |
| rss 03 capitale-nationale mental health budget           | rss_03_mh_12 |
| rss 03 capitale-nationale mental health budget           | rss_03_mh_14 |
| rss 03 capitale-nationale mental health budget           | rss_03_mh_36 |
| rss 03 capitale-nationale mental health budget           | rss_03_mh_48 |
| rss 03 capitale-nationale mental health budget           | rss_03_mh_60 |
| rss 04 mauricie et centre-du-québec mental health budget | rss_04_mh_3  |
| rss 04 mauricie et centre-du-québec mental health budget | rss_04_mh_6  |
| rss 04 mauricie et centre-du-québec mental health budget | rss_04_mh_12 |
| rss 04 mauricie et centre-du-québec mental health budget | rss_04_mh_24 |
| rss 04 mauricie et centre-du-québec mental health budget | rss_04_mh_36 |
| rss 04 mauricie et centre-du-québec mental health budget | rss_04_mh_48 |
| rss 04 mauricie et centre-du-québec mental health budget | rss_04_mh_60 |
| rss 05 estrie mental health budget                       | rss_05_mh_3  |
| rss 05 estrie mental health budget                       | rss_05_mh_6  |
| rss 05 estrie mental health budget                       | rss_05_mh_12 |
| rss 05 estrie mental health budget                       | rss_05_mh_24 |
| rss 05 estrie mental health budget                       | rss_05_mh_36 |
| rss 05 estrie mental health budget                       | rss_05_mh_48 |
| rss 05 estrie mental health budget                       | rss_05_mh_60 |
| rss 06 montréal mental health budget                     | rss_06_mh_3  |
| rss 06 montréal mental health budget                     | rss_06_mh_6  |
| rss 06 montréal mental health budget                     | rss_06_mh_12 |
| rss 06 montréal mental health budget                     | rss_06_mh_24 |
| rss 06 montréal mental health budget                     | rss_06_mh_36 |
| rss 06 montréal mental health budget                     | rss_06_mh_48 |
| rss 06 montréal mental health budget                     | rss_06_mh_60 |
| rss 07 outaouais mental health budget                    | rss_07_mh_3  |
| rss 07 outaouais mental health budget                    | rss_07_mh_6  |

|                                                           |              |
|-----------------------------------------------------------|--------------|
| rss 07 outaouais mental health budget                     | rss_07_mh_12 |
| rss 07 outaouais mental health budget                     | rss_07_mh_24 |
| rss 07 outaouais mental health budget                     | rss_07_mh_36 |
| rss 07 outaouais mental health budget                     | rss_07_mh_48 |
| rss 07 outaouais mental health budget                     | rss_07_mh_60 |
| rss 08 abitibi-témiscamingue mental health budget         | rss_08_mh_3  |
| rss 08 abitibi-témiscamingue mental health budget         | rss_08_mh_6  |
| rss 08 abitibi-témiscamingue mental health budget         | rss_08_mh_12 |
| rss 08 abitibi-témiscamingue mental health budget         | rss_08_mh_24 |
| rss 08 abitibi-témiscamingue mental health budget         | rss_08_mh_36 |
| rss 08 abitibi-témiscamingue mental health budget         | rss_08_mh_48 |
| rss 08 abitibi-témiscamingue mental health budget         | rss_08_mh_60 |
| rss 09 côte-nord mental health budget                     | rss_09_mh_3  |
| rss 09 côte-nord mental health budget                     | rss_09_mh_6  |
| rss 09 côte-nord mental health budget                     | rss_09_mh_12 |
| rss 09 côte-nord mental health budget                     | rss_09_mh_24 |
| rss 09 côte-nord mental health budget                     | rss_09_mh_36 |
| rss 09 côte-nord mental health budget                     | rss_09_mh_48 |
| rss 09 côte-nord mental health budget                     | rss_09_mh_60 |
| rss 10 nord-du-québec mental health budget                | rss_10_mh_3  |
| rss 10 nord-du-québec mental health budget                | rss_10_mh_6  |
| rss 10 nord-du-québec mental health budget                | rss_10_mh_12 |
| rss 10 nord-du-québec mental health budget                | rss_10_mh_24 |
| rss 10 nord-du-québec mental health budget                | rss_10_mh_36 |
| rss 10 nord-du-québec mental health budget                | rss_10_mh_48 |
| rss 10 nord-du-québec mental health budget                | rss_10_mh_60 |
| rss 11 gaspésie-îles-de-la-madeleine mental health budget | rss_11_mh_3  |
| rss 11 gaspésie-îles-de-la-madeleine mental health budget | rss_11_mh_6  |
| rss 11 gaspésie-îles-de-la-madeleine mental health budget | rss_11_mh_12 |
| rss 11 gaspésie-îles-de-la-madeleine mental health budget | rss_11_mh_24 |
| rss 11 gaspésie-îles-de-la-madeleine mental health budget | rss_11_mh_36 |
| rss 11 gaspésie-îles-de-la-madeleine mental health budget | rss_11_mh_48 |
| rss 11 gaspésie-îles-de-la-madeleine mental health budget | rss_11_mh_60 |
| rss 12 chaudière-appalaches mental health budget          | rss_12_mh_3  |
| rss 12 chaudière-appalaches mental health budget          | rss_12_mh_6  |
| rss 12 chaudière-appalaches mental health budget          | rss_12_mh_12 |
| rss 12 chaudière-appalaches mental health budget          | rss_12_mh_24 |
| rss 12 chaudière-appalaches mental health budget          | rss_12_mh_36 |
| rss 12 chaudière-appalaches mental health budget          | rss_12_mh_48 |
| rss 12 chaudière-appalaches mental health budget          | rss_12_mh_60 |
| rss 13 laval mental health budget                         | rss_13_mh_3  |

|                                                  |              |
|--------------------------------------------------|--------------|
| rss 13 laval mental health budget                | rss_13_mh_6  |
| rss 13 laval mental health budget                | rss_13_mh_12 |
| rss 13 laval mental health budget                | rss_13_mh_24 |
| rss 13 laval mental health budget                | rss_13_mh_36 |
| rss 13 laval mental health budget                | rss_13_mh_48 |
| rss 13 laval mental health budget                | rss_13_mh_60 |
| rss 14 lanaudière mental health budget           | rss_14_mh_3  |
| rss 14 lanaudière mental health budget           | rss_14_mh_6  |
| rss 14 lanaudière mental health budget           | rss_14_mh_12 |
| rss 14 lanaudière mental health budget           | rss_14_mh_24 |
| rss 14 lanaudière mental health budget           | rss_14_mh_36 |
| rss 14 lanaudière mental health budget           | rss_14_mh_48 |
| rss 14 lanaudière mental health budget           | rss_14_mh_60 |
| rss 15 laurentides mental health budget          | rss_15_mh_3  |
| rss 15 laurentides mental health budget          | rss_15_mh_6  |
| rss 15 laurentides mental health budget          | rss_15_mh_12 |
| rss 15 laurentides mental health budget          | rss_15_mh_24 |
| rss 15 laurentides mental health budget          | rss_15_mh_36 |
| rss 15 laurentides mental health budget          | rss_15_mh_48 |
| rss 15 laurentides mental health budget          | rss_15_mh_60 |
| rss 16 montérégie mental health budget           | rss_16_mh_3  |
| rss 16 montérégie mental health budget           | rss_16_mh_6  |
| rss 16 montérégie mental health budget           | rss_16_mh_12 |
| rss 16 montérégie mental health budget           | rss_16_mh_24 |
| rss 16 montérégie mental health budget           | rss_16_mh_36 |
| rss 16 montérégie mental health budget           | rss_16_mh_48 |
| rss 16 montérégie mental health budget           | rss_16_mh_60 |
| rss 01 bas-saint-laurent addictions budget       | rss_01_a_3   |
| rss 01 bas-saint-laurent addictions budget       | rss_01_a_6   |
| rss 01 bas-saint-laurent addictions budget       | rss_01_a_12  |
| rss 01 bas-saint-laurent addictions budget       | rss_01_a_24  |
| rss 01 bas-saint-laurent addictions budget       | rss_01_a_36  |
| rss 01 bas-saint-laurent addictions budget       | rss_01_a_48  |
| rss 01 bas-saint-laurent addictions budget       | rss_01_a_60  |
| rss 02 saguenay-lac-saint-jean addictions budget | rss_02_a_3   |
| rss 02 saguenay-lac-saint-jean addictions budget | rss_02_a_6   |
| rss 02 saguenay-lac-saint-jean addictions budget | rss_02_a_12  |
| rss 02 saguenay-lac-saint-jean addictions budget | rss_02_a_24  |
| rss 02 saguenay-lac-saint-jean addictions budget | rss_02_a_36  |
| rss 02 saguenay-lac-saint-jean addictions budget | rss_02_a_48  |
| rss 02 saguenay-lac-saint-jean addictions budget | rss_02_a_60  |

|                                                       |             |
|-------------------------------------------------------|-------------|
| rss 03 capitale-nationale addictions budget           | rss_03_a_3  |
| rss 03 capitale-nationale addictions budget           | rss_03_a_6  |
| rss 03 capitale-nationale addictions budget           | rss_03_a_12 |
| rss 03 capitale-nationale addictions budget           | rss_03_a_24 |
| rss 03 capitale-nationale addictions budget           | rss_03_a_36 |
| rss 03 capitale-nationale addictions budget           | rss_03_a_48 |
| rss 03 capitale-nationale addictions budget           | rss_03_a_60 |
| rss 04 mauricie et centre-du-québec addictions budget | rss_04_a_3  |
| rss 04 mauricie et centre-du-québec addictions budget | rss_04_a_6  |
| rss 04 mauricie et centre-du-québec addictions budget | rss_04_a_12 |
| rss 04 mauricie et centre-du-québec addictions budget | rss_04_a_24 |
| rss 04 mauricie et centre-du-québec addictions budget | rss_04_a_36 |
| rss 04 mauricie et centre-du-québec addictions budget | rss_04_a_48 |
| rss 04 mauricie et centre-du-québec addictions budget | rss_04_a_60 |
| rss 05 estrie addictions budget                       | rss_05_a_3  |
| rss 05 estrie addictions budget                       | rss_05_a_6  |
| rss 05 estrie addictions budget                       | rss_05_a_12 |
| rss 05 estrie addictions budget                       | rss_05_a_24 |
| rss 05 estrie addictions budget                       | rss_05_a_36 |
| rss 05 estrie addictions budget                       | rss_05_a_48 |
| rss 05 estrie addictions budget                       | rss_05_a_60 |
| rss 06 montréal addictions budget                     | rss_06_a_3  |
| rss 06 montréal addictions budget                     | rss_06_a_6  |
| rss 06 montréal addictions budget                     | rss_06_a_12 |
| rss 06 montréal addictions budget                     | rss_06_a_24 |
| rss 06 montréal addictions budget                     | rss_06_a_36 |
| rss 06 montréal addictions budget                     | rss_06_a_48 |
| rss 06 montréal addictions budget                     | rss_06_a_60 |
| rss 07 outaouais addictions budget                    | rss_07_a_3  |
| rss 07 outaouais addictions budget                    | rss_07_a_6  |
| rss 07 outaouais addictions budget                    | rss_07_a_12 |
| rss 07 outaouais addictions budget                    | rss_07_a_24 |
| rss 07 outaouais addictions budget                    | rss_07_a_36 |
| rss 07 outaouais addictions budget                    | rss_07_a_48 |
| rss 07 outaouais addictions budget                    | rss_07_a_60 |
| rss 08 abitibi-témiscamingue addictions budget        | rss_08_a_3  |
| rss 08 abitibi-témiscamingue addictions budget        | rss_08_a_6  |
| rss 08 abitibi-témiscamingue addictions budget        | rss_08_a_12 |
| rss 08 abitibi-témiscamingue addictions budget        | rss_08_a_24 |
| rss 08 abitibi-témiscamingue addictions budget        | rss_08_a_36 |
| rss 08 abitibi-témiscamingue addictions budget        | rss_08_a_48 |

|                                                         |             |
|---------------------------------------------------------|-------------|
| rss 08 abitibi-témiscamingue addictions budget          | rss_08_a_60 |
| rss 09 côte-nord addictions budget                      | rss_09_a_3  |
| rss 09 côte-nord addictions budget                      | rss_09_a_6  |
| rss 09 côte-nord addictions budget                      | rss_09_a_12 |
| rss 09 côte-nord addictions budget                      | rss_09_a_24 |
| rss 09 côte-nord addictions budget                      | rss_09_a_36 |
| rss 09 côte-nord addictions budget                      | rss_09_a_48 |
| rss 09 côte-nord addictions budget                      | rss_09_a_60 |
| rss 10 nord-du-québec addictions budget                 | rss_10_a_3  |
| rss 10 nord-du-québec addictions budget                 | rss_10_a_6  |
| rss 10 nord-du-québec addictions budget                 | rss_10_a_12 |
| rss 10 nord-du-québec addictions budget                 | rss_10_a_24 |
| rss 10 nord-du-québec addictions budget                 | rss_10_a_36 |
| rss 10 nord-du-québec addictions budget                 | rss_10_a_48 |
| rss 10 nord-du-québec addictions budget                 | rss_10_a_60 |
| rss 11 gaspésie--îles-de-la-madeleine addictions budget | rss_11_a_3  |
| rss 11 gaspésie--îles-de-la-madeleine addictions budget | rss_11_a_6  |
| rss 11 gaspésie--îles-de-la-madeleine addictions budget | rss_11_a_12 |
| rss 11 gaspésie--îles-de-la-madeleine addictions budget | rss_11_a_24 |
| rss 11 gaspésie--îles-de-la-madeleine addictions budget | rss_11_a_36 |
| rss 11 gaspésie--îles-de-la-madeleine addictions budget | rss_11_a_48 |
| rss 11 gaspésie--îles-de-la-madeleine addictions budget | rss_11_a_60 |
| rss 12 chaudière-appalaches addictions budget           | rss_12_a_3  |
| rss 12 chaudière-appalaches addictions budget           | rss_12_a_6  |
| rss 12 chaudière-appalaches addictions budget           | rss_12_a_12 |
| rss 12 chaudière-appalaches addictions budget           | rss_12_a_24 |
| rss 12 chaudière-appalaches addictions budget           | rss_12_a_36 |
| rss 12 chaudière-appalaches addictions budget           | rss_12_a_48 |
| rss 12 chaudière-appalaches addictions budget           | rss_12_a_60 |
| rss 13 laval addictions budget                          | rss_13_a_3  |
| rss 13 laval addictions budget                          | rss_13_a_6  |
| rss 13 laval addictions budget                          | rss_13_a_12 |
| rss 13 laval addictions budget                          | rss_13_a_24 |
| rss 13 laval addictions budget                          | rss_13_a_36 |
| rss 13 laval addictions budget                          | rss_13_a_48 |
| rss 13 laval addictions budget                          | rss_13_a_60 |
| rss 14 lanaudière addictions budget                     | rss_14_a_3  |
| rss 14 lanaudière addictions budget                     | rss_14_a_6  |
| rss 14 lanaudière addictions budget                     | rss_14_a_12 |
| rss 14 lanaudière addictions budget                     | rss_14_a_24 |
| rss 14 lanaudière addictions budget                     | rss_14_a_36 |



|                                           |                           |
|-------------------------------------------|---------------------------|
| rss 14 lanaudière addictions budget       | rss_14_a_48               |
| rss 14 lanaudière addictions budget       | rss_14_a_60               |
| rss 15 laurentides addictions budget      | rss_15_a_3                |
| rss 15 laurentides addictions budget      | rss_15_a_6                |
| rss 15 laurentides addictions budget      | rss_15_a_12               |
| rss 15 laurentides addictions budget      | rss_15_a_24               |
| rss 15 laurentides addictions budget      | rss_15_a_36               |
| rss 15 laurentides addictions budget      | rss_15_a_48               |
| rss 15 laurentides addictions budget      | rss_15_a_60               |
| rss 16 montérégie addictions budget       | rss_16_a_3                |
| rss 16 montérégie addictions budget       | rss_16_a_6                |
| rss 16 montérégie addictions budget       | rss_16_a_12               |
| rss 16 montérégie addictions budget       | rss_16_a_24               |
| rss 16 montérégie addictions budget       | rss_16_a_36               |
| rss 16 montérégie addictions budget       | rss_16_a_48               |
| rss 16 montérégie addictions budget       | rss_16_a_60               |
| regional mental health budget (\$/capita) | region_mhbudget_2018-2019 |
| regional mental health budget (\$/capita) | region_mhbudget_2017-2018 |
| regional mental health budget (\$/capita) | region_mhbudget_2016-2017 |
| regional mental health budget (\$/capita) | region_mhbudget_2015-2016 |
| regional addictions budget (\$/capita)    | region_abudget_2018-2019  |
| regional addictions budget (\$/capita)    | region_abudget_2017-2018  |
| regional addictions budget (\$/capita)    | region_abudget_2016-2017  |
| regional addictions budget (\$/capita)    | region_abudget_2015-2016  |

## ii. QUALITY OF CARE INDICATORS (QUALITYCARE)

- quality of anxiety or depressive disorders mental health services follow-up in primary care (continuous)
- quality of mental health services depression disorder mental health services follow-up in primary care (continuous)
- quality of substance use disorder mental health services follow-up in primary care (continuous)
- quality of mental health care services follow-up after hospitalization: readmission within 30 days (continuous)
- quality of mental health services follow-up in primary care after suicide attempt (continuous)
- quality of community mental health services (continuous)
- quality of community mental health services of patients with severe mental illness (continuous)
- quality of community mental health services of patients with common mental disorders (continuous)
- quality of community mental health services of patients with personality disorders (continuous)
- adequate use of emergency room for mental health service (continuous)

| <b>derived variables</b>                                                                                 | <b>variable name</b>   |
|----------------------------------------------------------------------------------------------------------|------------------------|
| quality of anxiety or depressive disorders mental health services follow-up in primary care (continuous) | qfu_primcare_anxdep_3  |
| quality of anxiety or depressive disorders mental health services follow-up in primary care (continuous) | qfu_primcare_anxdep_6  |
| quality of anxiety or depressive disorders mental health services follow-up in primary care (continuous) | qfu_primcare_anxdep_12 |
| quality of anxiety or depressive disorders mental health services follow-up in primary care (continuous) | qfu_primcare_anxdep_24 |
| quality of anxiety or depressive disorders mental health services follow-up in primary care (continuous) | qfu_primcare_anxdep_36 |
| quality of anxiety or depressive disorders mental health services follow-up in primary care (continuous) | qfu_primcare_anxdep_48 |
| quality of anxiety or depressive disorders mental health services follow-up in primary care (continuous) | qfu_primcare_anxdep_60 |
| quality of depression disorder mental health services follow-up in primary care (continuous)             | qfu_primcare_dep_3     |
| quality of depression disorder mental health services follow-up in primary care (continuous)             | qfu_primcare_dep_6     |
| quality of depression disorder mental health services follow-up in primary care (continuous)             | qfu_primcare_dep_12    |
| quality of depression disorder mental health services follow-up in primary care (continuous)             | qfu_primcare_dep_24    |
| quality of depression disorder mental health services follow-up in primary care (continuous)             | qfu_primcare_dep_36    |
| quality of depression disorder mental health services follow-up in primary care (continuous)             | qfu_primcare_dep_48    |
| quality of depression disorder mental health services follow-up in primary care (continuous)             | qfu_primcare_dep_60    |
| quality of substance use disorder mental health services follow-up in primary care (continuous)          | qfu_primcare_sud_3     |
| quality of substance use disorder mental health services follow-up in primary care (continuous)          | qfu_primcare_sud_6     |
| quality of substance use disorder mental health services follow-up in primary care (continuous)          | qfu_primcare_sud_12    |

|                                                                                                                 |                                   |
|-----------------------------------------------------------------------------------------------------------------|-----------------------------------|
| quality of substance use disorder mental health services follow-up in primary care (continuous)                 | qfu_primcare_sud_24               |
| quality of substance use disorder mental health services follow-up in primary care (continuous)                 | qfu_primcare_sud_36               |
| quality of substance use disorder mental health services follow-up in primary care (continuous)                 | qfu_primcare_sud_48               |
| quality of substance use disorder mental health services follow-up in primary care (continuous)                 | qfu_primcare_sud_60               |
| quality of mental health care services follow-up after hospitalization: readmission within 30 days (continuous) | qfu_posthosp_readmit30_3          |
| quality of mental health care services follow-up after hospitalization: readmission within 30 days (continuous) | qfu_posthosp_readmit30_6          |
| quality of mental health care services follow-up after hospitalization: readmission within 30 days (continuous) | qfu_posthosp_readmit30_12         |
| quality of mental health care services follow-up after hospitalization: readmission within 30 days (continuous) | qfu_posthosp_readmit30_24         |
| quality of mental health care services follow-up after hospitalization: readmission within 30 days (continuous) | qfu_posthosp_readmit30_36         |
| quality of mental health care services follow-up after hospitalization: readmission within 30 days (continuous) | qfu_posthosp_readmit30_48         |
| quality of mental health care services follow-up after hospitalization: readmission within 30 days (continuous) | qfu_posthosp_readmit30_60         |
| quality of mental health services followup in primary care after suicide attempt (continuous)                   | qfu_primcare_postsucideattempt_3  |
| quality of mental health services followup in primary care after suicide attempt (continuous)                   | qfu_primcare_postsucideattempt_6  |
| quality of mental health services followup in primary care after suicide attempt (continuous)                   | qfu_primcare_postsucideattempt_12 |
| quality of mental health services followup in primary care after suicide attempt (continuous)                   | qfu_primcare_postsucideattempt_24 |
| quality of mental health services followup in primary care after suicide attempt (continuous)                   | qfu_primcare_postsucideattempt_36 |
| quality of mental health services followup in primary care after suicide attempt (continuous)                   | qfu_primcare_postsucideattempt_48 |
| quality of mental health services followup in primary care after suicide attempt (continuous)                   | qfu_primcare_postsucideattempt_60 |
| quality of community mental health services (continuous)                                                        | qcomserv_3                        |

|                                                                                                   |                    |
|---------------------------------------------------------------------------------------------------|--------------------|
| quality of community mental health services (continuous)                                          | qcomserv_6         |
| quality of community mental health services (continuous)                                          | qcomserv_12        |
| quality of community mental health services (continuous)                                          | qcomserv_24        |
| quality of community mental health services (continuous)                                          | qcomserv_36        |
| quality of community mental health services (continuous)                                          | qcomserv_48        |
| quality of community mental health services (continuous)                                          | qcomserv_60        |
| quality of community mental health services of patients with severe mental illness (continuous)   | qcomserv_severe_3  |
| quality of community mental health services of patients with severe mental illness (continuous)   | qcomserv_severe_6  |
| quality of community mental health services of patients with severe mental illness (continuous)   | qcomserv_severe_12 |
| quality of community mental health services of patients with severe mental illness (continuous)   | qcomserv_severe_24 |
| quality of community mental health services of patients with severe mental illness (continuous)   | qcomserv_severe_36 |
| quality of community mental health services of patients with severe mental illness (continuous)   | qcomserv_severe_48 |
| quality of community mental health services of patients with severe mental illness (continuous)   | qcomserv_severe_60 |
| quality of community mental health services of patients with common mental disorders (continuous) | qcomserv_cmd_3     |
| quality of community mental health services of patients with common mental disorders (continuous) | qcomserv_cmd_6     |
| quality of community mental health services of patients with common mental disorders (continuous) | qcomserv_cmd_12    |
| quality of community mental health services of patients with common mental disorders (continuous) | qcomserv_cmd_24    |
| quality of community mental health services of patients with common mental disorders (continuous) | qcomserv_cmd_36    |
| quality of community mental health services of patients with common mental disorders (continuous) | qcomserv_cmd_48    |

|                                                                                                   |                 |
|---------------------------------------------------------------------------------------------------|-----------------|
| quality of community mental health services of patients with common mental disorders (continuous) | qcomserv_cmd_60 |
| quality of community mental health services of patients with personality disorders (continuous)   | qcomserv_pd_3   |
| quality of community mental health services of patients with personality disorders (continuous)   | qcomserv_pd_6   |
| quality of community mental health services of patients with personality disorders (continuous)   | qcomserv_pd_12  |
| quality of community mental health services of patients with personality disorders (continuous)   | qcomserv_pd_24  |
| quality of community mental health services of patients with personality disorders (continuous)   | qcomserv_pd_36  |
| quality of community mental health services of patients with personality disorders (continuous)   | qcomserv_pd_48  |
| quality of community mental health services of patients with personality disorders (continuous)   | qcomserv_pd_60  |
| adequate use of emergency room for mental health service (continuous)                             | aduse_er_3      |
| adequate use of emergency room for mental health service (continuous)                             | aduse_er_6      |
| adequate use of emergency room for mental health service (continuous)                             | aduse_er_12     |
| adequate use of emergency room for mental health service (continuous)                             | aduse_er_24     |
| adequate use of emergency room for mental health service (continuous)                             | aduse_er_36     |
| adequate use of emergency room for mental health service (continuous)                             | aduse_er_48     |
| adequate use of emergency room for mental health service (continuous)                             | aduse_er_60     |

## APPENDIX A: CLASSES\_MEDICAMENTS\_CAROLINE SIROIS 30 AVRIL.XLSX

Mental health mediation

| Psychotropic medications |           |             |                           |  |  |  |
|--------------------------|-----------|-------------|---------------------------|--|--|--|
| Group                    | Sub-group | Medications | Common denomination codes |  |  |  |
|                          |           |             |                           |  |  |  |

| Antipsychotics |          |                   |       |                                     |  |
|----------------|----------|-------------------|-------|-------------------------------------|--|
|                | Typical  |                   |       |                                     |  |
|                |          | Chlorpromazine    | 1924  |                                     |  |
|                |          | Flupenthixol      | 41863 |                                     |  |
|                |          |                   | 43202 |                                     |  |
|                |          | Fluphenazine      | 4056  |                                     |  |
|                |          |                   | 4069  |                                     |  |
|                |          |                   | 34284 |                                     |  |
|                |          | Haloperidol       | 4394  |                                     |  |
|                |          |                   | 43540 |                                     |  |
|                |          |                   | 43826 |                                     |  |
|                |          |                   | 46292 |                                     |  |
|                |          | Loxapine          | 34219 |                                     |  |
|                |          |                   | 37612 |                                     |  |
|                |          |                   | 40745 |                                     |  |
|                |          | Methotrimeprazine | 6045  |                                     |  |
|                |          | Perphenazine      | 7176  |                                     |  |
|                |          |                   | 46011 | (In combination with amitryptiline) |  |
|                |          | Pimozide          | 33465 |                                     |  |
|                |          | Pipotiazine       | 41707 |                                     |  |
|                |          | Prochlorperazine  | 45458 |                                     |  |
|                |          |                   | 45528 |                                     |  |
|                |          |                   | 8125  |                                     |  |
|                |          | Thioridazine      | 9594  |                                     |  |
|                |          | Thiopropazine     | 9568  |                                     |  |
|                |          | Trifluoperazine   | 9802  |                                     |  |
|                |          |                   | 34440 |                                     |  |
|                |          |                   | 46108 | (In combination with isopropamide)  |  |
|                |          | Zuclopenthixol    | 47136 |                                     |  |
|                |          |                   | 47137 |                                     |  |
|                |          |                   | 47138 |                                     |  |
|                |          |                   |       |                                     |  |
|                | Atypical | Asenapine         | 47921 |                                     |  |
|                |          | Aripiprazole      | 47801 |                                     |  |
|                |          | Brexpiprazole     | 48153 |                                     |  |
|                |          | Clozapine         | 45580 |                                     |  |
|                |          | Lurasidone        | 47939 |                                     |  |

|                                                                                 |        |                 |       |                                       |  |
|---------------------------------------------------------------------------------|--------|-----------------|-------|---------------------------------------|--|
|                                                                                 |        | Olanzapine      | 46318 |                                       |  |
|                                                                                 |        |                 | 47197 |                                       |  |
|                                                                                 |        | Paliperidone    | 47708 |                                       |  |
|                                                                                 |        |                 | 47861 |                                       |  |
|                                                                                 |        | Quetiapine      | 47267 |                                       |  |
|                                                                                 |        | Risperidone     | 46156 |                                       |  |
|                                                                                 |        |                 | 47052 |                                       |  |
|                                                                                 |        | Ziprazidone     | 47717 |                                       |  |
|                                                                                 |        |                 |       |                                       |  |
|                                                                                 |        |                 |       |                                       |  |
| <b>Antidepressants - Those mostly used for depression and anxiety disorders</b> |        |                 |       |                                       |  |
|                                                                                 |        |                 |       |                                       |  |
|                                                                                 | SSRIs  | Citalopram      | 46543 |                                       |  |
|                                                                                 |        |                 | 47317 |                                       |  |
|                                                                                 |        | Escitalopram    | 47553 |                                       |  |
|                                                                                 |        |                 | 47971 |                                       |  |
|                                                                                 |        | Fluoxetine      | 45504 |                                       |  |
|                                                                                 |        | Fluvoxamine     | 45633 |                                       |  |
|                                                                                 |        | Paroxetine      | 47061 |                                       |  |
|                                                                                 |        | Sertraline      | 45630 |                                       |  |
|                                                                                 |        |                 |       |                                       |  |
|                                                                                 | SNRIs  | Desvenlafaxine  | 47770 |                                       |  |
|                                                                                 |        | Duloxetine      | 47714 |                                       |  |
|                                                                                 |        | Levomilnacipran | 48075 |                                       |  |
|                                                                                 |        | Venlafaxine     | 46244 |                                       |  |
|                                                                                 |        |                 | 47118 |                                       |  |
|                                                                                 | NDRI   | Bupropion       | 46435 | (Also used for tobacco cessation)     |  |
|                                                                                 |        |                 | 47285 |                                       |  |
|                                                                                 |        |                 | 48205 | (In combination with naltrexone)      |  |
|                                                                                 | NaSSAs | Mirtazapine     | 46744 | (Also used in low doses for insomnia) |  |
|                                                                                 |        |                 | 47408 |                                       |  |
|                                                                                 | MAOI   | Phenelzine      | 7280  |                                       |  |

|                                                                                                             |                            |                 |       |                                 |  |
|-------------------------------------------------------------------------------------------------------------|----------------------------|-----------------|-------|---------------------------------|--|
|                                                                                                             |                            | Tranlycypromine | 9698  |                                 |  |
|                                                                                                             |                            |                 |       |                                 |  |
|                                                                                                             | IRMA                       | Moclobemide     | 46427 |                                 |  |
|                                                                                                             |                            |                 | 47005 |                                 |  |
|                                                                                                             |                            |                 |       |                                 |  |
|                                                                                                             | SRI+ 5HT1a partial agonist | Vilazodone      | 48227 |                                 |  |
|                                                                                                             |                            |                 |       |                                 |  |
|                                                                                                             | Serotonin modulator        | Vortioxetine    | 48038 |                                 |  |
|                                                                                                             |                            |                 |       |                                 |  |
|                                                                                                             |                            |                 |       |                                 |  |
| <b>Other antidepressants - Those mostly used for other indications than depression or anxiety disorders</b> |                            |                 |       |                                 |  |
|                                                                                                             |                            |                 |       |                                 |  |
|                                                                                                             | Tricyclics                 | Amitryptiline   | 429   |                                 |  |
|                                                                                                             |                            |                 | 46011 | (Combination with perphenazine) |  |
|                                                                                                             |                            | Clomipramine    | 14781 |                                 |  |
|                                                                                                             |                            | Desipramine     | 2522  |                                 |  |
|                                                                                                             |                            | Doxepine        | 3198  |                                 |  |
|                                                                                                             |                            | Imipramine      | 4784  |                                 |  |
|                                                                                                             |                            | Nortriptyline   | 6578  |                                 |  |
|                                                                                                             |                            | Trimipramine    | 9906  |                                 |  |
|                                                                                                             |                            |                 |       |                                 |  |
|                                                                                                             |                            |                 |       |                                 |  |
|                                                                                                             | Inh. S recap + antag 5-HT2 | Trazodone       | 43137 |                                 |  |
|                                                                                                             |                            |                 |       |                                 |  |
|                                                                                                             |                            |                 |       |                                 |  |
| <b>Mood stabilizers (other than antipsychotics and other medications included in other classes)</b>         |                            |                 |       |                                 |  |
|                                                                                                             |                            |                 |       |                                 |  |
|                                                                                                             |                            | Carbamazepine   | 1404  |                                 |  |
|                                                                                                             |                            |                 | 10270 |                                 |  |
|                                                                                                             |                            | Gabapentin      | 46229 |                                 |  |
|                                                                                                             |                            |                 | 47100 |                                 |  |
|                                                                                                             |                            | Lamotrigine     | 47110 |                                 |  |
|                                                                                                             |                            |                 | 46248 |                                 |  |
|                                                                                                             |                            | Lithium         | 47071 |                                 |  |
|                                                                                                             |                            |                 | 47237 |                                 |  |



|                    |                 |                            |       |  |  |
|--------------------|-----------------|----------------------------|-------|--|--|
|                    |                 |                            | 47589 |  |  |
|                    |                 |                            | 5330  |  |  |
|                    |                 | Oxcarbazepine              | 46805 |  |  |
|                    |                 |                            | 47430 |  |  |
|                    |                 | Topiramate                 | 46359 |  |  |
|                    |                 |                            | 47229 |  |  |
|                    |                 | Valproic acid              | 38951 |  |  |
|                    |                 |                            | 39393 |  |  |
|                    |                 |                            | 44073 |  |  |
|                    |                 |                            |       |  |  |
| <b>Anxiolytics</b> |                 |                            |       |  |  |
|                    | Benzodiazépines | Alprazolam                 | 43501 |  |  |
|                    |                 | Bromazepam                 | 43488 |  |  |
|                    |                 | Chlordiazépoxide           | 1807  |  |  |
|                    |                 | Clobazam                   | 45591 |  |  |
|                    |                 | Clonazépam                 | 37872 |  |  |
|                    |                 | Clorazépate                | 14768 |  |  |
|                    |                 | Diazépam                   | 2717  |  |  |
|                    |                 | Flurazépam                 | 4095  |  |  |
|                    |                 | Lorazépam                  | 37950 |  |  |
|                    |                 | Nitrazépam                 | 42045 |  |  |
|                    |                 | Oxazepam                   | 6786  |  |  |
|                    |                 | Temazepam                  | 41590 |  |  |
|                    |                 | Triazolam                  | 39029 |  |  |
|                    |                 |                            |       |  |  |
|                    | Buspirone       | Buspirone                  | 45609 |  |  |
|                    |                 |                            |       |  |  |
| <b>ADHD</b>        |                 |                            |       |  |  |
|                    |                 | Amphetamine                | 507   |  |  |
|                    |                 |                            | 47601 |  |  |
|                    |                 |                            | 48001 |  |  |
|                    |                 | Amphetamine/dexamphetamine | 47486 |  |  |
|                    |                 | Atomoxetine                | 47547 |  |  |
|                    |                 | Dexamphetamine             | 2626  |  |  |
|                    |                 |                            |       |  |  |
|                    |                 | Lisdexamfetamine           | 47818 |  |  |
|                    |                 |                            | 48000 |  |  |
|                    |                 | Methylphenidate            | 48003 |  |  |

|                            |                           |              |       |  |  |
|----------------------------|---------------------------|--------------|-------|--|--|
|                            |                           |              | 39302 |  |  |
|                            |                           | Guanfacine   | 47979 |  |  |
|                            |                           |              |       |  |  |
| <b>Alzheimer's disease</b> |                           |              |       |  |  |
|                            | Inh. Acetylcholinesterase | Donepezil    | 47352 |  |  |
|                            |                           | Galantamine  | 47415 |  |  |
|                            |                           |              | 46767 |  |  |
|                            |                           | Rivastigmine | 47726 |  |  |
|                            |                           |              | 46673 |  |  |
|                            |                           |              | 47368 |  |  |
|                            | NMDA                      | Memantine    | 47542 |  |  |

## Medication classes – other

| MAIN CLASSES                   | Sub-classes that may be studied | AHFS codes or Medications |                                                  |  |  |                                                                   |
|--------------------------------|---------------------------------|---------------------------|--------------------------------------------------|--|--|-------------------------------------------------------------------|
|                                |                                 |                           |                                                  |  |  |                                                                   |
| <b>Diabetes</b>                |                                 | AHFS sub-class            |                                                  |  |  |                                                                   |
|                                |                                 | 68:20                     | Antidiabetes                                     |  |  |                                                                   |
|                                |                                 |                           |                                                  |  |  |                                                                   |
| <b>Cardiovascular diseases</b> |                                 |                           |                                                  |  |  |                                                                   |
|                                |                                 | AFHS sub-class            |                                                  |  |  |                                                                   |
|                                | Antithrombotics                 | 20:12                     | Antithrombotics (anticoagulants, antiplatelets)  |  |  | et ajouter les CODES DÉNOMINATIONS COMMUNE ASPIRINE: 143 et 46353 |
|                                | Antihypertensive agents         | 24:08                     | Antihypertensives (alpha-agonists, vasodilators) |  |  |                                                                   |
|                                |                                 | 24:20                     | Alpha-blockers                                   |  |  |                                                                   |
|                                |                                 | 24:24                     | Beta-blockers                                    |  |  |                                                                   |
|                                |                                 | 24:28                     | Calcium channel blockers                         |  |  |                                                                   |
|                                |                                 | 24:32                     | ACE inhibitors and ARBs                          |  |  |                                                                   |

|                                                                        |                              |                            |                                           |                           |  |  |                                                                  |
|------------------------------------------------------------------------|------------------------------|----------------------------|-------------------------------------------|---------------------------|--|--|------------------------------------------------------------------|
|                                                                        |                              | 40:28                      | Diuretics                                 |                           |  |  |                                                                  |
|                                                                        | Antiarythmic and cardiotonic | 24:04                      | Cardiotropic (antiarythmics, cariotonics) |                           |  |  |                                                                  |
|                                                                        | Hypolipemians                | 24:06                      | Hypolipemians (statins, fibrates, etc)    |                           |  |  |                                                                  |
|                                                                        | Vasodilators                 | 24:12                      | Nitrates and other vasodilators           |                           |  |  |                                                                  |
| <b>Respiratory diseases (mediations used to treat COPD and asthma)</b> |                              |                            |                                           |                           |  |  |                                                                  |
|                                                                        |                              | Medications                |                                           | Code denomination commune |  |  |                                                                  |
|                                                                        |                              | Acilidium                  |                                           | 47986                     |  |  |                                                                  |
|                                                                        |                              | Glycopyrronium             |                                           | 47949                     |  |  |                                                                  |
|                                                                        |                              | Tiotropium                 |                                           | 46856                     |  |  |                                                                  |
|                                                                        |                              | Uméclidinium               |                                           | 48109                     |  |  |                                                                  |
|                                                                        |                              | Formotérol                 |                                           | 47916                     |  |  |                                                                  |
|                                                                        |                              | Indacatérol                |                                           | 47923                     |  |  |                                                                  |
|                                                                        |                              | Salmétérol                 |                                           | 46247                     |  |  |                                                                  |
|                                                                        |                              |                            |                                           | 47112                     |  |  |                                                                  |
|                                                                        |                              | Olodatérol                 |                                           |                           |  |  |                                                                  |
|                                                                        |                              | Glycopyrronium/indacatérol |                                           | 48033                     |  |  |                                                                  |
|                                                                        |                              | Uméclidinium/vilantérol    |                                           | 48224                     |  |  |                                                                  |
|                                                                        |                              |                            |                                           | 48029                     |  |  |                                                                  |
|                                                                        |                              | Acilidium/formotérol       |                                           |                           |  |  |                                                                  |
|                                                                        |                              | Tiotropium/Olodatérol      |                                           | 48064                     |  |  |                                                                  |
|                                                                        |                              | Budésonide/formotérol      |                                           | 47428                     |  |  |                                                                  |
|                                                                        |                              |                            |                                           | 46800                     |  |  |                                                                  |
|                                                                        |                              |                            |                                           | 47917                     |  |  |                                                                  |
|                                                                        |                              |                            |                                           | 47925                     |  |  |                                                                  |
|                                                                        |                              | Fluticasone/salmétérol     |                                           | 46597                     |  |  |                                                                  |
|                                                                        |                              |                            |                                           | 47335                     |  |  |                                                                  |
|                                                                        |                              | Fluticasone/vilantérol     |                                           | 48006                     |  |  |                                                                  |
|                                                                        |                              | Salbutamol                 |                                           | 10530                     |  |  | Exclure les codes de forme: 116, 203,435, 2262, 2088, 2117, 4147 |
|                                                                        |                              |                            |                                           | 33634                     |  |  |                                                                  |
|                                                                        |                              |                            |                                           | 46737                     |  |  |                                                                  |



|                              |  |                             |                                                   |                                                                 |                                           |      |
|------------------------------|--|-----------------------------|---------------------------------------------------|-----------------------------------------------------------------|-------------------------------------------|------|
|                              |  |                             |                                                   | 56:14                                                           | Cholelitholytics                          |      |
|                              |  |                             |                                                   | 56:16                                                           | Digestives                                |      |
|                              |  |                             |                                                   | 56:22                                                           | Anti-emetics                              |      |
|                              |  |                             |                                                   | 56:28                                                           | Anti-acids                                |      |
|                              |  |                             |                                                   | 56:32                                                           | Pro-kinetics                              |      |
|                              |  |                             |                                                   | 56:36                                                           | Gastro-intestinal anti-inflammatory drugs |      |
|                              |  |                             |                                                   | 56:92                                                           | Miscellaneous                             |      |
|                              |  |                             |                                                   |                                                                 |                                           |      |
| <b>Anti-infective agents</b> |  | <b>AHFS class</b>           |                                                   | (Example of sub-classes that are included in the the 08. class) |                                           |      |
|                              |  | 08.xx                       |                                                   | 8:08                                                            | Anthelmintics                             |      |
|                              |  |                             |                                                   | 8:12                                                            | Antibacterials                            |      |
|                              |  |                             |                                                   | 8:14                                                            | Antifungals                               |      |
|                              |  |                             |                                                   | 8:16                                                            | Antimycobacterials                        |      |
|                              |  |                             |                                                   | 8:18                                                            | Antivirals                                |      |
|                              |  |                             |                                                   | 8:30                                                            | Antiprotozoals                            |      |
|                              |  |                             |                                                   | 8:36                                                            | Urinary Anti-infectives                   |      |
|                              |  |                             |                                                   | 9:32                                                            | Anti-Infectives, Miscellaneous            |      |
|                              |  |                             |                                                   |                                                                 |                                           |      |
|                              |  |                             |                                                   |                                                                 |                                           |      |
|                              |  |                             |                                                   |                                                                 |                                           |      |
| <b>Antineoplastic agents</b> |  | <b>AHFS class</b>           |                                                   |                                                                 |                                           |      |
|                              |  | 10.xx                       |                                                   |                                                                 |                                           |      |
|                              |  |                             |                                                   |                                                                 |                                           |      |
|                              |  |                             |                                                   |                                                                 |                                           |      |
| <b>Pain</b>                  |  | <b>AHFS subclass</b>        |                                                   |                                                                 |                                           |      |
|                              |  | 28:08                       | Analgesic and antipyretics (NSAIDs, opioids, etc) |                                                                 |                                           | SAUF |
|                              |  | <b>Specific medicaitons</b> |                                                   | <b>Codes denomination commune</b>                               |                                           |      |
|                              |  | Cyclobenzaprine             |                                                   | 46516                                                           |                                           |      |
|                              |  |                             |                                                   | 38873                                                           |                                           |      |

|                                                                                                                 |  |               |       |            |  |  |  |
|-----------------------------------------------------------------------------------------------------------------|--|---------------|-------|------------|--|--|--|
|                                                                                                                 |  | Baclofene     |       | 41447      |  |  |  |
|                                                                                                                 |  |               |       | 46337      |  |  |  |
|                                                                                                                 |  | Orphenadrine  |       | 46094      |  |  |  |
|                                                                                                                 |  |               |       | 46254      |  |  |  |
|                                                                                                                 |  |               |       | 6734       |  |  |  |
|                                                                                                                 |  |               |       |            |  |  |  |
| <b>Contraceptives</b>                                                                                           |  | AHFS subclass | 68:12 | Anovulants |  |  |  |
|                                                                                                                 |  |               |       |            |  |  |  |
| Not included: Glaucoma, Osteoporosis, ear/eyes/nose drugs, corticosteroids, skin medications, Parkinson disease |  |               |       |            |  |  |  |

## APPENDIX I\_2: LIST OF THE CANDIDATE INDICATORS AT THE PROGRAMMATIC AND SYSTEM LEVELS SUPPORTED BY THE HEALTH SERVICES AND PUBLIC HEALTH LITERATURE OR PRACTICES

**TABLE 2**  
List of the candidate indicators at the programmatic and system levels supported by the health services and public health literature or practices

| Candidate indicators                                                                                  | Aim                                                                                                                        | Literature support                                                                                                                                                          | Description                                                                                                                                                                                                                       | Measure                                                                                                                                      | Data sources                                                       |
|-------------------------------------------------------------------------------------------------------|----------------------------------------------------------------------------------------------------------------------------|-----------------------------------------------------------------------------------------------------------------------------------------------------------------------------|-----------------------------------------------------------------------------------------------------------------------------------------------------------------------------------------------------------------------------------|----------------------------------------------------------------------------------------------------------------------------------------------|--------------------------------------------------------------------|
| 1. Quality of anxiety or depressive disorders mental health services follow-up in primary care        | Determine adequate care for patient diagnosed with anxiety and depressive disorders in primary care                        | Based on number of physician visits by Wang, et al. <sup>44</sup> and other studies <sup>57,48</sup>                                                                        | Denominator: Individuals aged 15+ years with an anxiety or depressive disorder diagnosis by a General Practitioner (GP) in a given year<br><br>Numerator: Received ≥ 4 visits for mental health in that year                      | Prevalence of individuals 15+ years who received an anxiety or depressive disorder diagnosis with ≥ 4 visits for mental health               | QICDSS                                                             |
| 2. Quality of depression disorder mental health services follow-up in primary care                    | Determine adequate care for patient diagnosed with depression in primary care                                              | Based on number of physician visits by Wang, et al. <sup>44</sup> and other studies <sup>57,48</sup>                                                                        | Denominator: Individuals aged 15+ years with a diagnosis of depression by a General Practitioner (GP) in a given year<br><br>Numerator: Received ≥ 4 visits for mental health in that year                                        | Prevalence of individuals 15+ years who received a depression diagnosis with ≥ 4 visits for mental health                                    | QICDSS                                                             |
| 3. Quality of substance use disorder mental health services follow-up in primary care                 | Determine adequate care for patient diagnosed with substance use disorder in primary care                                  | Based on 4 visits with a family physician for counseling as recommended by NICE <sup>58</sup> and the guidelines for American primary care clinicians <sup>58</sup>         | Denominator: Individuals aged 15+ years with a diagnosis of substance use disorder by a General Practitioner (GP) in a given year<br><br>Numerator: Received ≥ 4 visits for mental health in that year                            | Prevalence of individuals 15+ years who received a substance use disorder diagnosis with ≥ 4 visits for mental health                        | QICDSS                                                             |
| 4. Quality of mental health care services follow-up after hospitalization: readmission within 30 days | Determine the quality of mental specialist health care and in-hospital care                                                | Based on the work of the Canadian Institute for Health Information (CIHI) <sup>65,47,48</sup>                                                                               | Denominator: Individuals aged 15+ years admitted in a hospital with a mental health diagnosis in a given year<br><br>Numerator: Individual readmitted for mental health within 30 days of initial discharge                       | Prevalence of individuals 15+ years who were readmitted to a hospital for a mental health diagnosis within 30 days of initial discharge      | QICDSS                                                             |
| 5. Quality of mental health services follow-up in primary care after suicide attempt                  | Determine the quality of mental health care of readmission rates in the region compared to others                          | Based on the work of the Canadian Institute for Health Information (CIHI) <sup>65,47,48</sup>                                                                               | Denominator: Individuals aged 15+ years admitted to a hospital for suicide attempt in a given year<br><br>Numerator: Received ≥ 1 visit to a physician for mental health within 30 days of hospital discharge for suicide attempt | Prevalence of individuals 15+ years who received ≥ 1 visit from a physician within 30 days of initial discharge for suicide attempt          | QICDSS (linked to MedEcho for suicide attempt) <sup>60,41,38</sup> |
| 6. Quality of community mental health services                                                        | Determine the balance of the community-oriented mental health care system                                                  | Based on the typologies of primary and specialist (including in-hospital care) mental health care <sup>4,45,46,54</sup> used in the study of suicide attempts <sup>55</sup> | Denominator: Individuals aged 15+ years with a mental health diagnosis in a given year<br><br>Numerator: Individuals with exclusively outpatient services – psychiatric or general practitioner (GP)                              | Prevalence of individuals 15+ years who received a mental health disorder diagnosis with exclusively outpatient services (psychiatric or GP) | QICDSS                                                             |
| 7. Quality of community mental health services of patients with severe mental illness                 | Determine the balance of psychiatric outpatient and primary outpatient care depending on the profiles used <sup>4,55</sup> | Based on the associations found for the balance between primary and specialist mental health care and suicide rates <sup>2,46,60,61</sup>                                   | Denominator: Individuals aged 15+ years with exclusively a GP or a psychiatric outpatient visit for psychotic disorder<br><br>Numerator: Number of individuals with exclusively a GP or psychiatrist outpatient visits            | Prevalence of individuals 15+ years who received a severe mental illness disorder diagnosis and used exclusively outpatient services by a GP | QICDSS                                                             |
| 8. Quality of community mental health services of patients with common mental disorders               | Determine the balance of psychiatric outpatient and primary outpatient care depending on the profiles used <sup>4,55</sup> | Based on the associations found for the balance between primary and specialist mental health care and suicide rates <sup>2,46,60,61</sup>                                   | Denominator: Individuals aged 15+ years with a psychiatric or a GP outpatient visit for depression<br><br>Numerator: Number of individuals with exclusively GP outpatient visits                                                  | Prevalence of individuals 15+ years who received a common mental disorder diagnosis and used exclusively outpatient services by a GP         | QICDSS                                                             |

Continued on the following page

**TABLE 2 (continued)**  
**List of the candidate indicators at the programmatic and system levels supported by the health services and public health literature or practices**

| Candidate indicators                                                                    | Aim                                                                                                                                           | Literature support                                                                                                                      | Description                                                                                                                                                                                                             | Measure                                                                                                                                  | Data sources                                                                                         |
|-----------------------------------------------------------------------------------------|-----------------------------------------------------------------------------------------------------------------------------------------------|-----------------------------------------------------------------------------------------------------------------------------------------|-------------------------------------------------------------------------------------------------------------------------------------------------------------------------------------------------------------------------|------------------------------------------------------------------------------------------------------------------------------------------|------------------------------------------------------------------------------------------------------|
| 9. Quality of community mental health services of patients with substance use disorders | Determine the balance of psychiatric outpatient and primary outpatient care depending on the profiles used <sup>4,55</sup>                    | Based on the associations found for the balance between primary and specialist mental health care and suicide rates <sup>46,60,61</sup> | Denominator: Individuals aged 15+ years with a psychiatric or a GP outpatient visit for substance use disorder<br><br>Numerator: Number of individuals with exclusively GP outpatient visits                            | Prevalence of individuals 15+ years who received a substance use disorder diagnosis and used exclusively outpatient services by a GP     | QICDSS                                                                                               |
| 10. Quality of community mental health services of patients with personality disorders  | Determine the balance of psychiatric outpatient and primary outpatient care depending on the profiles used <sup>4,55</sup>                    | Based on the associations found for the balance between primary and specialist mental health care and suicide rates <sup>46,60,61</sup> | Denominator: Individuals aged 15+ years with exclusively a GP or a psychiatric outpatient visit for personality disorder<br><br>Numerator: Number of individuals with exclusively a GP or psychiatric outpatient visits | Prevalence of individuals 15+ years who received a personality disorder diagnosis and used exclusively outpatient services by a GP       | QICDSS                                                                                               |
| 11. Adequate use of emergency room for mental health services                           | Determine the balance of utilization of emergency room (ER) for mental health reasons <sup>4,55</sup>                                         | Based on the associations found for the balance between primary and specialist mental health care and suicide rates <sup>46,60,61</sup> | Denominator: Individuals aged 15+ years with a diagnosis of a mental health disorder<br><br>Numerator: Number of individuals with ER visits without being admitted                                                      | Prevalence of individuals 15+ years who received a diagnosis of mental health disorder with exclusively ER visits without being admitted | QICDSS                                                                                               |
| 12. Program expenditures for mental health services                                     | Determine the strength of the relationship between changes in suicide rates and expenditures for mental health (regional and provincial)      | Based on associations found between mental health budget and suicide rates <sup>71,72</sup>                                             | Refer to the Gouvernement du Québec <sup>43</sup>                                                                                                                                                                       | Dollars per capita spent on mental health programs (provincial and regional)                                                             | Annual financial reports from the Ministère de la santé et des services sociaux (MSSS) <sup>43</sup> |
| 13. Program expenditures for addiction services                                         | Determine the strength of the relationship between changes in suicide rates and expenditures for addiction services (regional and provincial) | Based on associations found between mental health budget and suicide rates <sup>71,72</sup>                                             | Refer to the Gouvernement du Québec <sup>43</sup>                                                                                                                                                                       | Dollars per capita spent on health programs for addiction services (provincial and regional)                                             | Annual financial reports from the MSSS <sup>43</sup>                                                 |

**Abbreviations:** CIHI, Canadian Institute for Health Information; ER, emergency room; GP, general practitioner; MSSS, Ministère de la santé et des services sociaux; QICDSS, Quebec Integrated Chronic Disease Surveillance System.

<sup>4</sup> Profile 1: psychiatric inpatient care; profile 2: hospital emergency room (ER); profile 3: psychiatric outpatient care; profile 4: general practitioner (GP) clinics; and profile 5: other medical specialist.
